# Supplementary material for: Regioselective C(sp2)–H imidation of arenes by redox neutral visible-light photocatalysis
Source: Royal Society of Chemistry journal article supplement (doi:10.1039/d2ob02040h), 2022-12-09

# Supporting Information

## ***Regio-selective C (sp<sup>2</sup>)-H imidation of Arenes by Redox Neutral Visible-Light Photo Catalysis***

Manoj Kumar Ghosh, Kumari Swati Sharma and Ganesh Pandey\*

Department of Chemistry, Institute of Science, Banaras Hindu University (B. H. U.), Varanasi-221005, U.P. India.

### **Table of Contents:**

|                                                                                                                                |     |
|--------------------------------------------------------------------------------------------------------------------------------|-----|
| 1. Optimization of Reaction Condition-----                                                                                     | S2  |
| 2. Controlled Experiments-----                                                                                                 | S2  |
| 3. UV-vis absorption spectrum of [Ir{(dF)(CF <sub>3</sub> )ppy} <sub>2</sub> (dtbpy)]PF <sub>6</sub> and imide ( <b>1a</b> )-- | S3  |
| 4. UV-vis absorption spectrum of imide ( <b>1i</b> )-----                                                                      | S4  |
| 5. Fluorescence quenching experiment-----                                                                                      | S4  |
| 6. Unsuccessful attempts-----                                                                                                  | S7  |
| 7. Reaction setup-----                                                                                                         | S7  |
| 8. Preparation of Imides-----                                                                                                  | S7  |
| 9. Preparation N-hydroxy phthalamides-----                                                                                     | S8  |
| 10. Details of Catalyst Used-----                                                                                              | S9  |
| 11. Ipso mechanism-----                                                                                                        | S10 |
| 12. References-----                                                                                                            | S10 |
| 13. HRMS of TEMPO adduct (From Reaction mixture) -----                                                                         | S11 |
| 14. HRMS of BHT adduct (From reaction mixture)-----                                                                            | S12 |
| 15. HRMS data of a reaction mixture ( Mechanistic Support) -----                                                               | S13 |
| 16. HRMS data of the radical trapping experiment-----                                                                          | S13 |
| 17. Experimental Spectra ( <sup>1</sup> H & <sup>13</sup> C copies)-----                                                       | S14 |

**1. Optimization of Reaction Condition:** Reaction are performed with different equivalent of Arnes and imides as well as different mol % of catalyst loading. (**Table-1**)

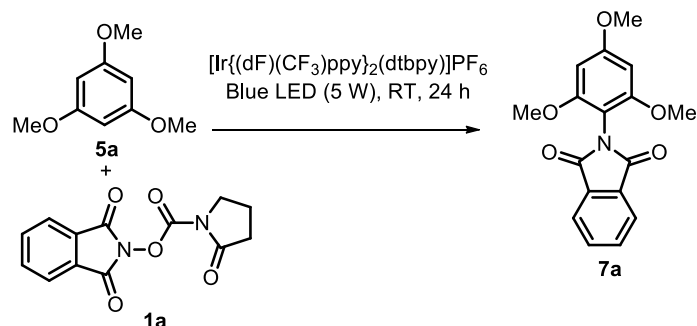

| Entry | Imide<br>(equiv) | Arene<br>(equiv) | Catalyst<br>(mol %) | Solvent | Yield<br>(%) |
|-------|------------------|------------------|---------------------|---------|--------------|
| 1     | 1                | 1                | 1                   | 5 mL    | 55           |
| 2     | 1                | 1.2              | 1                   | 5 mL    | 60           |
| 3     | 1.2              | 1                | 1                   | 5 mL    | 55           |
| 4     | 1.3              | 1                | 0.5-1               | 8 mL    | 60           |
| 5     | 1.5              | 1                | 1                   | 10 mL   | 35           |
| 6     | 2                | 1                | 1                   | 10 mL   | 15           |
| 7     | 1                | 2                | 0.5-1               | 5 mL    | 45           |
| 8     | 1                | 4                | 0.5-1               | 5 mL    | 50           |
| 9     | 1                | 1                | 5                   | 5 mL    | 45           |

**Table -1:** Optimization of Reaction Condition

**N.B.** The limiting reactants used as 0.5 mmol (1 equivalent). All the reported yields are isolated yields after purification.

## 2. Controlled Experiments:

To understand the mechanism insight some controlled experiment has been done with the radical trapping experiments. The reaction in presence of TEMPO and BHT were suppressed and produce trace amount of the coupling product, although we are unable to isolate the radical-trapping adduct with TEMPO and BHT but detected by HRMS. These controlled experiments support the radical-N cross coupling reaction.

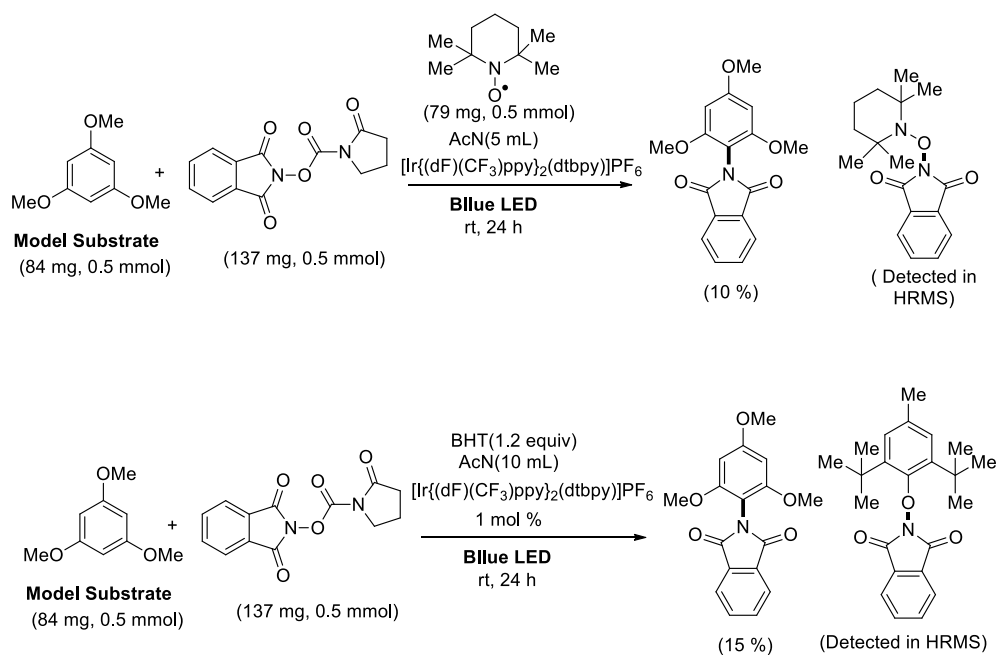

**Scheme-1:** Controlled radical-trapping experiment using TEMPO and BHT

**3. UV-vis absorption spectrum of  $[\text{Ir}\{(\text{dF})(\text{CF}_3)\text{ppy}\}_2(\text{dtbbpy})]\text{PF}_6$  and imide (1a):** UV-vis spectra has been recorded on a Shimadzu 1800 instrument.

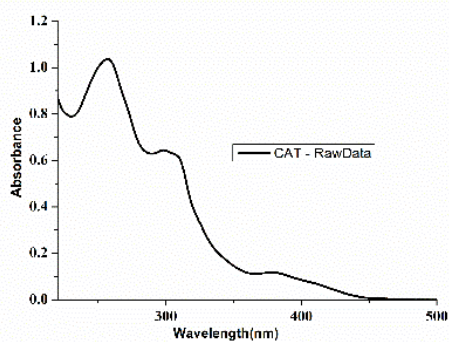

UV-vis absorption spectrum of  $[\text{Ir}\{(\text{dF})(\text{CF}_3)\text{ppy}\}_2(\text{dtbbpy})]\text{PF}_6$  (15  $\mu\text{M}$  in acetonitrile) (Figure-1)

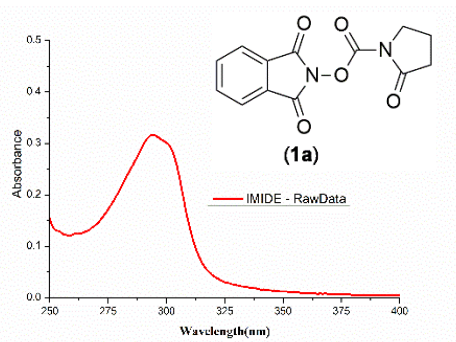

UV-vis absorption spectrum of imide (1a) (100  $\mu\text{M}$  in acetonitrile)  $\lambda_{\text{max}} = 295\text{nm}$  (Figure-2)

**4. UV-vis absorption spectrum of imide (1i):** UV-vis spectra has been recorded on a Shimadzu 1800 instrument.

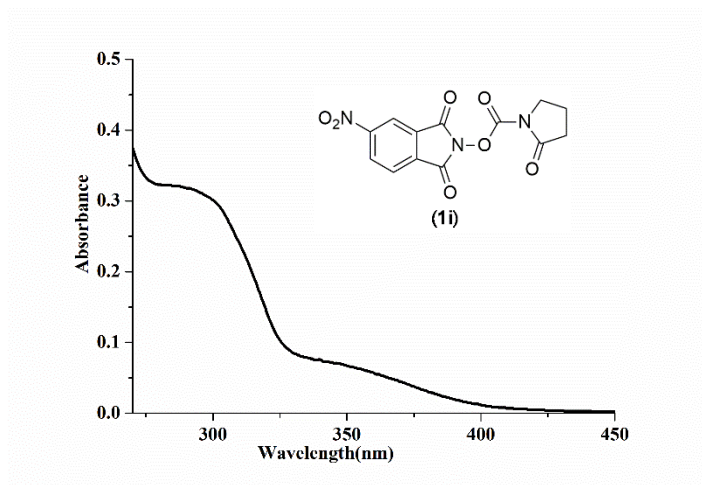

UV-vis absorption spectrum of imide (1i) (100  $\mu$ M in acetonitrile) (Figure-3)

**5. Fluorescence quenching of [Ir{(dF)(CF<sub>3</sub>)ppy}<sub>2</sub>(dtbpy)]PF<sub>6</sub> with varying concentration of 1,3 dioxisoindolin-2-yl 2-oxopyrrolidine-1-carboxylate (1a):** Emission spectra has been recorded on a Perkin Elmer LS55 Fluorescence instrument.

A stock solution of [Ir{(dF)(CF<sub>3</sub>)ppy}<sub>2</sub>(dtbpy)]PF<sub>6</sub> (0.1 mM) was prepared by dissolving 2.8 mg of [Ir{(dF)(CF<sub>3</sub>)ppy}<sub>2</sub>(dtbpy)]PF<sub>6</sub> in 25 mL of acetonitrile. The catalyst stock solution of the above concentration was distributed into five 10 mL standard flasks equally (1 mL in each flask). In the same way, stock solution of imide **1a** (1 mM) was prepared by dissolving 6.8 mg of **1a** in 25 mL of acetonitrile. From the above stock solution of imide **1a**, 0 mL, 1.5 mL, 2.5 mL, 5 mL, and 8 mL were pipetted out and added to the above five 10 mL standard volumetric flasks containing 1 mL of catalyst stock solution and diluted to 10 mL with acetonitrile. The fluorescence spectrum of flask 1 containing only 0.01 mM Ir(III)-catalyst was measured by exciting at 420 nm ( $\lambda_{ex}$ ) and emission was measured at 476 nm ( $\lambda_{em}$ ). Similarly, fluorescence intensity of other solutions containing different concentration of imide (**1a**) was measured (Figure-4). The details of decrease in fluorescence intensity by increased concentration of imide (**1a**) are shown in below Table-2

| SL No   | Concentration of Imide (mM) | wavelength | I <sub>0</sub> | I          | I <sub>0</sub> /I |
|---------|-----------------------------|------------|----------------|------------|-------------------|
| Ir(III) | 0                           | 476        | 126.978372     | 126.978372 | 1                 |
| A1      | 0.15                        | 476        | 126.978372     | 125.588657 | 1.01              |
| A2      | 0.25                        | 476        | 126.978372     | 126.978372 | 1.02              |
| A3      | 0.55                        | 476        | 126.978372     | 122.304842 | 1.04              |
| A4      | 0.80                        | 476        | 126.978372     | 120.129439 | 1.06              |

**Table-2:** Fluorescence quenching of Ir(III) with varying concentration Imide (**1a**)

Analysis of the above tabulated data using Stern-Volmer quenching kinetic equation and by plotting I<sub>0</sub>/I on Y-axis with corresponding concentration of imide (**1a**) on X-axis resulted a straight line (**Figure-5**). The slope of the curve was 0.0747 and the intercept on Y-axis is 0.999. Incorporating the excited-state lifetime of [Ir{(dF)(CF<sub>3</sub>)ppy}<sub>2</sub>(dtbpy)]PF<sub>6</sub> (τ<sub>0</sub> = 2.3 μS = 2.3X 10<sup>-6</sup> S)<sup>1</sup> in the slope, rate of quenching K<sub>q</sub> was measured as shown below-

$$I_0/I = 1 + K_q \tau [Q]$$

Where, I<sub>0</sub>/I = ratio of intensity of fluorescence without and with quencher concentration.

K<sub>q</sub> = Rate constant for quenching, τ = life time of catalyst, [Q] = concentration of quencher.

Here slope = K<sub>q</sub>τ<sub>0</sub>

So, 0.0747 = K<sub>q</sub>τ<sub>0</sub> , or K<sub>q</sub> = 0.0747/ τ<sub>0</sub>

$$= 0.0747/[2.3 \times 10^{-6}]$$

$$= 3.2 \times 10^4 \text{ M}^{-1} \text{ S}^{-1}$$

So the measured experimental quenching rate constant (K<sub>q</sub>) = 3.2 X10<sup>4</sup> M<sup>-1</sup> S<sup>-1</sup>

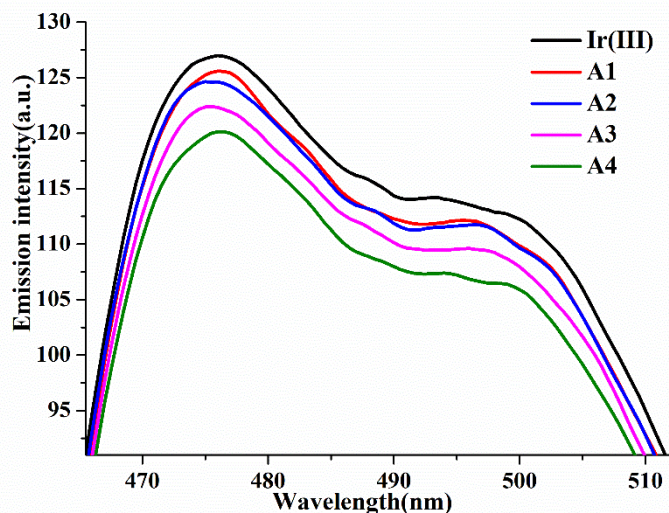

**Figure-4:** Fluorescence quenching spectra of  $[\text{Ir}\{(\text{dF})(\text{CF}_3)\text{ppy}\}_2(\text{dtbbpy})]\text{PF}_6$  (0.01 mM) with varying concentration of Imide (**1a**). All the samples excited at 420 nm ( $\lambda_{\text{ex}}$ ) and emission was measured at 476 nm ( $\lambda_{\text{em}}$ ). Ir (III)-only Catalyst. A1 = 0.15 mM solution of imide **1a** + catalyst Ir(III) (0.01 mM); A2 = 0.25 mM solution of imide **1a** + catalyst Ir(III) (0.01 mM); A3 = 0.5 mM solution of imide **1a** + catalyst Ir(III) (0.01 mM); A4 = 0.8 mM solution of imide **1a** + catalyst Ir(III) (0.01 mM);

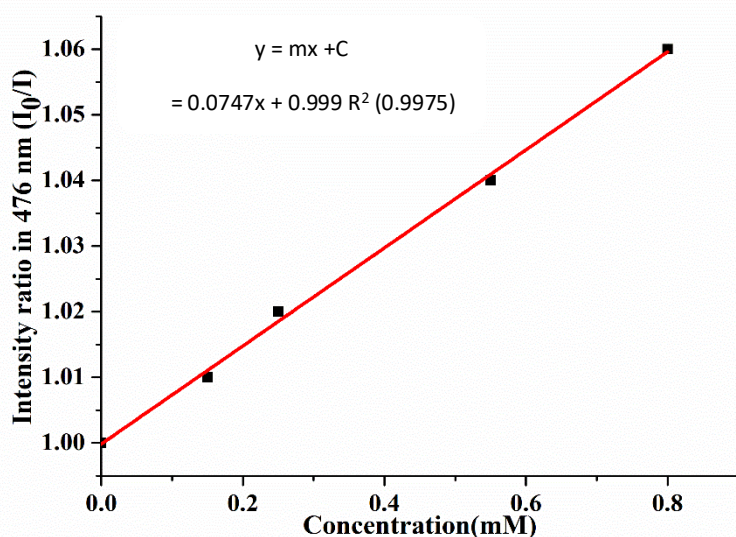

**Figure-5:** Stern-Volmer plot [ $I_0/I$  on Y-axis with corresponding concentration of imide (**1a**) on X-axis] Intercept = 0.999; slope = .0747;  $R^2 = 0.9975$ ;

## 5. Unsuccessful attempts:

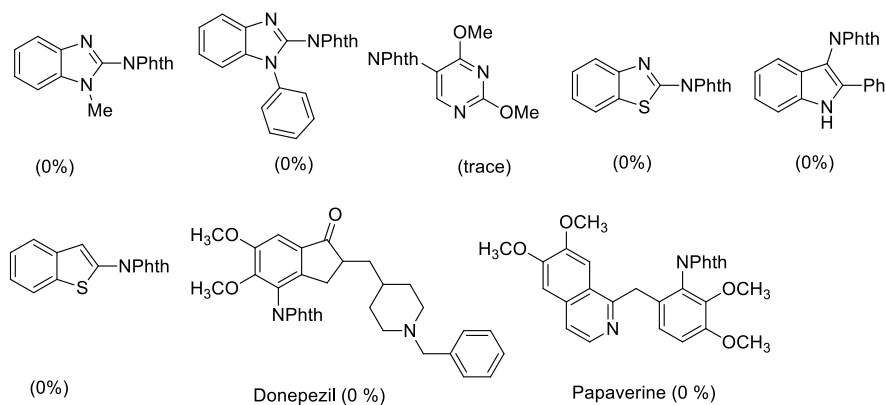

**6. Reaction setup-** 5W blue LED light placed 2 cm below from the reaction flask and stirred at room temperature

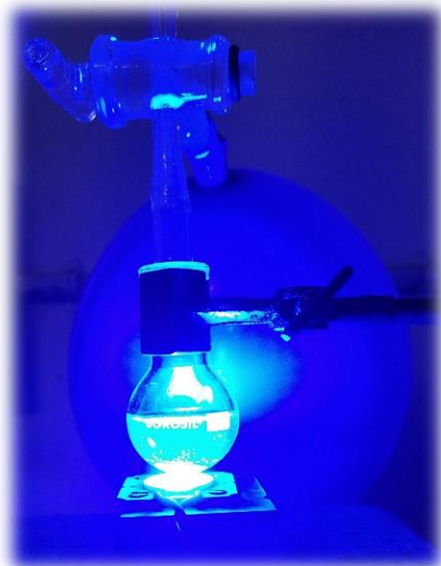

**Figure-6:** Photochemical reaction setup

**7. Preparation of Imides:** The following imides are synthesized using the general experimental procedure (A) presented in the manuscript:

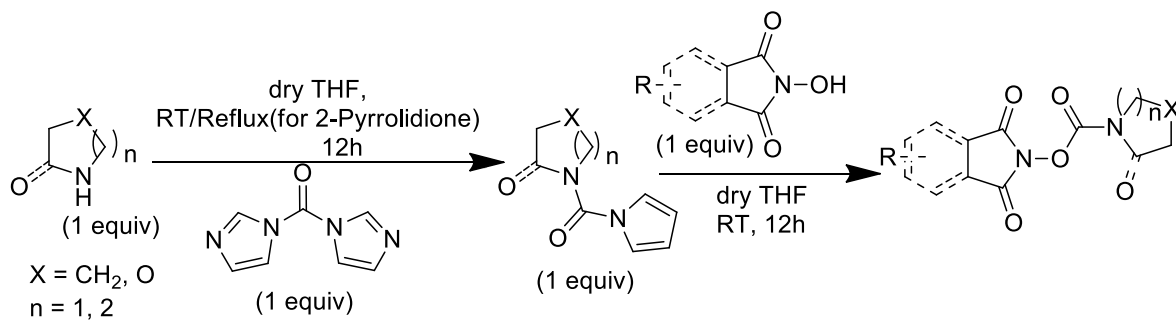

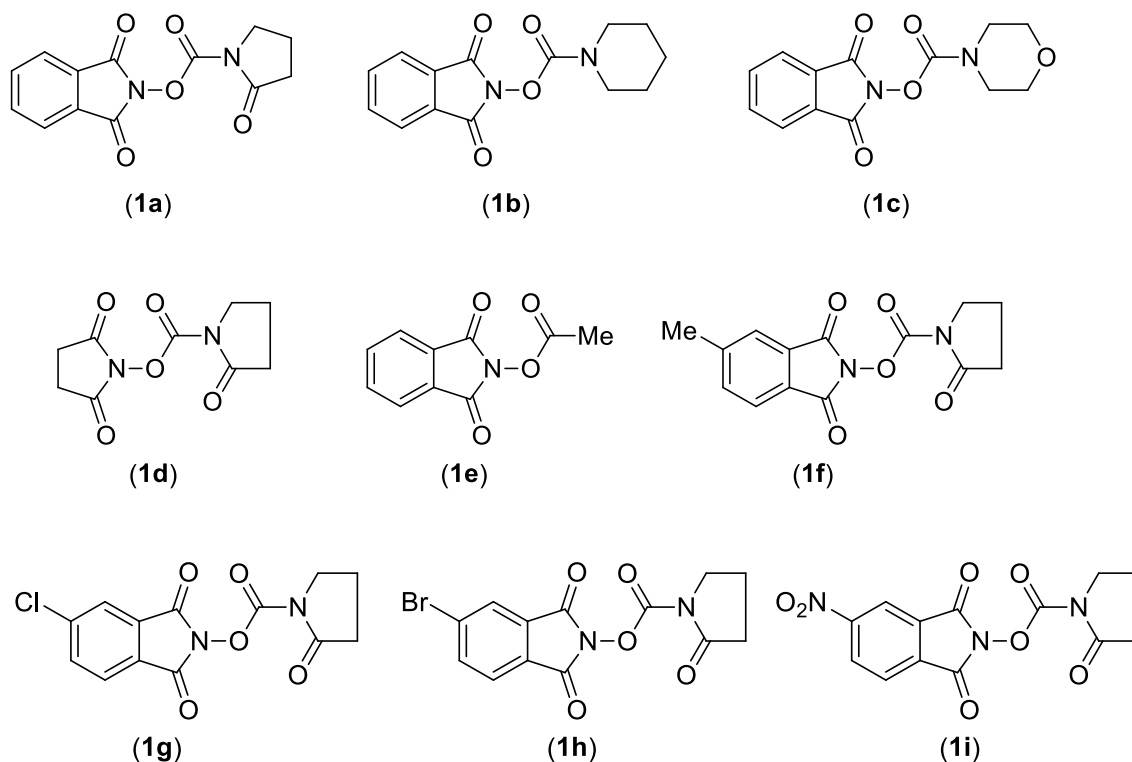

**8. Preparation N-hydroxy phthalamides:** The different derivative of N-hydroxy phthalamides are prepared as follows- In a round bottom flask hydroxylamine hydrochloride (1.1 equiv) and sodium acetate (1.35 equiv) was taken and then added acetic acid 1 ml/mmol of phthalic anhydride used. Then the mixture was reflux for 30 minutes and then formed NaCl was filtered and phthalic anhydride derivative (1 equiv) was dissolved in the filtrate and reflux for additional 1h. After that the reaction mixture was poured into ice cold water. Then the precipitate was collected by filtration and washed with cold water and dried in high vacuum for 1h and used without purification.

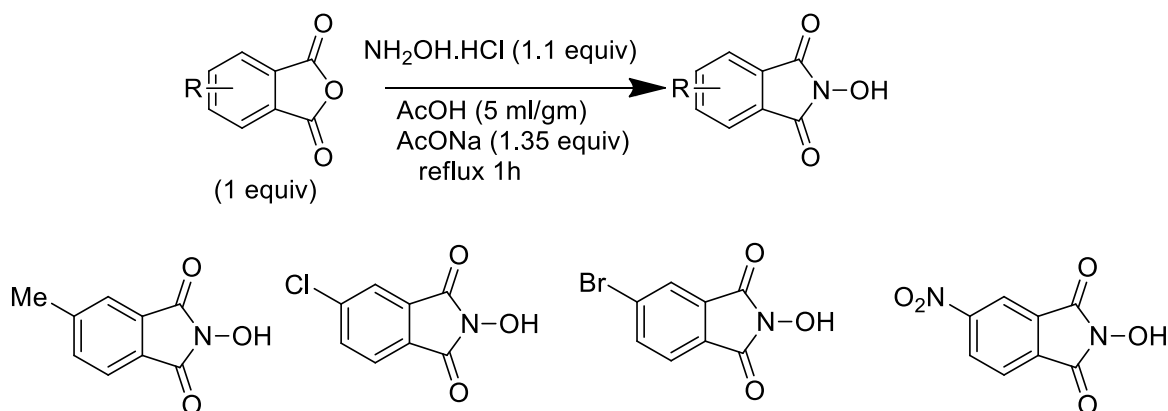



## 8. Details of Catalyst Used:<sup>2</sup>

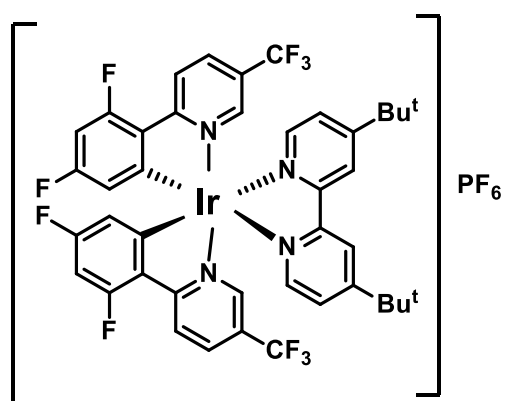

**[Ir{(dF)(CF<sub>3</sub>)ppy}<sub>2</sub>(dtbbpy)]PF<sub>6</sub>**

$$E_{1/2}^{IV/III^*} = -0.89 \text{ V vs SCE}$$

$$E_{1/2}^{III^*/II} = +1.21 \text{ V vs SCE}$$

$$\lambda_{\text{max}} = 380 \text{ nm}$$

$$\tau = 2.3 \mu\text{s}$$

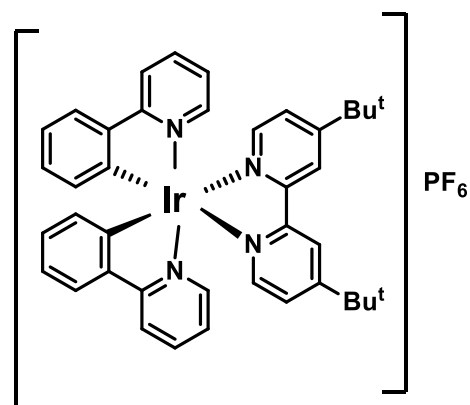

**[Ir(ppy)<sub>2</sub>(dtbbpy)]PF<sub>6</sub>**

$$E_{1/2}^{IV/III^*} = -0.96 \text{ V vs SCE}$$

$$E_{1/2}^{III^*/II} = +0.66 \text{ V vs SCE}$$

$$\tau = 0.60 \mu\text{s}$$

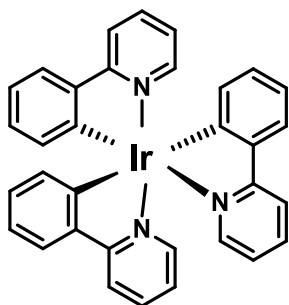

**fac-Ir(ppy)<sub>3</sub>**

$$E_{1/2}^{IV/III^*} = -1.73 \text{ V vs SCE}$$

$$E_{1/2}^{III^*/II} = +0.31 \text{ V vs SCE}$$

$$\lambda_{\text{max}} = 375 \text{ nm}$$

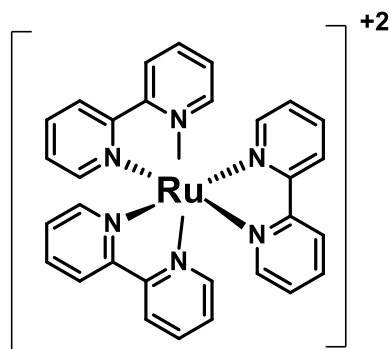

**Ru(bpy)<sub>3</sub><sup>2+</sup>**

$$E_{1/2}^{III/II^*} = -0.81 \text{ V vs SCE}$$

$$E_{1/2}^{II^*/I} = +0.77 \text{ V vs SCE}$$

$$\lambda_{\text{max}} = 452 \text{ nm}$$

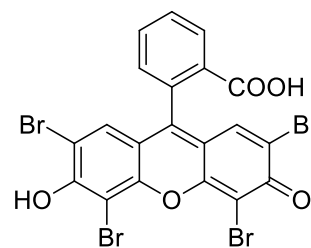

**Eosin Y**

$$E_{1/2}(\text{EY}^{\cdot+}/{}^3\text{EY}^*) = -1.11 \text{ V vs SCE}$$

$$E_{1/2}({}^3\text{EY}^*/\text{EY}^{\cdot-}) = +0.83 \text{ V vs SCE}$$

$$\lambda_{\text{max}} = 539 \text{ nm}$$

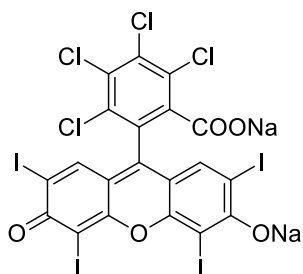

**Rose Bengal**

$$E_{1/2}(\text{RB}^{\cdot+}/{}^3\text{RB}^*) = -0.68 \text{ V vs SCE}$$

$$E_{1/2}({}^3\text{RB}^*/\text{RB}^{\cdot-}) = +0.83 \text{ V vs SCE}$$

$$\lambda_{\text{max}} = 548 \text{ nm}$$

## 9. Ipso mechanism:

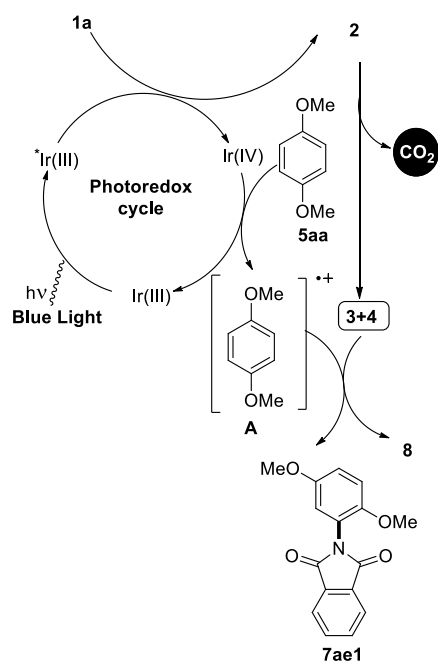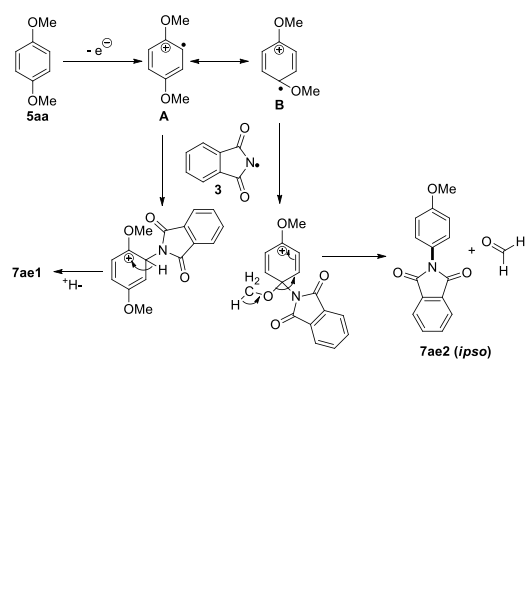

## 9. References:

1. M.S. Lowry, J.I. Gpldsmith, J. D. Slinker, R. Rohl, R. A. Pascal, G. G. Malliaras and S. Bernhard, *Chem. Mater.*, 2005, **17**, 5712.
2. G. Duret, R. Quinlan, P. Bisseret and N. Blanchard, *Chem. Sci.*, 2015, **6**, 5366.

## 6. HRMS of TEMPO adduct (From Reaction mixture) -

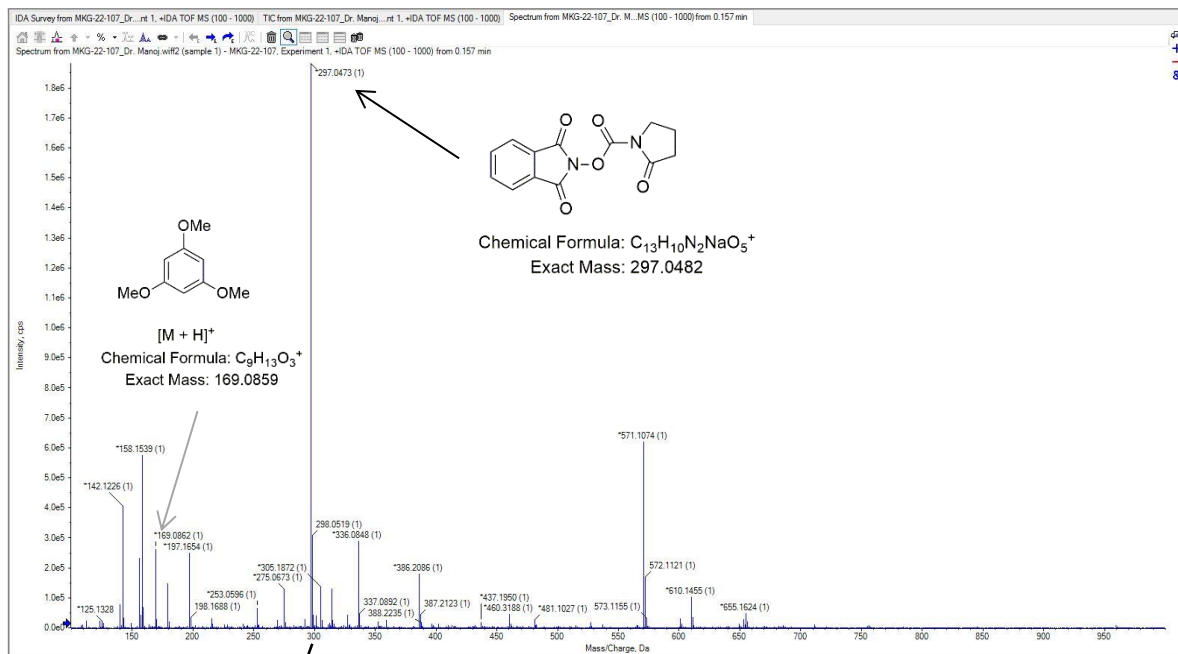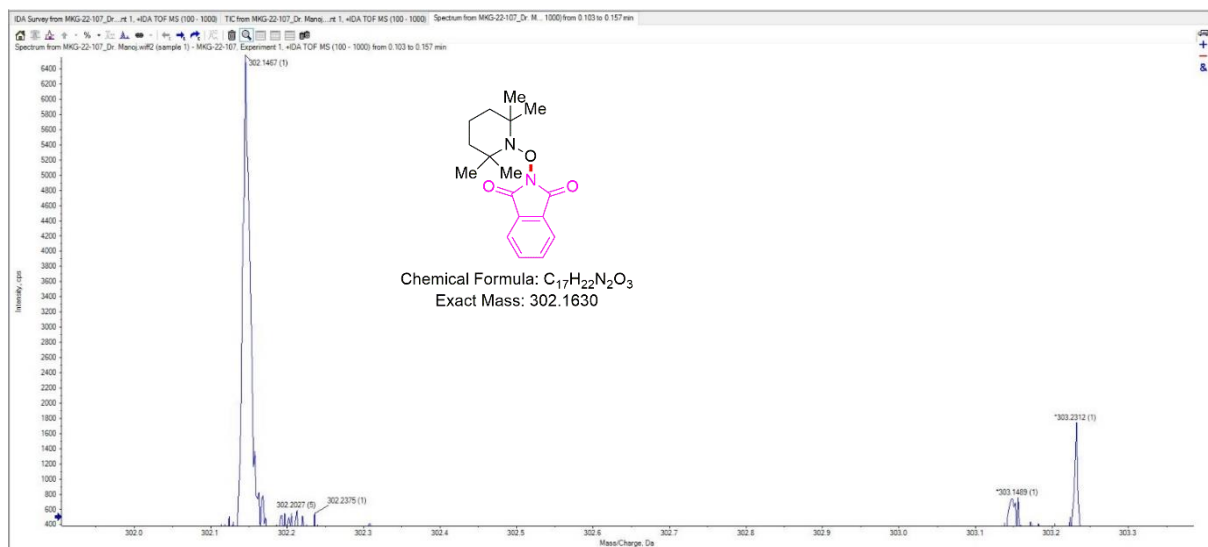

## 7. HRMS of BHT adduct (From reaction mixture)–

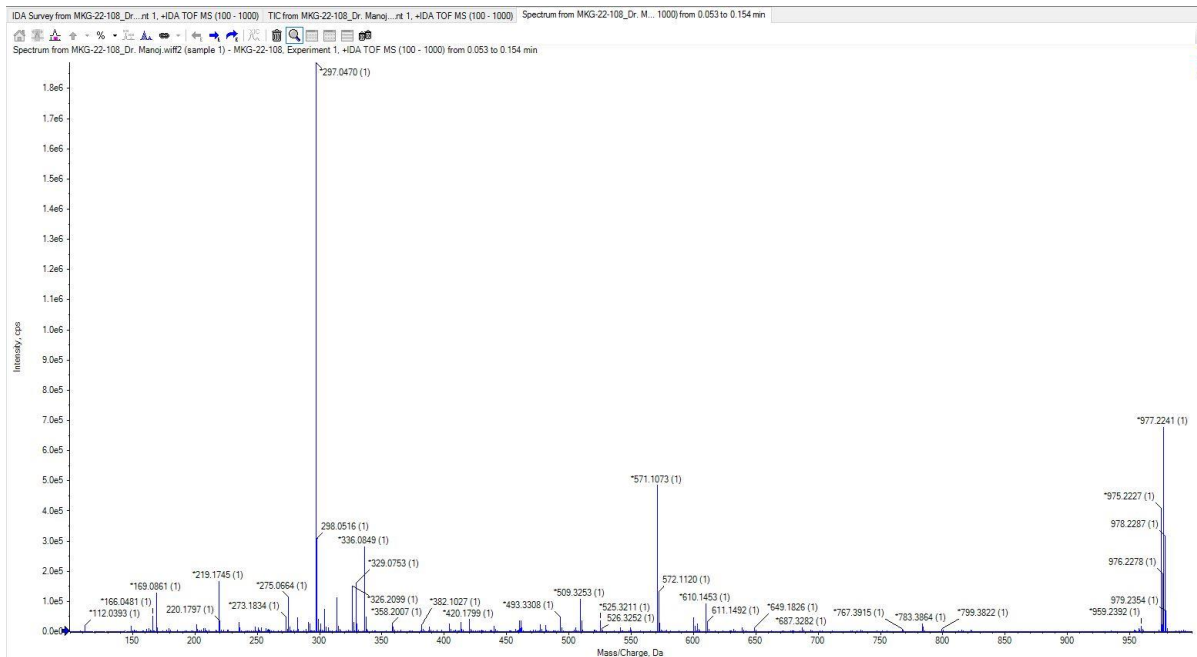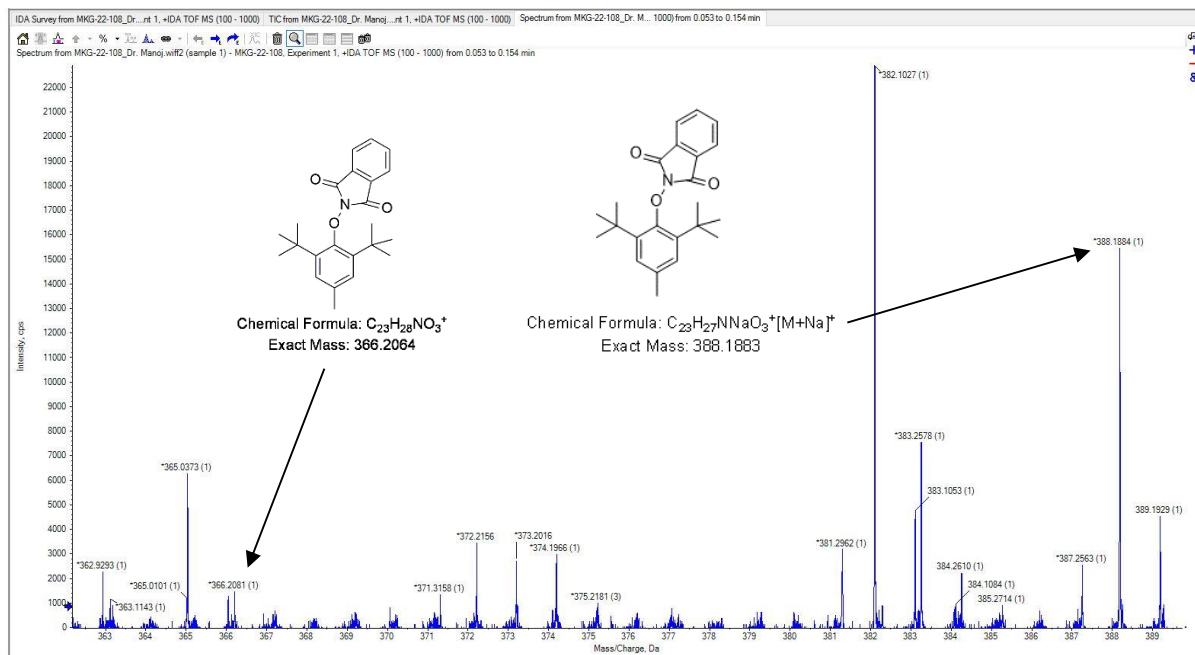

## Mechanistic Support: HRMS data of the Reaction Mixture after 12h from reaction time

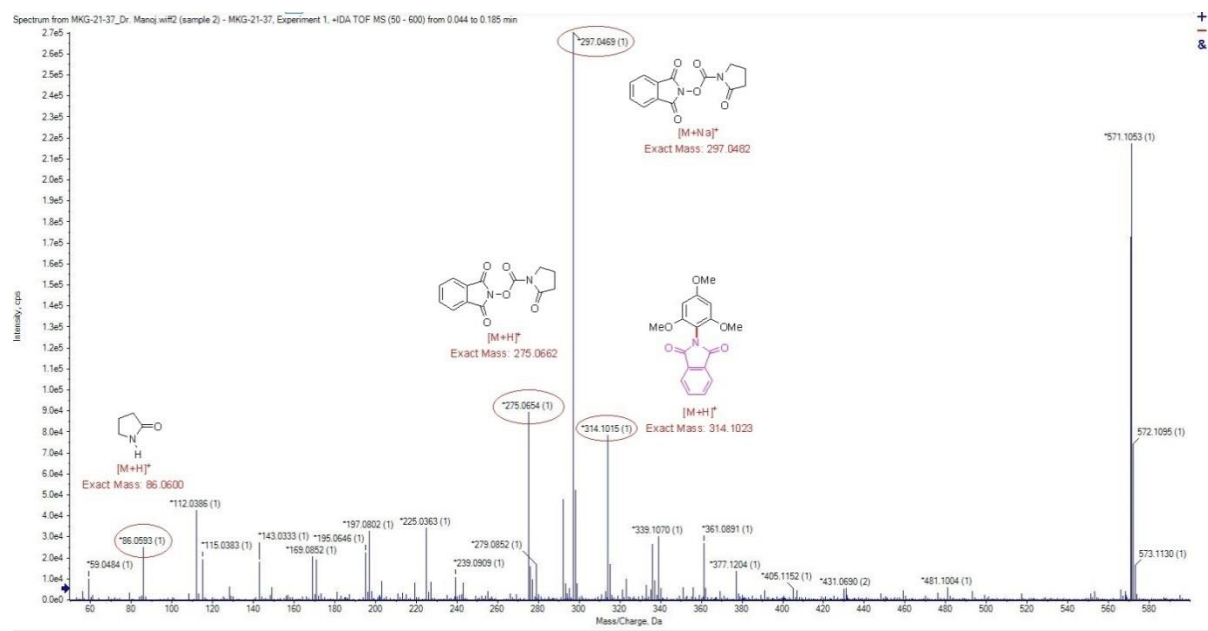

## Controlled Experiment: HRMS data of the radical trapping experiment

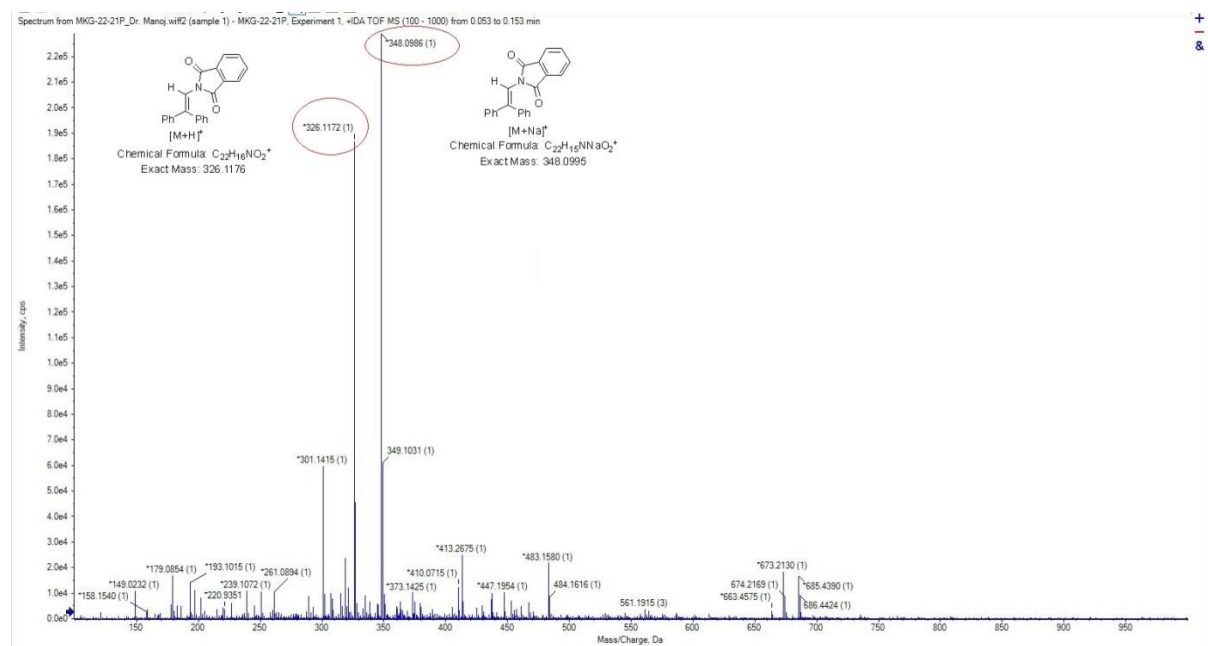

7.909  
7.903  
7.894  
7.810  
7.802

7.260

4.029  
4.015  
4.001

2.638  
2.622  
2.606  
2.218  
2.203  
2.187  
2.173  
2.157

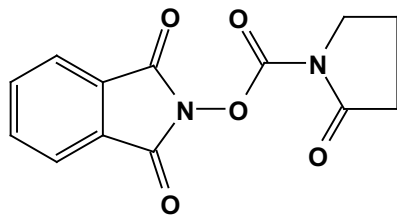

**1a**

<sup>1</sup>H NMR (500 MHz, CDCl<sub>3</sub>)

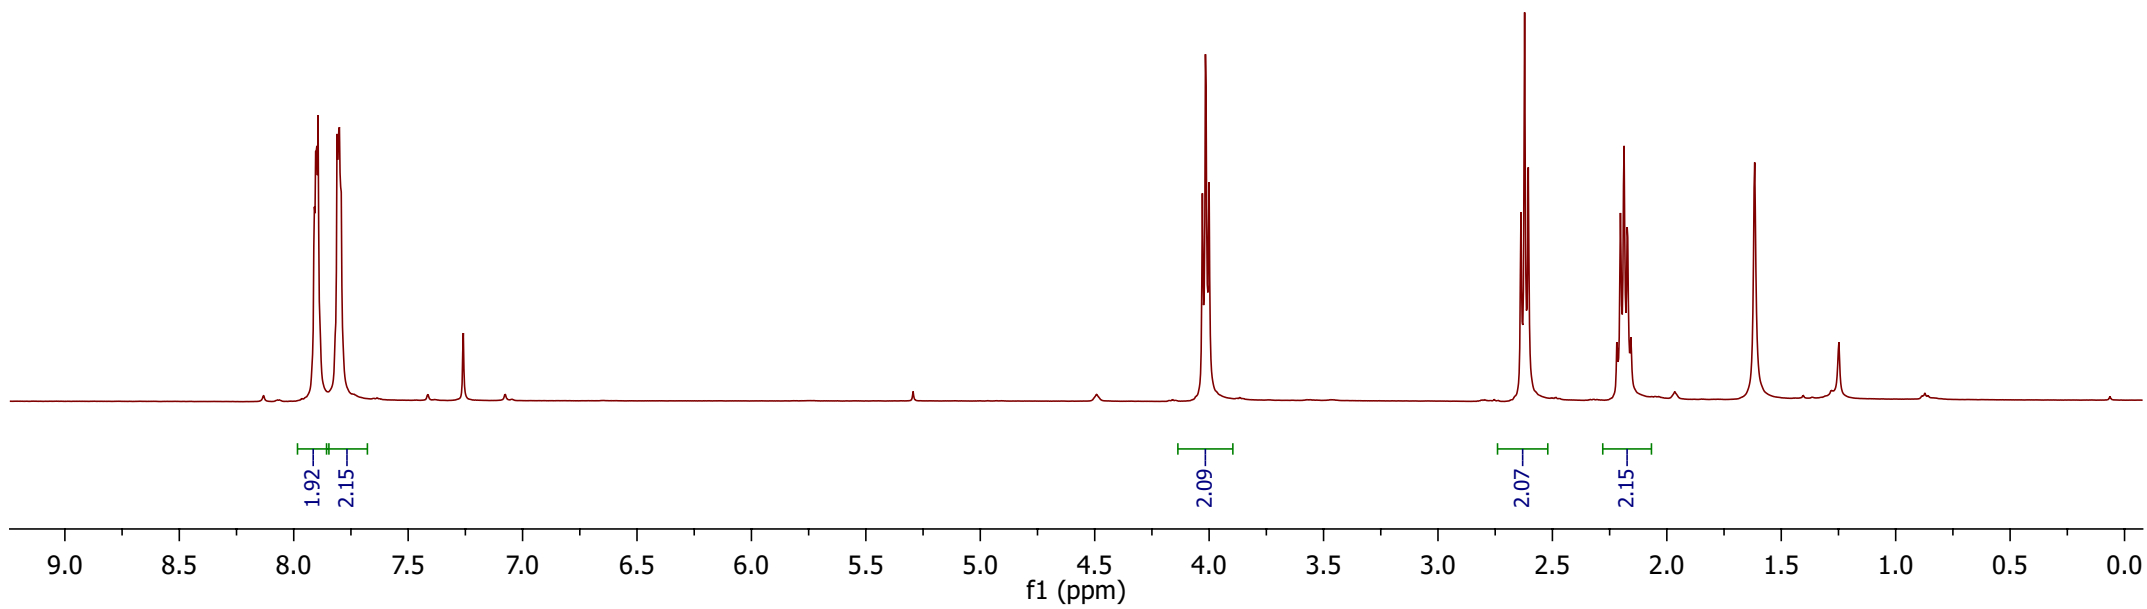

—173.424

—161.790

—148.232

—135.047

—128.947

—124.259

—77.415

—77.160

—76.907

—46.600

—32.145

—18.085

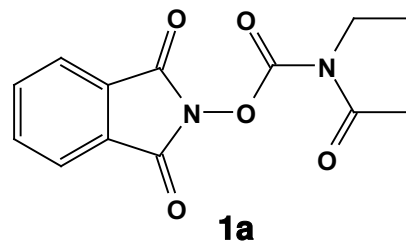

<sup>13</sup>C NMR (125 MHz, CDCl<sub>3</sub>)

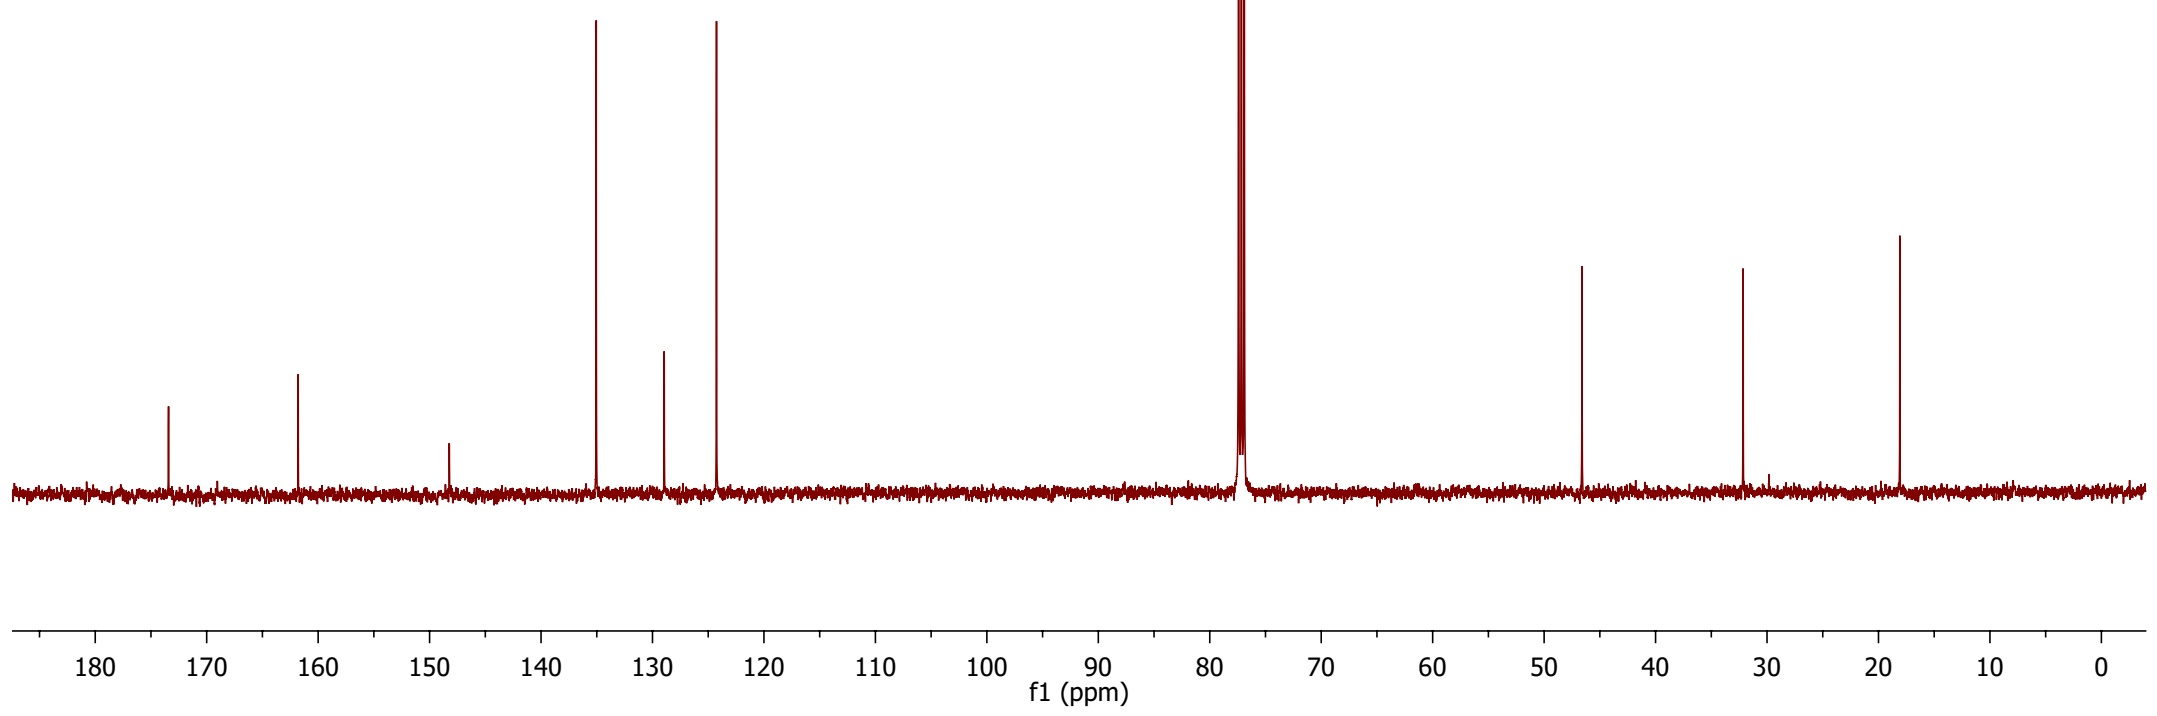

7.876  
7.866  
7.858  
7.769  
7.761  
7.751  
7.260

3.645  
3.471

1.651

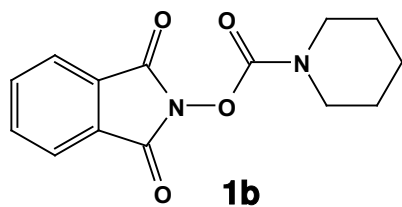

<sup>1</sup>H NMR (500 MHz, CDCl<sub>3</sub>)

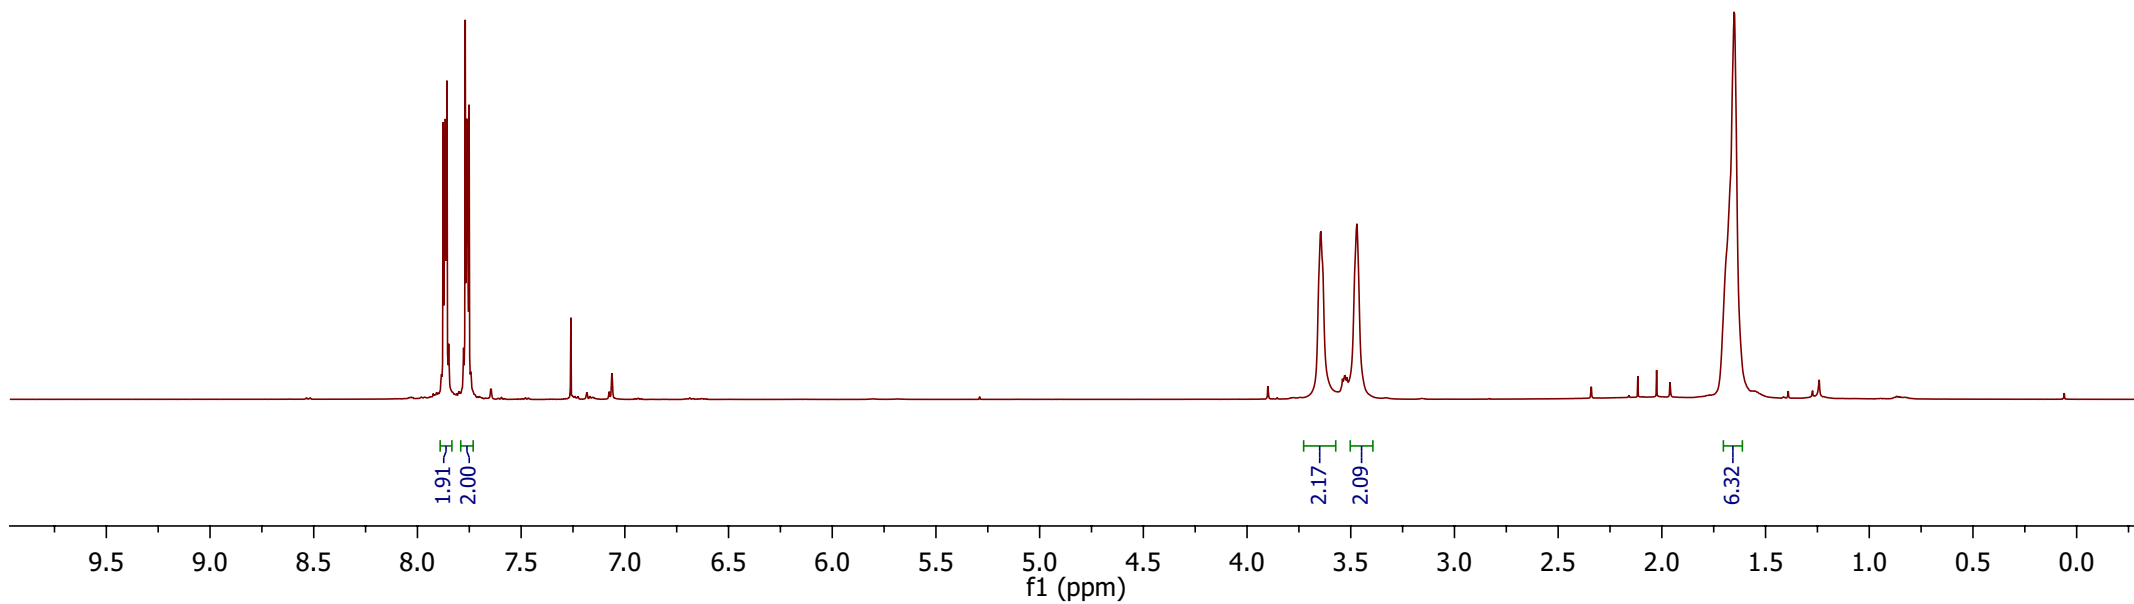



162.849

151.431

134.715

129.185

123.954

77.414  
77.160  
76.905

46.520  
45.793

25.663  
25.342  
24.059

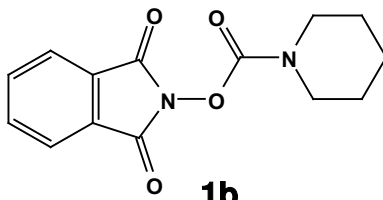

<sup>13</sup>C NMR (125 MHz, CDCl<sub>3</sub>)

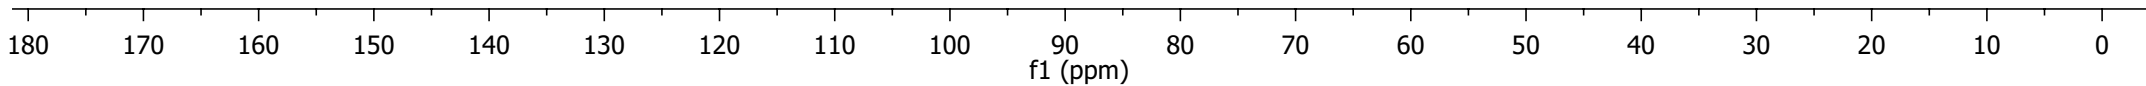

7.892  
7.882  
7.873  
7.866  
7.795  
7.788  
7.780  
7.769  
— 7.260

3.773  
3.727  
3.544

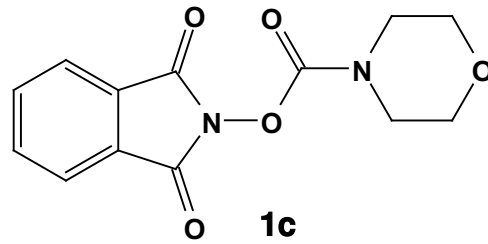

<sup>1</sup>H NMR (500 MHz, CDCl<sub>3</sub>)

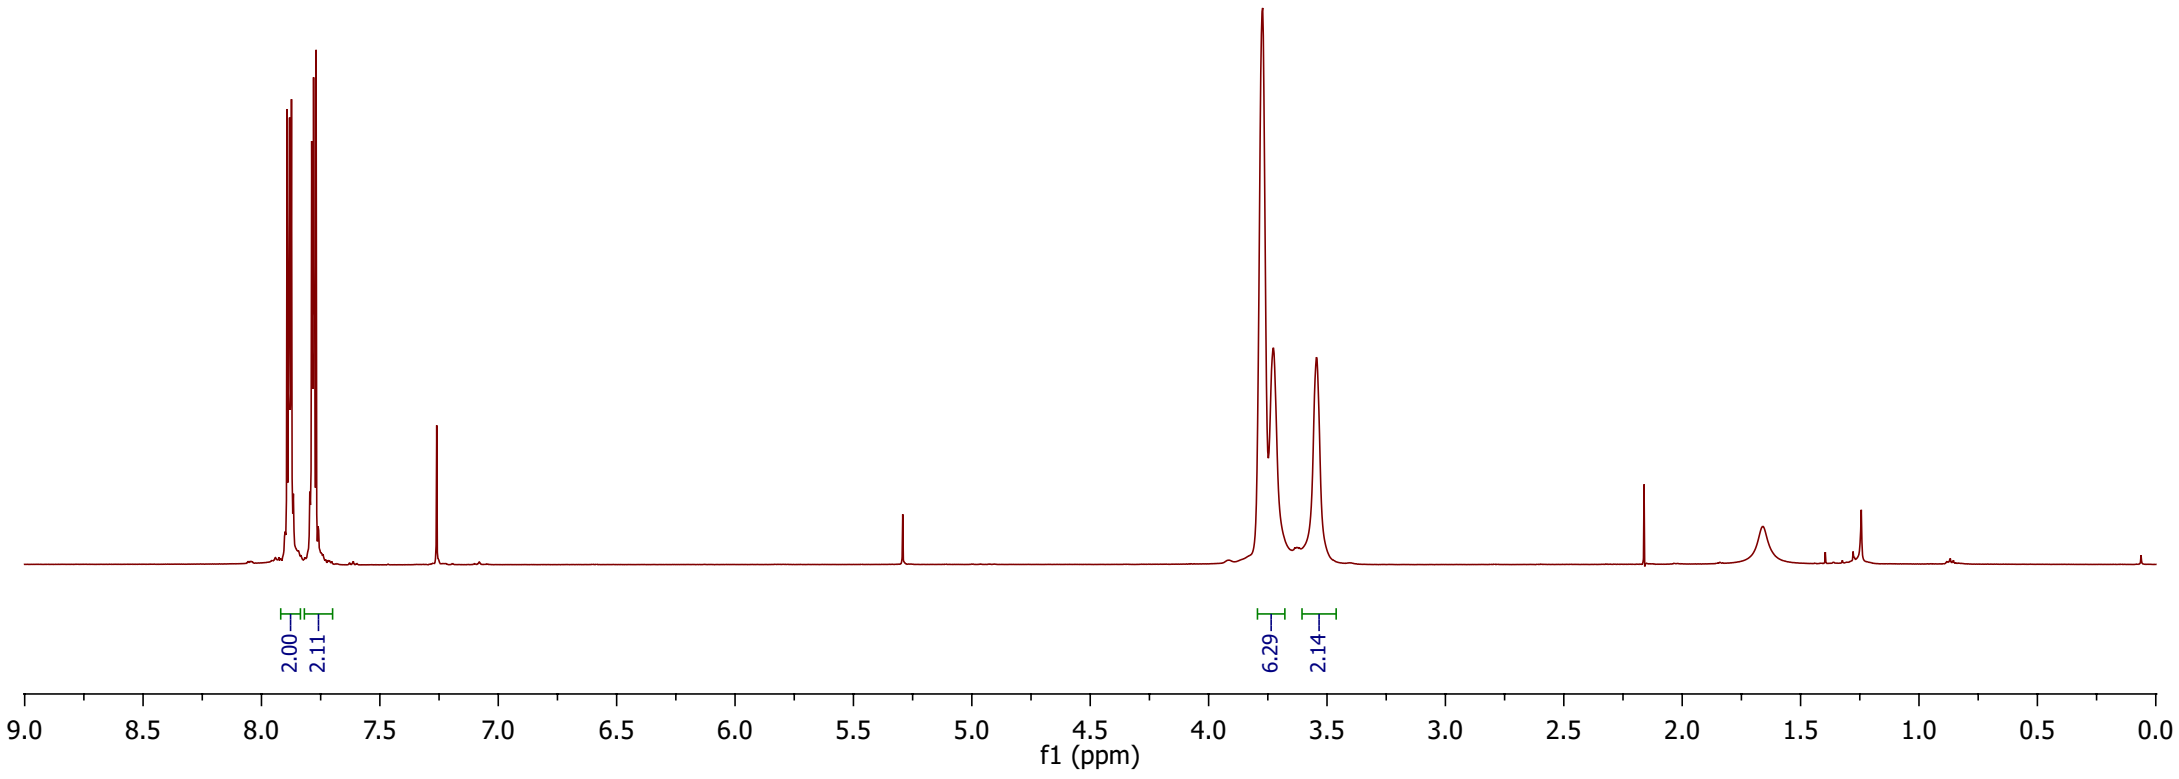

—162.35

—151.19

—134.60

—128.83

—123.82

77.16  
76.91  
76.65

66.19  
66.01

44.89  
44.84

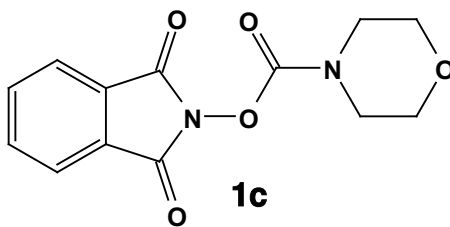

<sup>13</sup>C NMR (125 MHz, CDCl<sub>3</sub>)

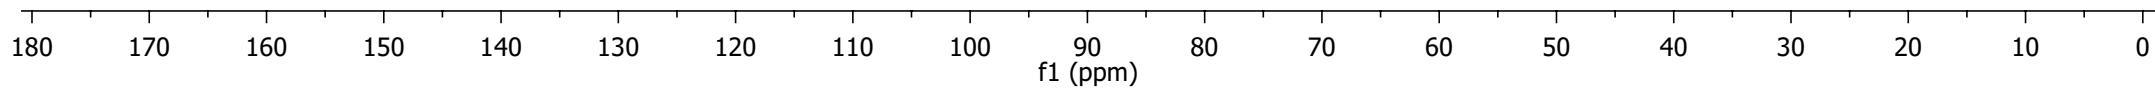

—7.248

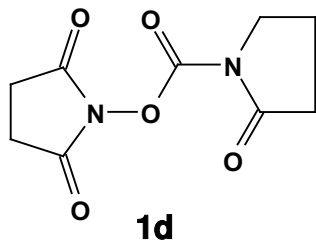

<sup>1</sup>H NMR (500 MHz, CDCl<sub>3</sub>)

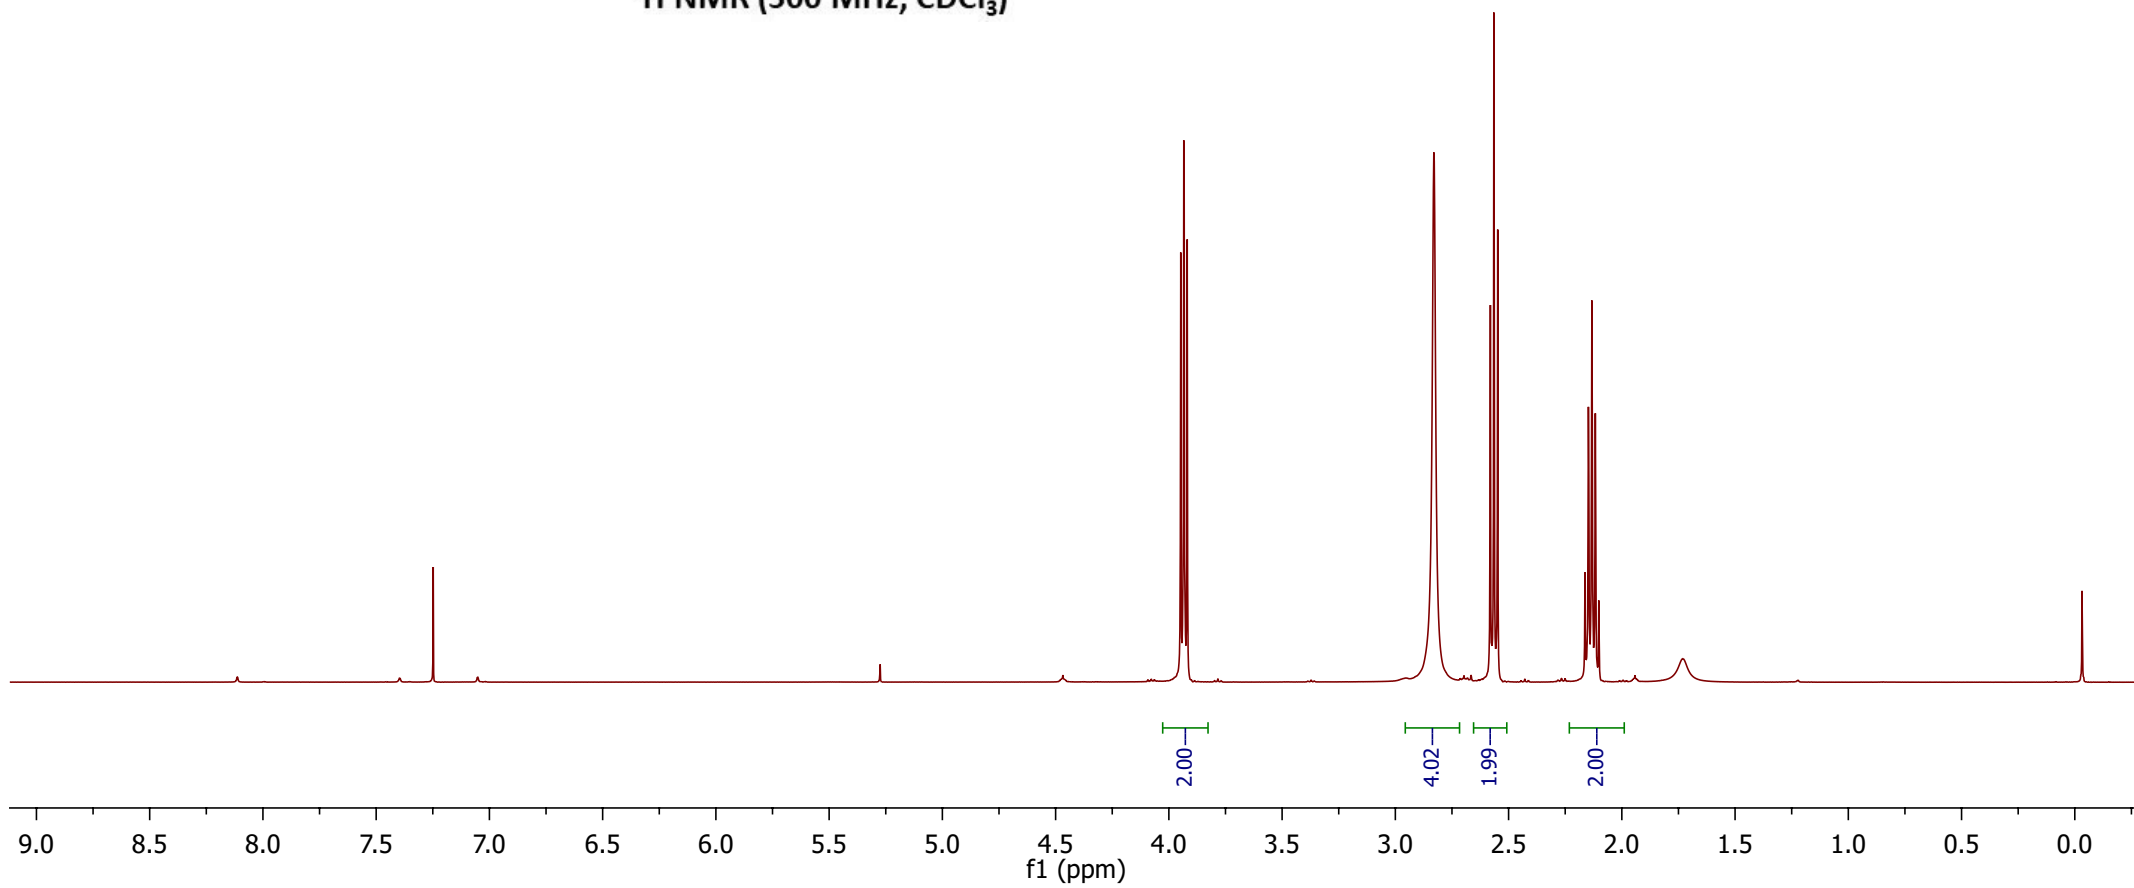

—173.461

—168.990

—147.257

77.416  
77.160  
76.905

—46.474

—32.047

—25.620

—17.981

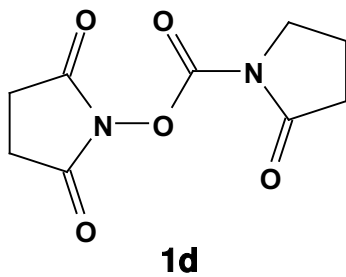

<sup>13</sup>C NMR (125 MHz, CDCl<sub>3</sub>)

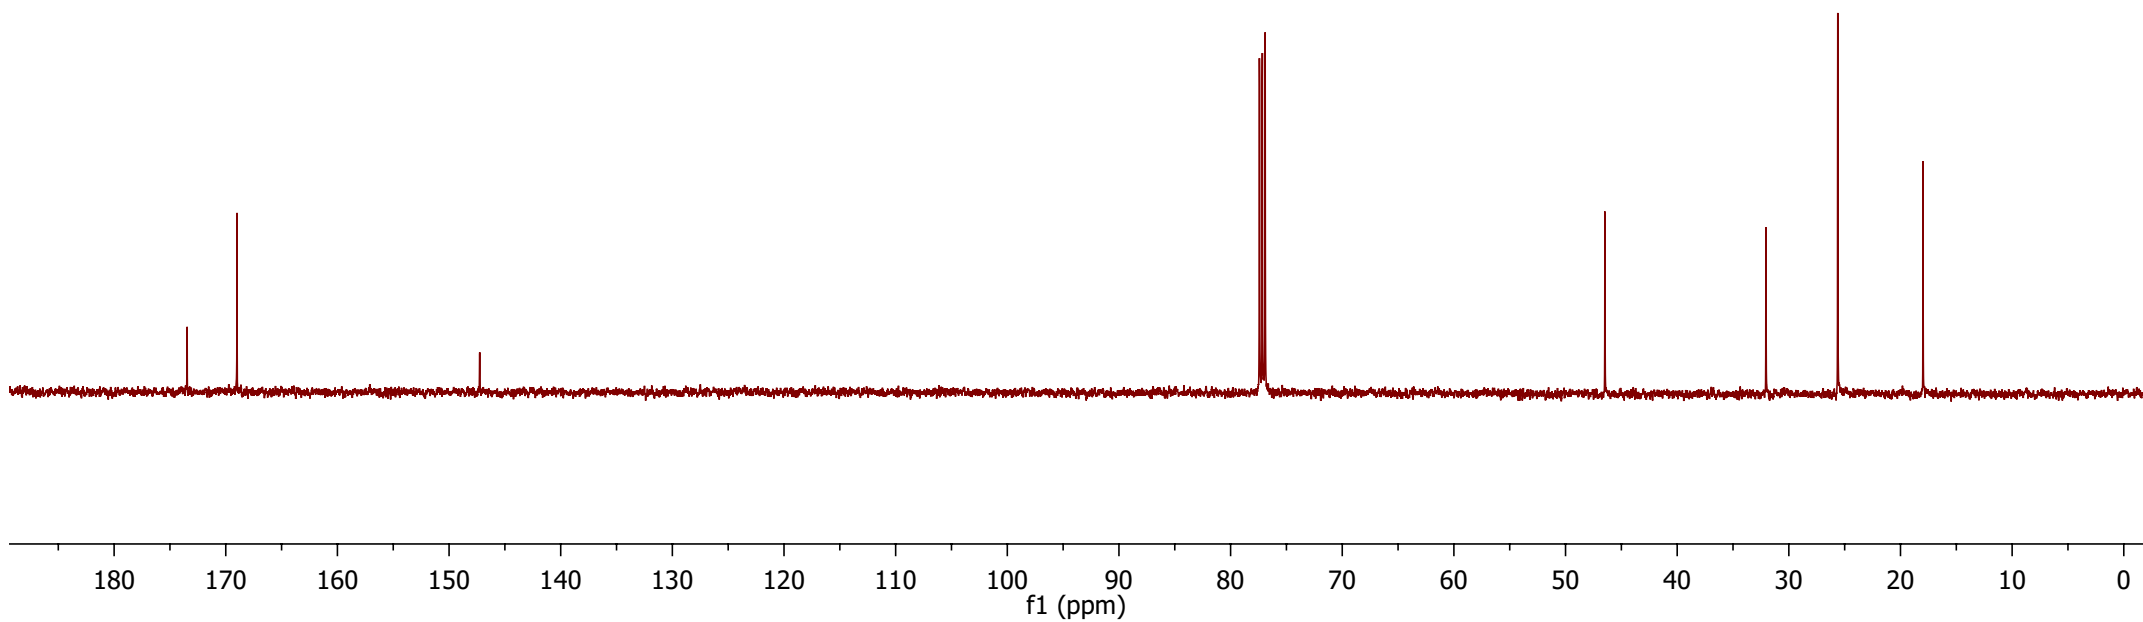

7.897  
7.887  
7.879  
7.798  
7.790  
7.780  
7.260

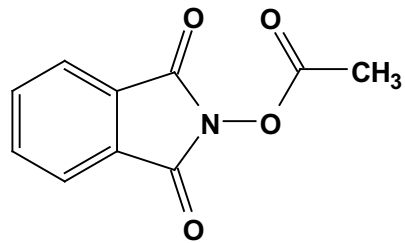

**1e**

<sup>1</sup>H NMR (500 MHz, CDCl<sub>3</sub>)

2.397

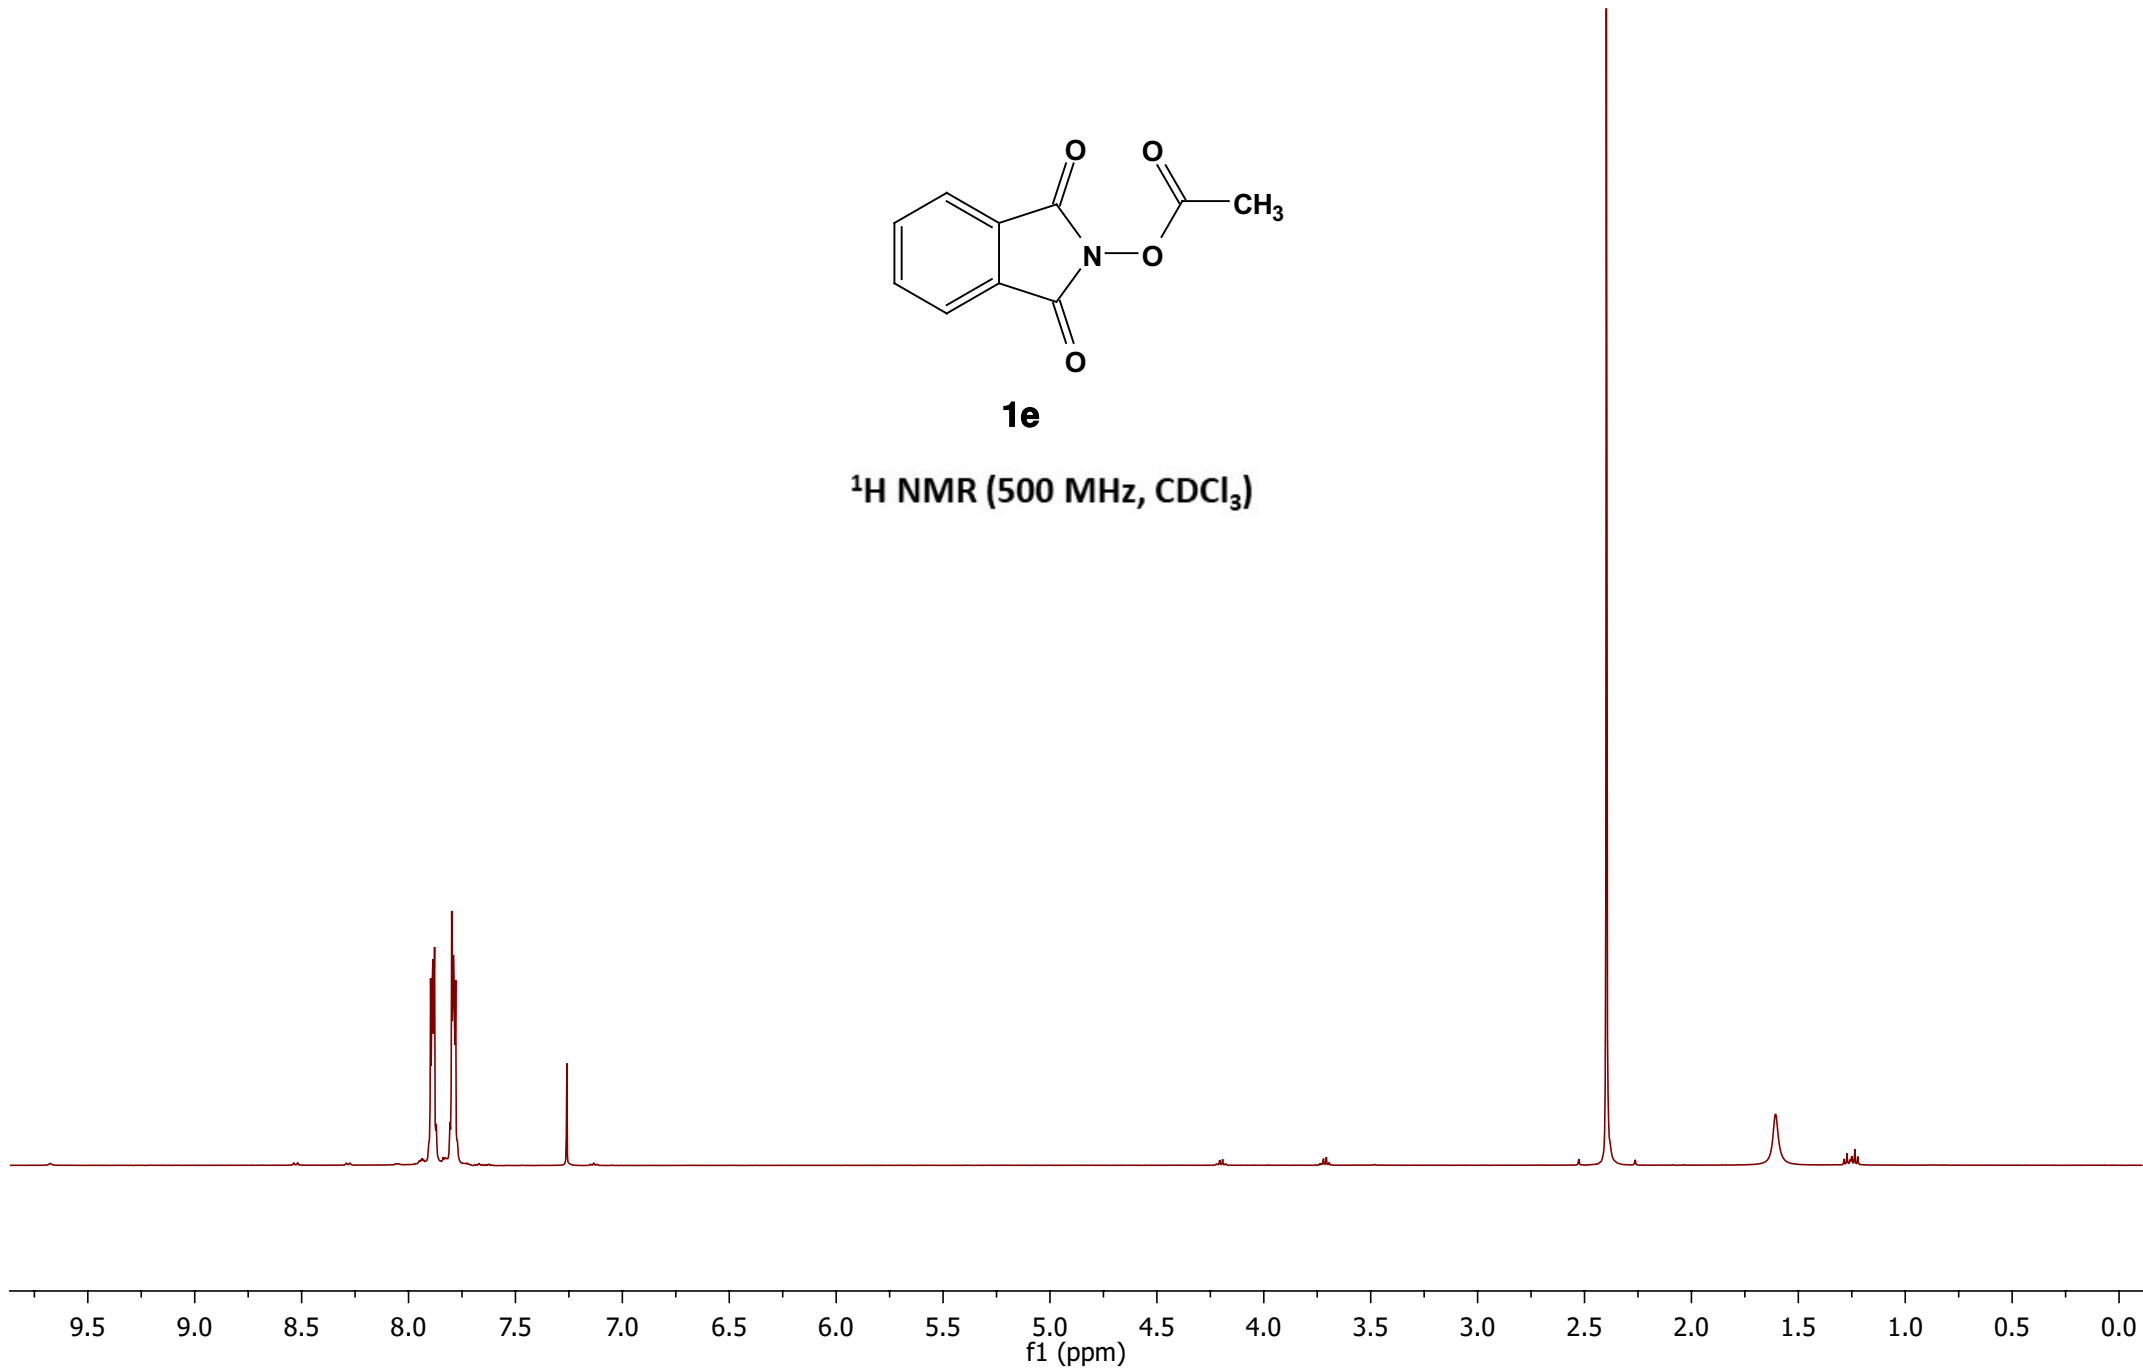

—166.683  
—162.035

—134.912  
—129.058  
—124.136

77.414  
77.160  
76.907

—17.749

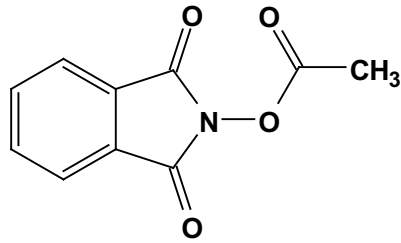

**1e**

<sup>13</sup>C NMR (125 MHz, CDCl<sub>3</sub>)

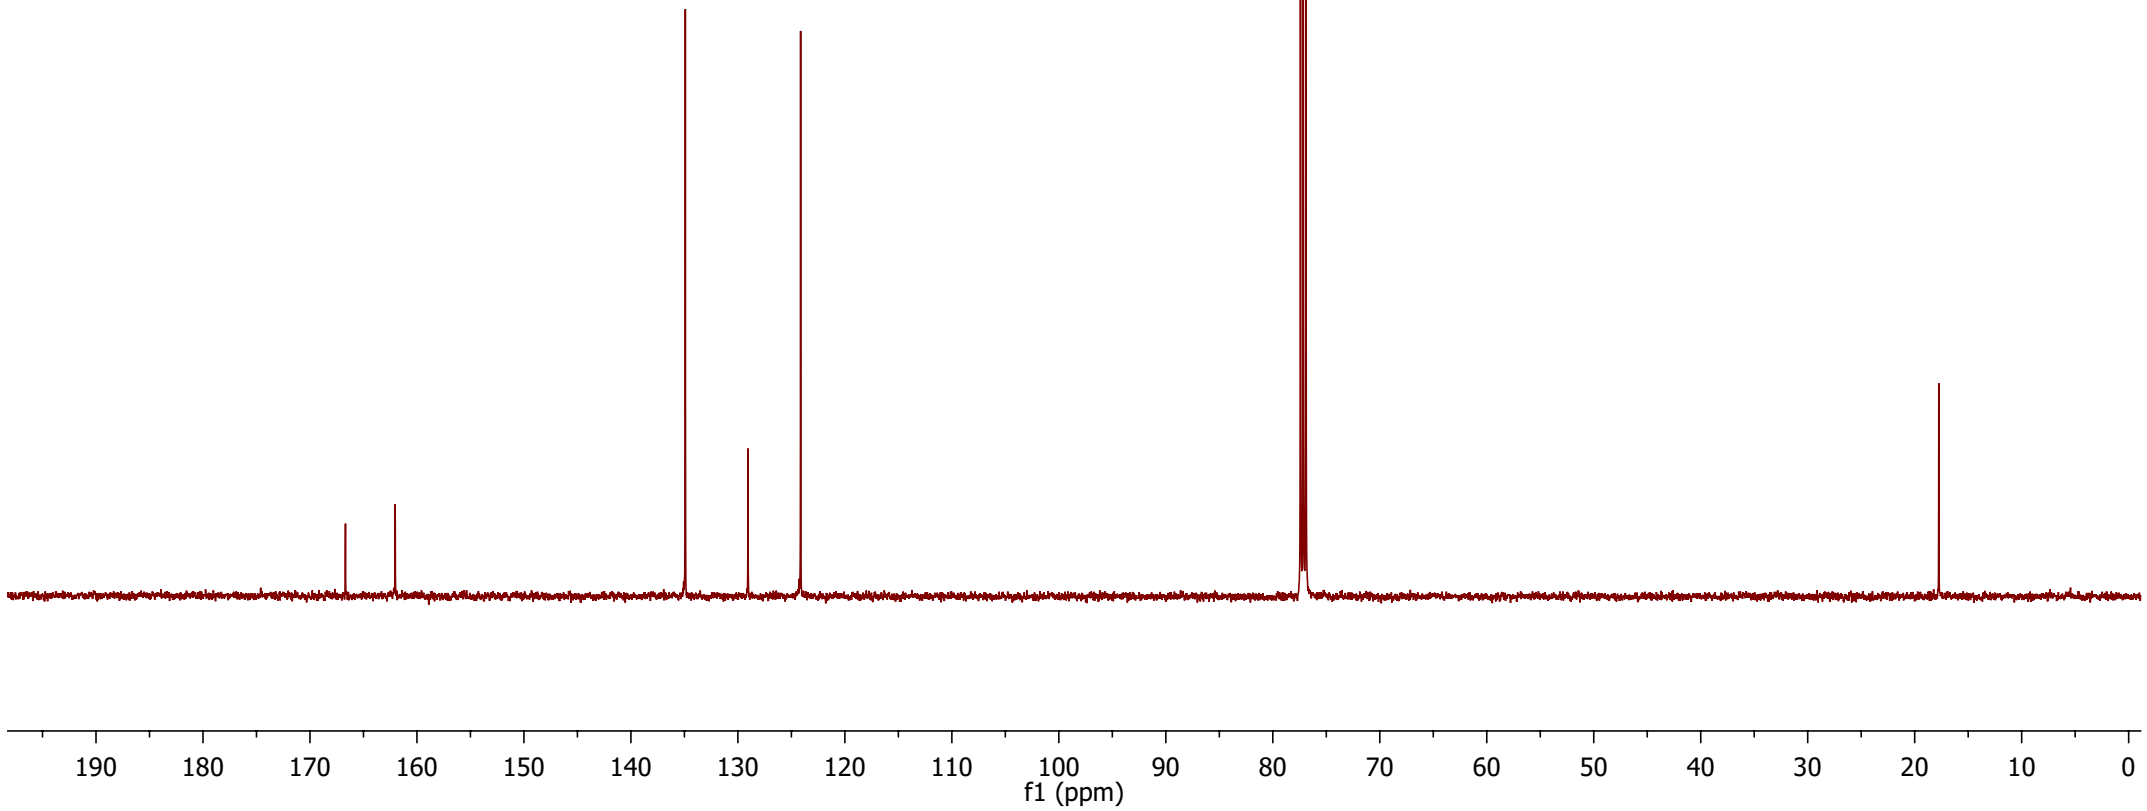

7.773  
7.758  
7.690  
7.584  
7.569  
7.260

4.015  
4.001  
3.986

2.623  
2.607  
2.591  
2.519  
2.204  
2.188  
2.173  
2.158  
2.143

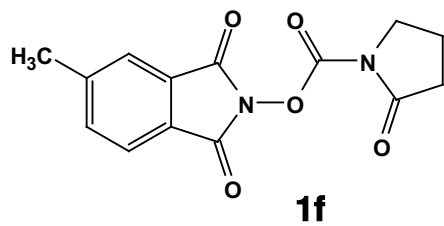

<sup>1</sup>H NMR (500 MHz, CDCl<sub>3</sub>)

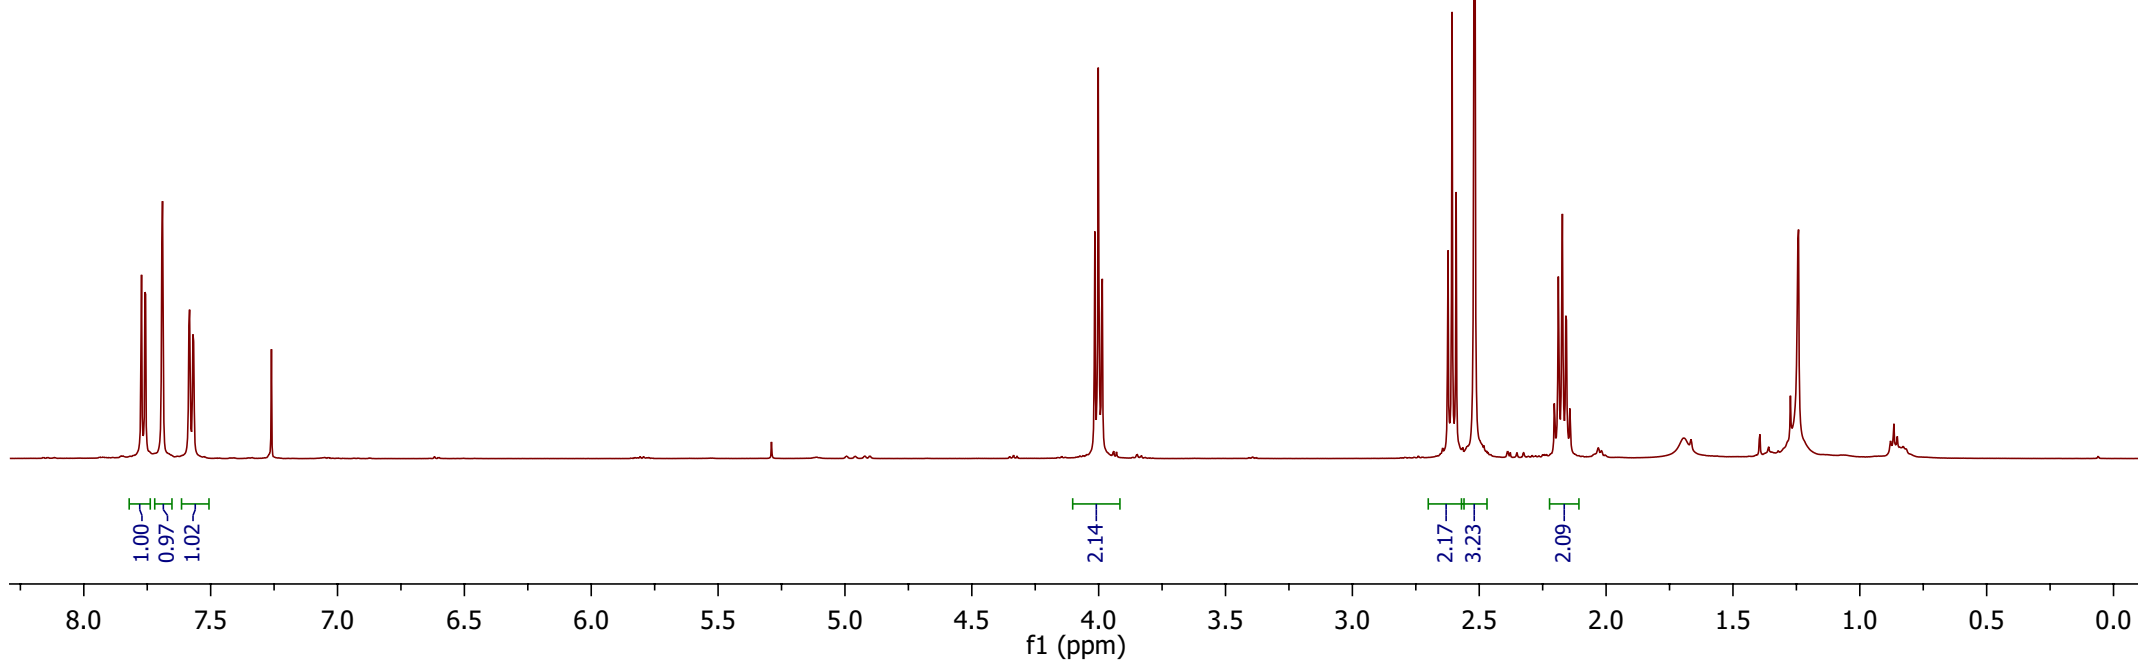



173.425  
162.014  
161.881  
148.217  
146.542  
135.488  
129.107  
126.123  
124.710  
124.147  
77.367  
77.113  
76.859  
46.523  
32.078  
22.233  
18.003

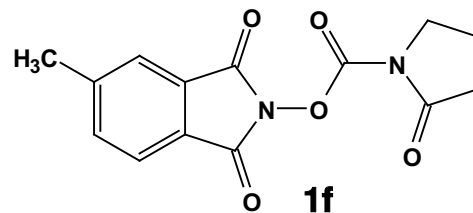

<sup>13</sup>C NMR (125 MHz, CDCl<sub>3</sub>)

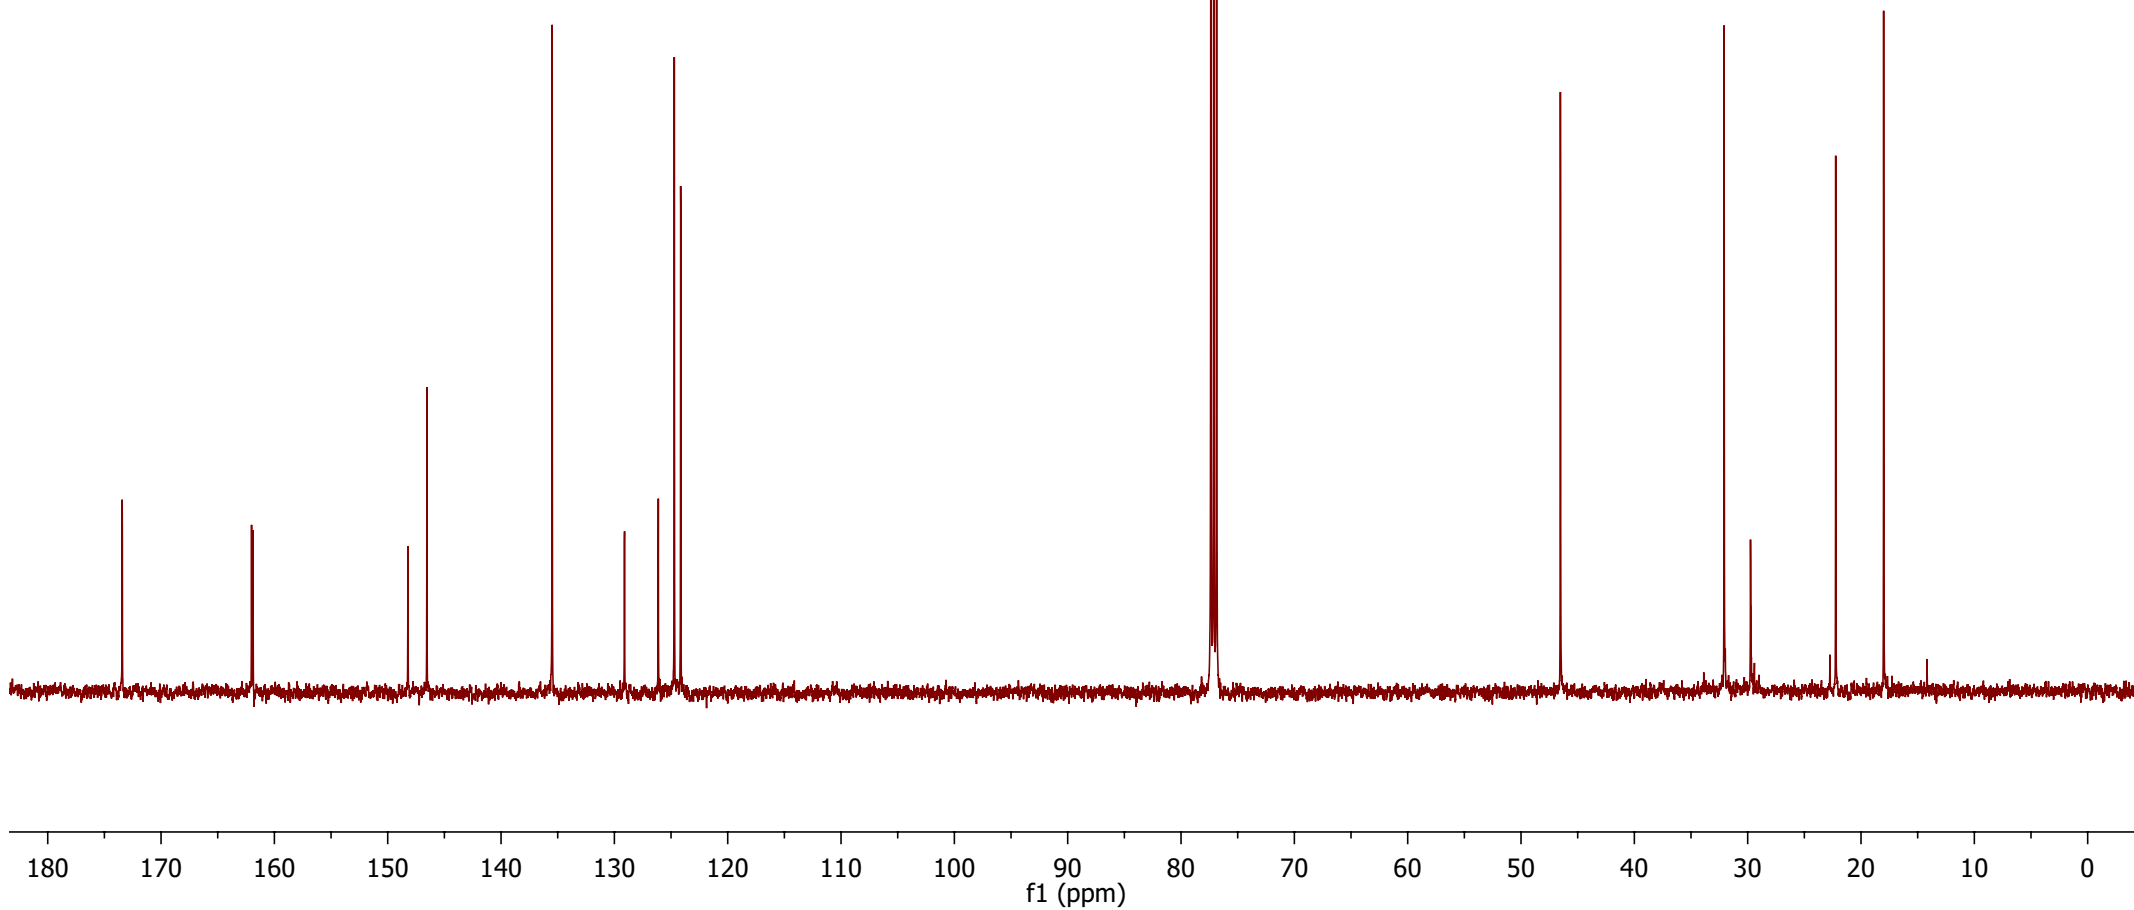

7.881  
7.857  
7.841  
7.779  
7.763

7.260

4.025  
4.009  
3.995

2.643  
2.627  
2.611  
2.225  
2.209  
2.194  
2.179  
2.163

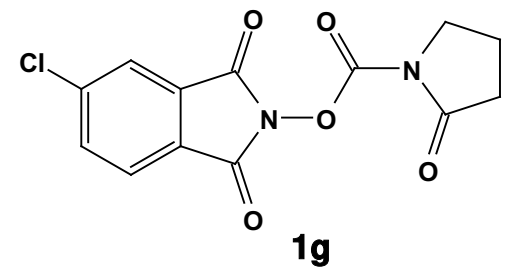

<sup>1</sup>H NMR (500 MHz, CDCl<sub>3</sub>)

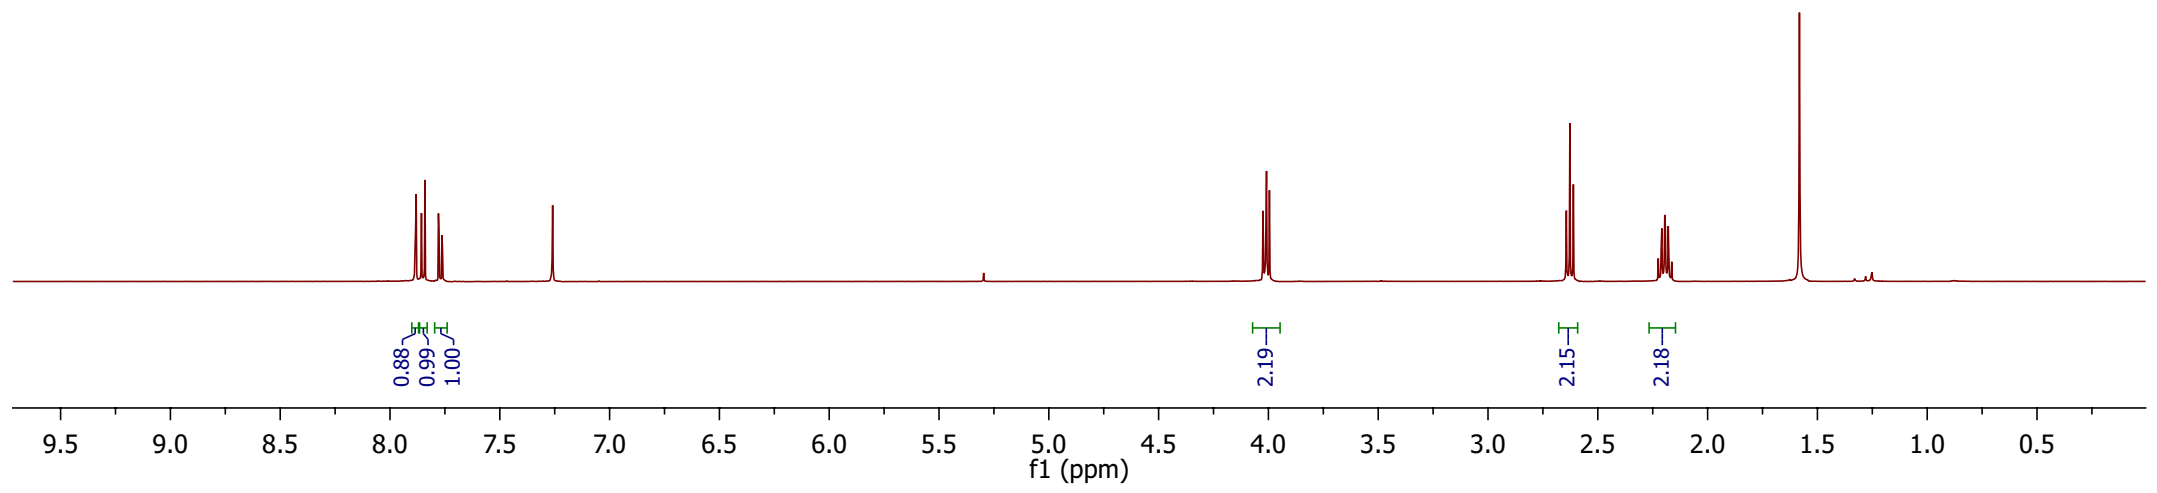

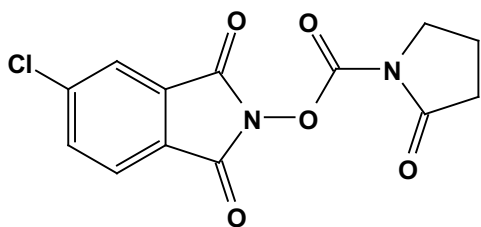

**1g**

**<sup>13</sup>C NMR (125 MHz, CDCl<sub>3</sub>)**

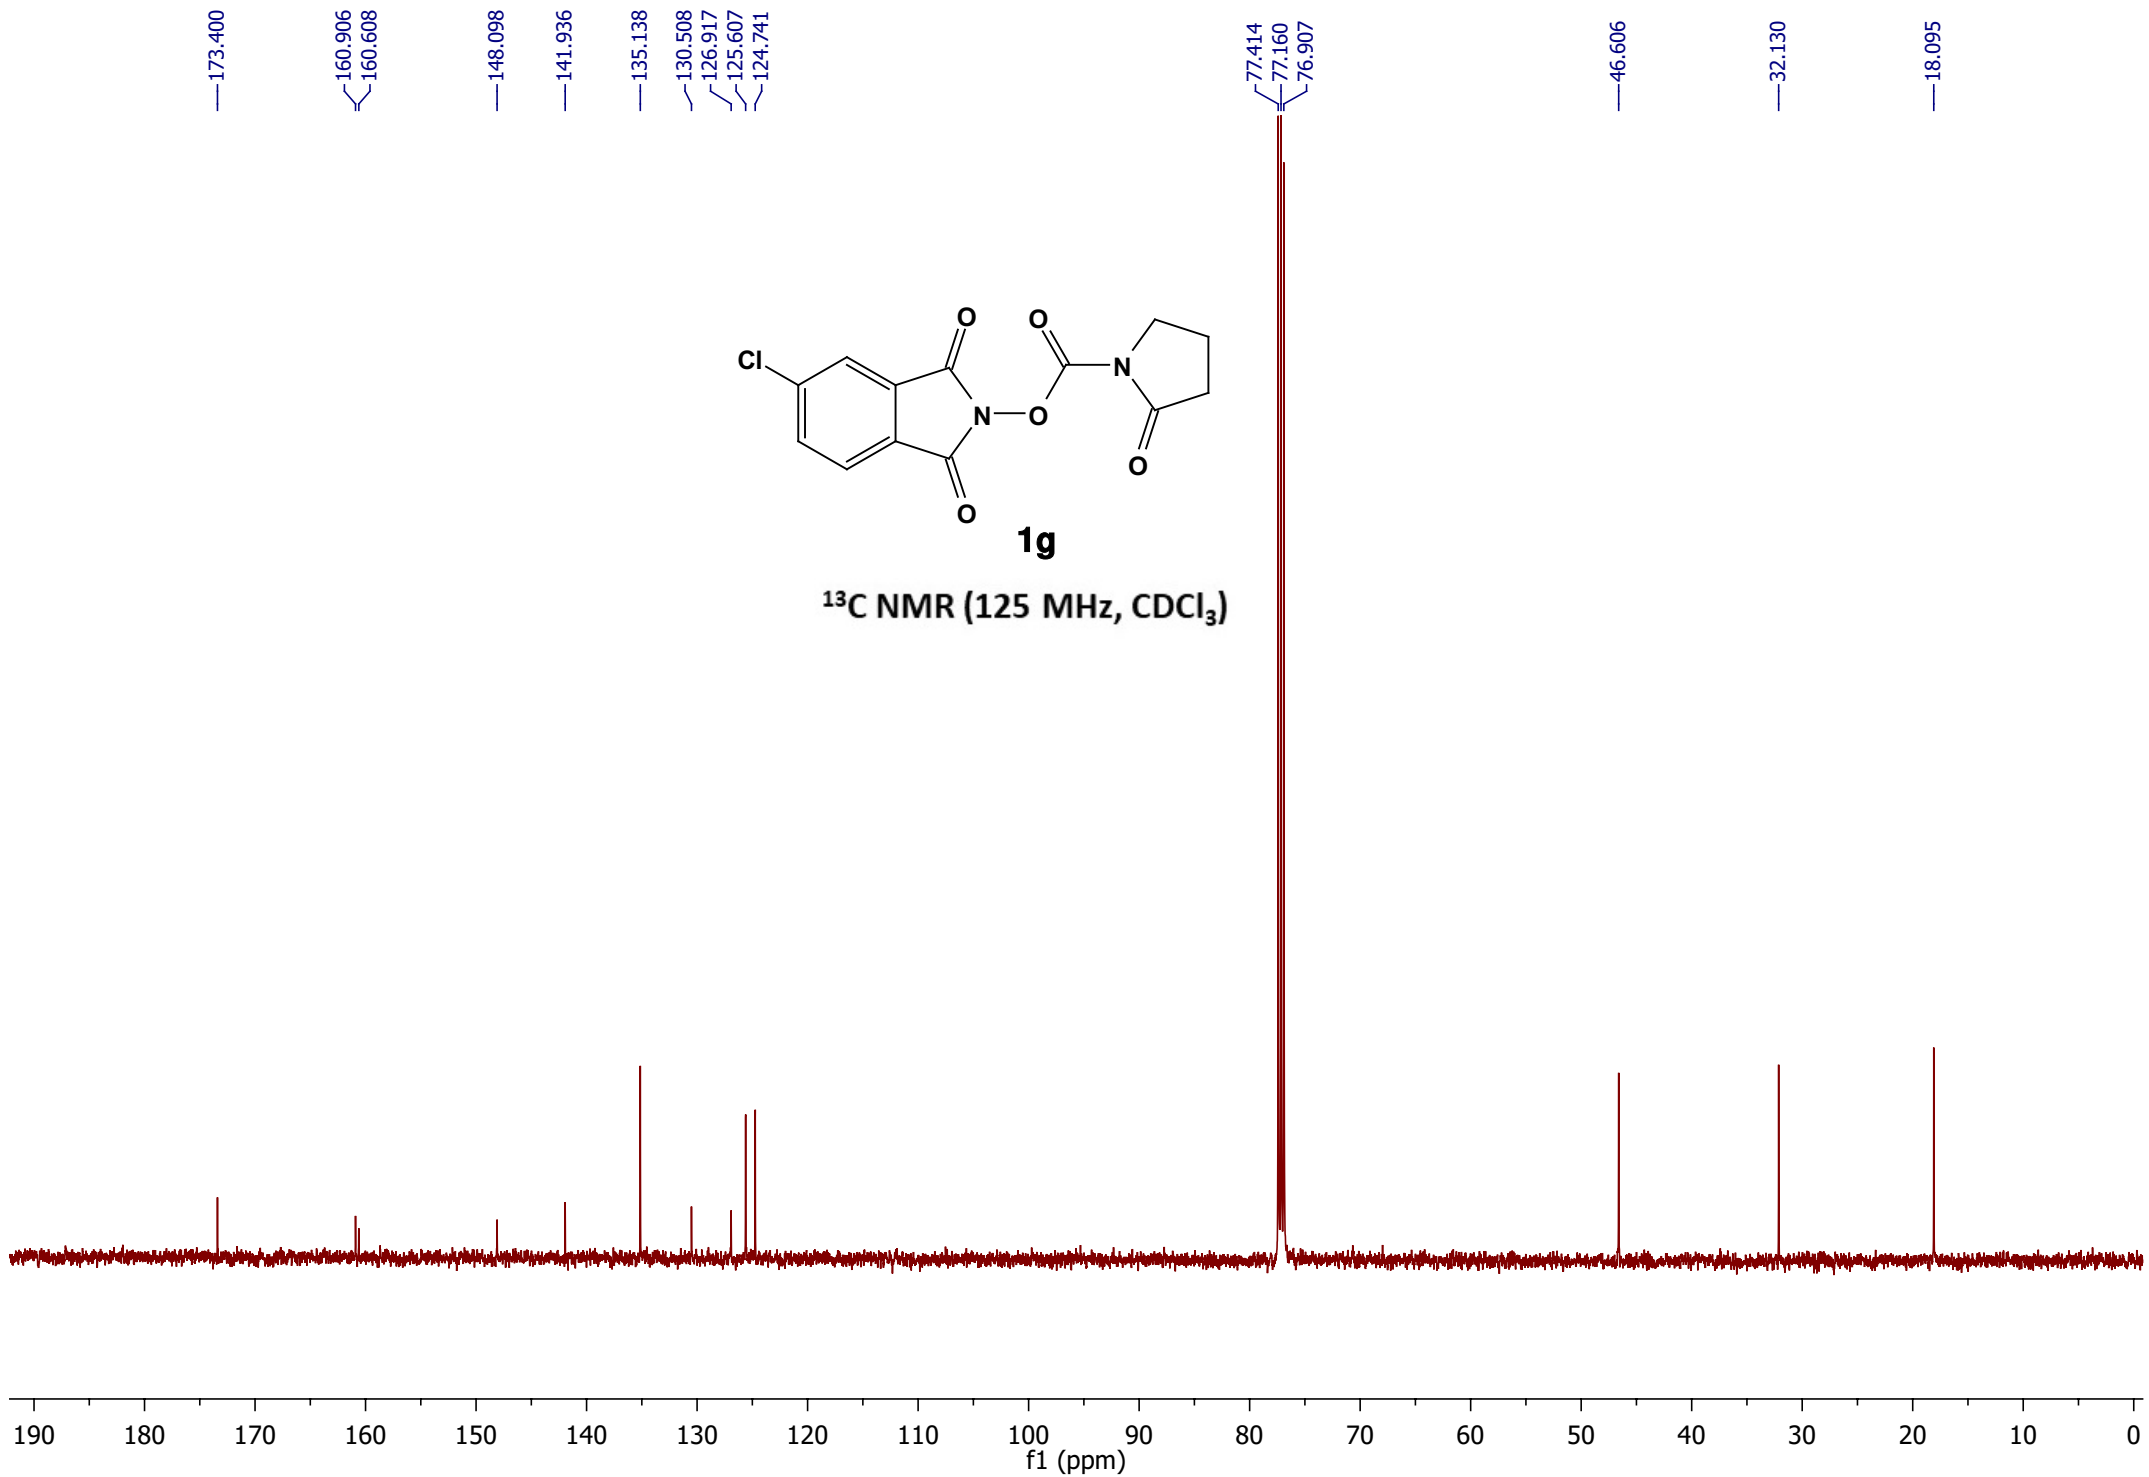

8.038  
7.953  
7.937  
7.775  
7.759

7.260

4.020  
4.004  
3.991

2.639  
2.623  
2.607  
2.220  
2.204  
2.189  
2.174  
2.159

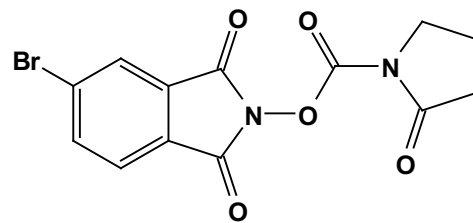

**1h**

<sup>1</sup>H NMR (500 MHz, CDCl<sub>3</sub>)

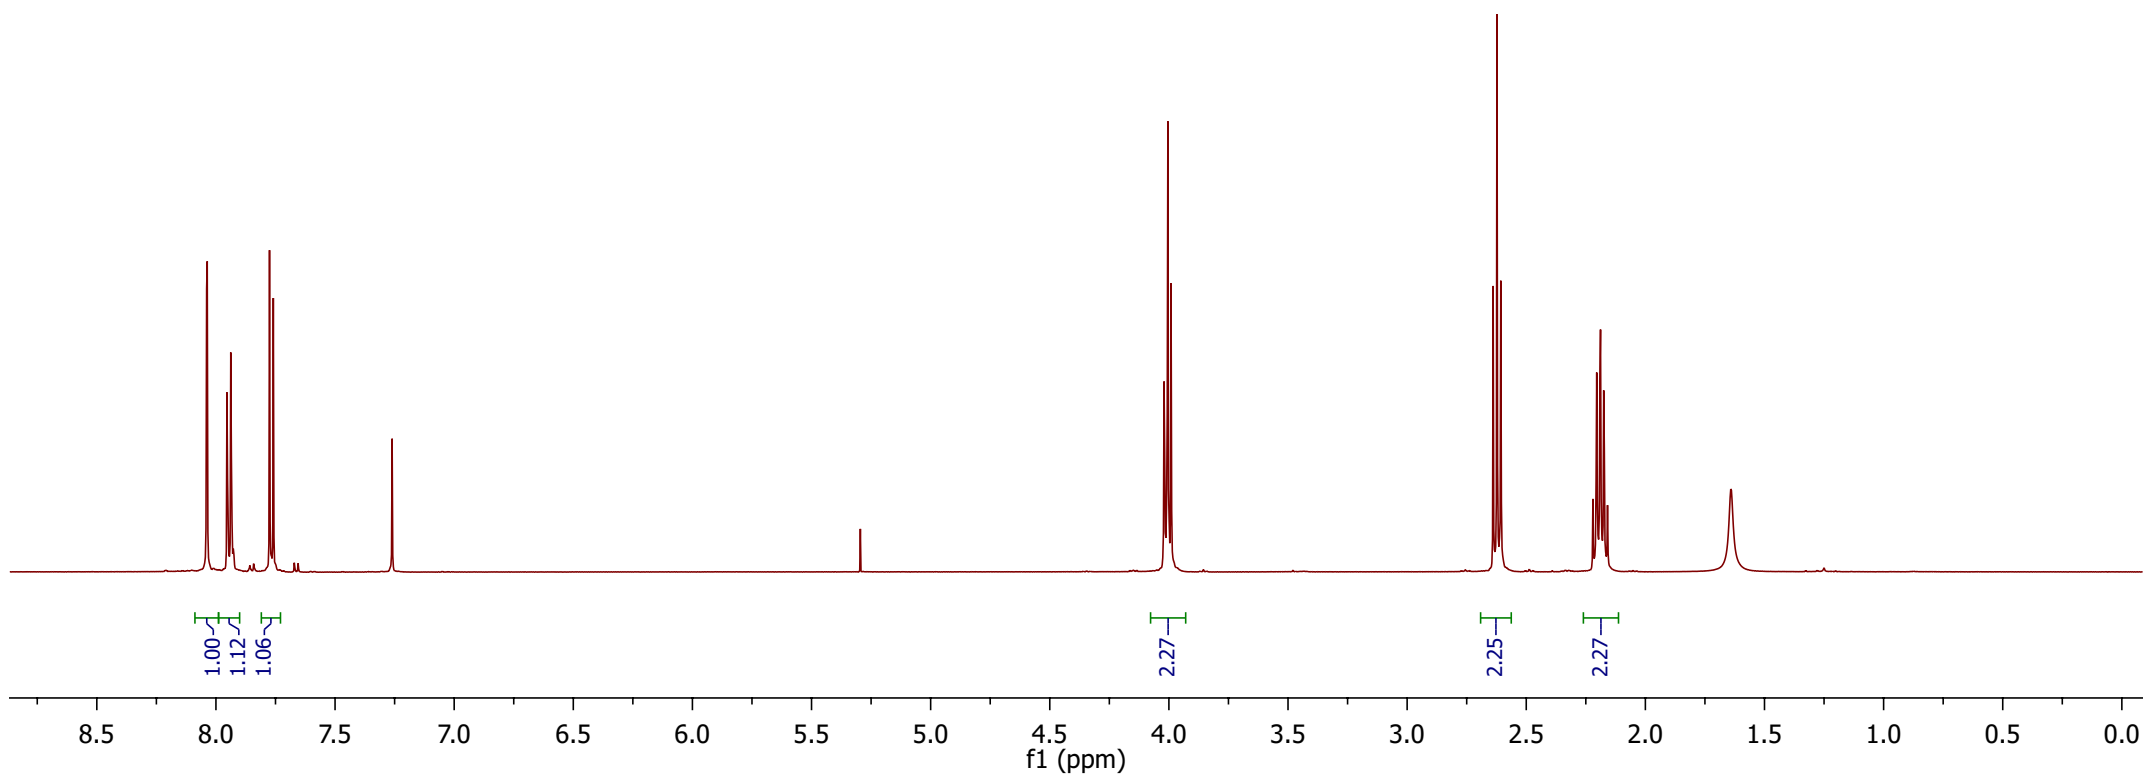

—173.417

—161.037  
—160.491

—148.082

—138.104

—130.412  
—130.109  
—127.594  
—127.365  
—125.640

—77.414  
—77.160  
—76.907

—46.603

—32.114

—18.080

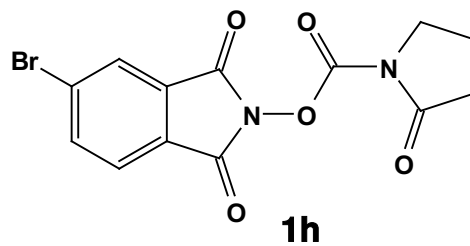

<sup>13</sup>C NMR (125 MHz, CDCl<sub>3</sub>)

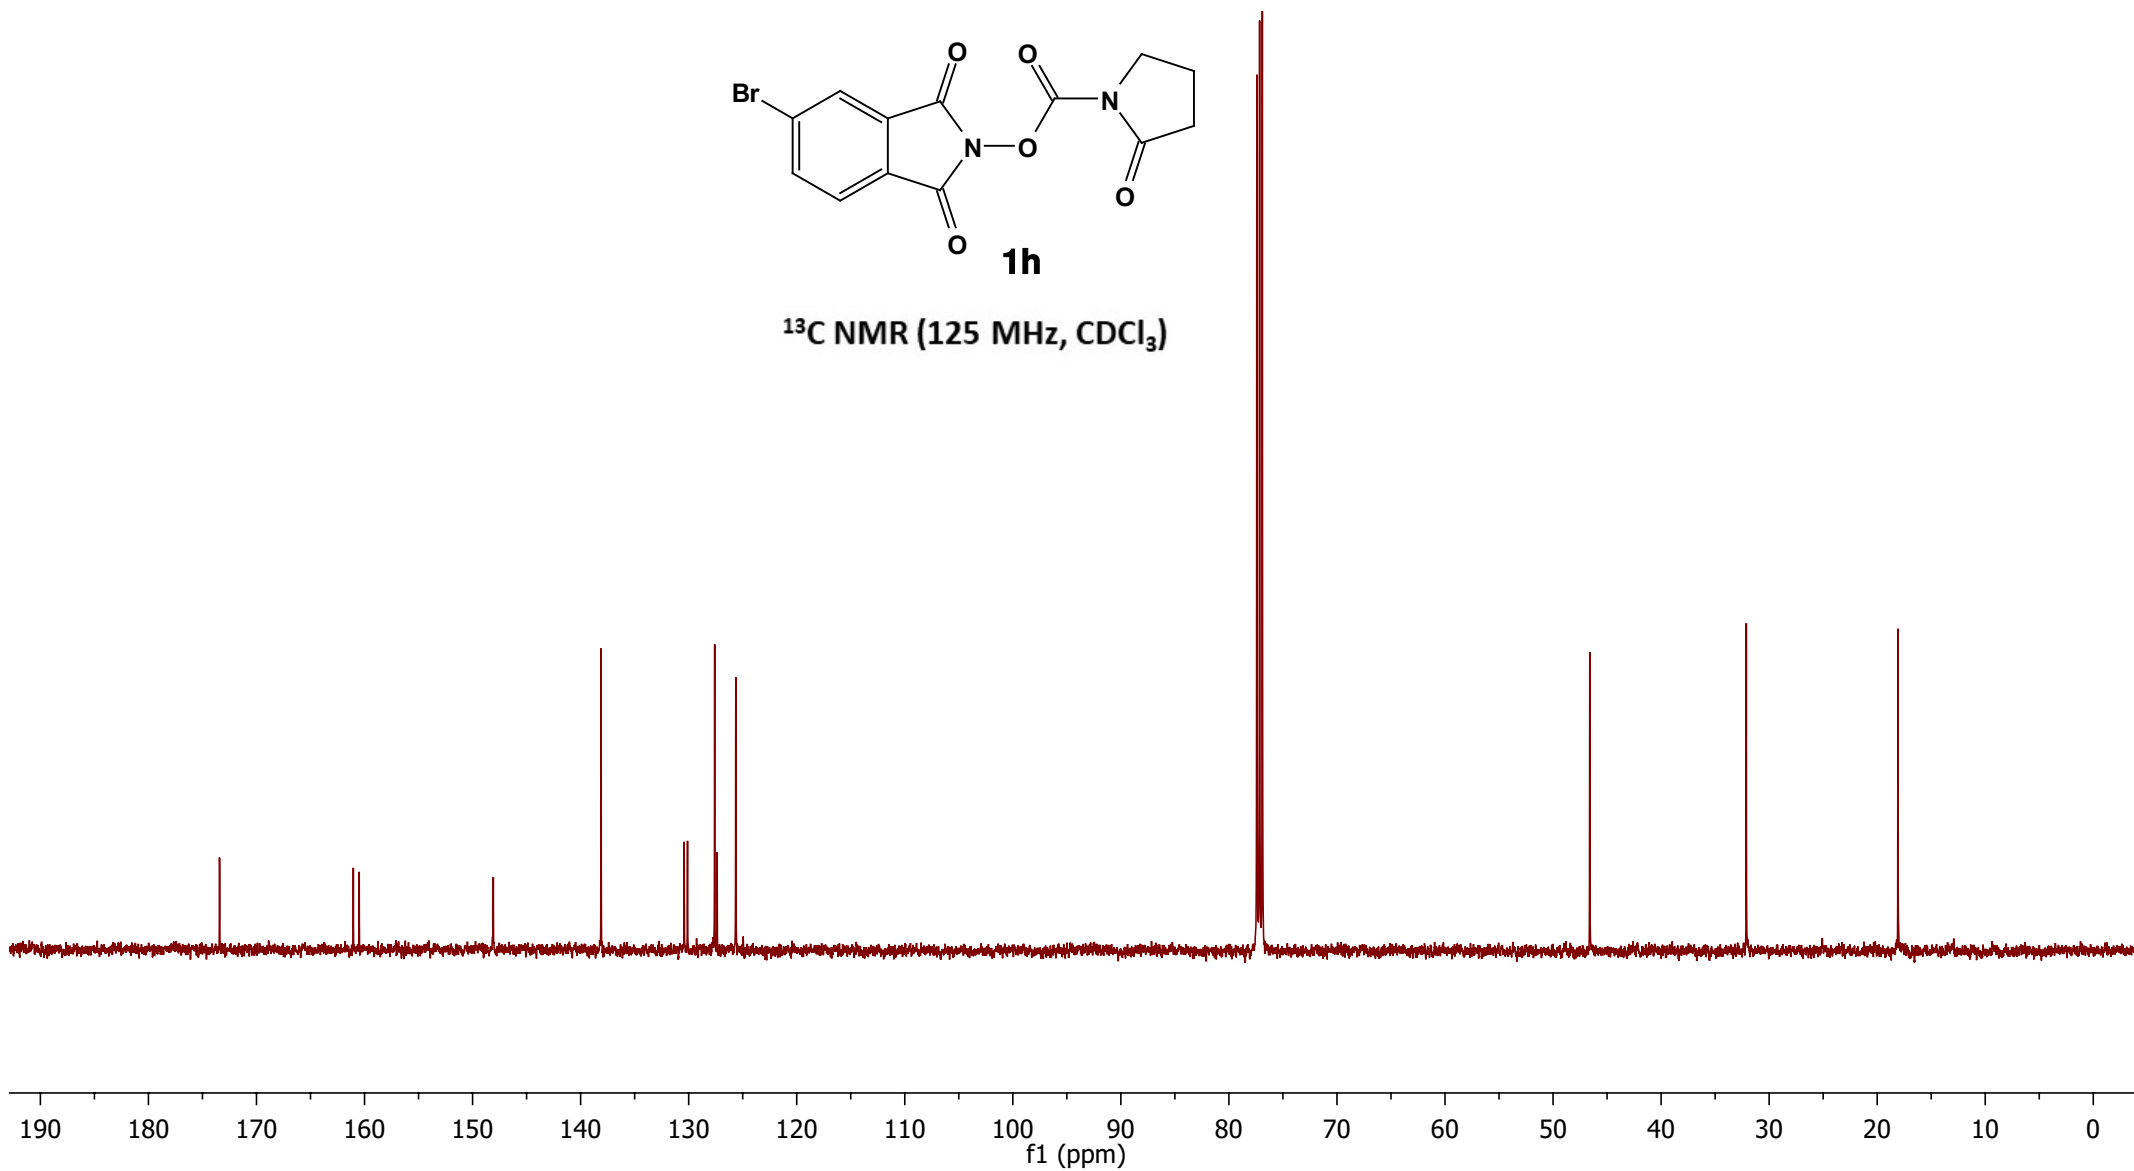

8.730  
8.695  
8.679  
8.674

8.138  
8.122

7.260

4.036  
4.022  
4.007

2.660  
2.644  
2.628  
2.246  
2.230  
2.215  
2.200  
2.185

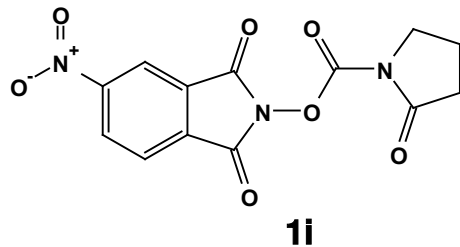

<sup>1</sup>H NMR (500 MHz, CDCl<sub>3</sub>)

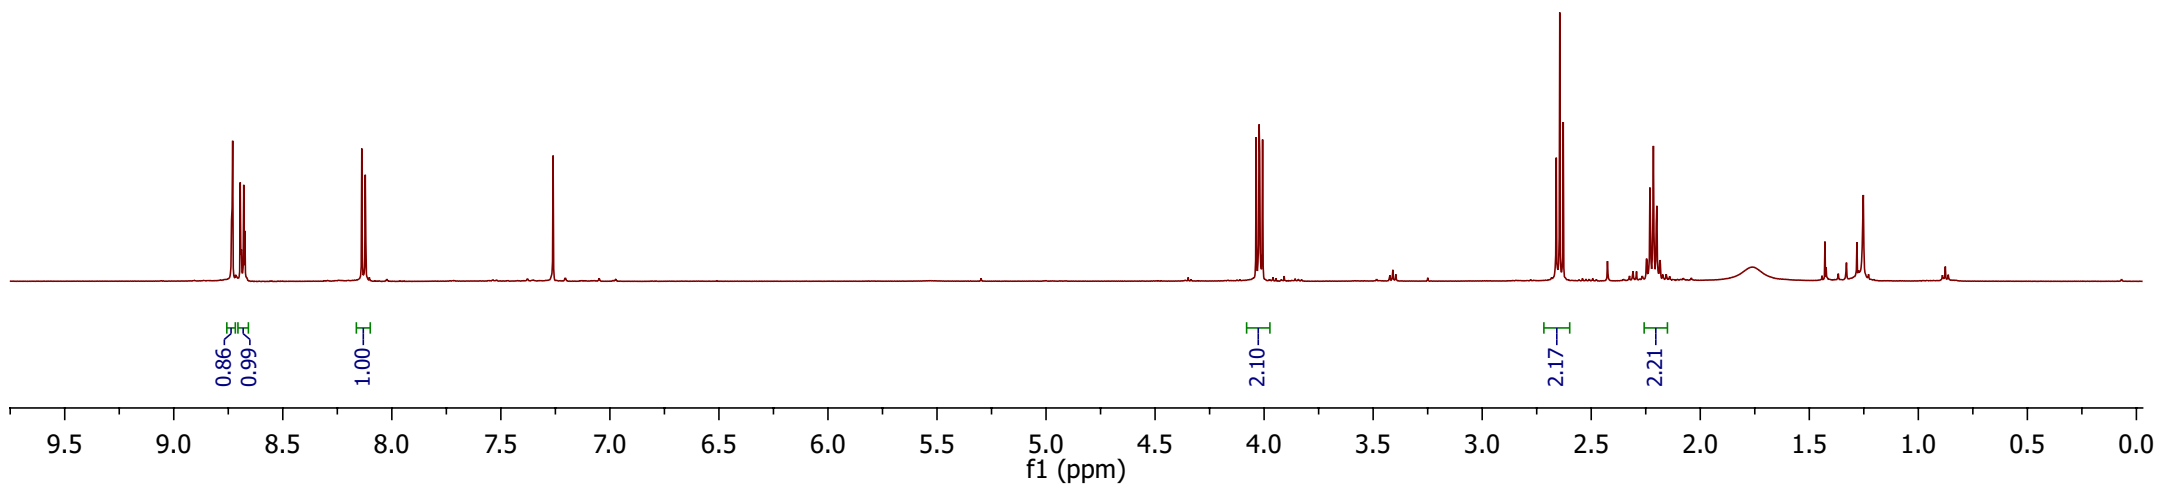

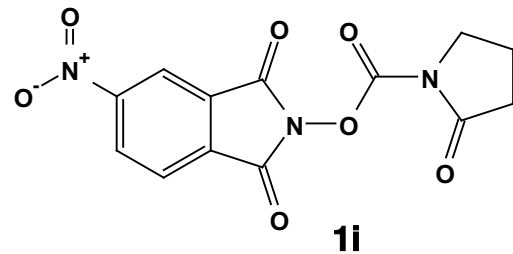

<sup>13</sup>C NMR (125 MHz, CDCl<sub>3</sub>)

—173.340

—159.662  
—159.438

—152.276

—147.866

—133.383

—130.383

—130.160

—125.679

—119.696

—77.415

—77.160

—76.905

—46.636

—32.093

—18.110

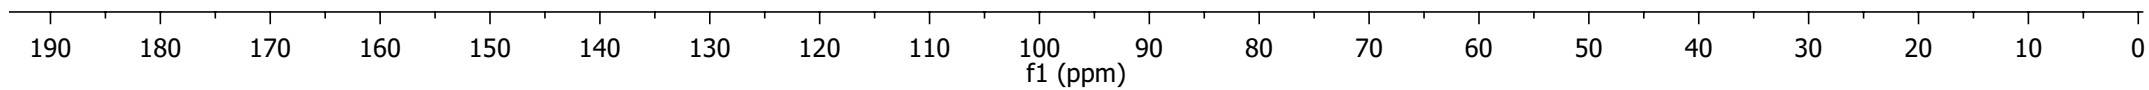

$^1\text{H}$  NMR (500 MHz,  $\text{CDCl}_3$ ):  $\delta$

7.260 Chloro

6.559

3.801

3.682

2.308

2.231

2.145

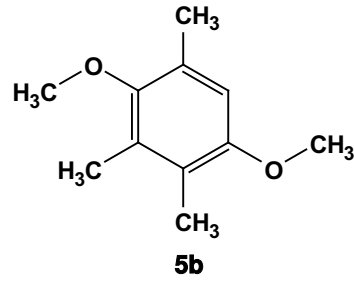

$^1\text{H}$  NMR (500 MHz,  $\text{CDCl}_3$ )

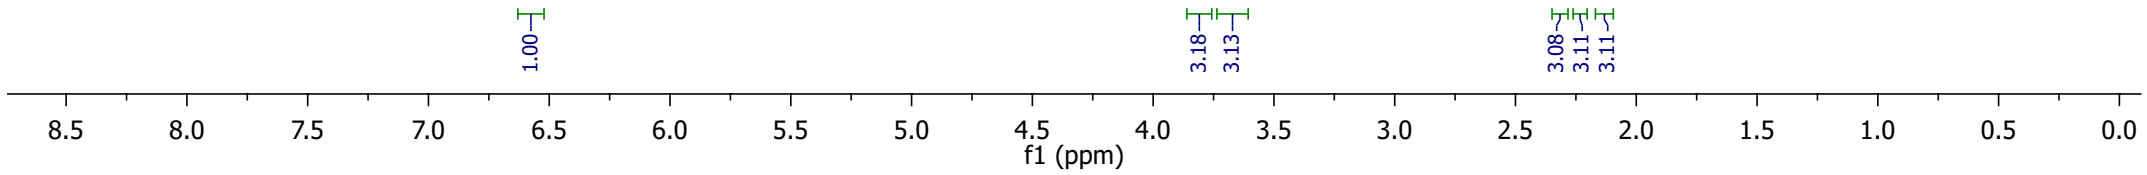



153.652  
150.713

130.732  
127.830  
123.890

110.480

77.415  
77.160  
76.906

60.258  
55.926

16.409  
12.765  
11.985

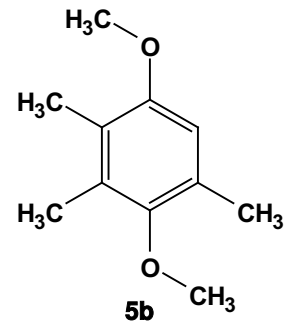

<sup>13</sup>C NMR (125 MHz, CDCl<sub>3</sub>)

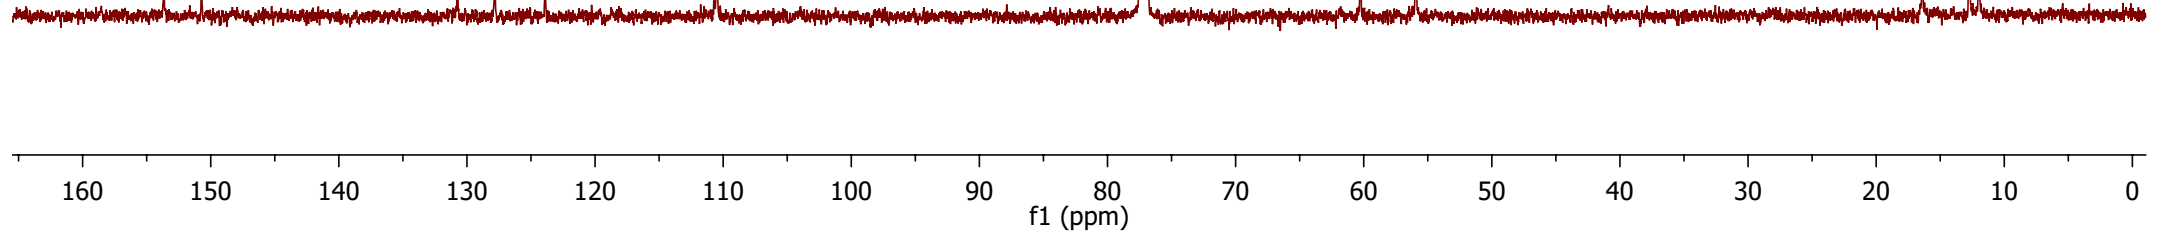

—7.260 Chloroform-d

—6.522

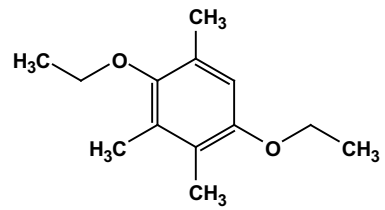

**5c**

<sup>1</sup>H NMR (500 MHz, CDCl<sub>3</sub>)

3.984  
3.971  
3.957  
3.942  
3.773  
3.758  
3.744  
3.731

2.250  
2.188  
2.120

1.413  
1.408  
1.400  
1.393  
1.384  
1.379

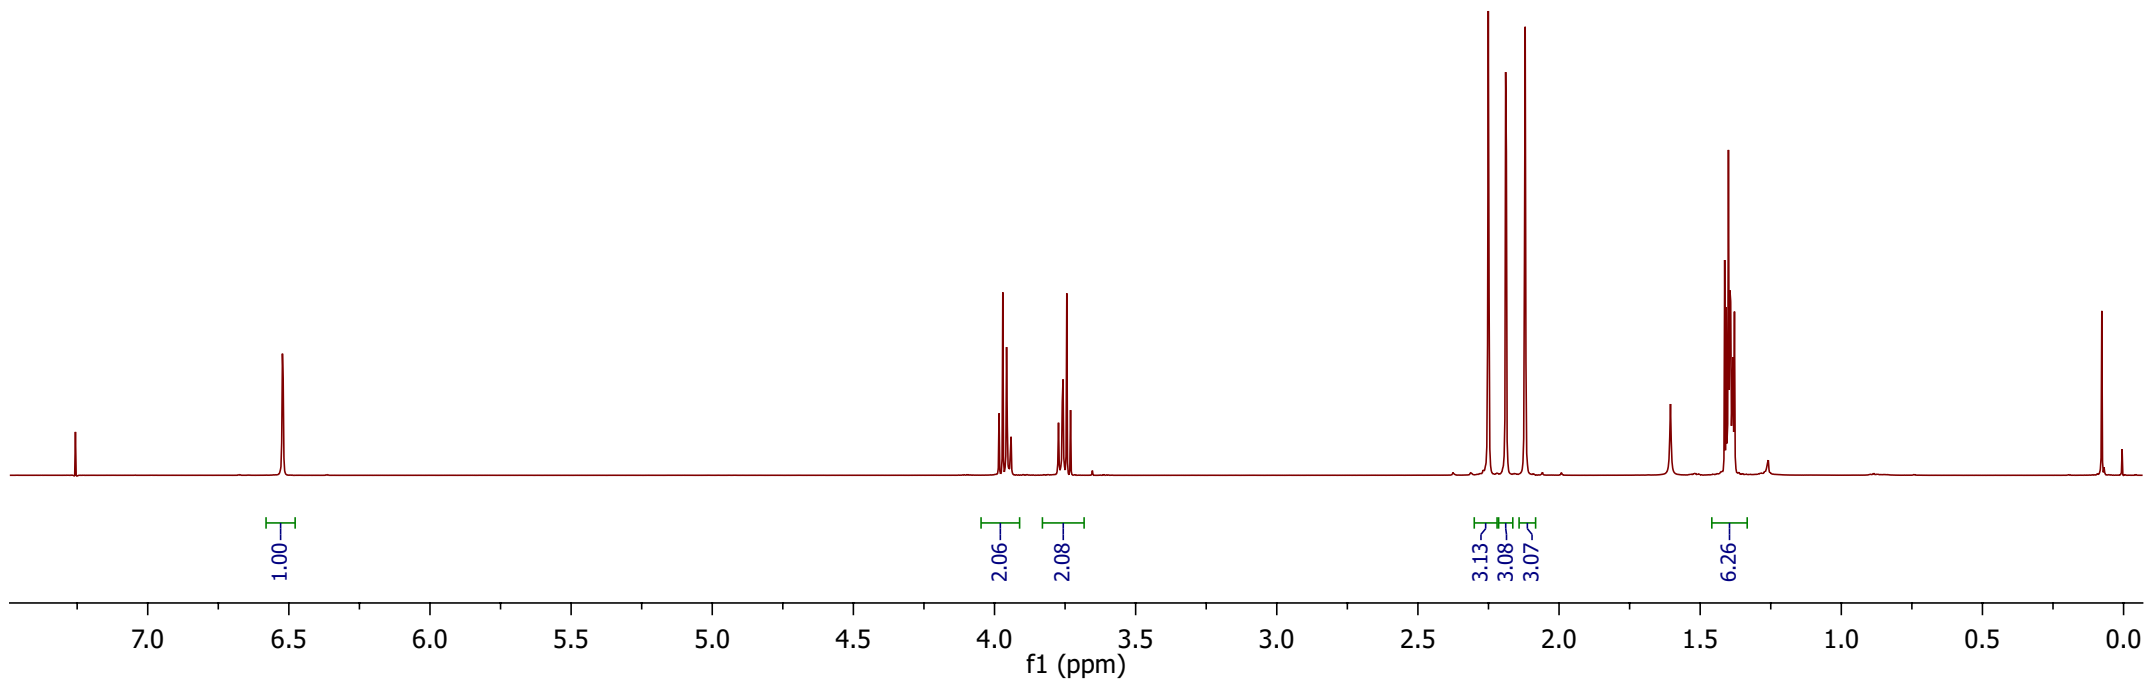

—152.937  
—149.759

—130.789  
—127.902  
—124.097

—111.810

—77.414  
—77.160  
—76.906

—68.346  
—64.297

—16.569  
—15.780  
—15.233  
—13.030  
—12.083

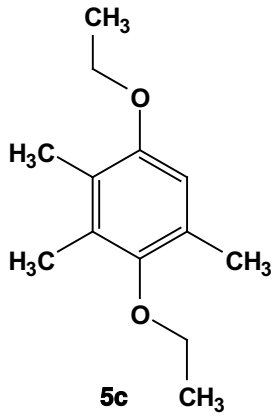

<sup>13</sup>C NMR (125 MHz, CDCl<sub>3</sub>)

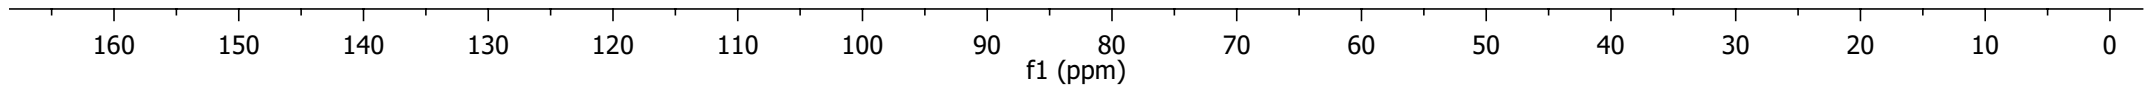

7.435  
7.428  
7.415  
7.400  
7.385  
7.351  
7.336  
7.317  
7.303  
7.260

6.252

3.879  
3.732

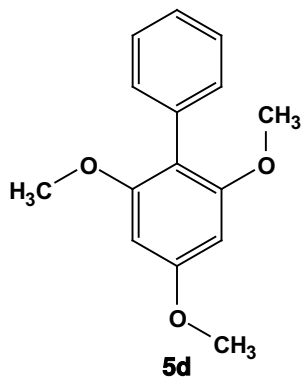

<sup>1</sup>H NMR (500 MHz, CDCl<sub>3</sub>)

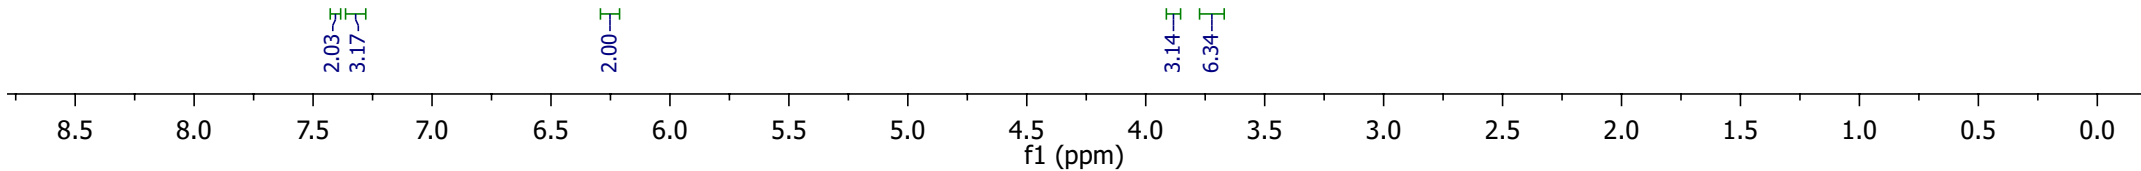

—160.653  
—158.498

—134.269  
—131.340  
—127.751  
—126.608

—112.740

—91.118

—77.414  
—77.160  
—76.906

—56.019  
—55.502

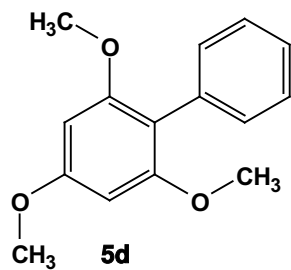

<sup>13</sup>C NMR (125 MHz, CDCl<sub>3</sub>)

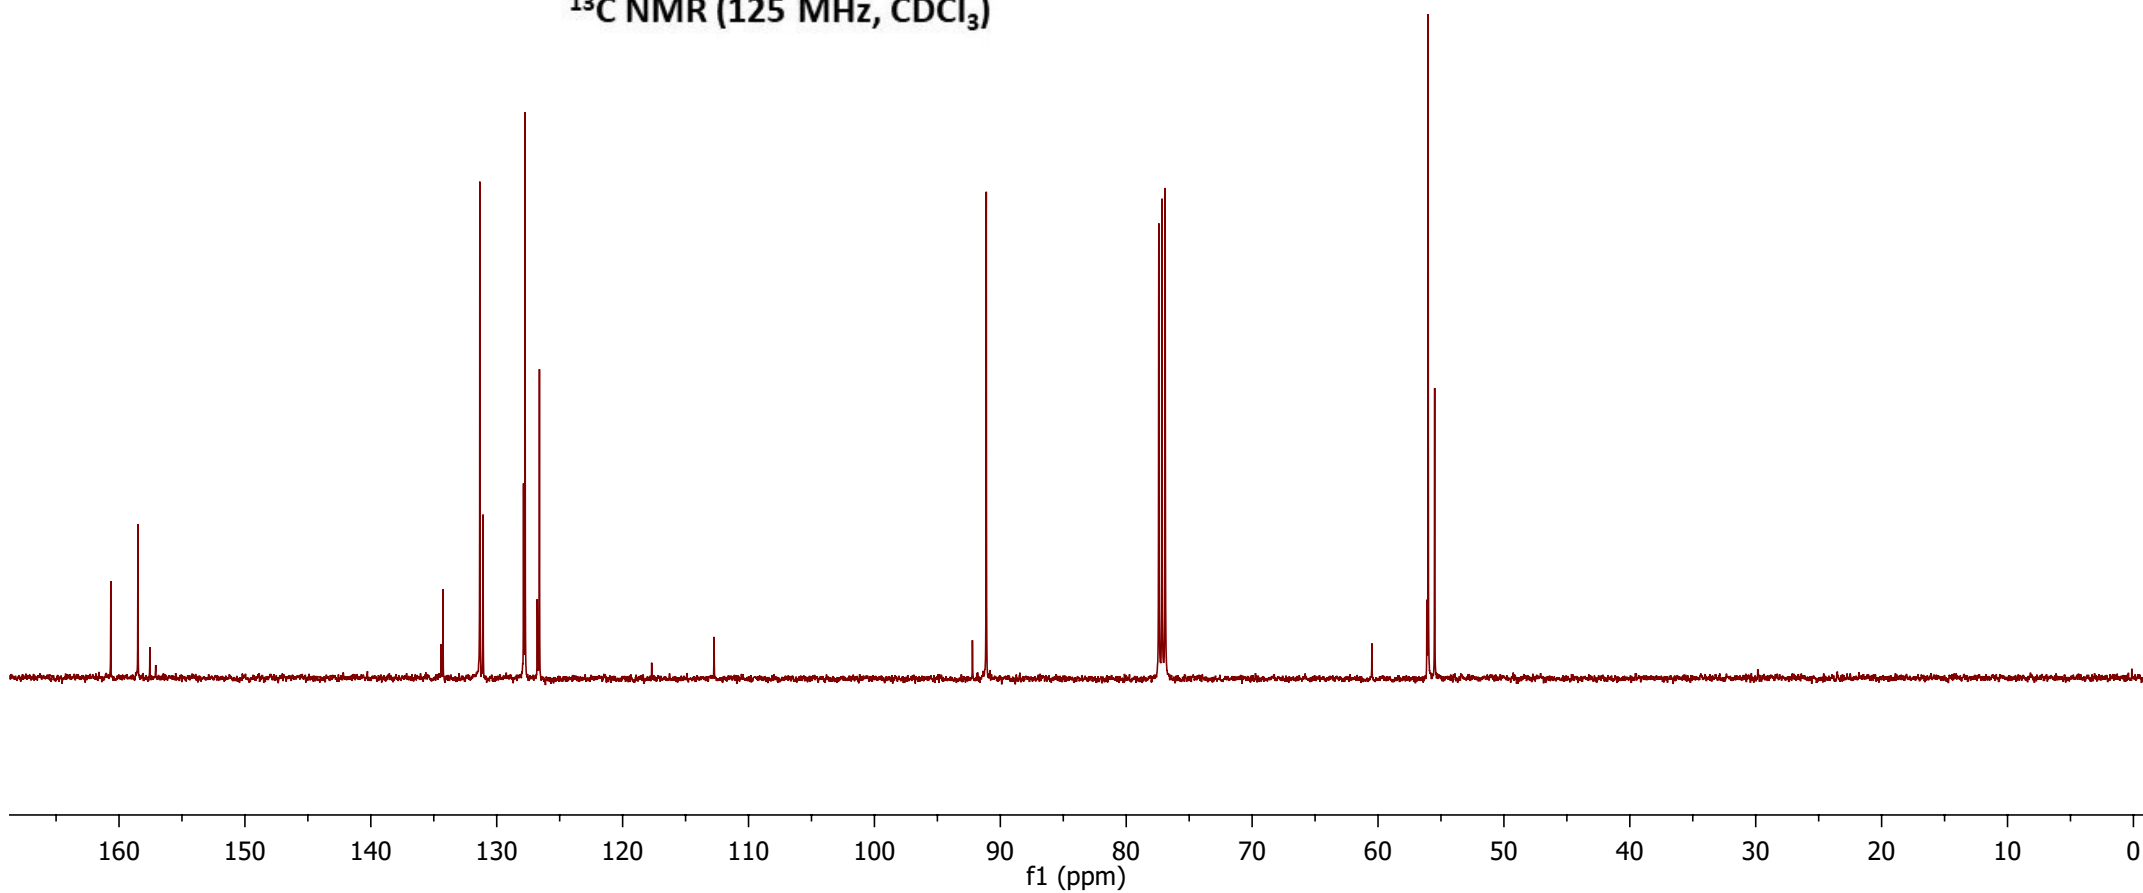

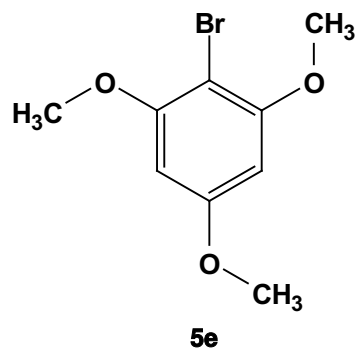

**<sup>1</sup>H NMR (500 MHz, CDCl<sub>3</sub>)**

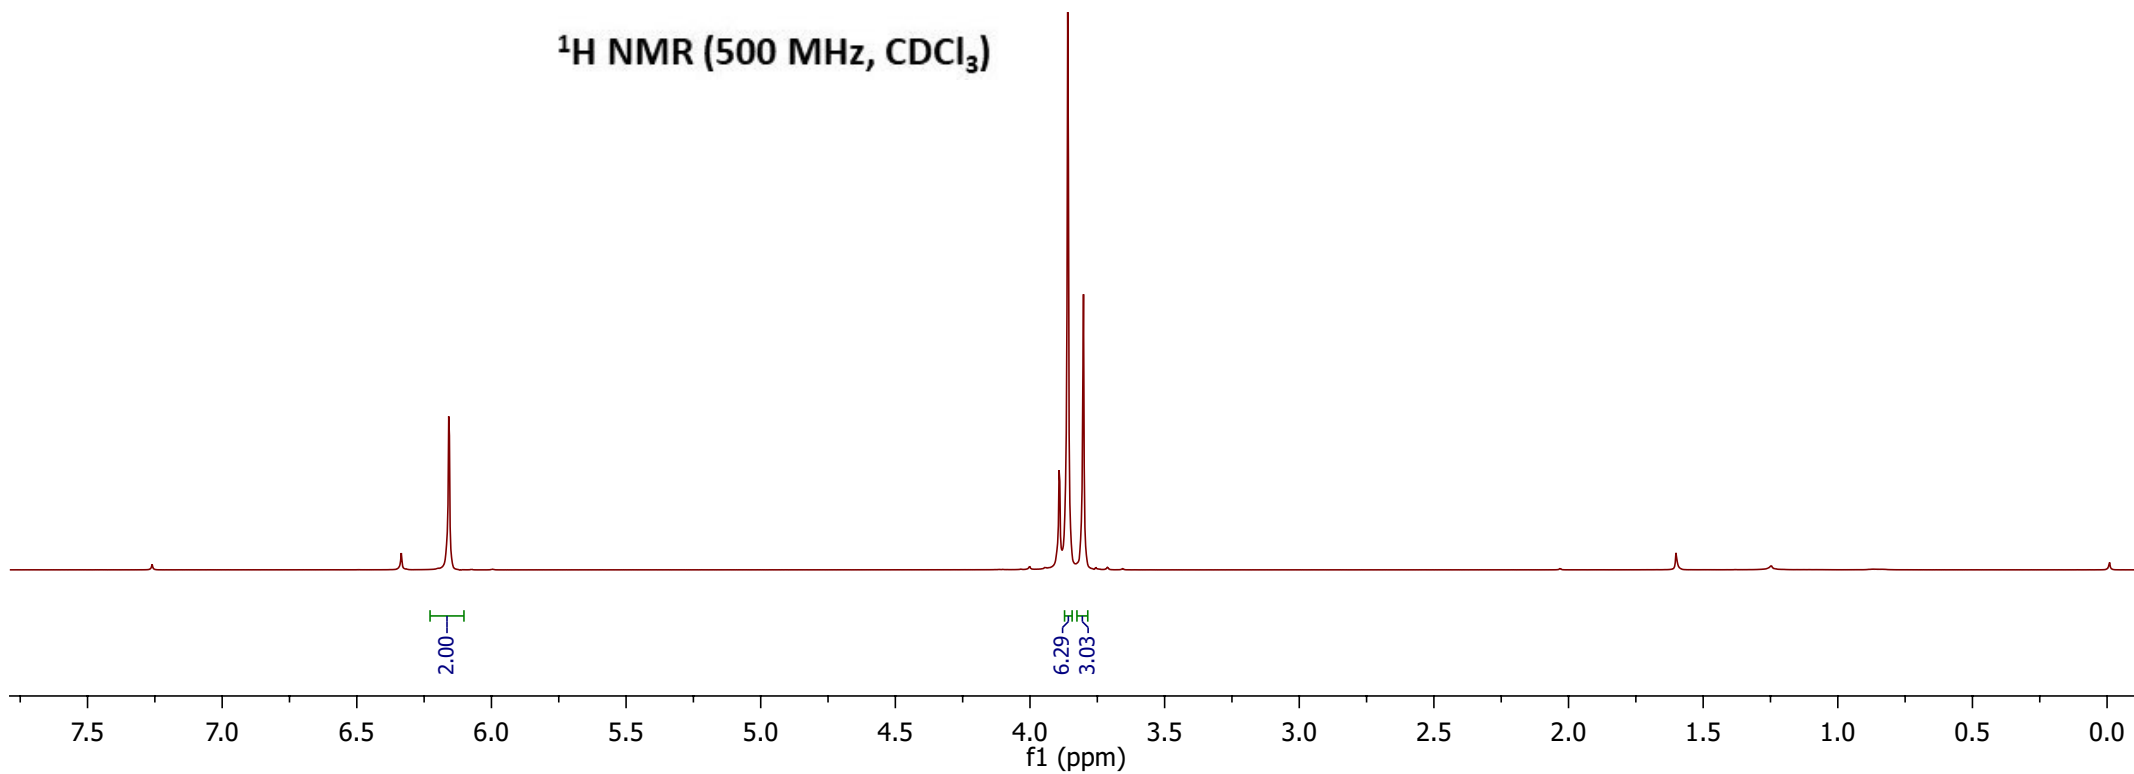

—160.585  
—157.577

—98.988

—91.778

77.413  
77.160  
76.906

56.446  
55.617

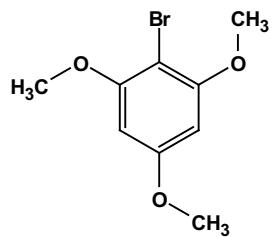

**5e**

**<sup>13</sup>C NMR (125 MHz, CDCl<sub>3</sub>)**

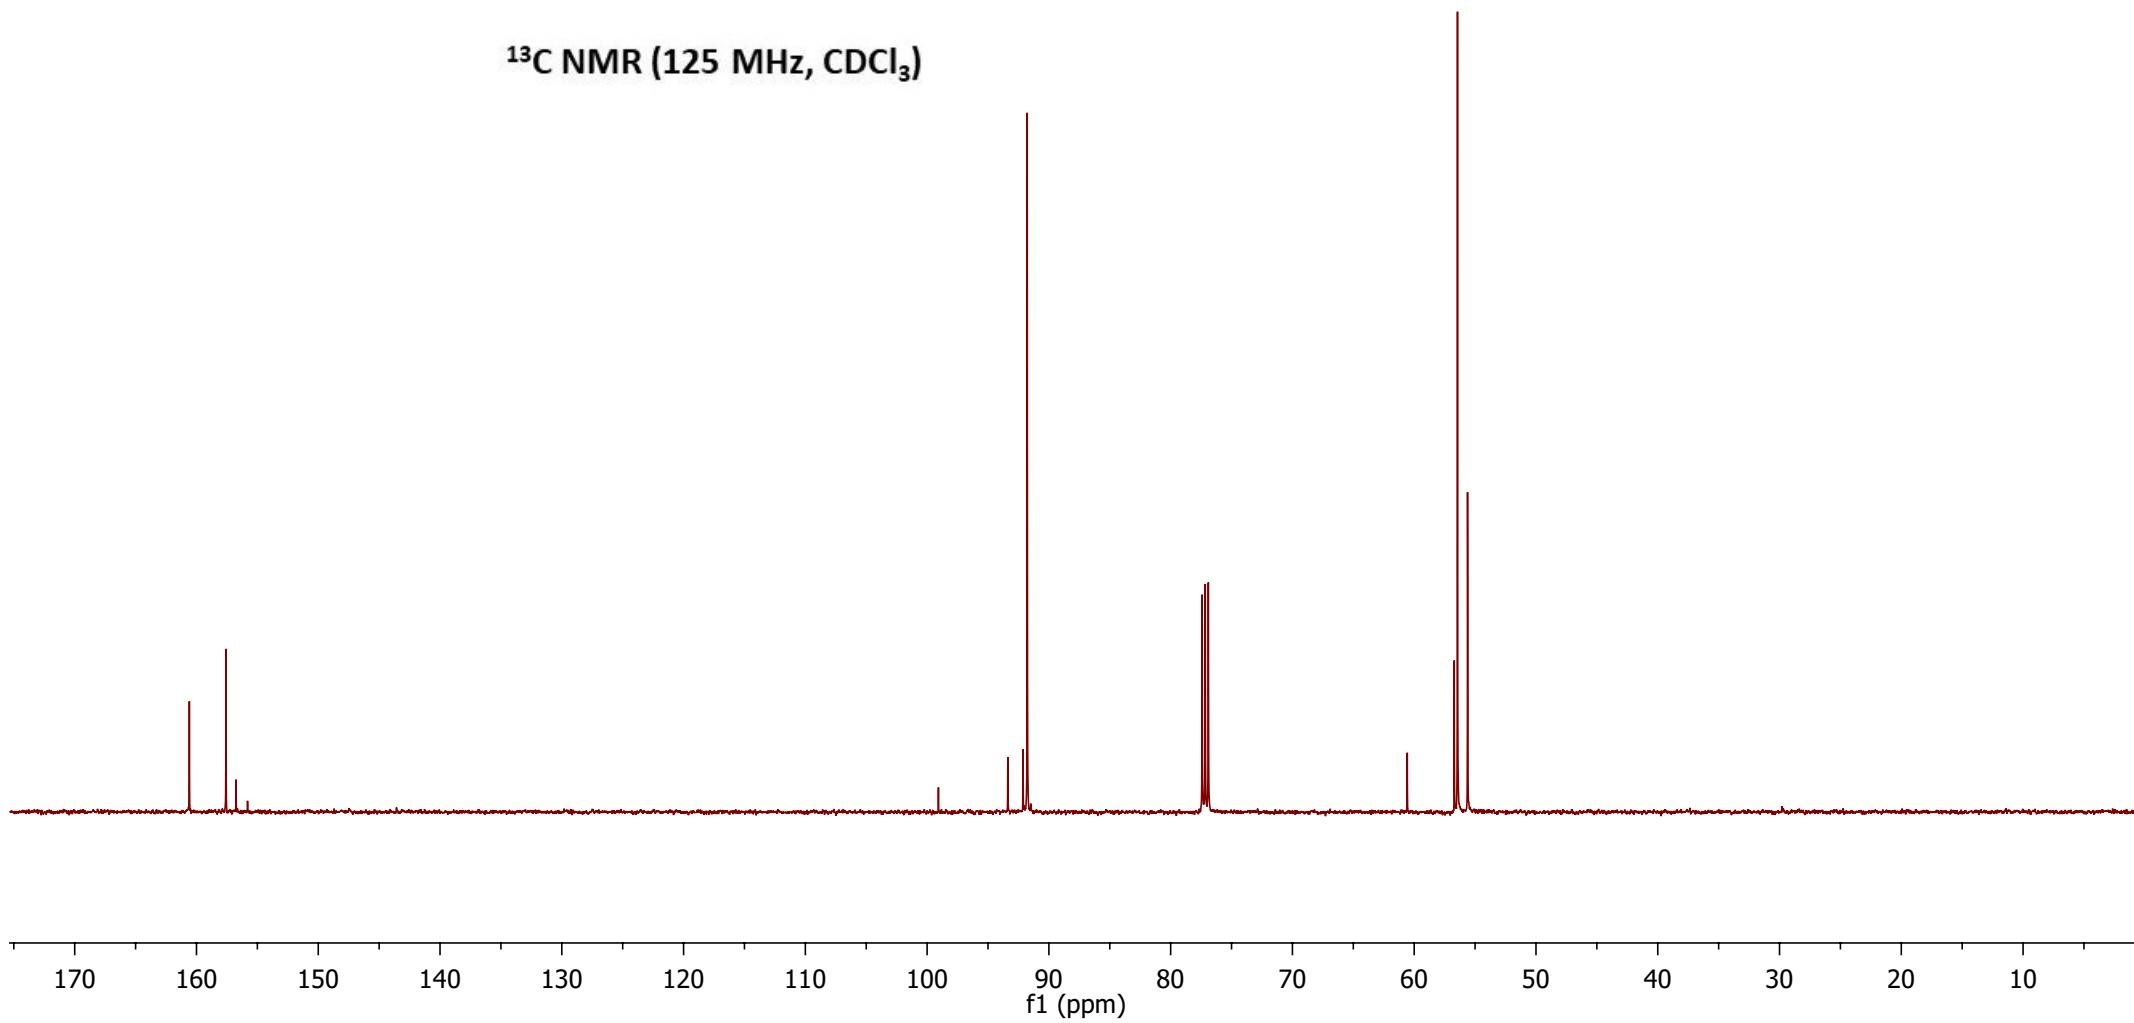

7.239  
7.222

6.499  
6.495  
6.431  
6.427  
6.414  
6.410

3.860  
3.782

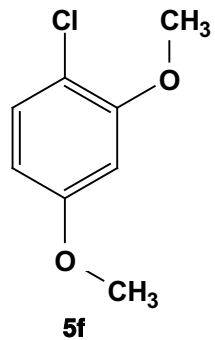

<sup>1</sup>H NMR (500 MHz, CDCl<sub>3</sub>)

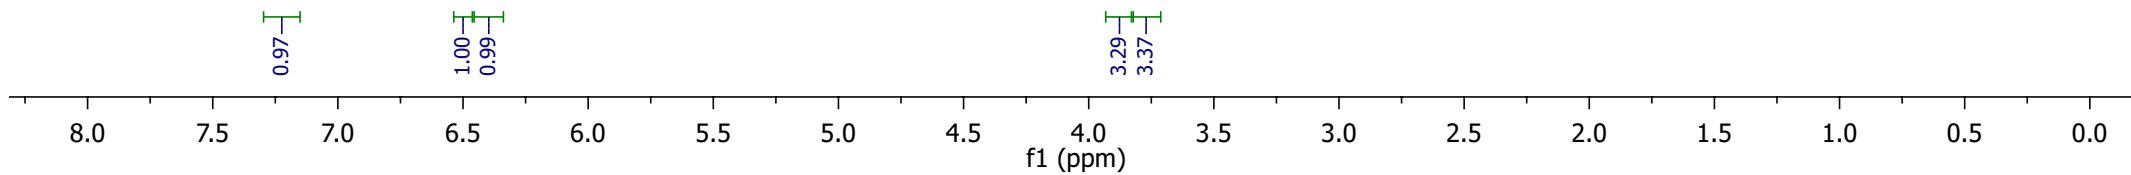



—159.605  
—155.725

—130.209

—114.221

—105.292

—100.113

77.416  
77.160  
76.906

56.118  
55.634

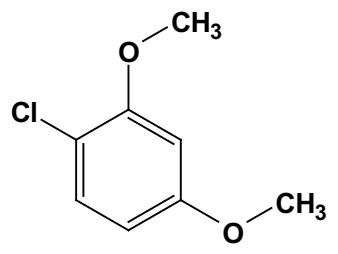

<sup>13</sup>C NMR (125 MHz, CDCl<sub>3</sub>)

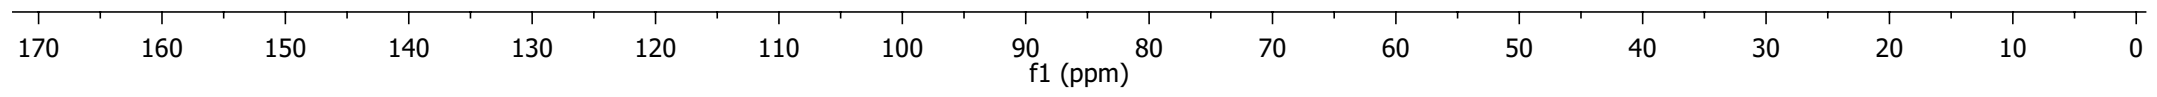

7.662  
7.646  
7.614  
7.598  
7.260  
7.243  
7.226

6.600  
6.596  
6.579  
6.568  
6.565

3.862  
3.811

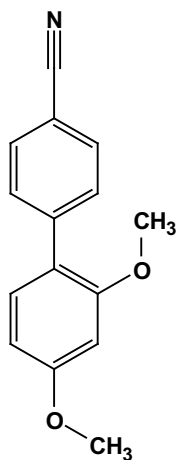

5h

<sup>1</sup>H NMR (500 MHz, CDCl<sub>3</sub>)

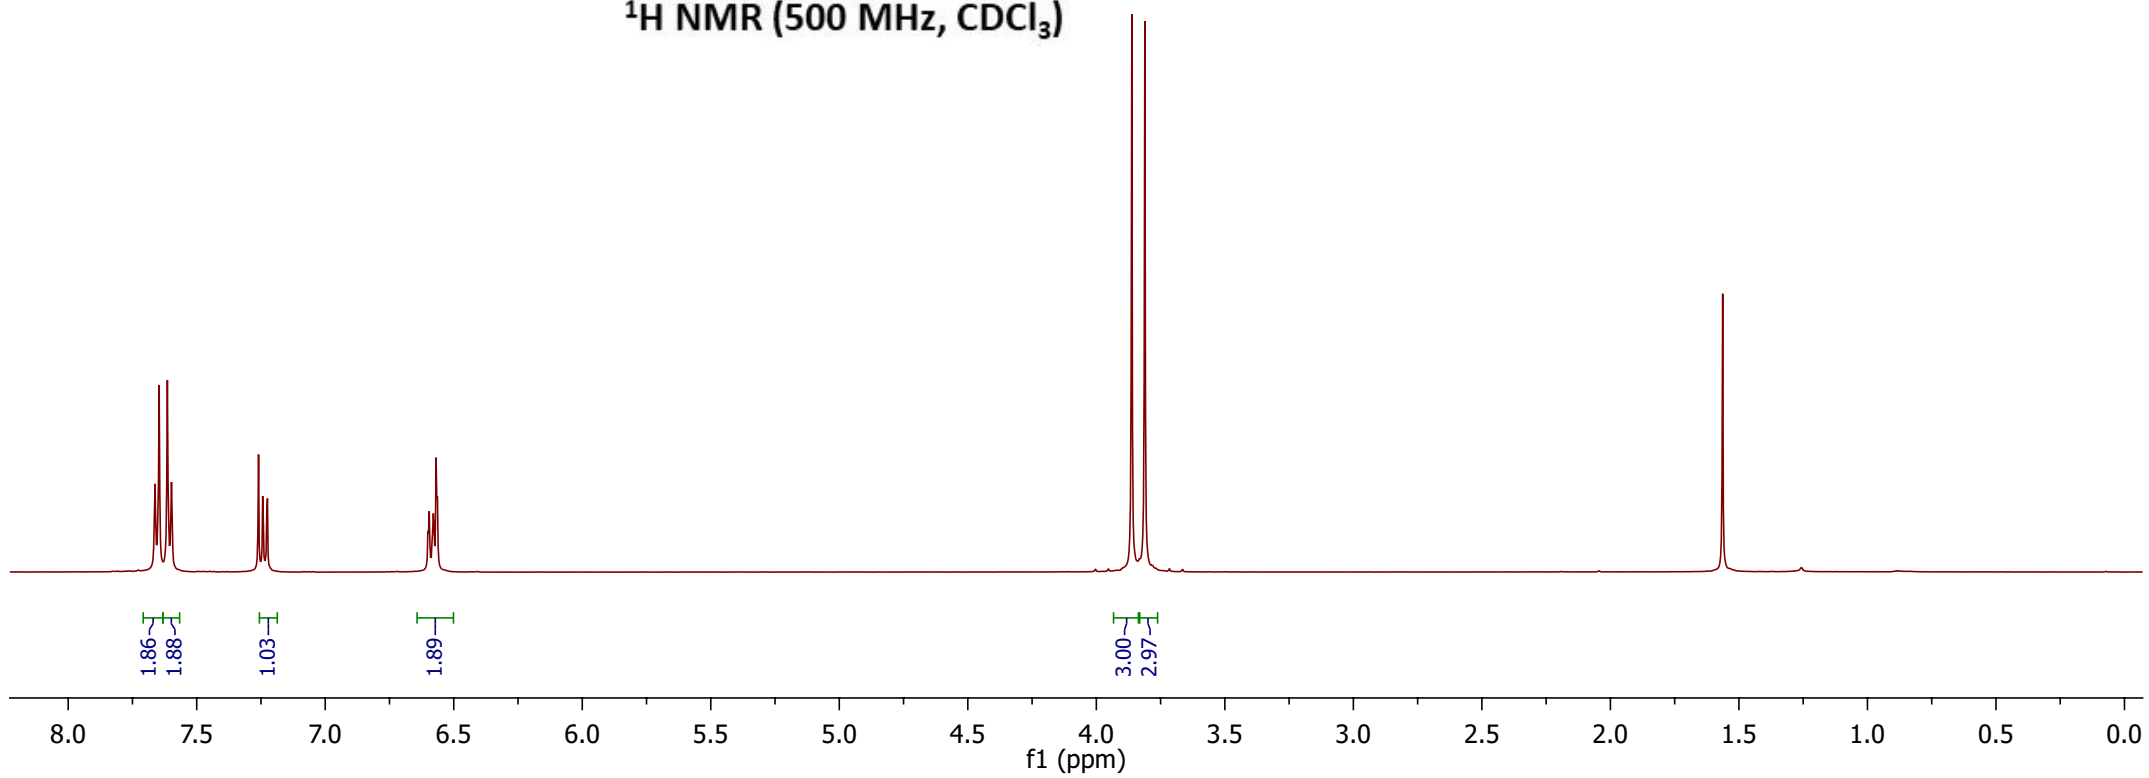

—161.471

—157.653

—143.423

—131.894

—131.391

—130.145

—121.651

—119.431

—109.986

—105.184

—99.234

—77.415

—77.160

—76.905

—55.706

—55.638

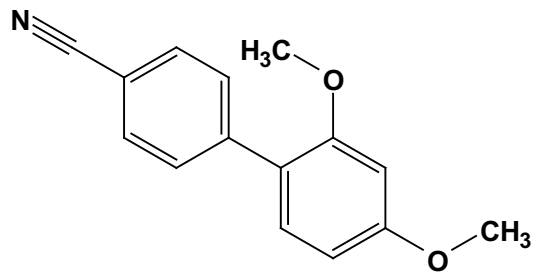

5h

<sup>13</sup>C NMR (125 MHz, CDCl<sub>3</sub>)

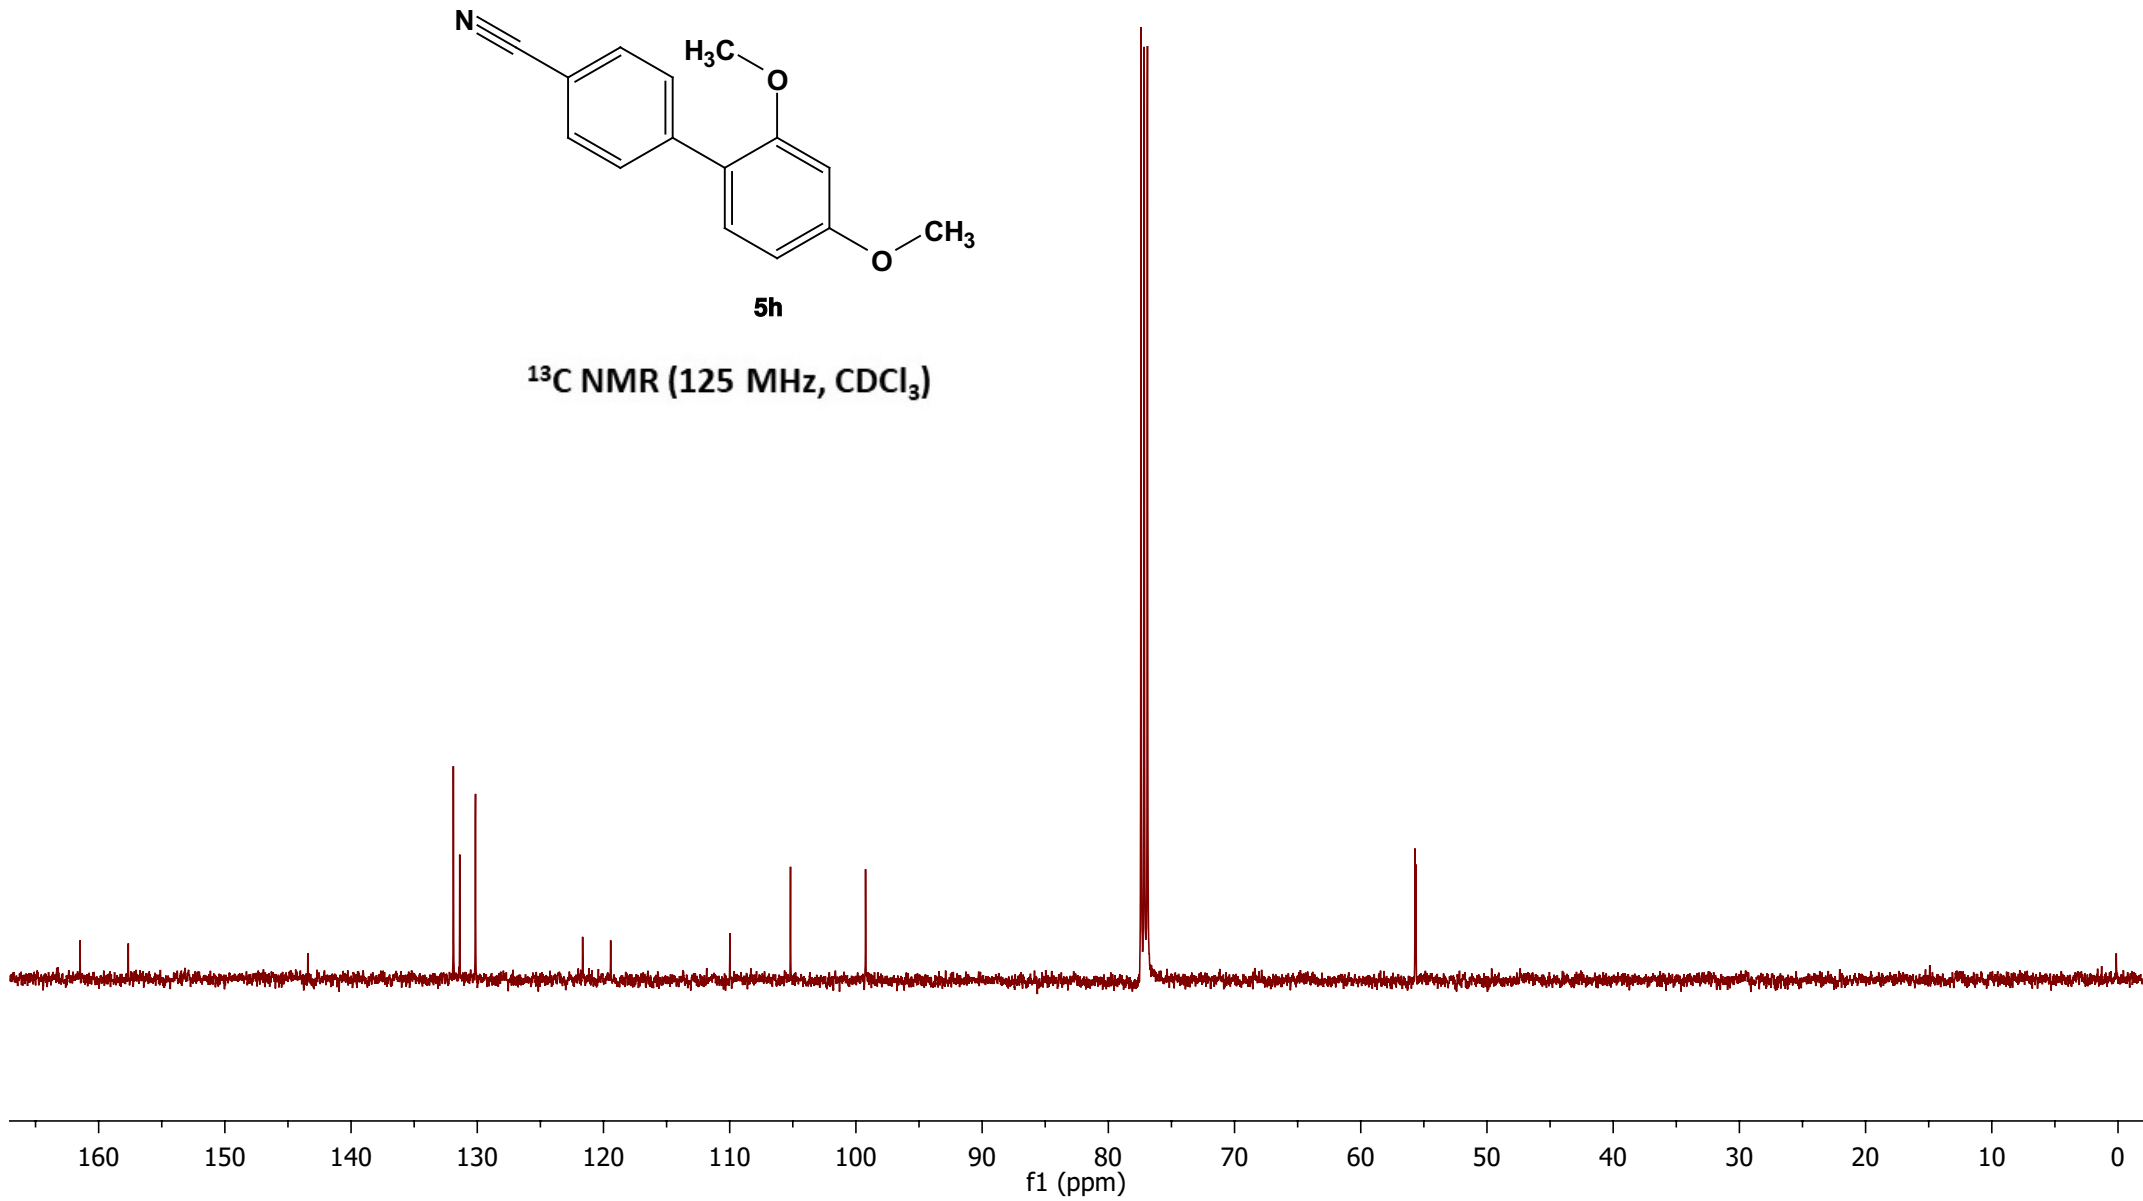

7.575  
7.560  
7.463  
7.448  
7.432  
7.363  
7.349  
7.334  
7.316  
7.301  
7.298  
7.260  
6.633  
6.628

3.897  
3.842

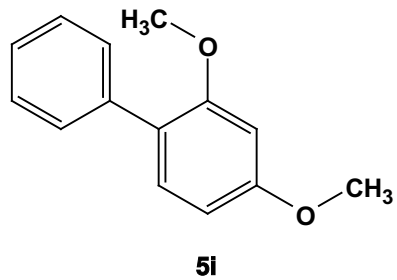

<sup>1</sup>H NMR (500 MHz, CDCl<sub>3</sub>)

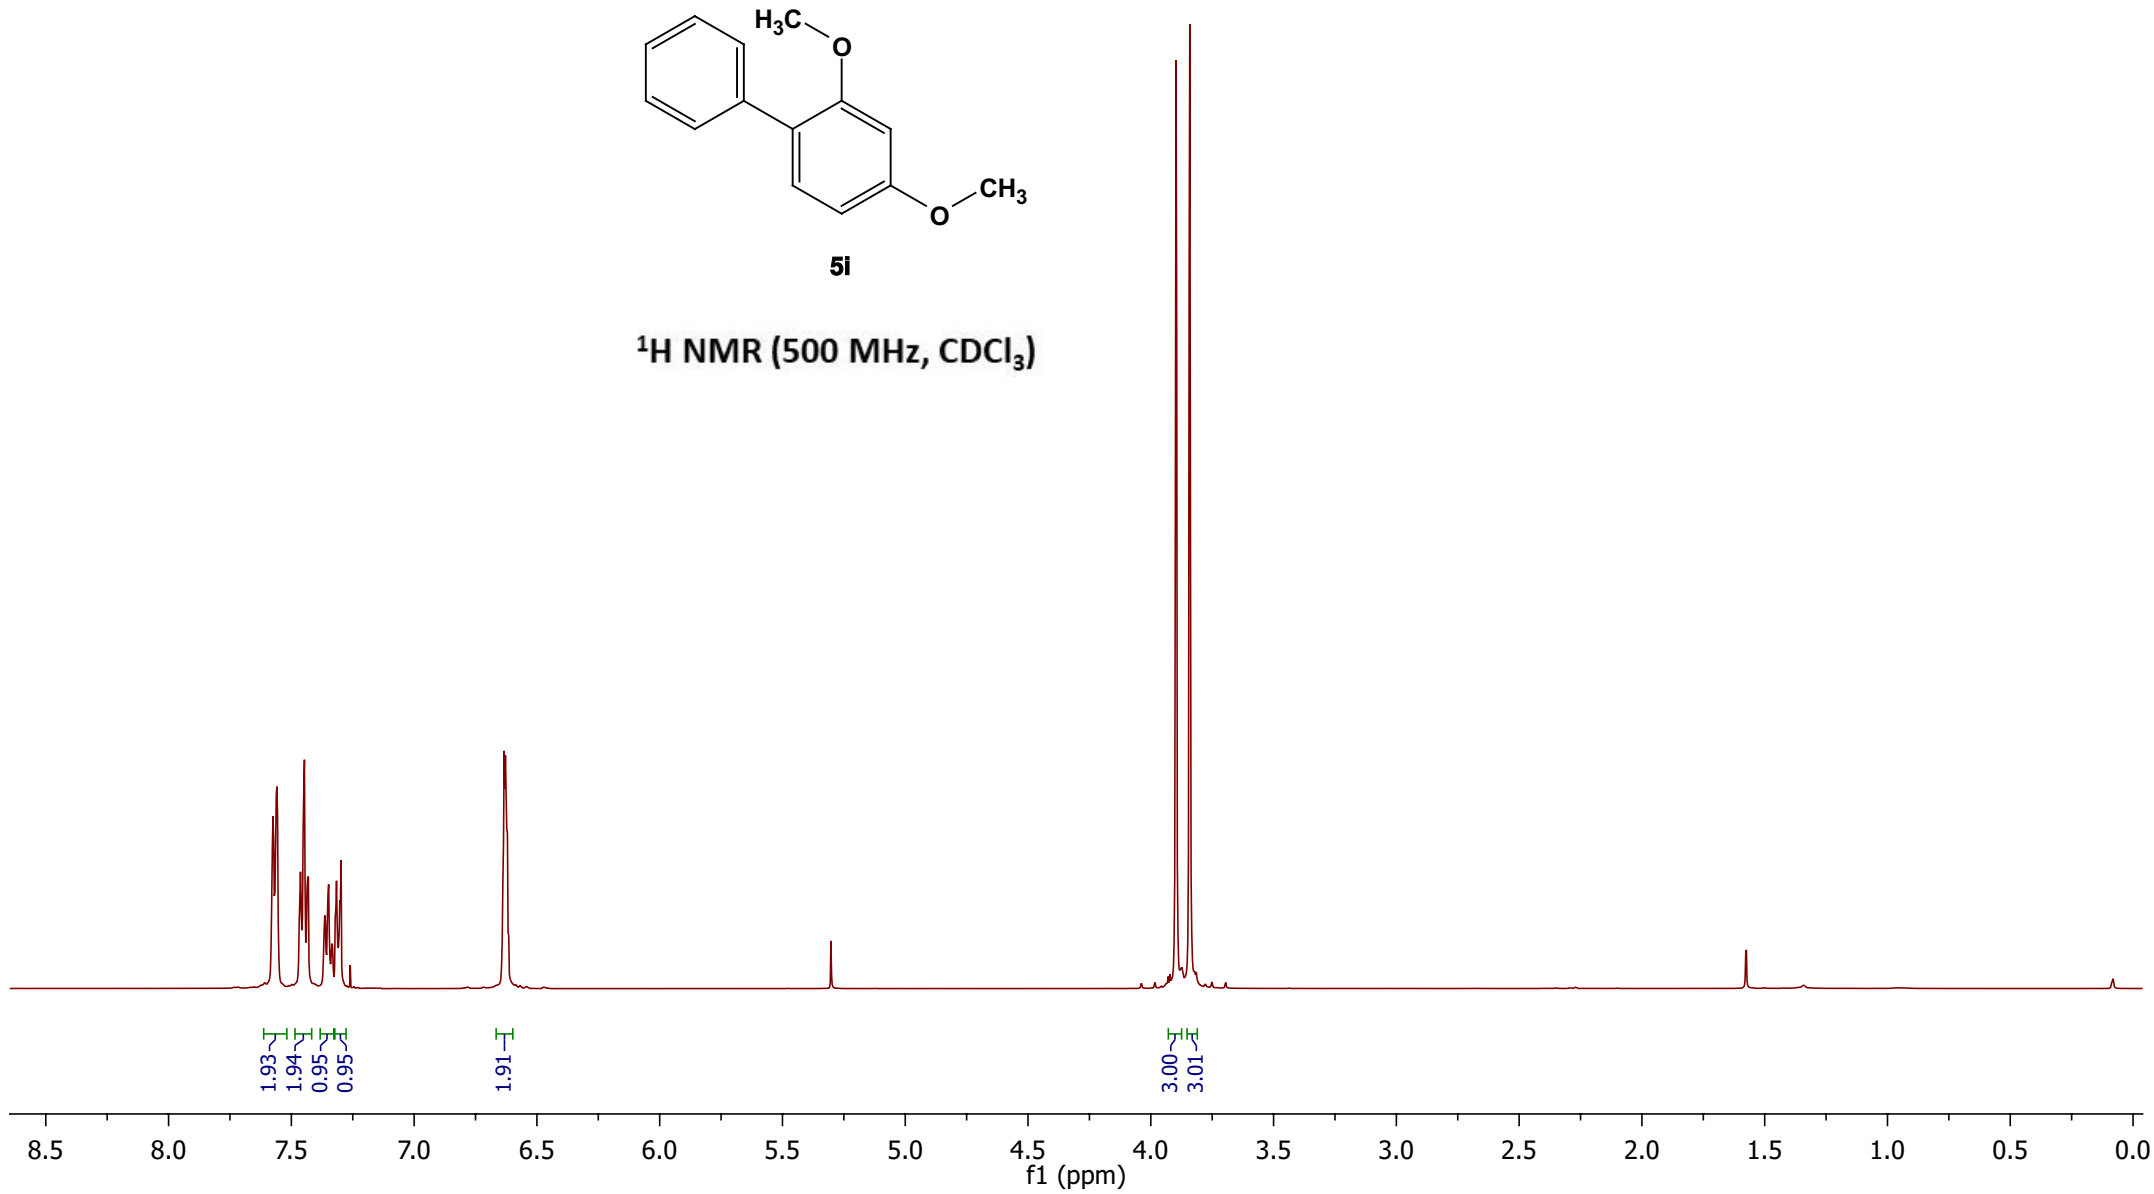

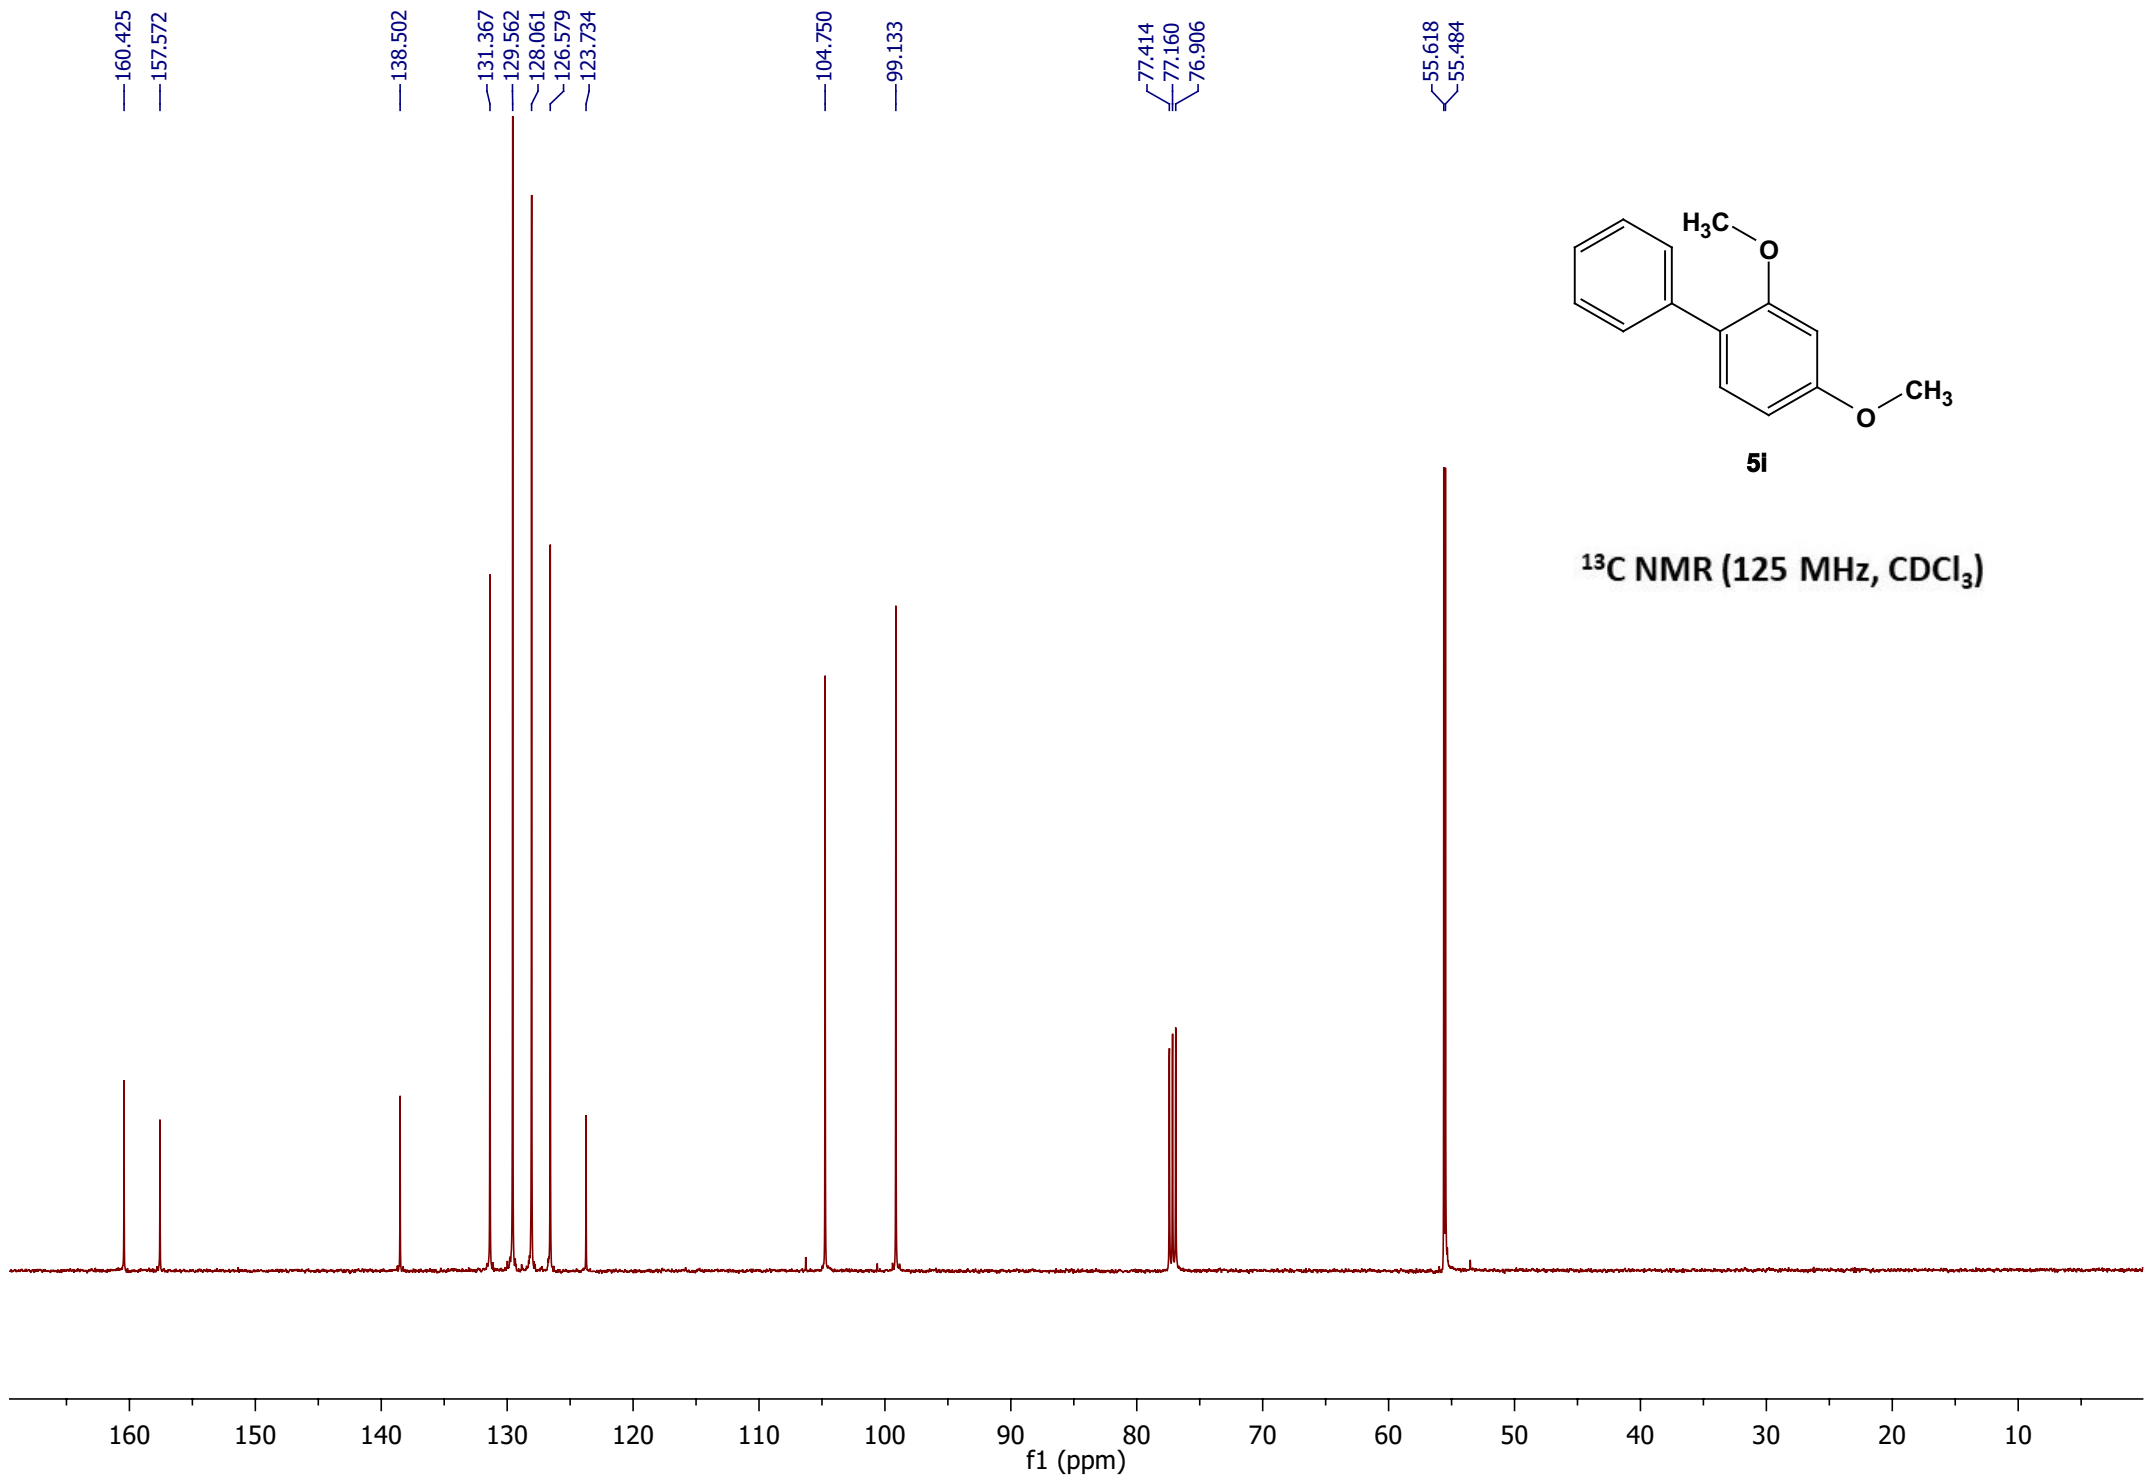

7.311  
7.295  
7.260

6.507  
6.503  
6.492  
6.487  
6.413

3.822  
3.733

1.428  
1.414  
1.399  
1.383  
1.369  
1.057  
1.041

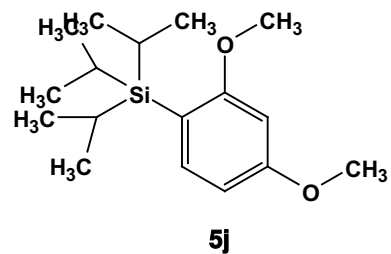

<sup>1</sup>H NMR (500 MHz, CDCl<sub>3</sub>)

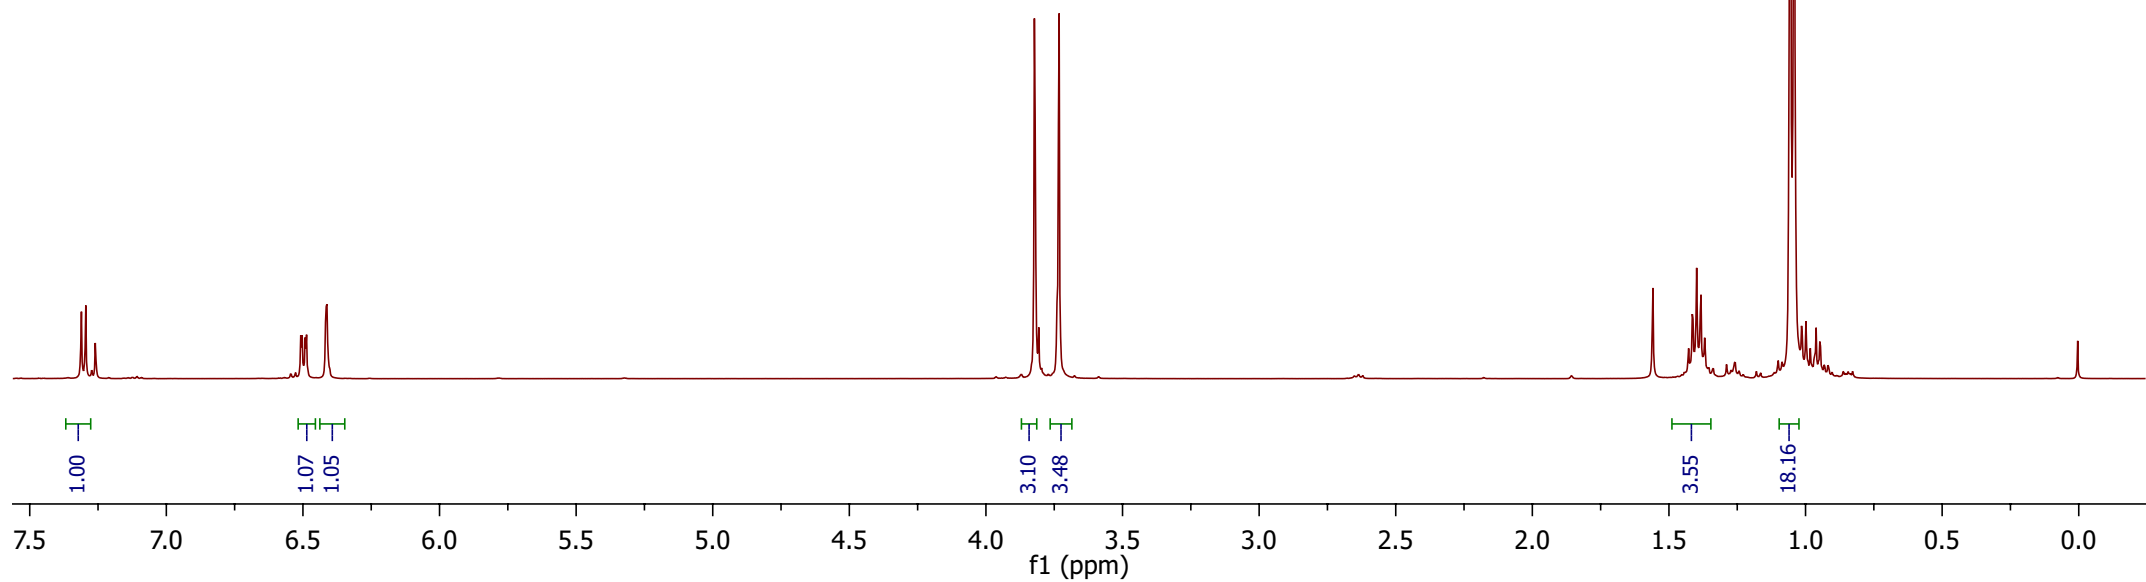

—166.127

—162.085

—137.723

—114.554

—104.306

—97.685

—77.415

—77.160

—76.905

—55.234

—54.551

—19.071

—11.791

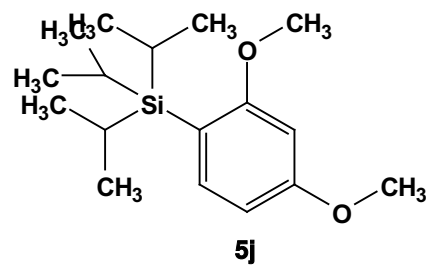

<sup>13</sup>C NMR (125 MHz, CDCl<sub>3</sub>)

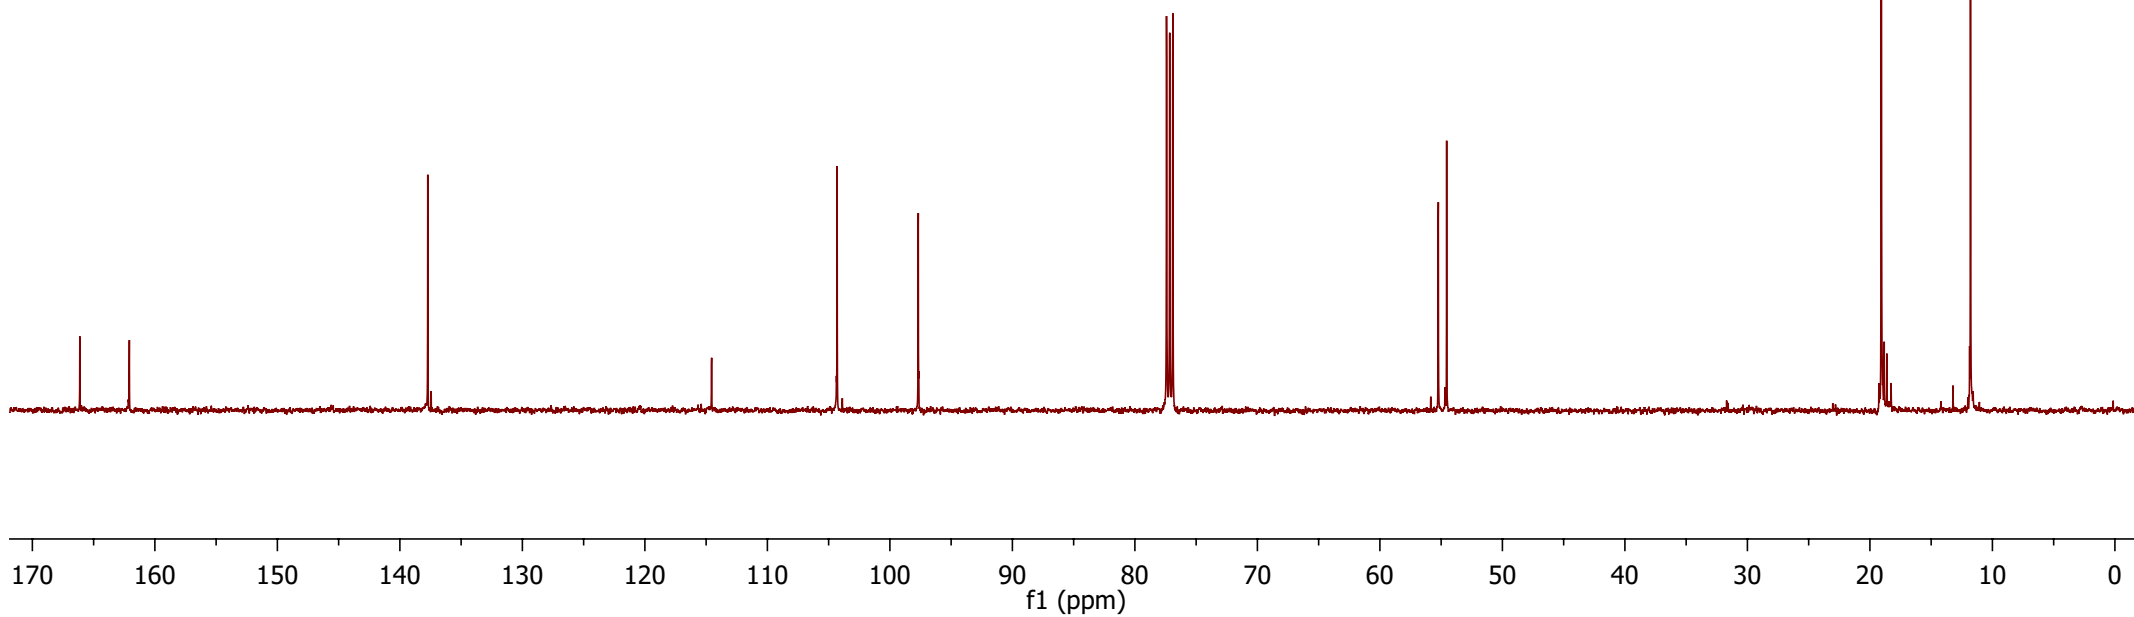

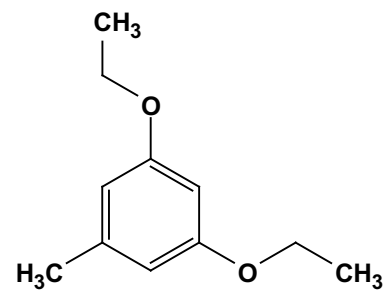

5I

<sup>1</sup>H NMR (500 MHz, CDCl<sub>3</sub>)

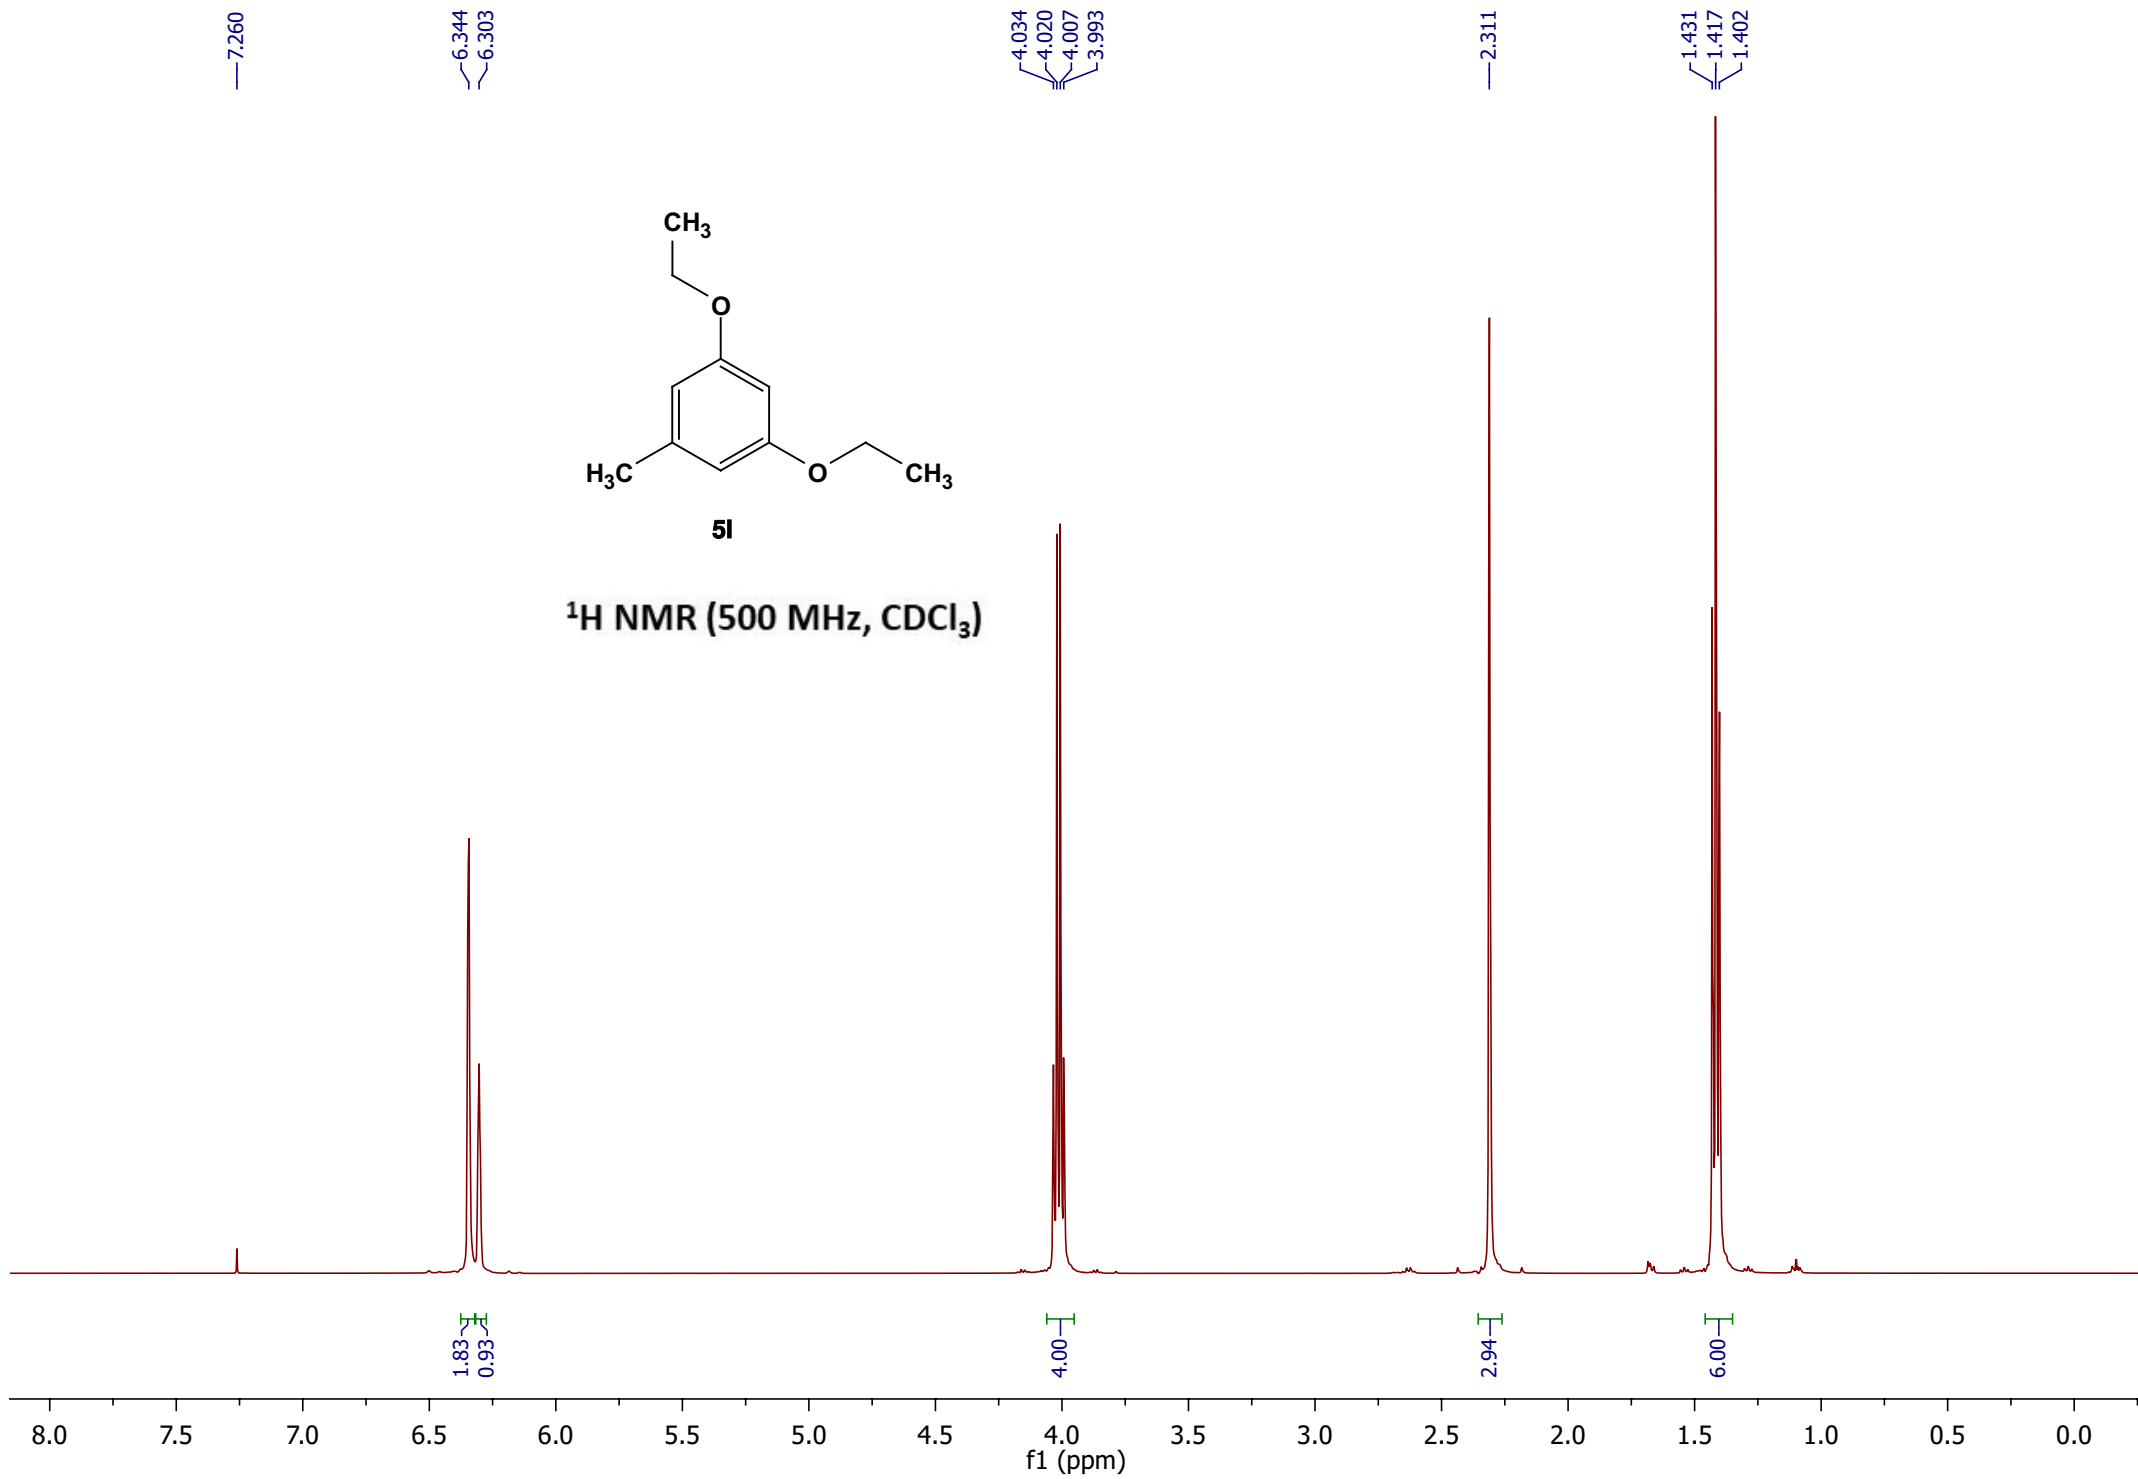



—160.121

—140.116

—107.704

—98.541

77.414  
77.160  
76.907

—63.381

—21.859

—14.939

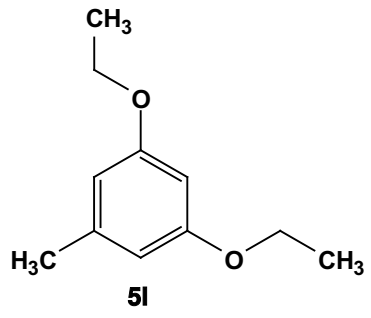

<sup>13</sup>C NMR (125 MHz, CDCl<sub>3</sub>)

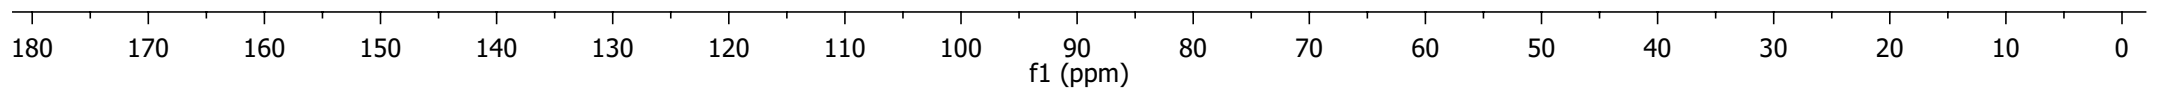

7.260  
7.232  
7.215

6.478  
6.474  
6.460

4.424

3.815  
3.804

3.377

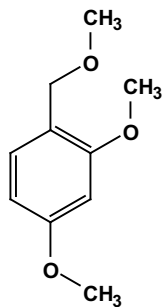

5m

<sup>1</sup>H NMR (500 MHz, CDCl<sub>3</sub>)

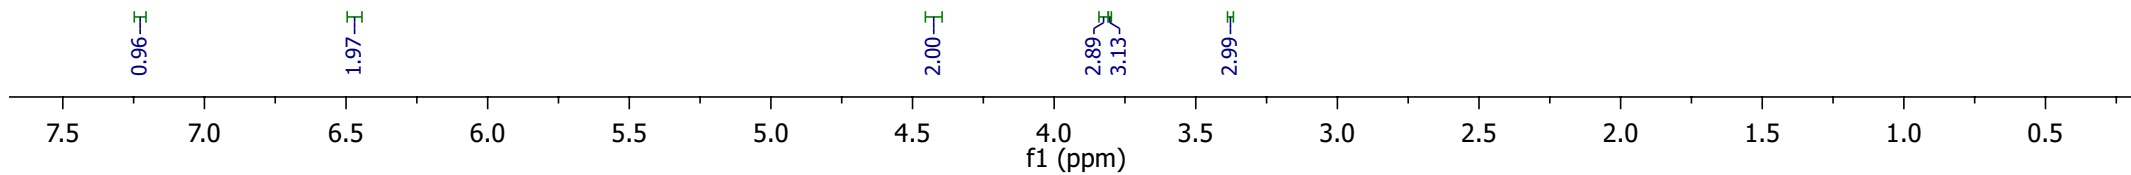

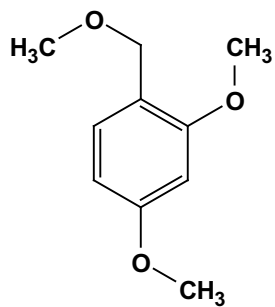

5m

<sup>13</sup>C NMR (125 MHz, CDCl<sub>3</sub>)

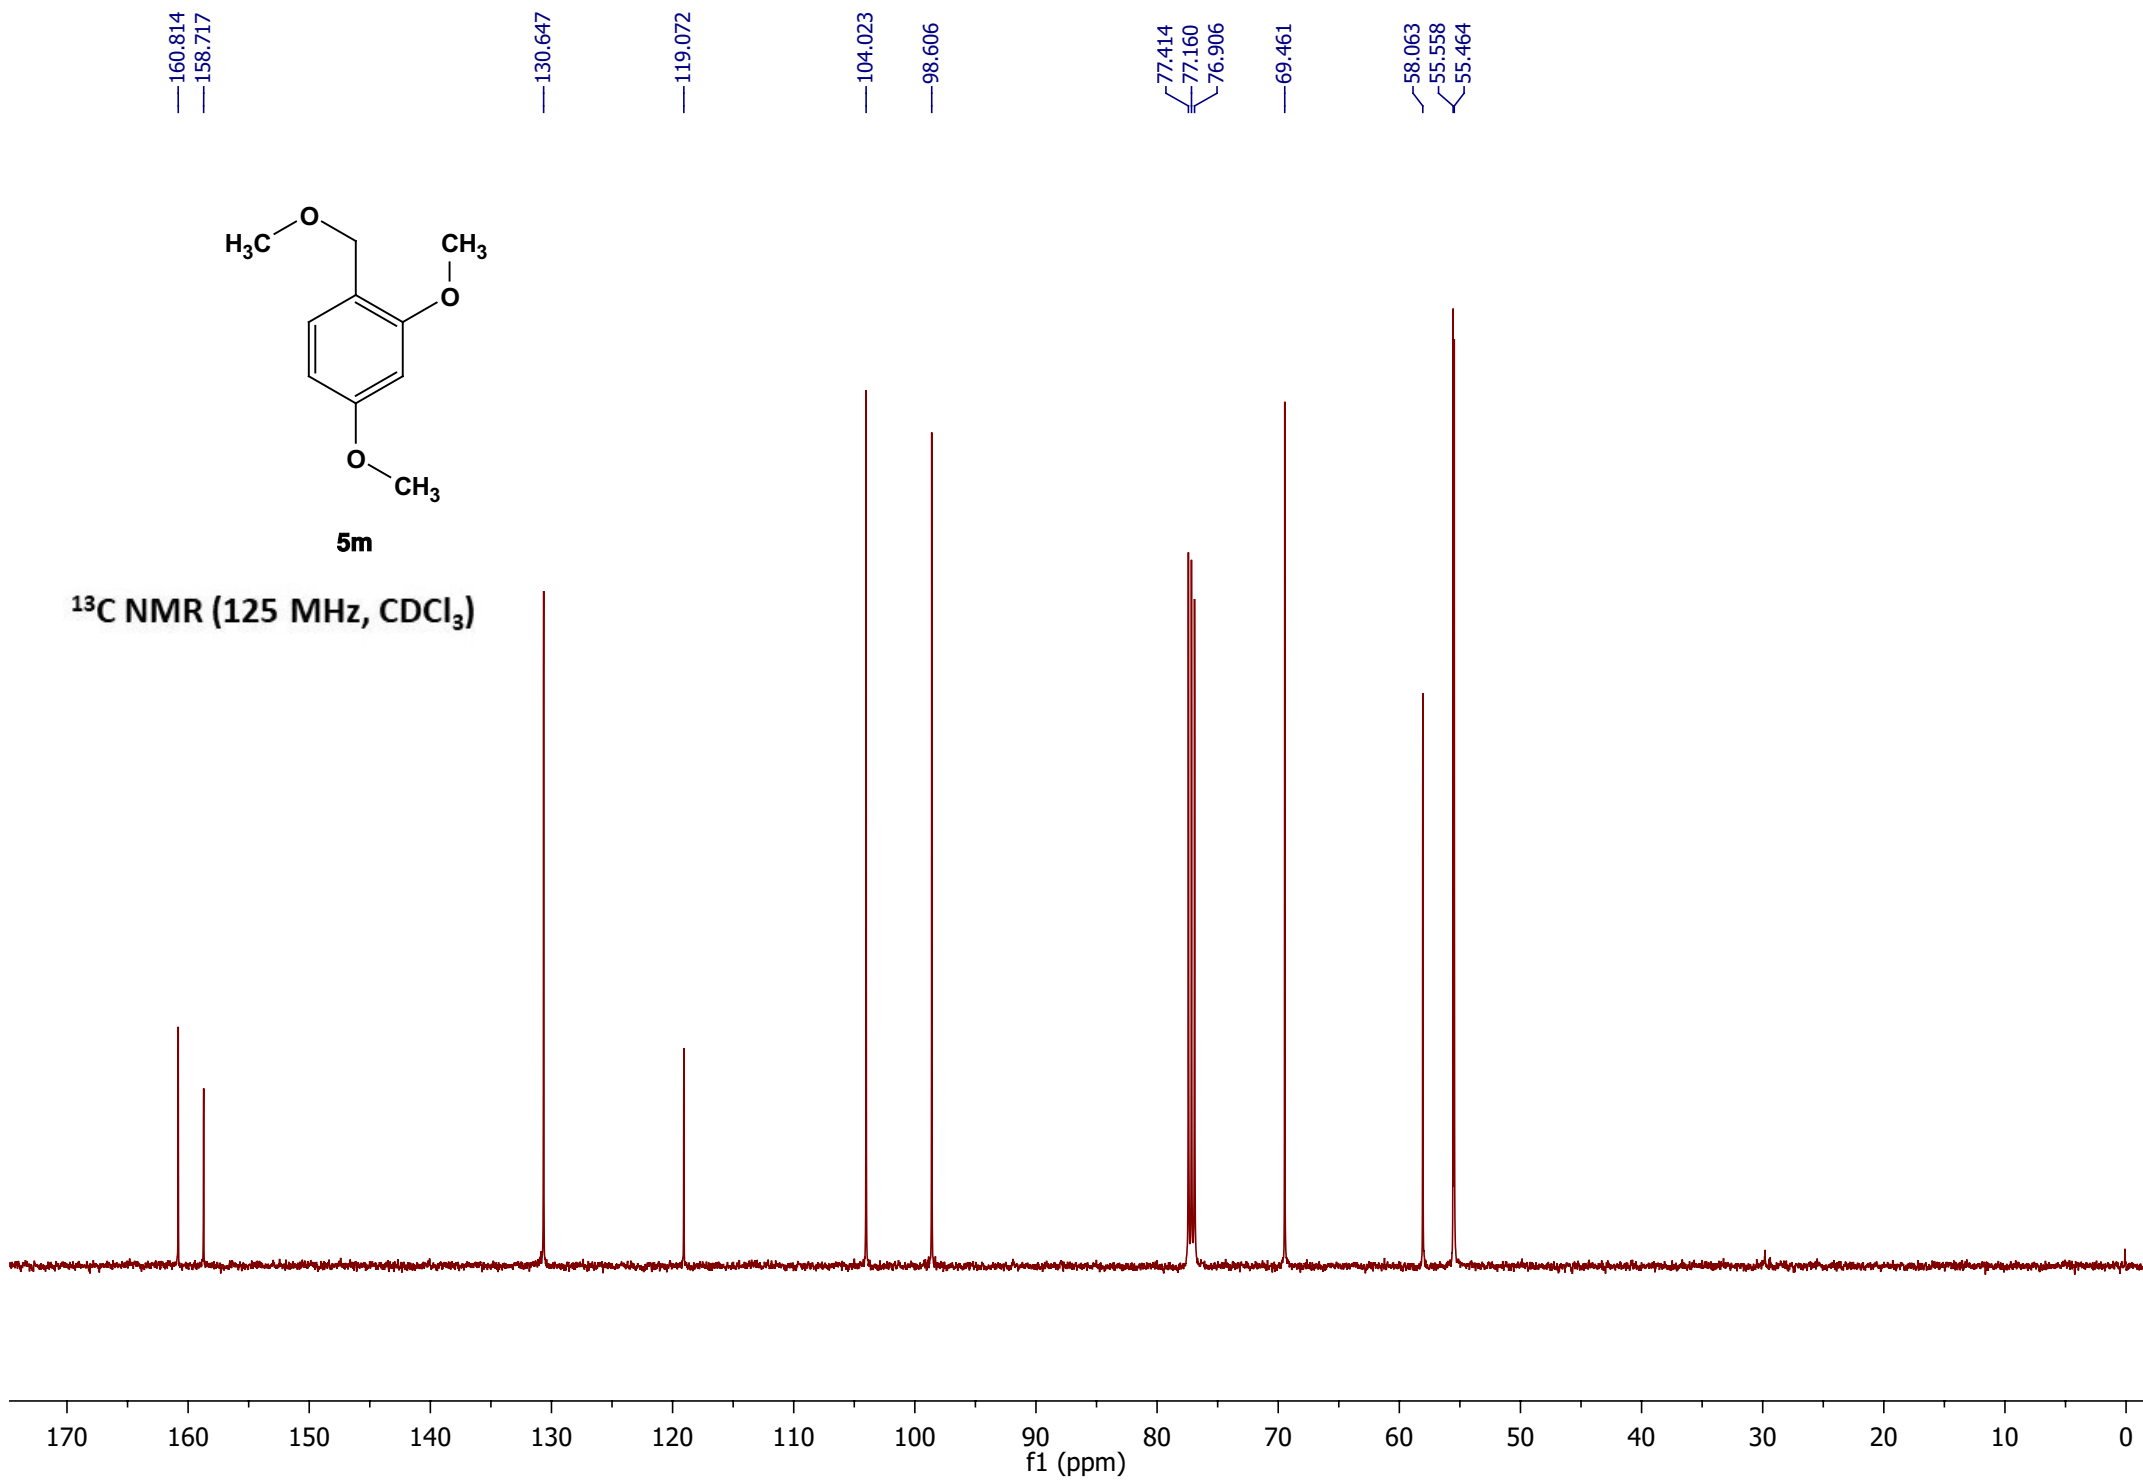

—7.260 Chloroform-d

—6.514

—6.368

—4.458

3.790  
3.697  
3.686  
3.673  
3.662  
3.649  
3.644

1.219  
1.207

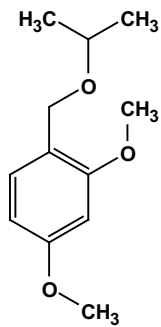

5n

<sup>1</sup>H NMR (500 MHz, CDCl<sub>3</sub>)

7.5 7.0 6.5 6.0 5.5 5.0 4.5 4.0 3.5 3.0 2.5 2.0 1.5 1.0 0.5

f1 (ppm)

1.98  
1.00

2.15

6.30  
1.03

6.38

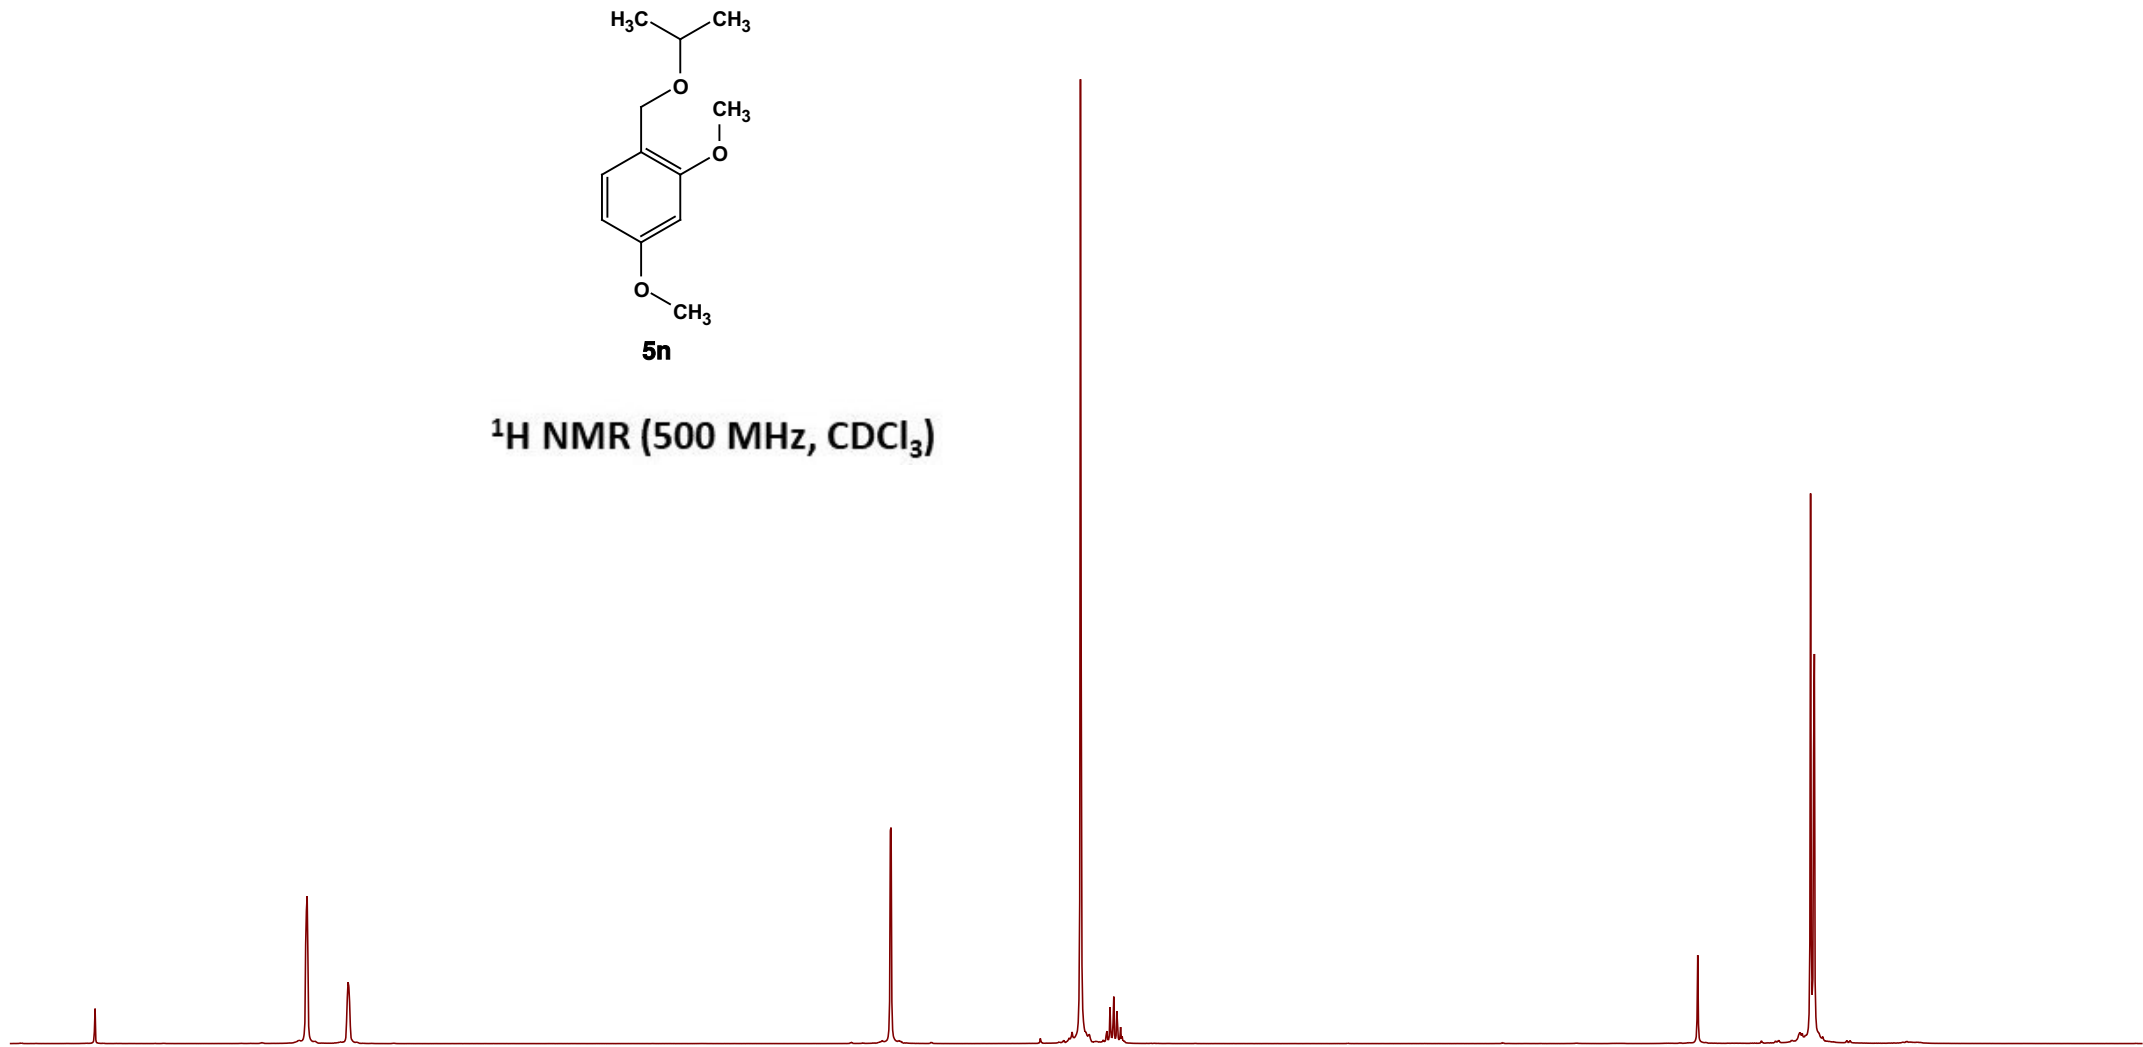

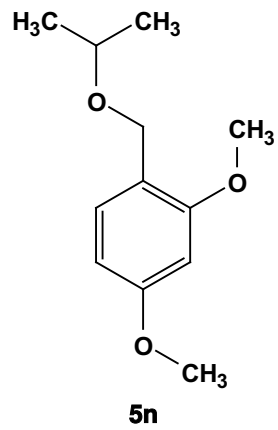

<sup>13</sup>C NMR (125 MHz, CDCl<sub>3</sub>)

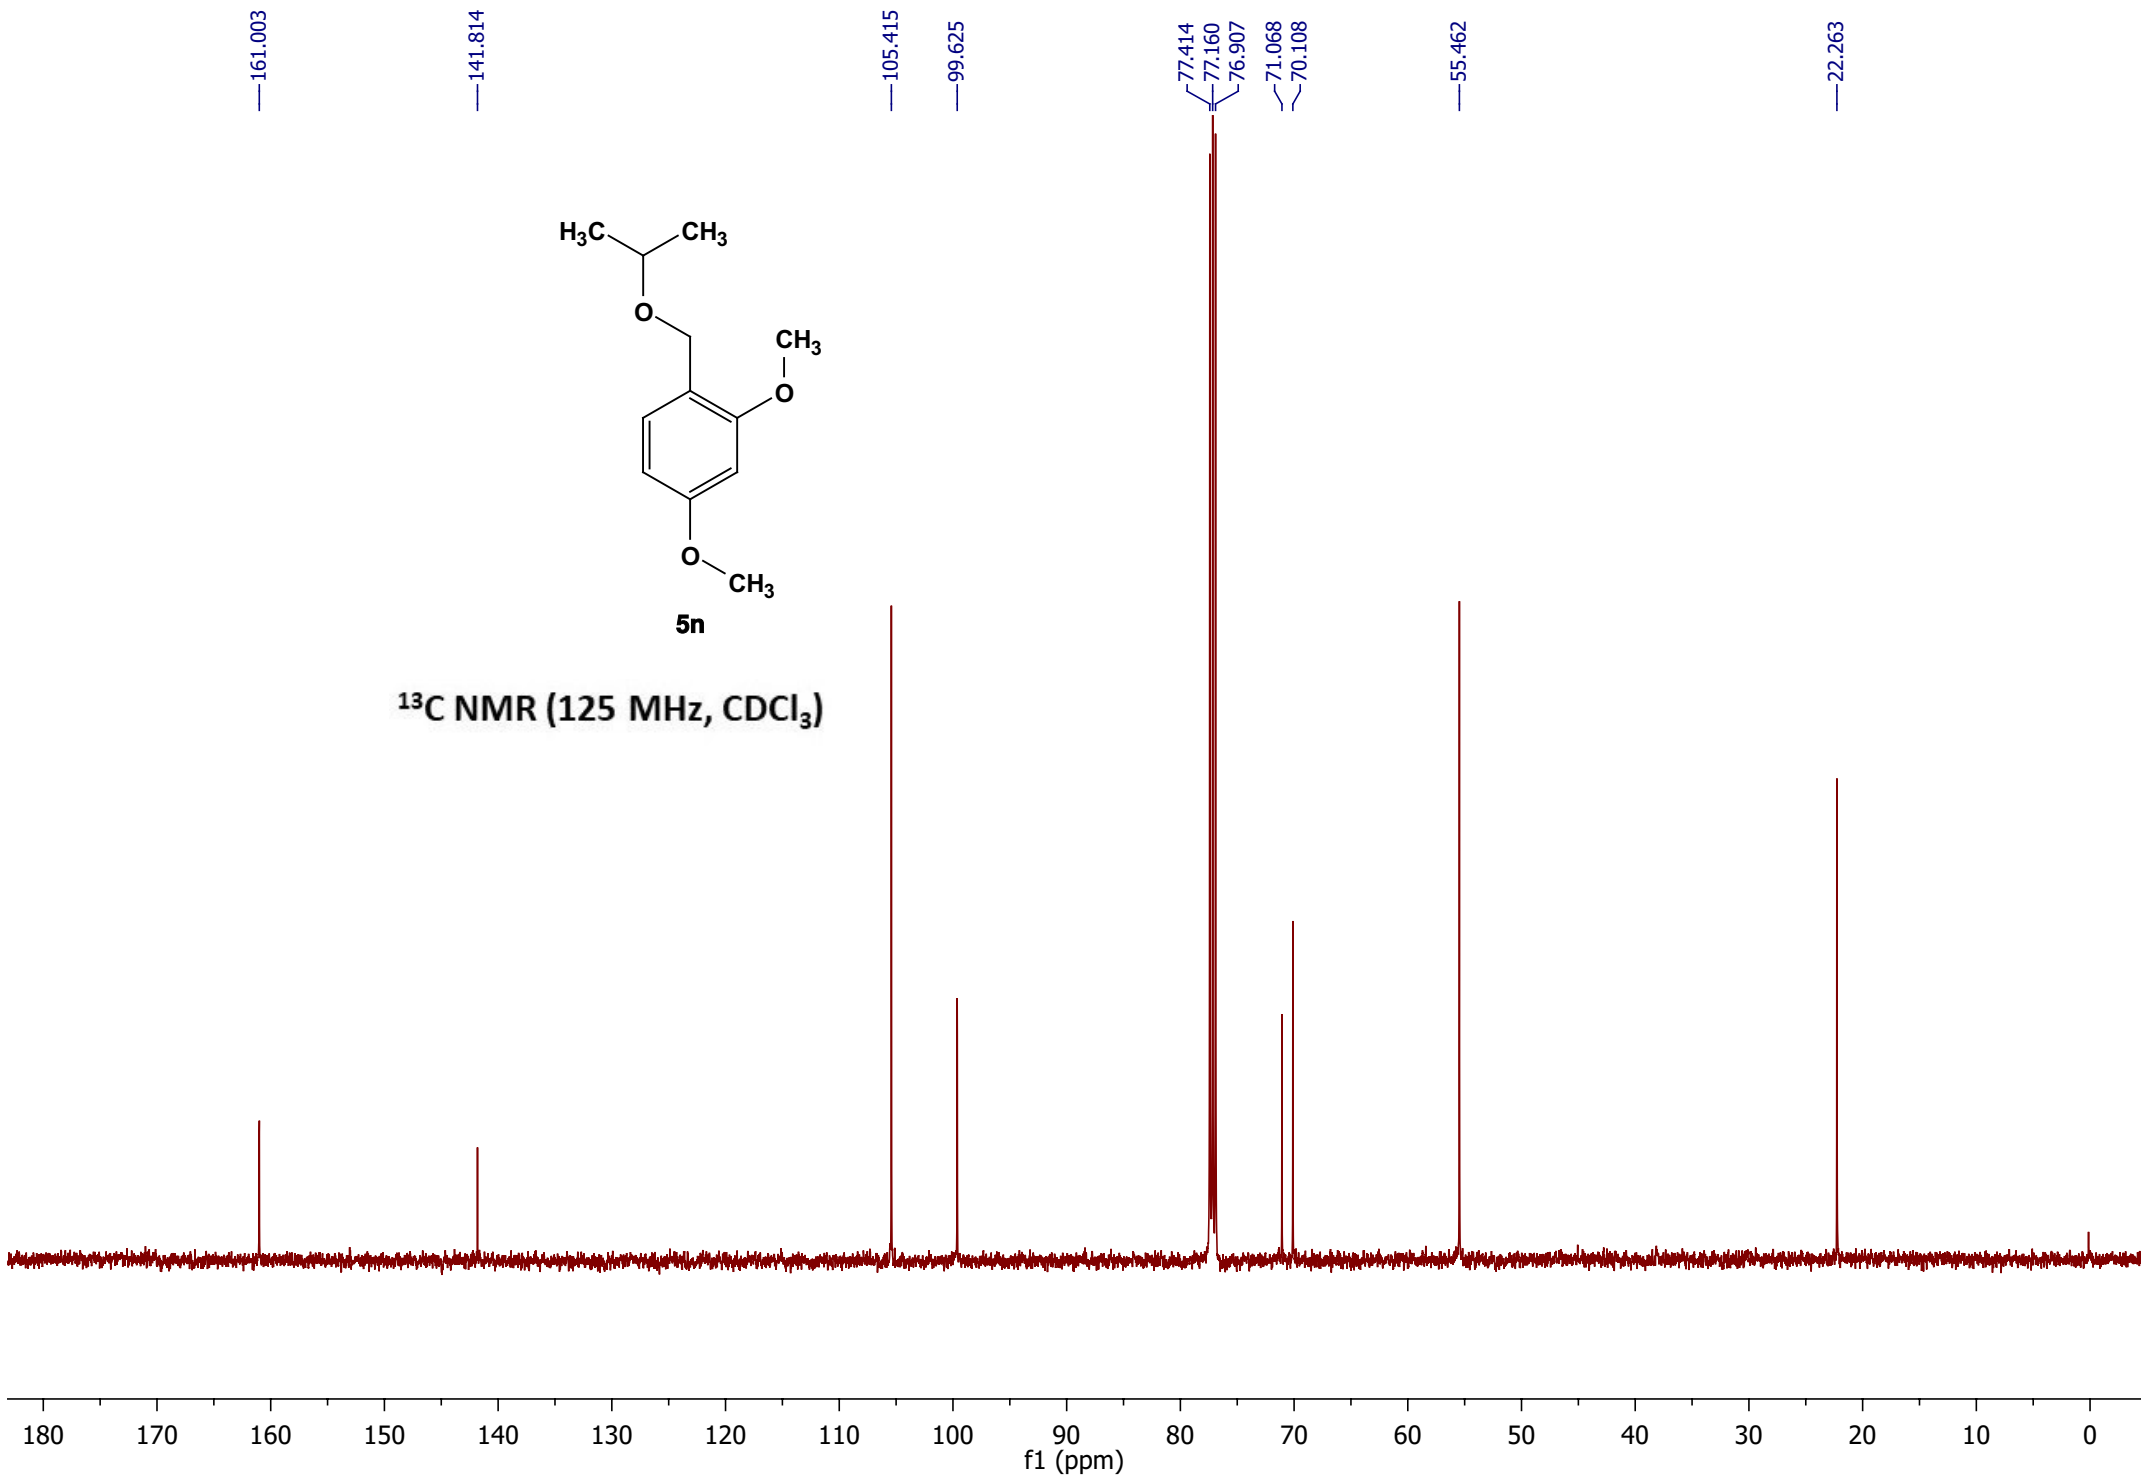

7.260  
7.165  
7.149  
7.059  
7.042  
6.952

6.236

3.879

3.711

2.335

2.038

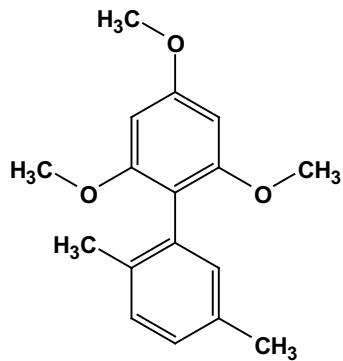

5o

<sup>1</sup>H NMR (500 MHz, CDCl<sub>3</sub>)

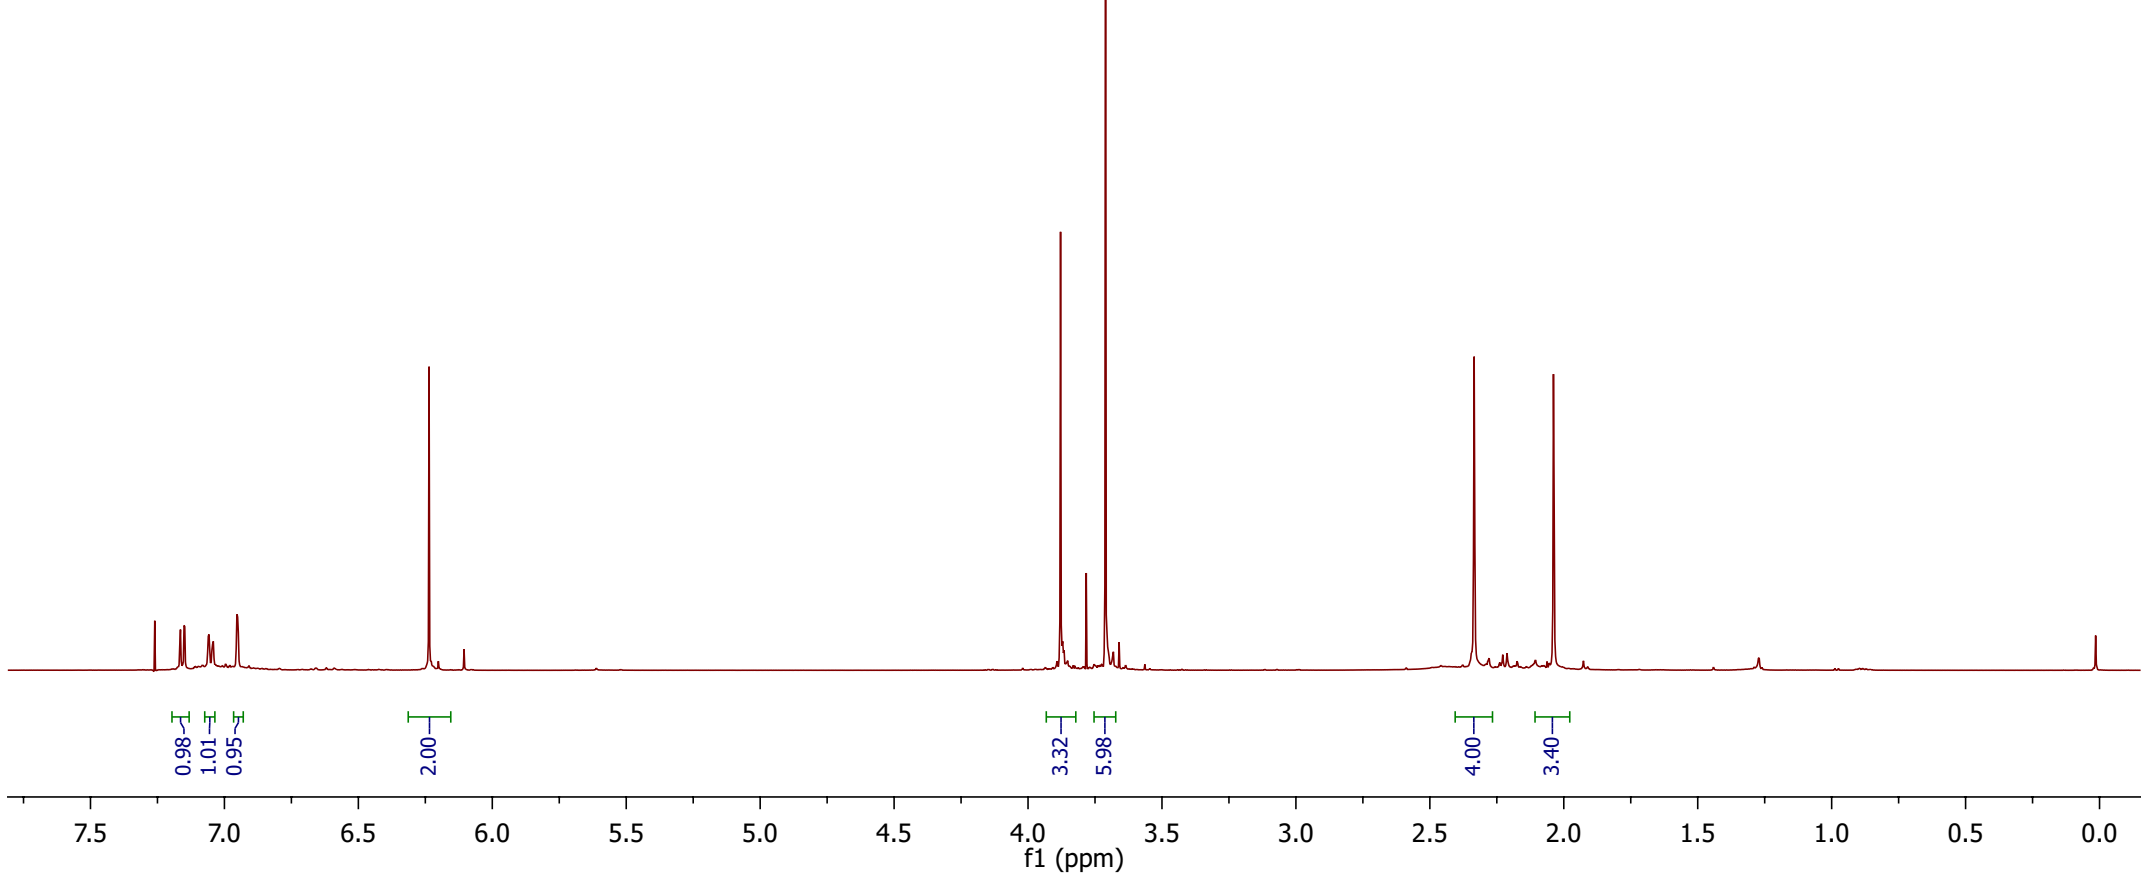

7.612  
7.596  
7.576  
7.561  
7.447  
7.432  
7.417  
7.345  
7.330  
7.316

6.440  
6.424

4.004  
3.999

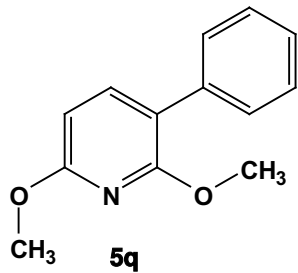

<sup>1</sup>H NMR (500 MHz, CDCl<sub>3</sub>)

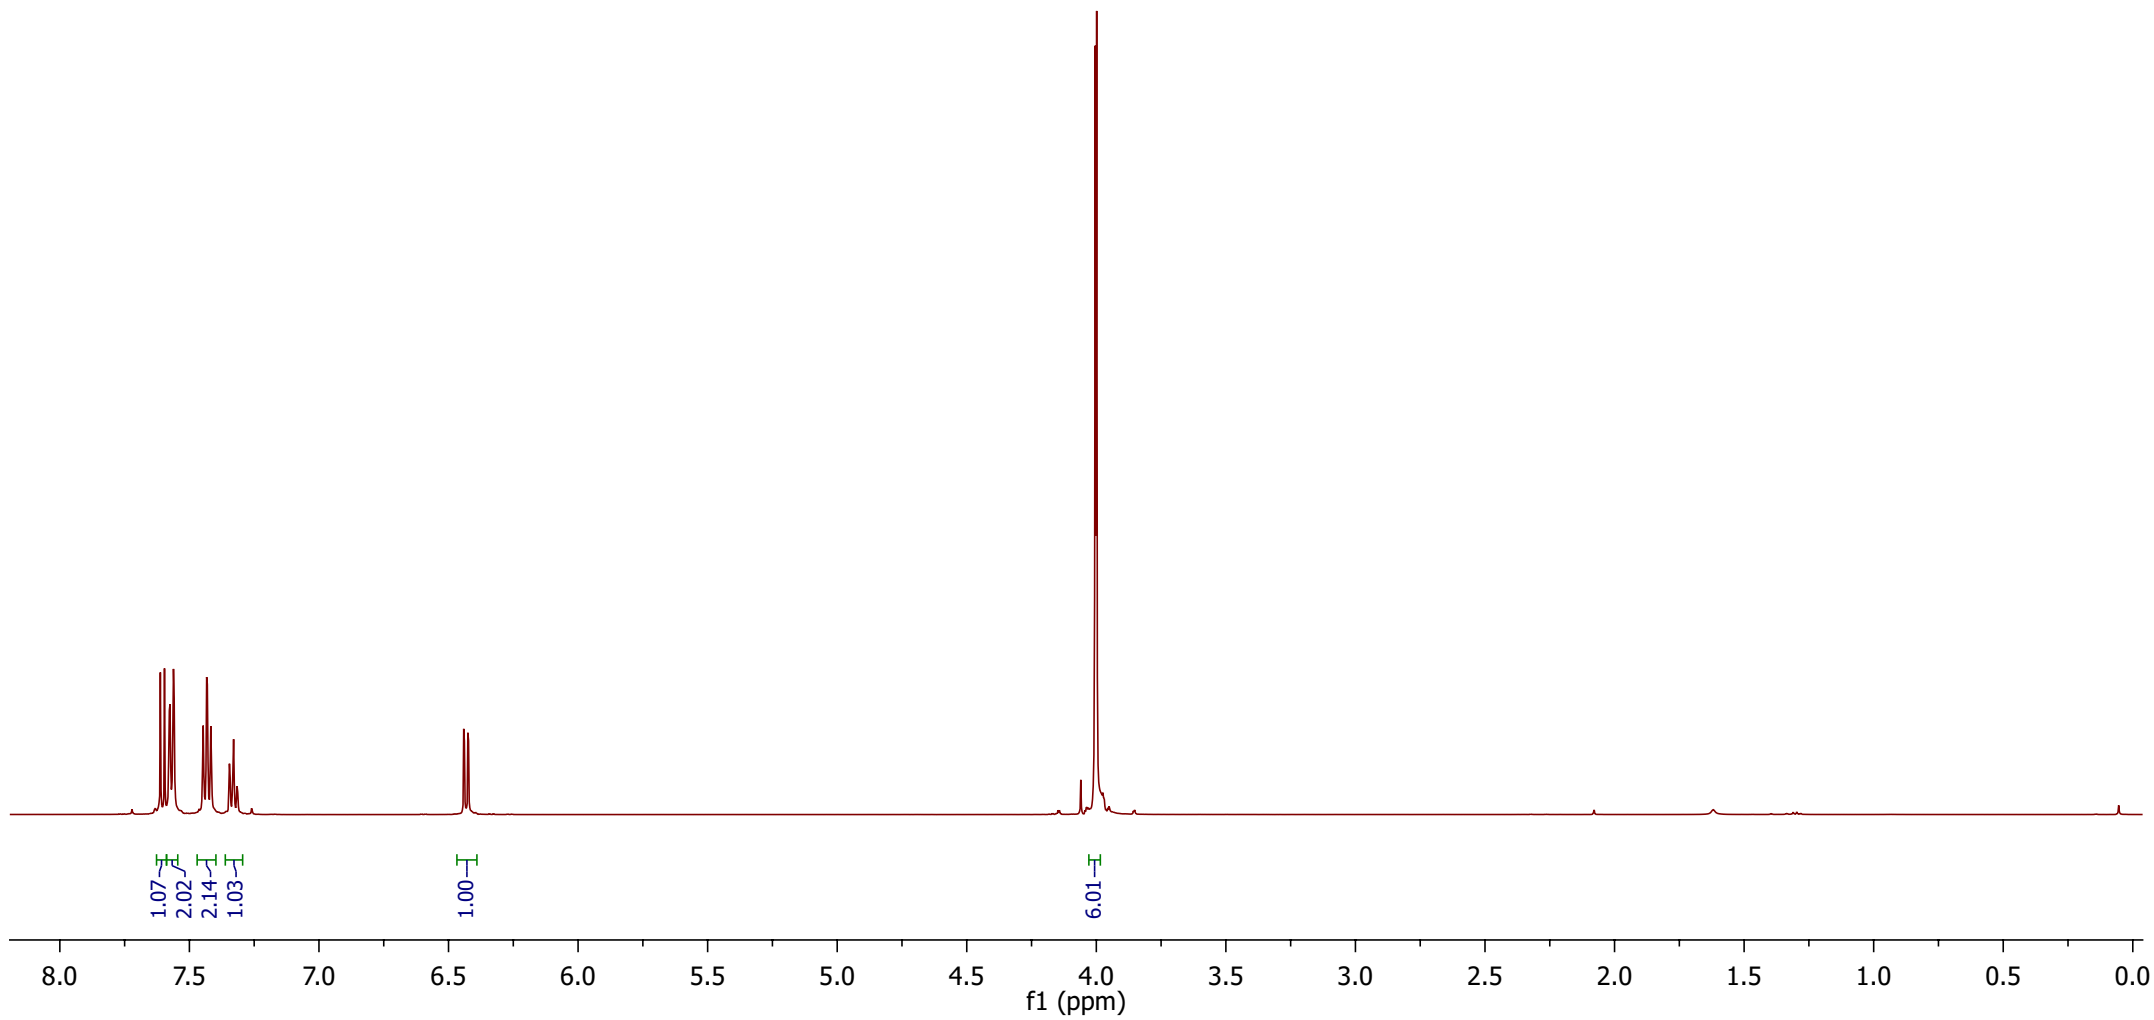

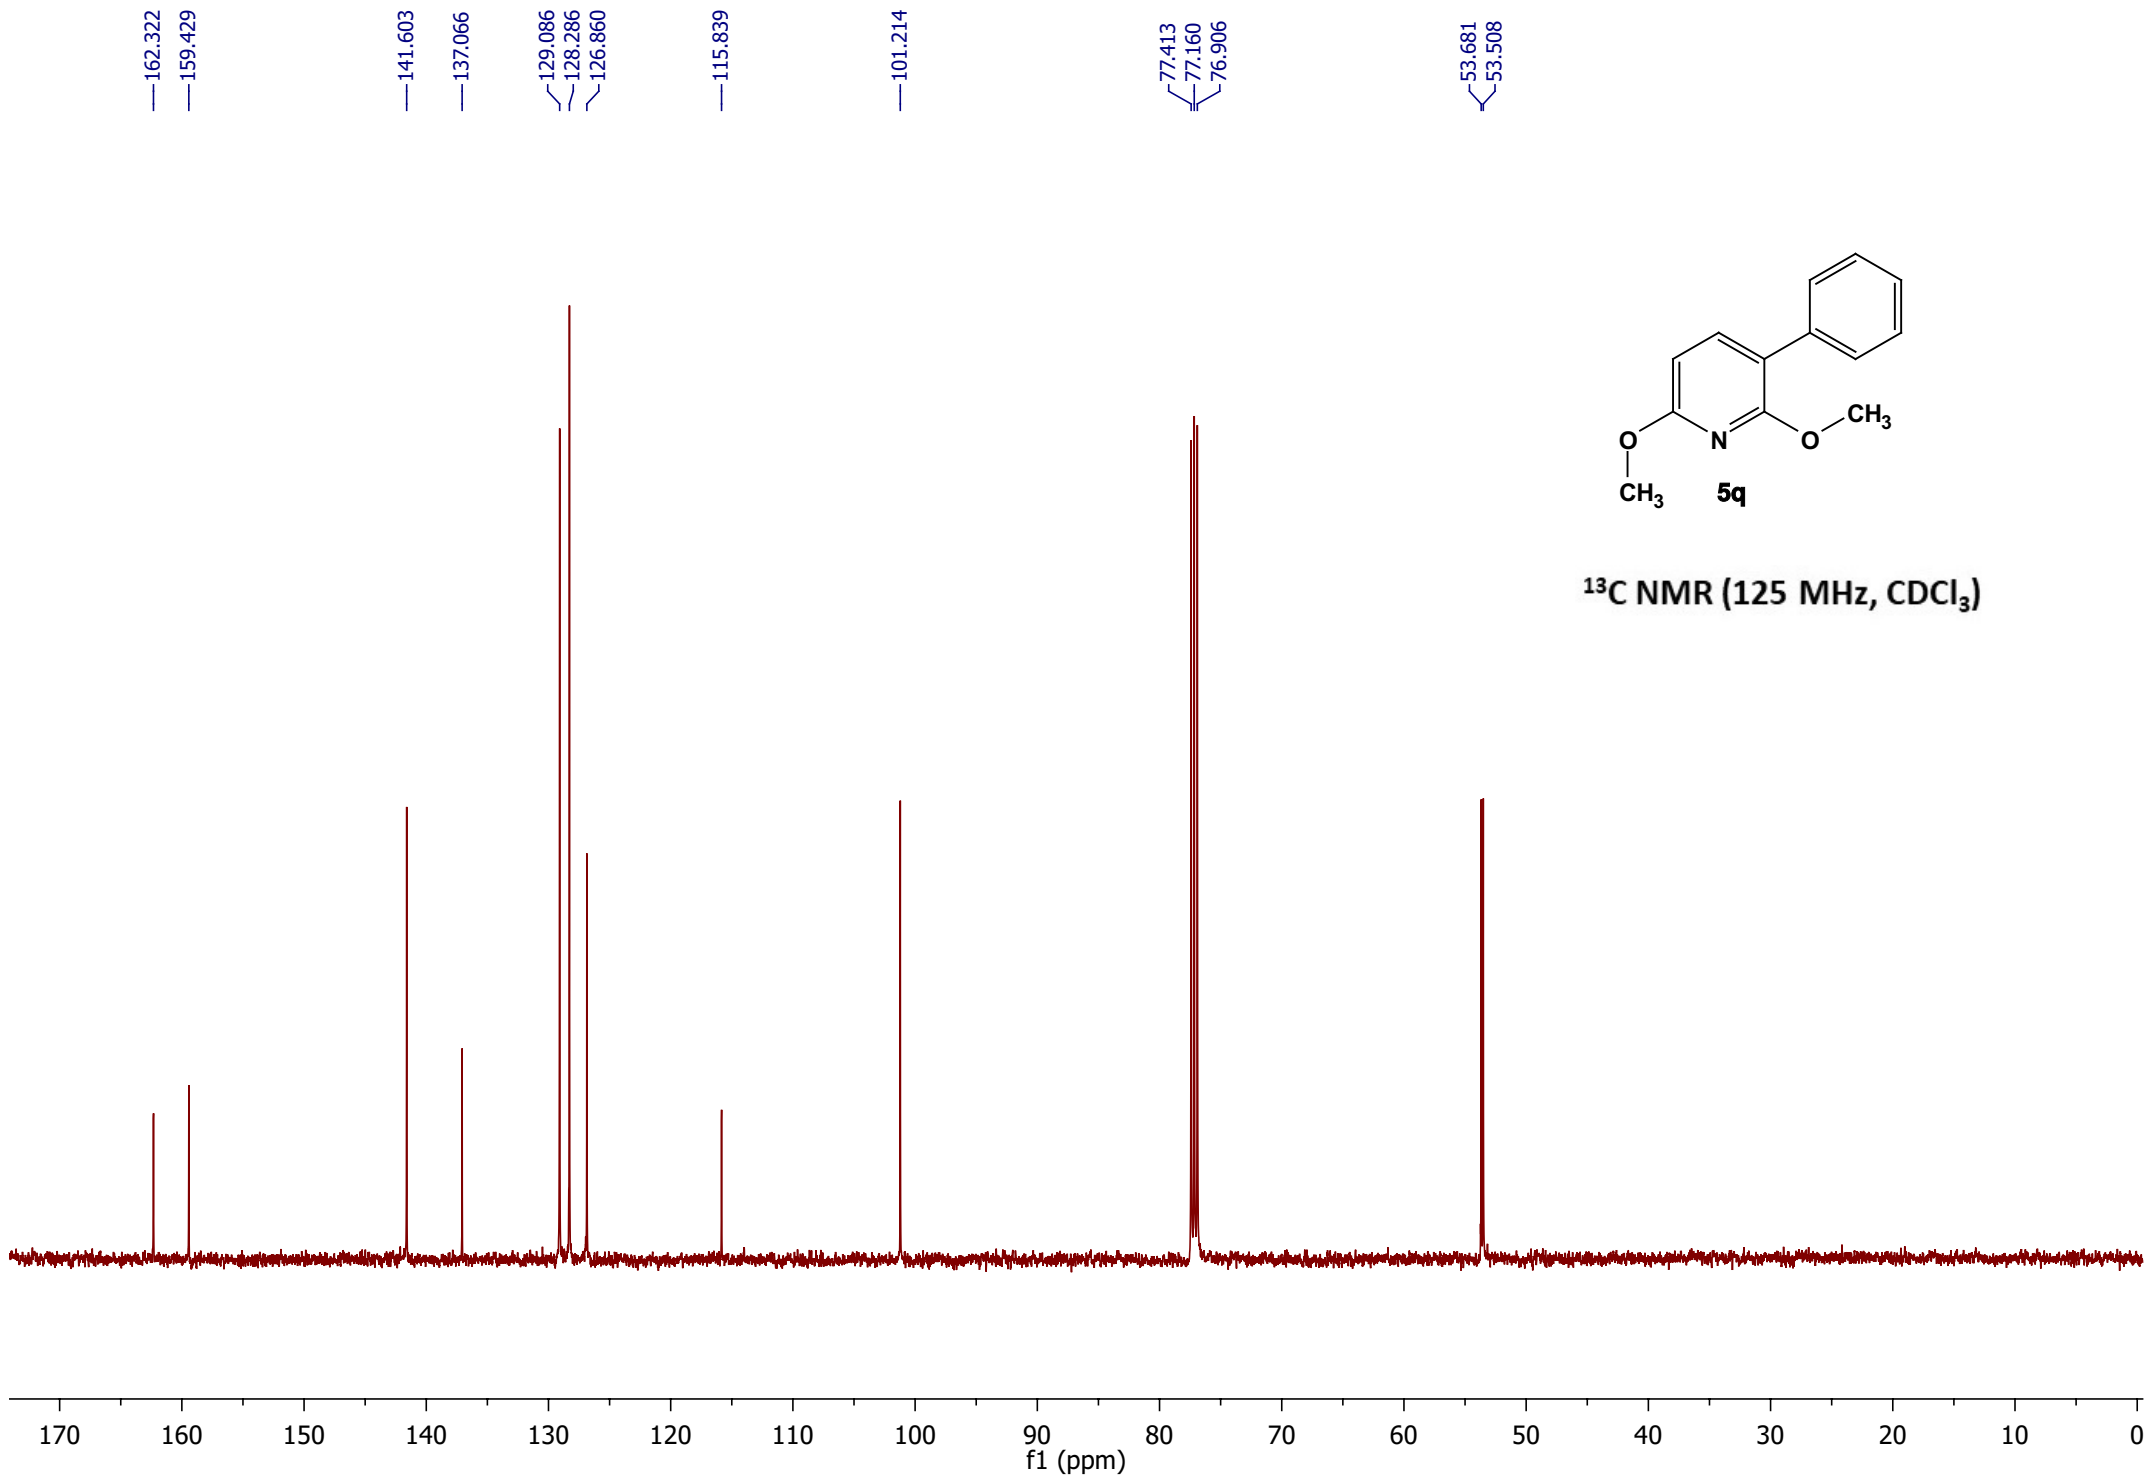



7.929  
7.912  
7.758  
7.754  
7.744  
7.740  
7.458  
7.446  
7.439  
7.434  
7.428  
7.421  
7.409  
7.260  
7.089

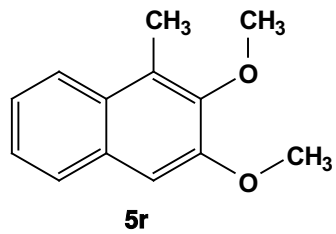

4.004  
3.914

2.647

<sup>1</sup>H NMR (500 MHz, CDCl<sub>3</sub>)

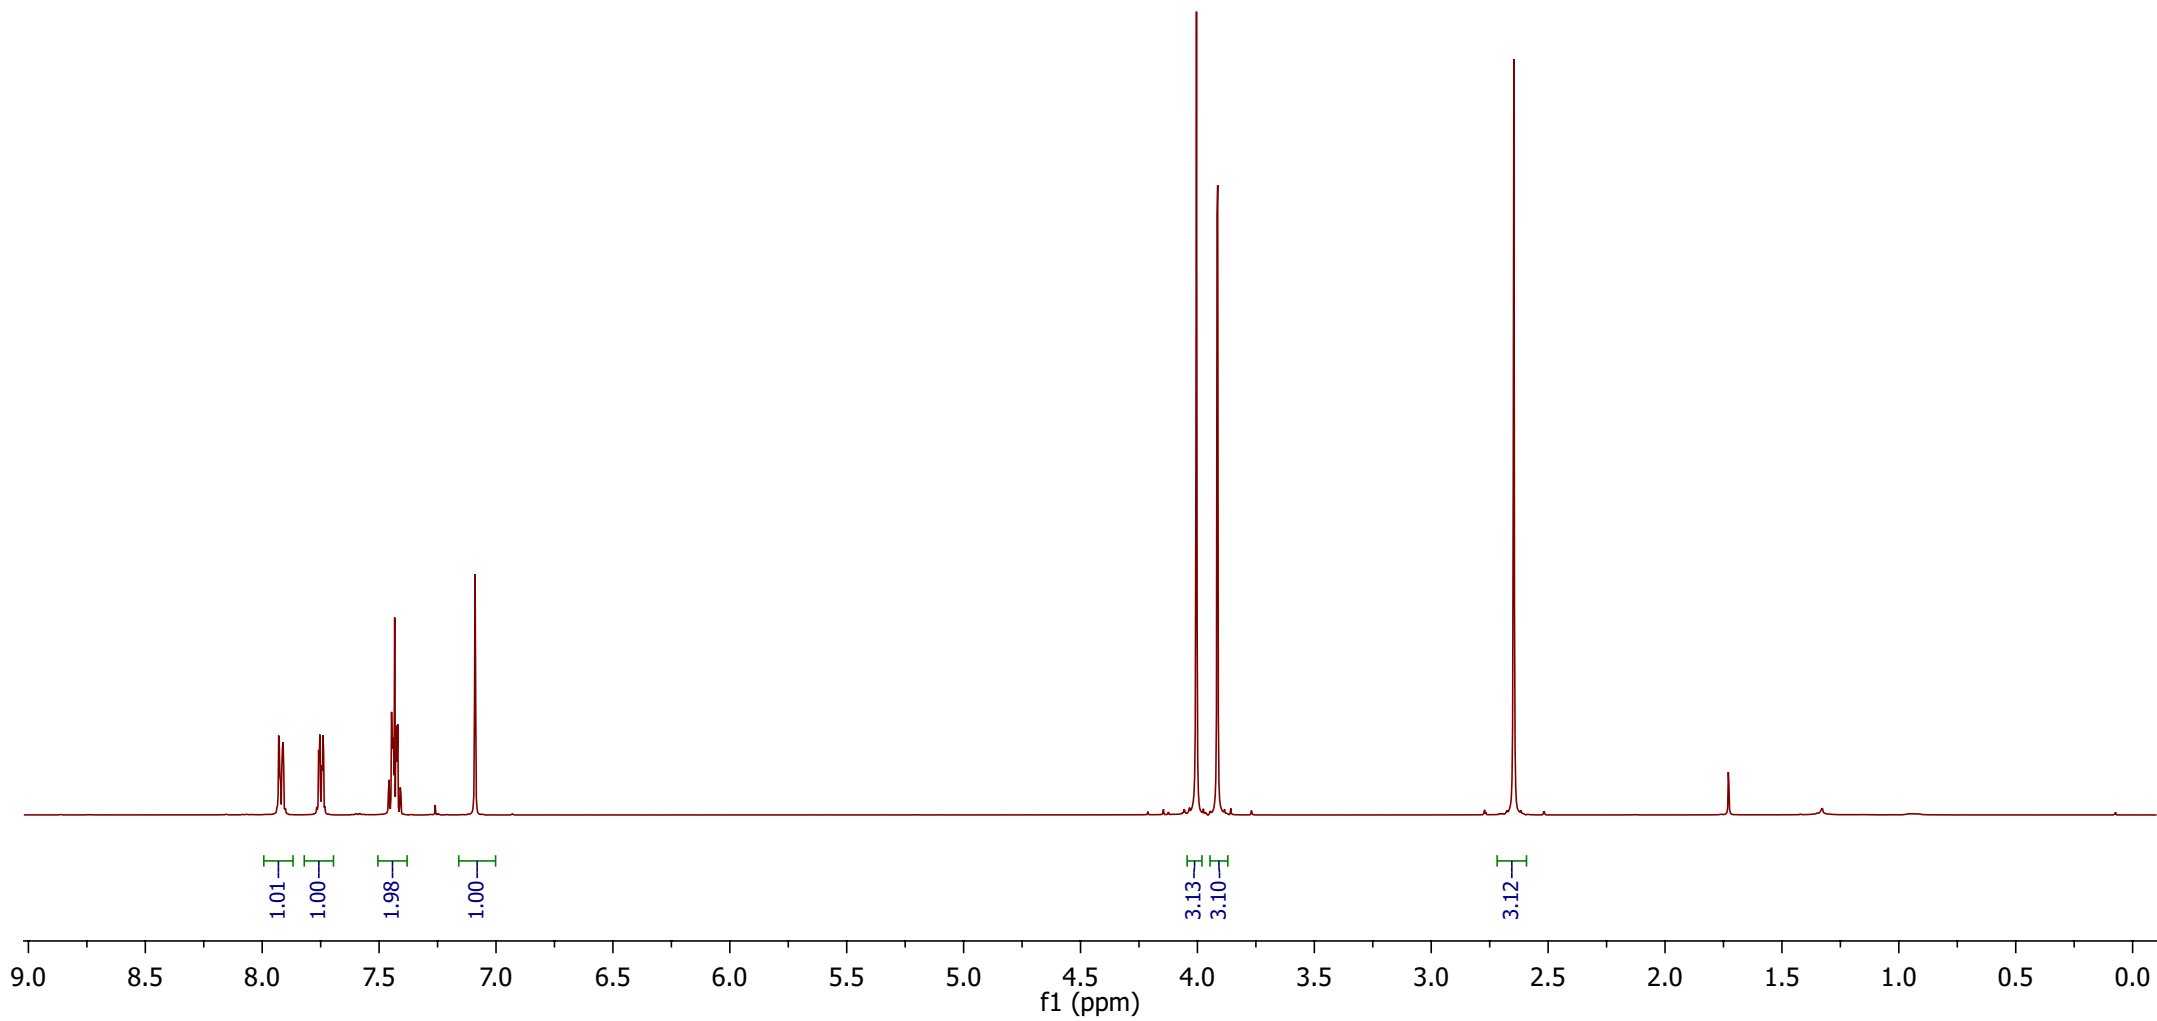

—152.313

—147.088

—131.345

—128.787

—127.067

—126.155

—125.132

—123.952

—123.812

—105.135

—77.414

—77.160

—76.905

—60.855

—55.525

—11.217

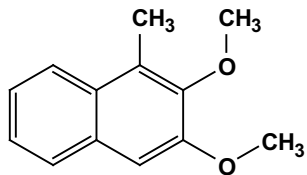

5r

<sup>13</sup>C NMR (125 MHz, CDCl<sub>3</sub>)

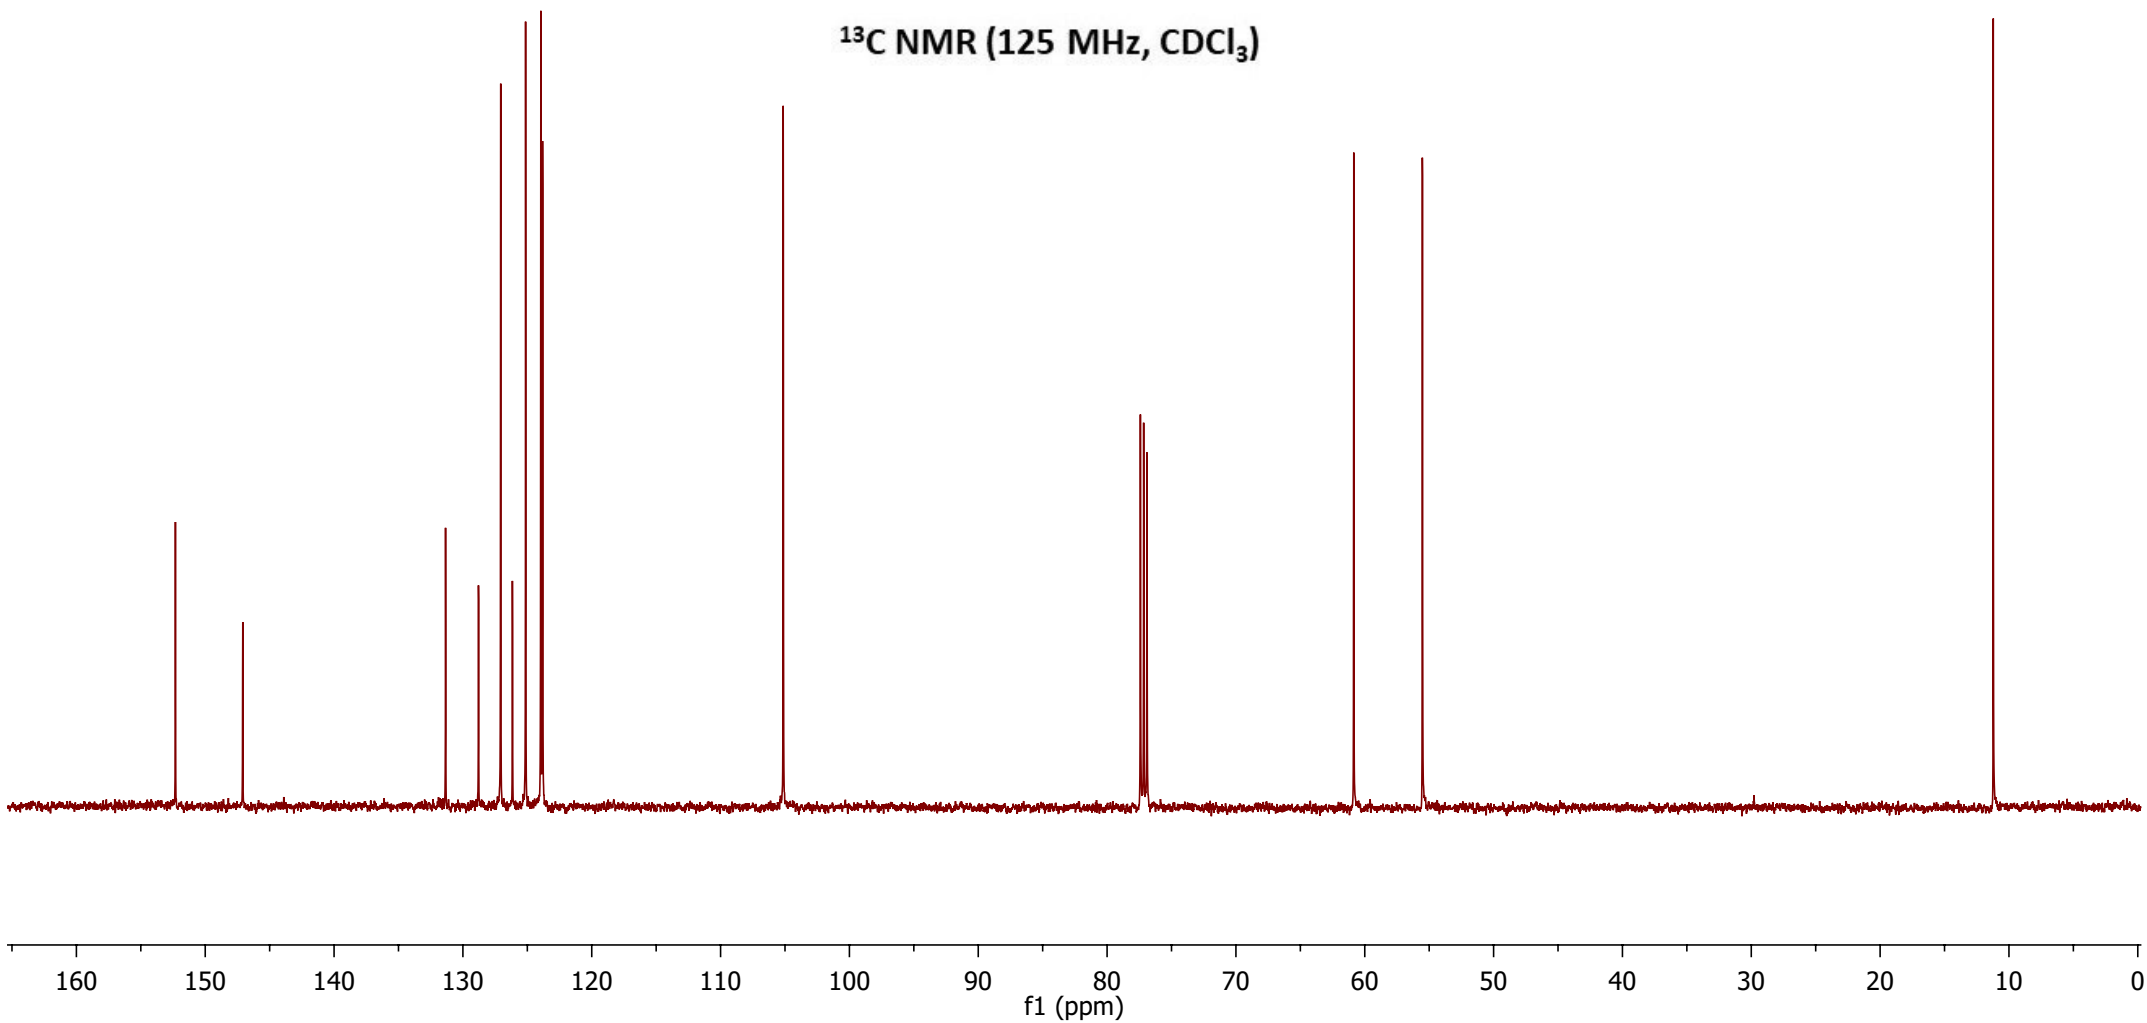

7.702  
7.695  
7.690  
7.684  
7.351  
7.345  
7.337

4.005

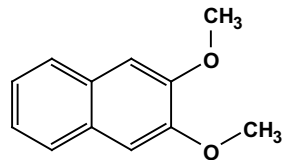

5s

<sup>1</sup>H NMR (500 MHz, CDCl<sub>3</sub>)

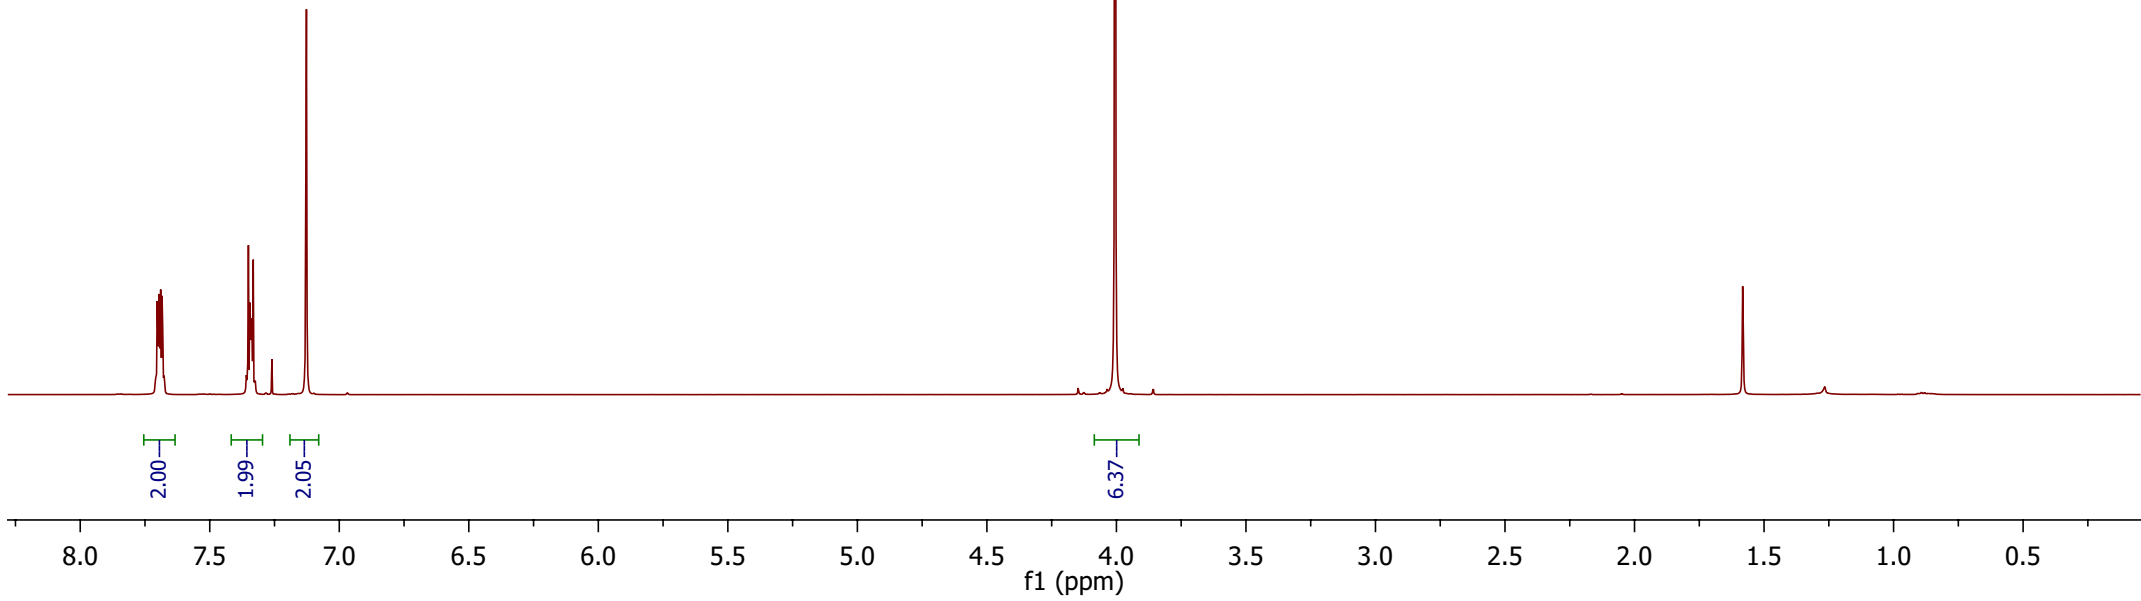

—149.620

—129.336

—126.431

—124.330

—106.479

—77.415

—77.160

—76.907

—55.975

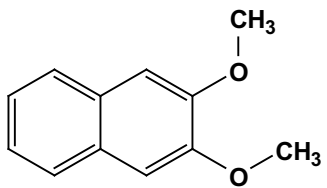

**5s**

**<sup>13</sup>C NMR (125 MHz, CDCl<sub>3</sub>)**

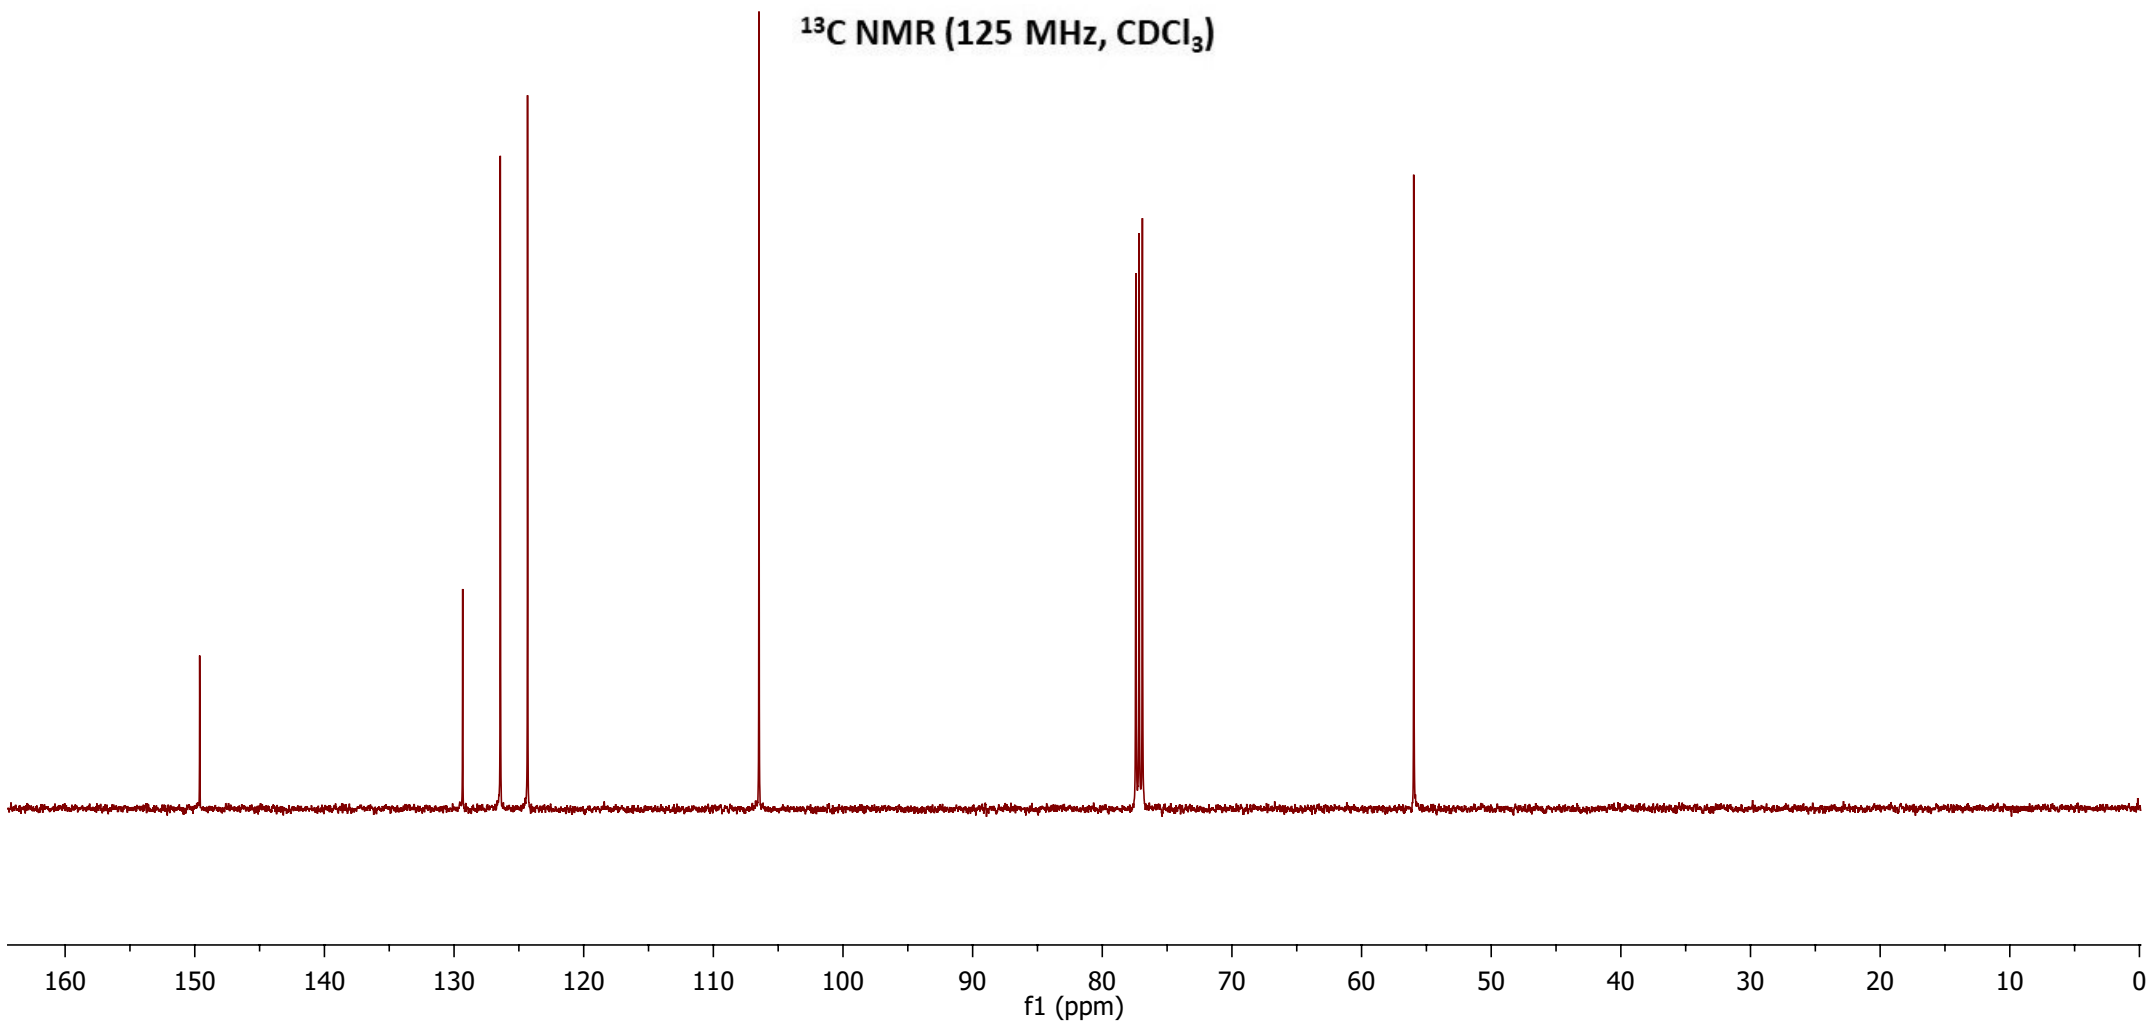

7.761  
7.745  
7.513  
7.499  
7.484  
7.454  
7.438  
7.432  
7.415  
7.399  
7.384  
7.368  
7.260  
7.247  
7.232  
7.224

4.030

3.622

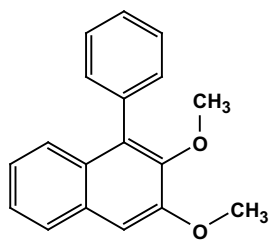

5t

<sup>1</sup>H NMR (500 MHz, CDCl<sub>3</sub>)

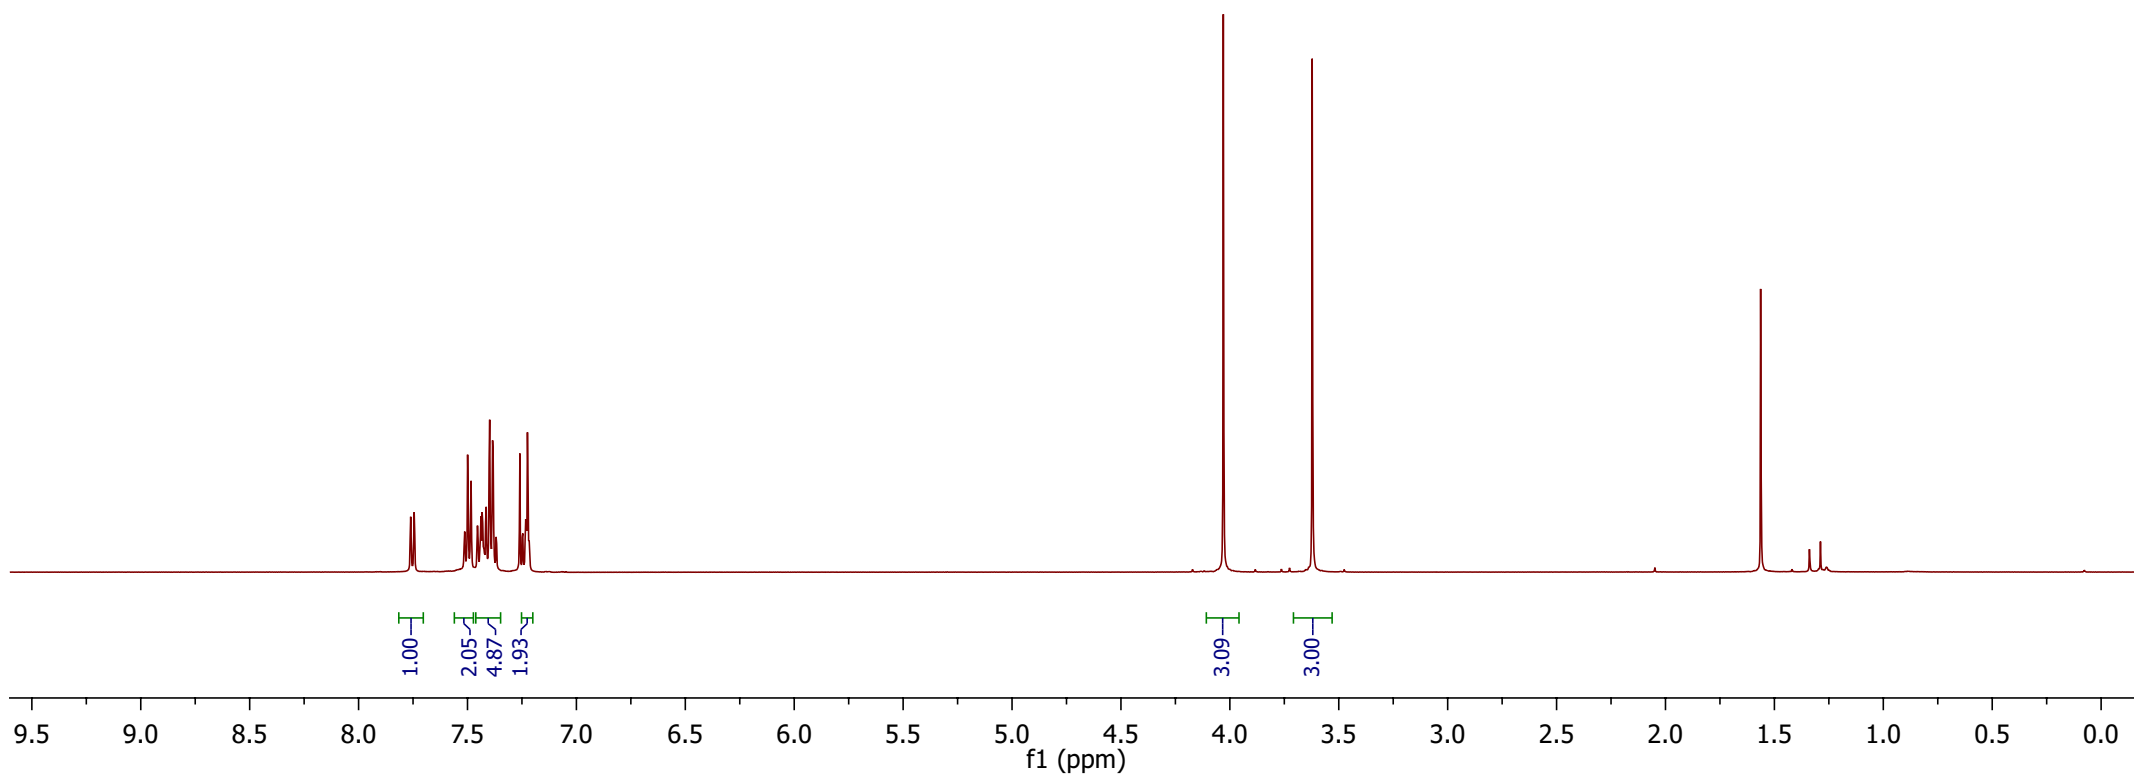

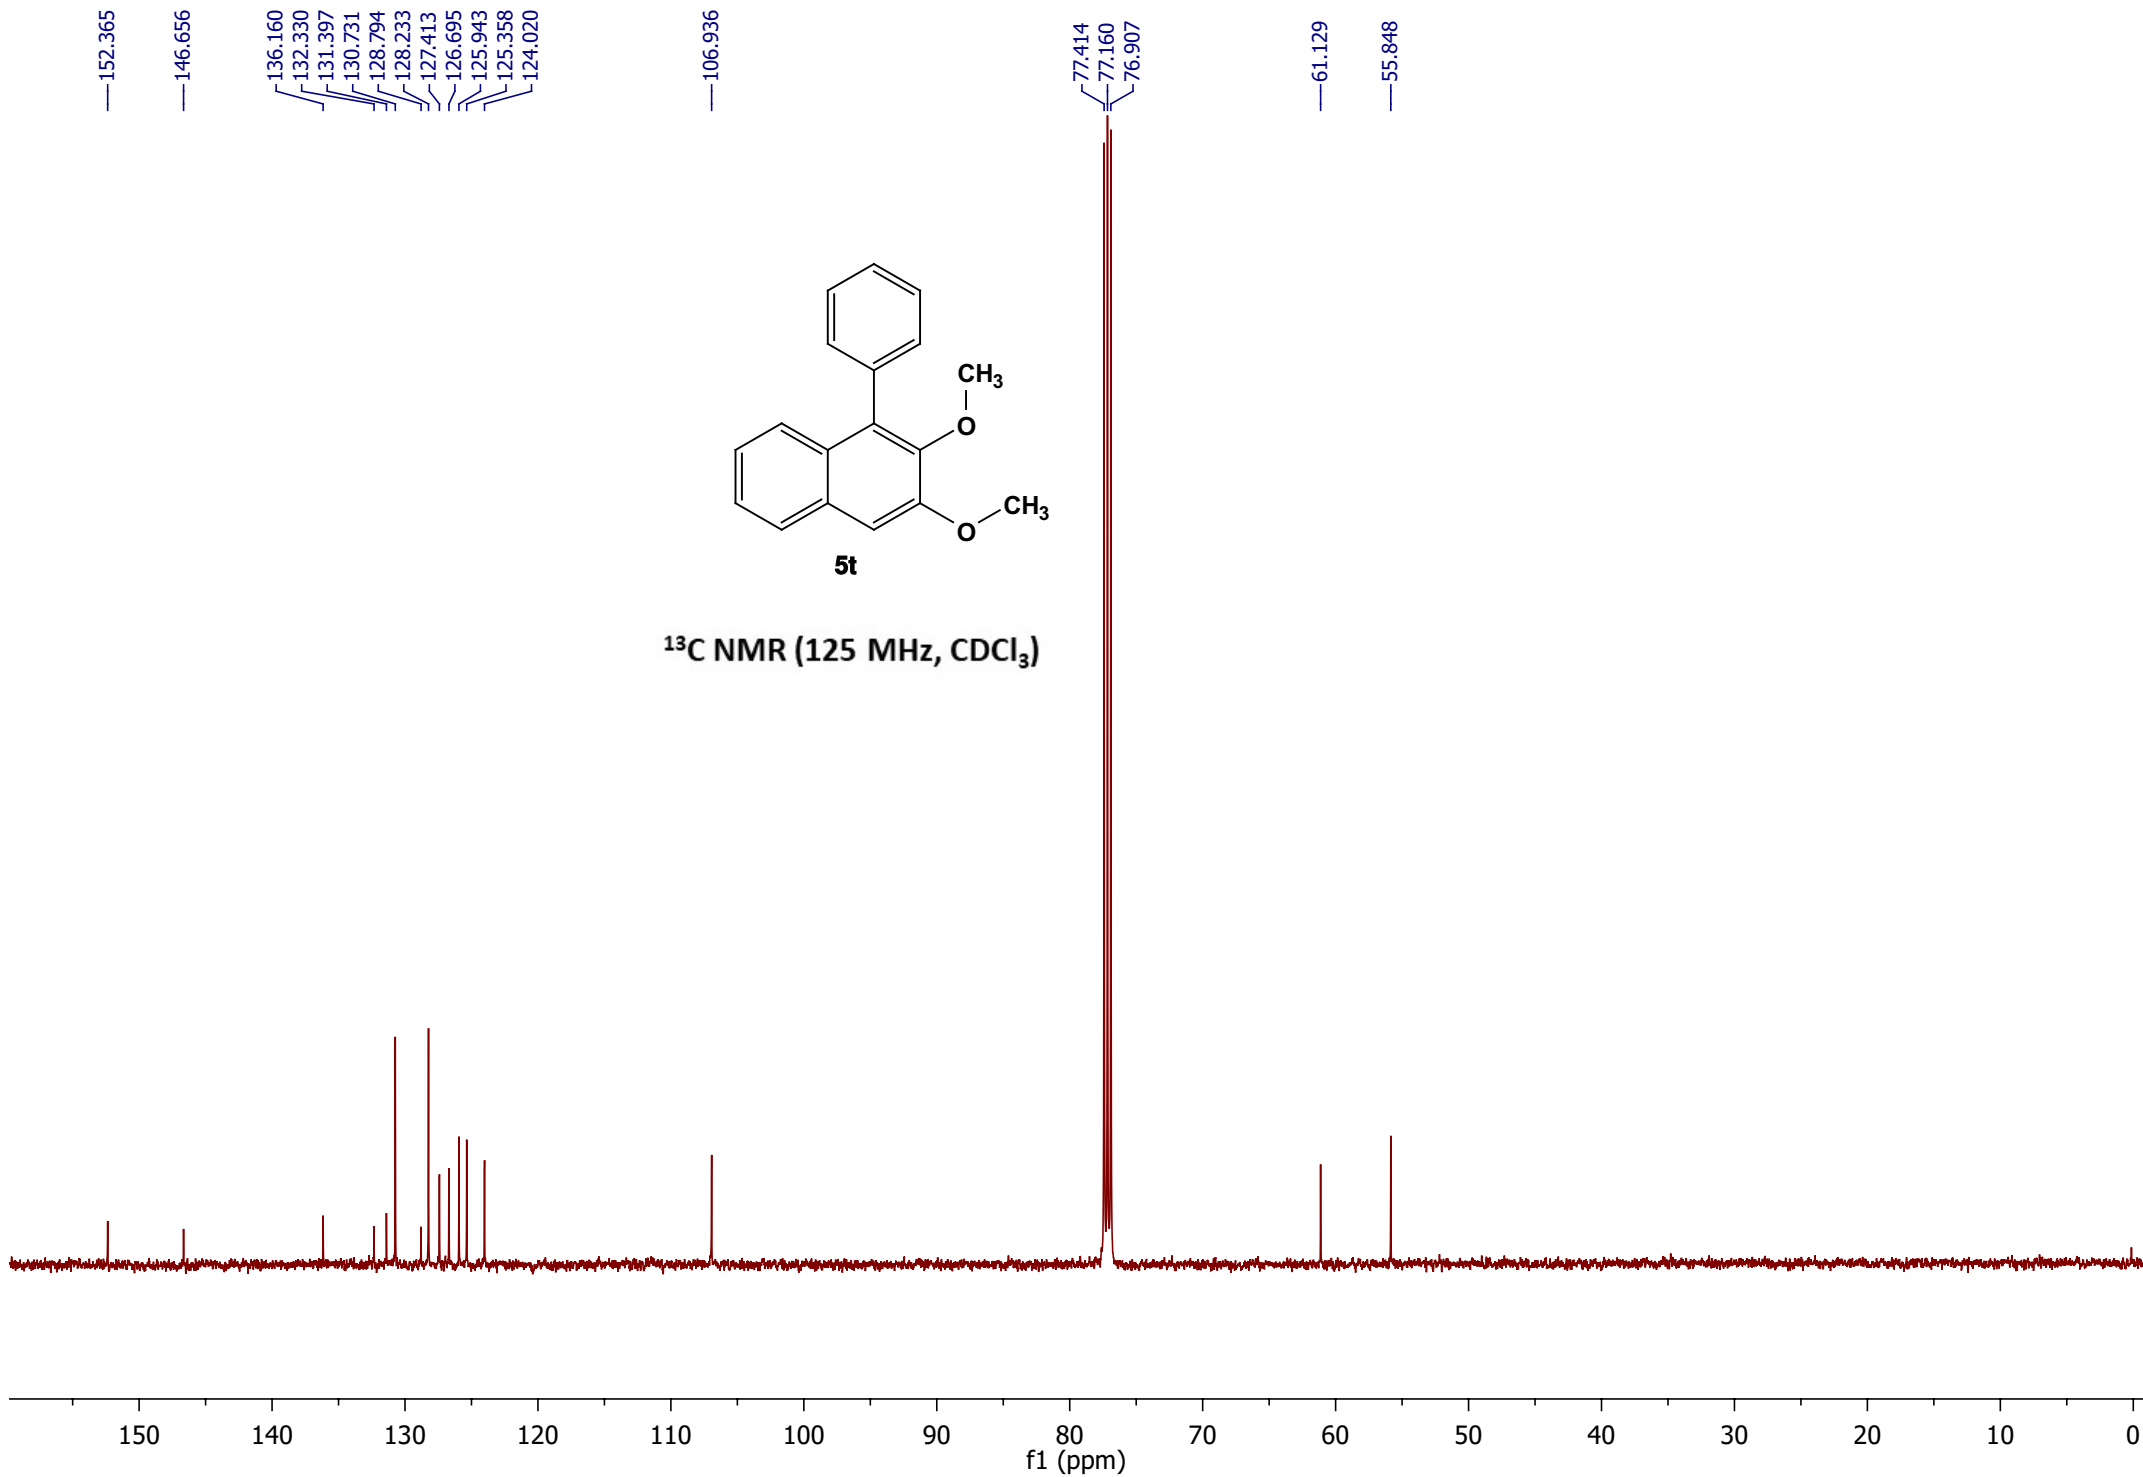

8.232  
8.226  
8.220  
8.213

7.526  
7.519  
7.514  
7.507  
7.260

6.709

3.970

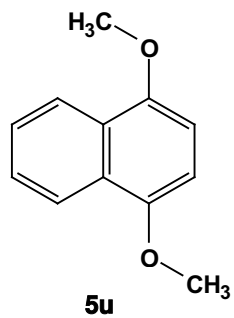

**<sup>1</sup>H NMR (500 MHz, CDCl<sub>3</sub>)**

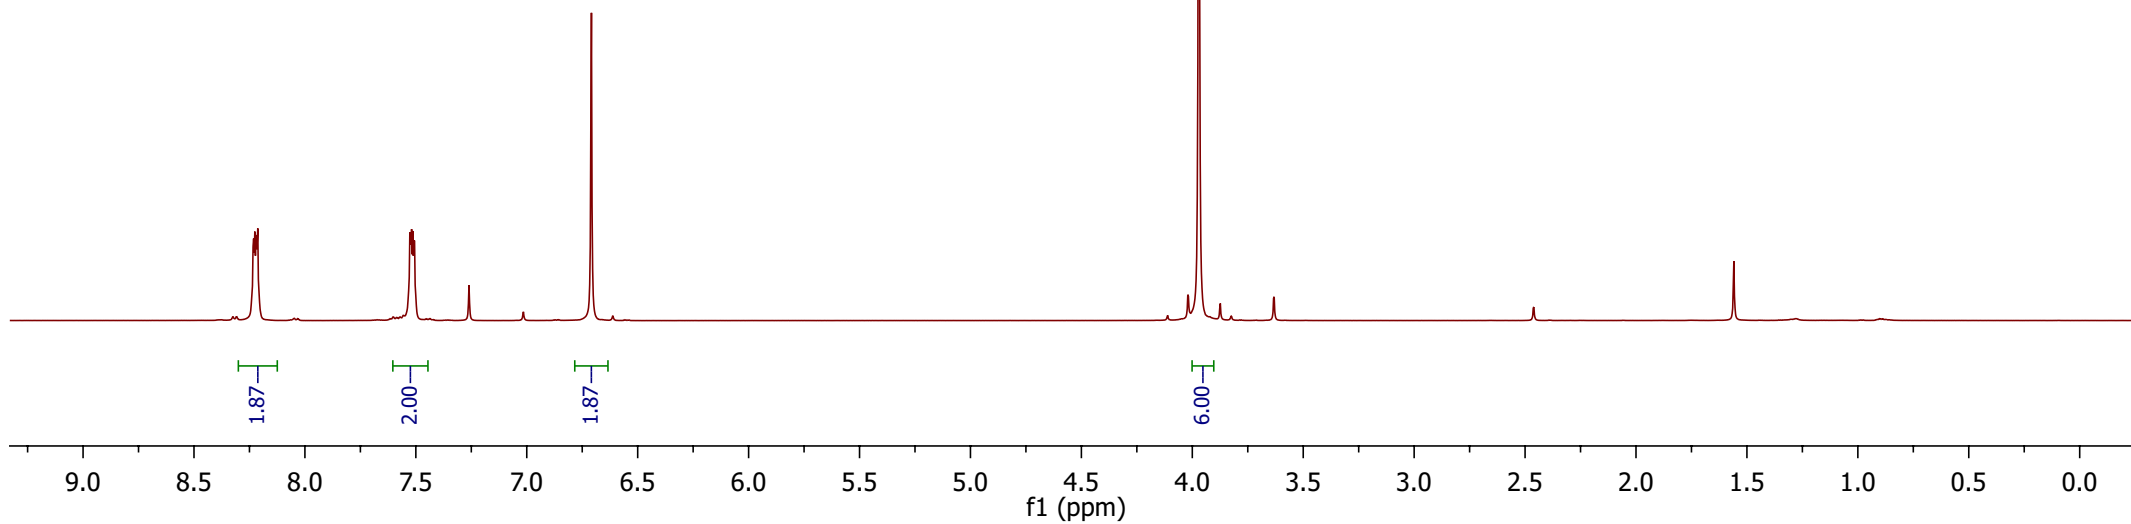

—149.623

—126.476  
—125.949  
—121.890

—103.317

—77.415  
—77.161  
—76.906

—55.814

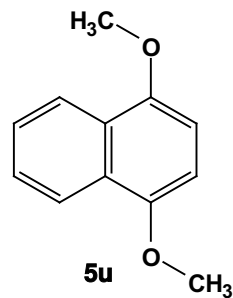

**<sup>13</sup>C NMR (125 MHz, CDCl<sub>3</sub>)**

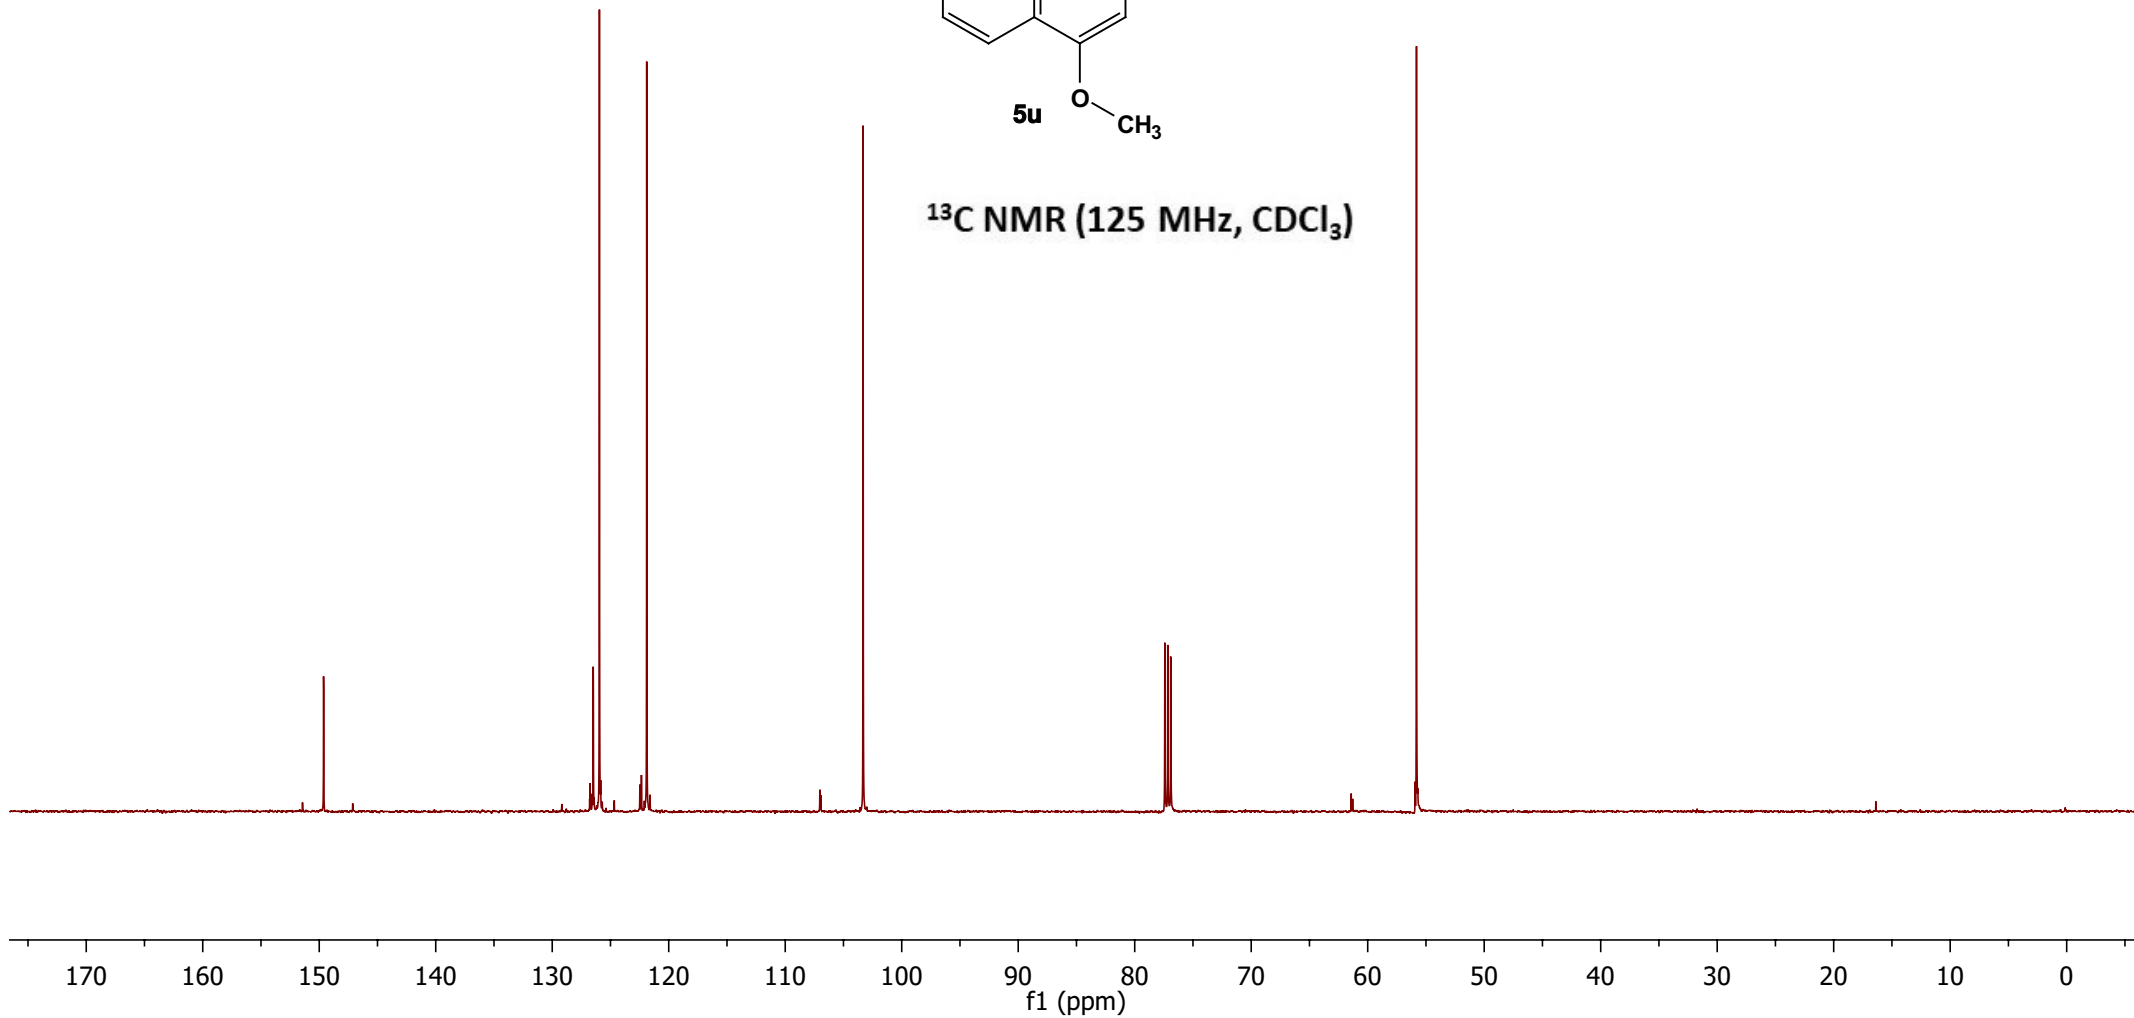



—7.260 Chloroform-d

—6.824

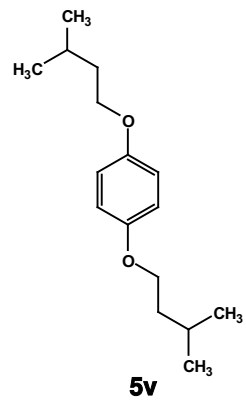

3.948  
3.935  
3.921

1.869  
1.856  
1.842  
1.829  
1.815  
1.802  
1.788  
1.675  
1.662  
1.648  
1.634  
0.964  
0.951

<sup>1</sup>H NMR (500 MHz, CDCl<sub>3</sub>)

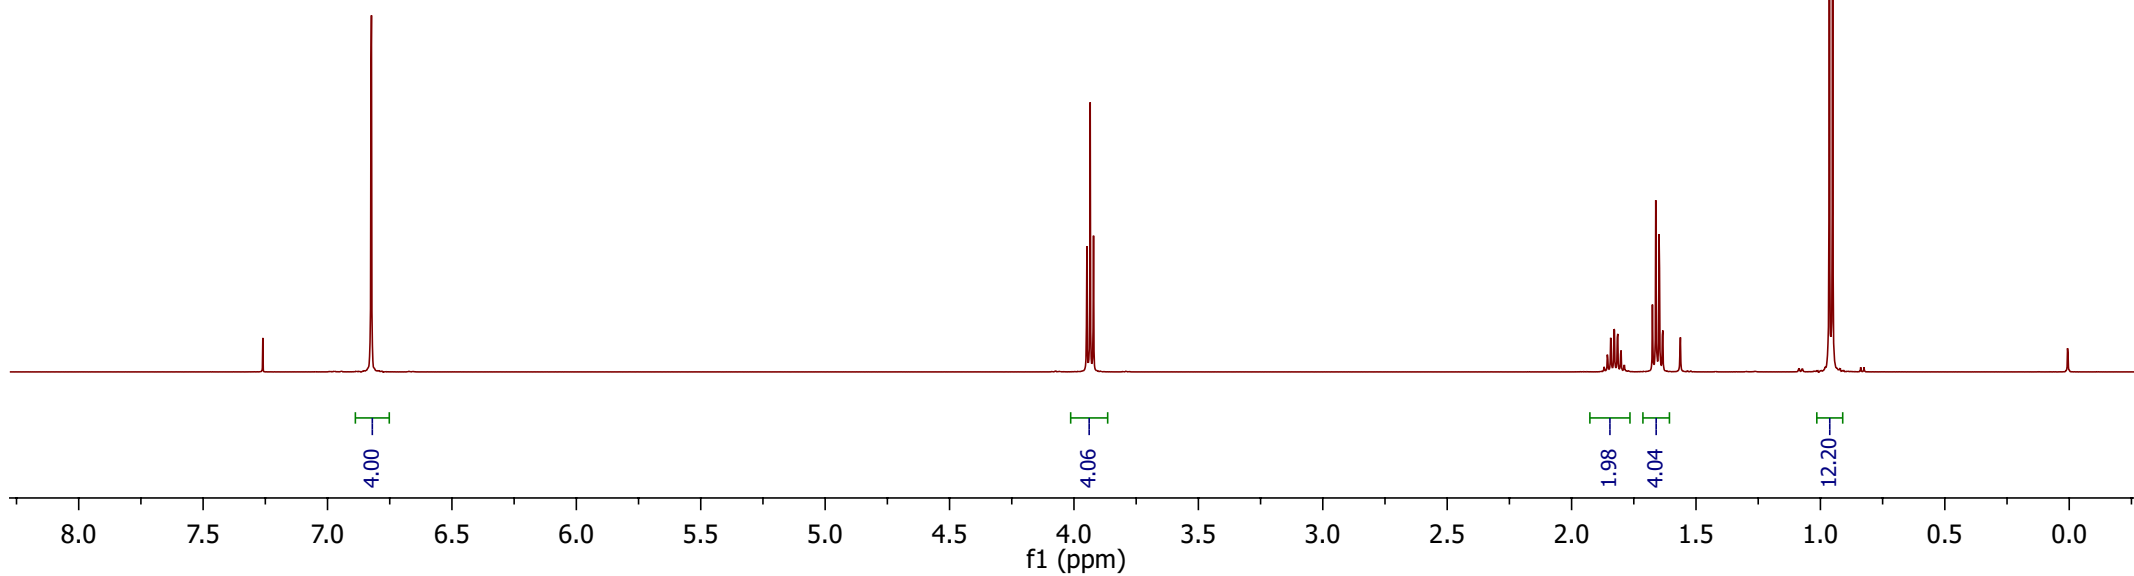

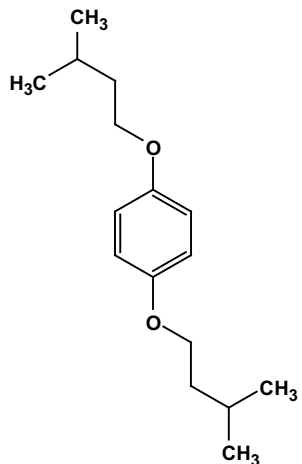

5v

$^{13}\text{C}$  NMR (125 MHz,  $\text{CDCl}_3$ )

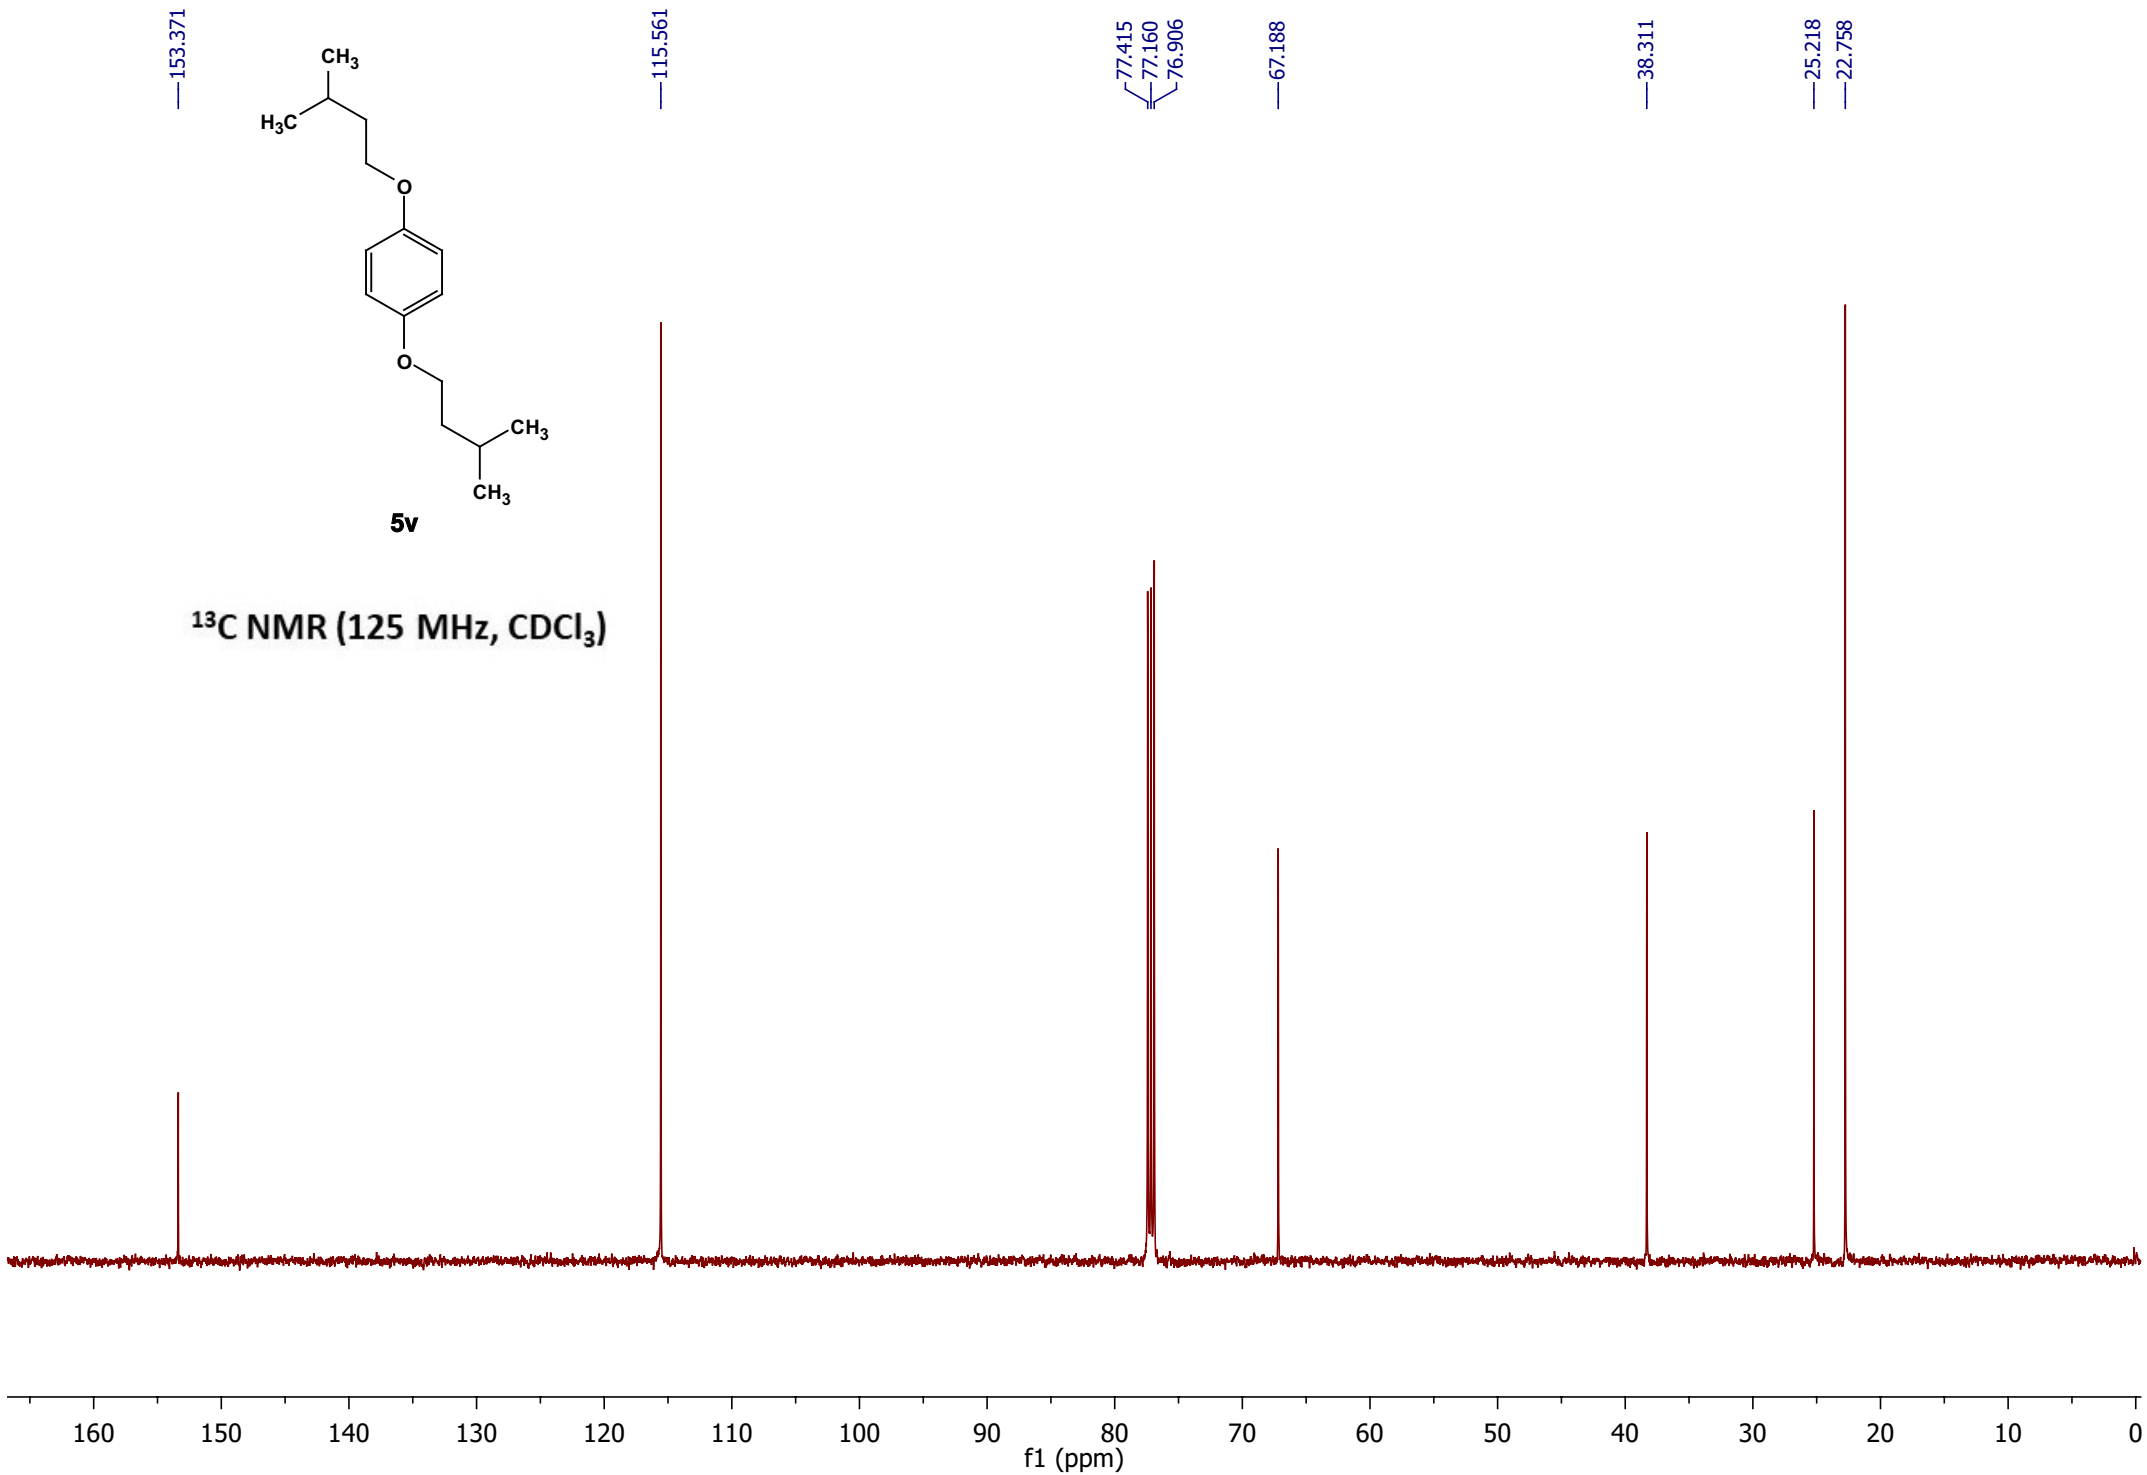

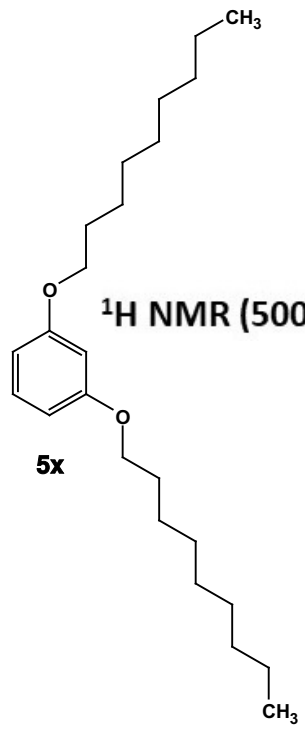

**<sup>1</sup>H NMR (500 MHz, CDCl<sub>3</sub>)**

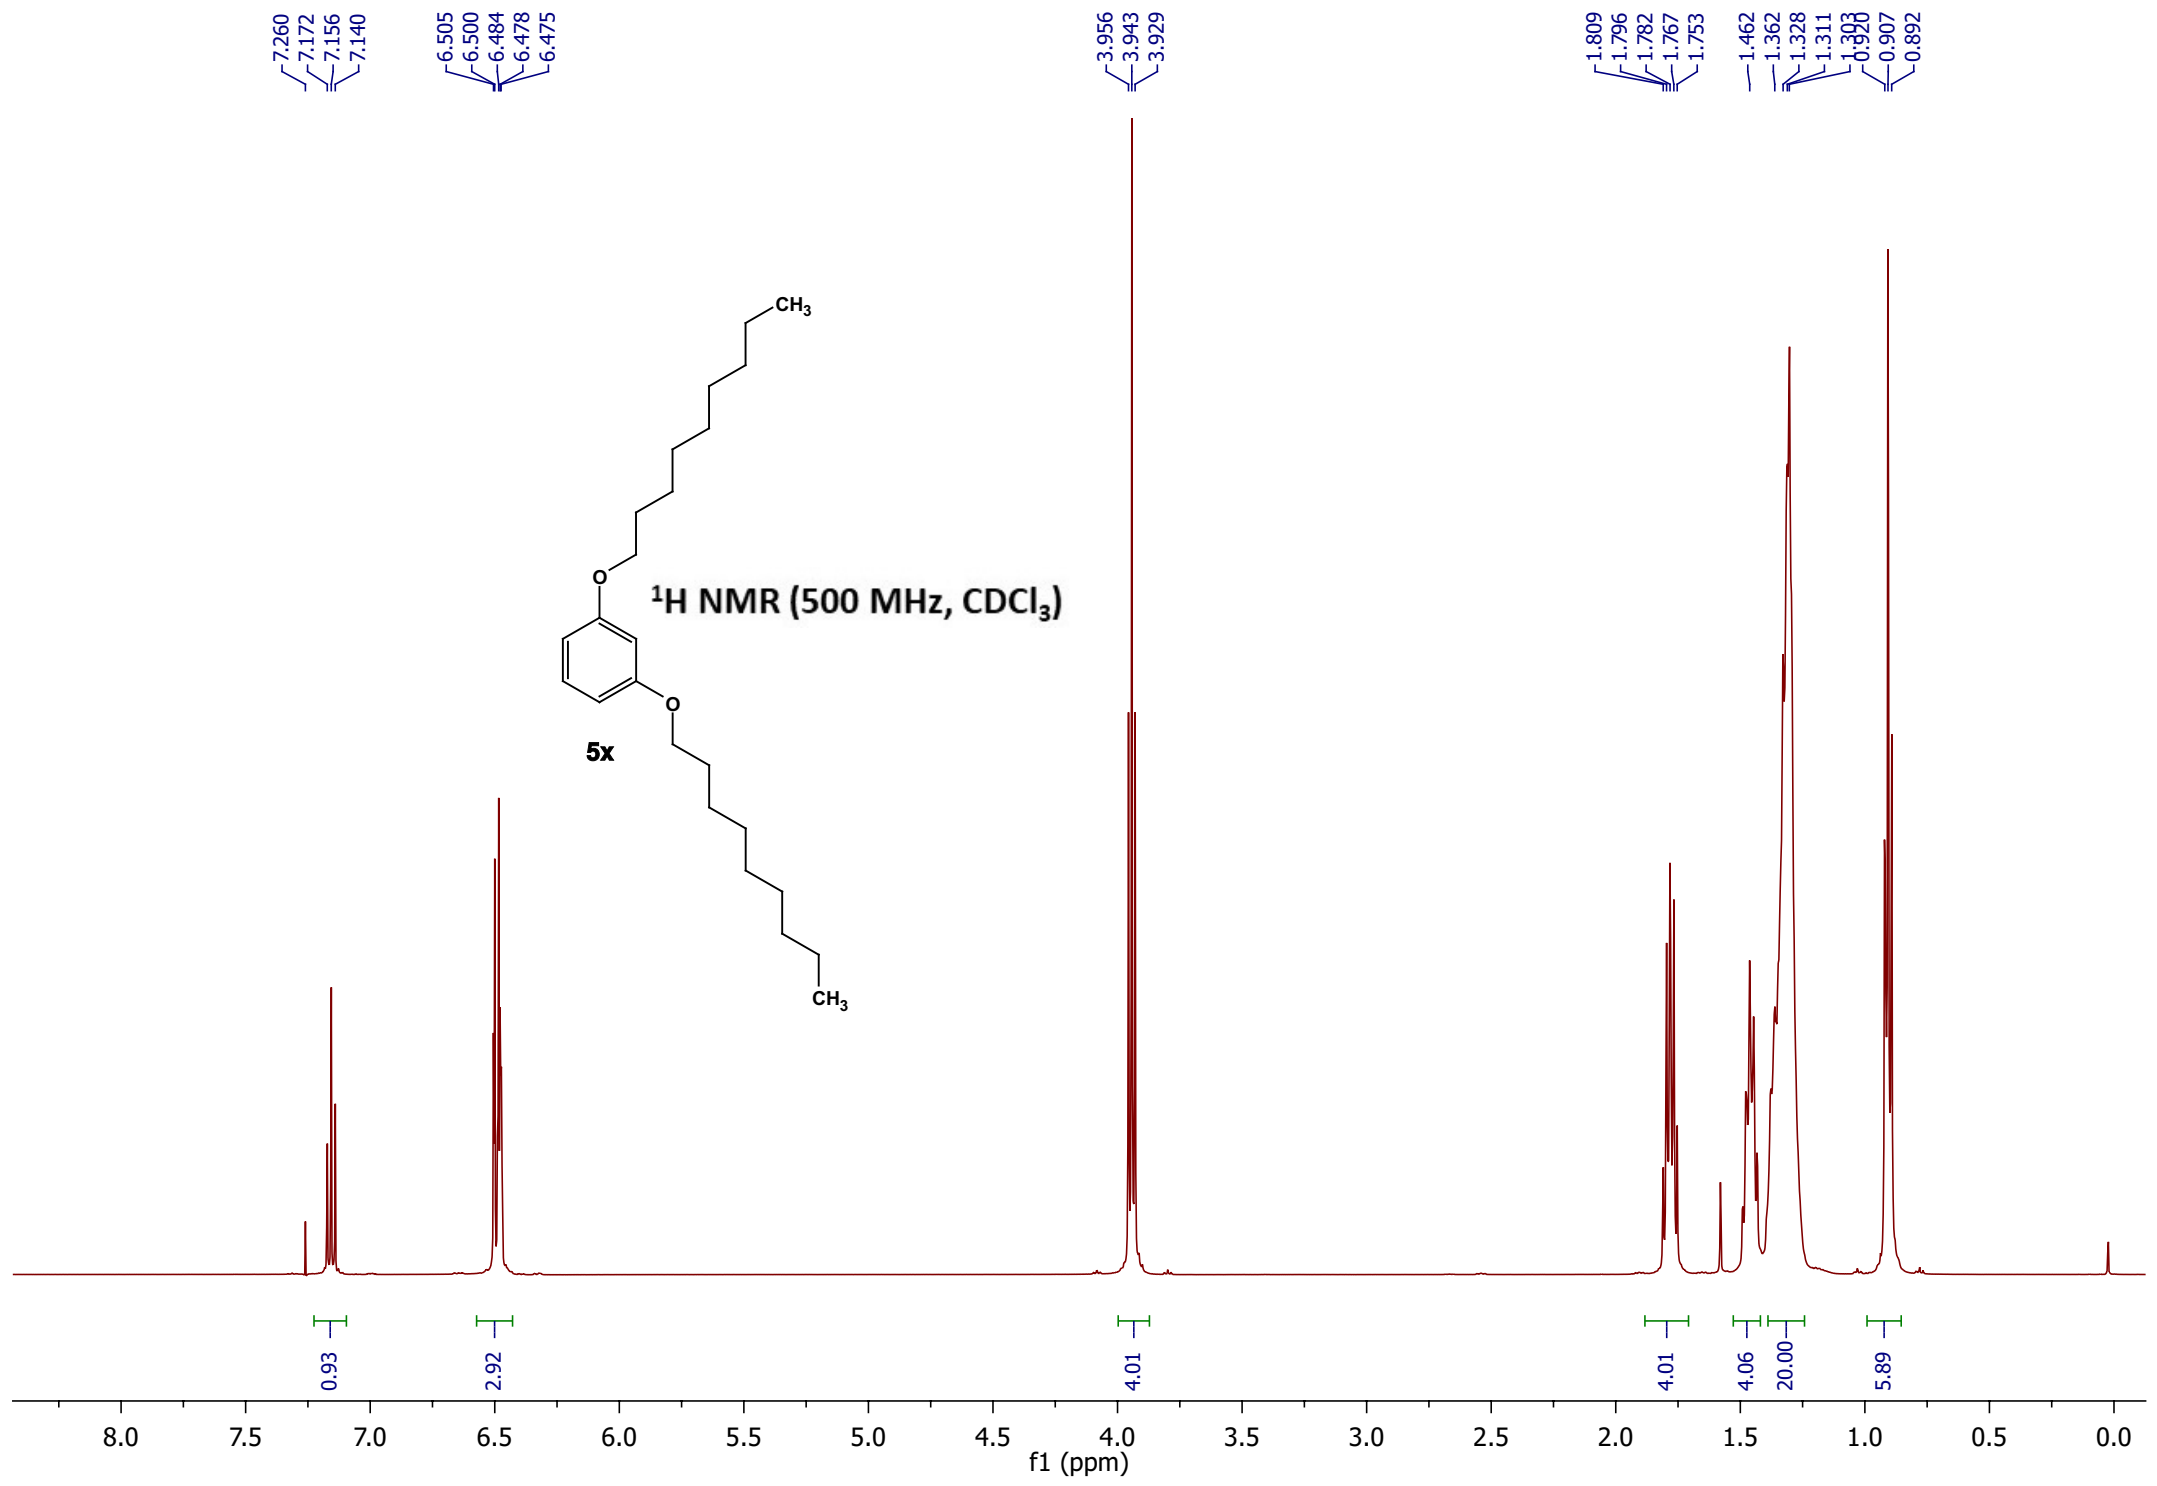

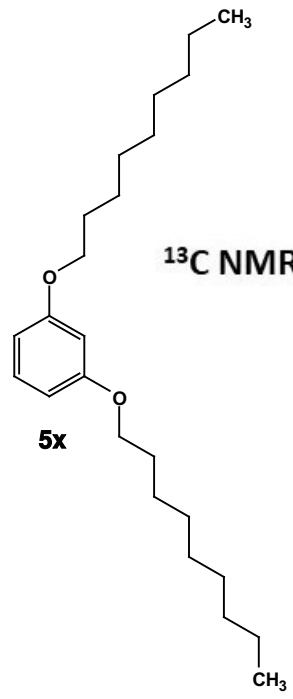

**<sup>13</sup>C NMR (125 MHz, CDCl<sub>3</sub>)**

—160.550

—129.855

—106.788

—101.617

77.413  
77.160  
76.906

—68.118

32.035  
29.694  
29.560  
29.439  
29.418  
26.218  
22.817

—14.235

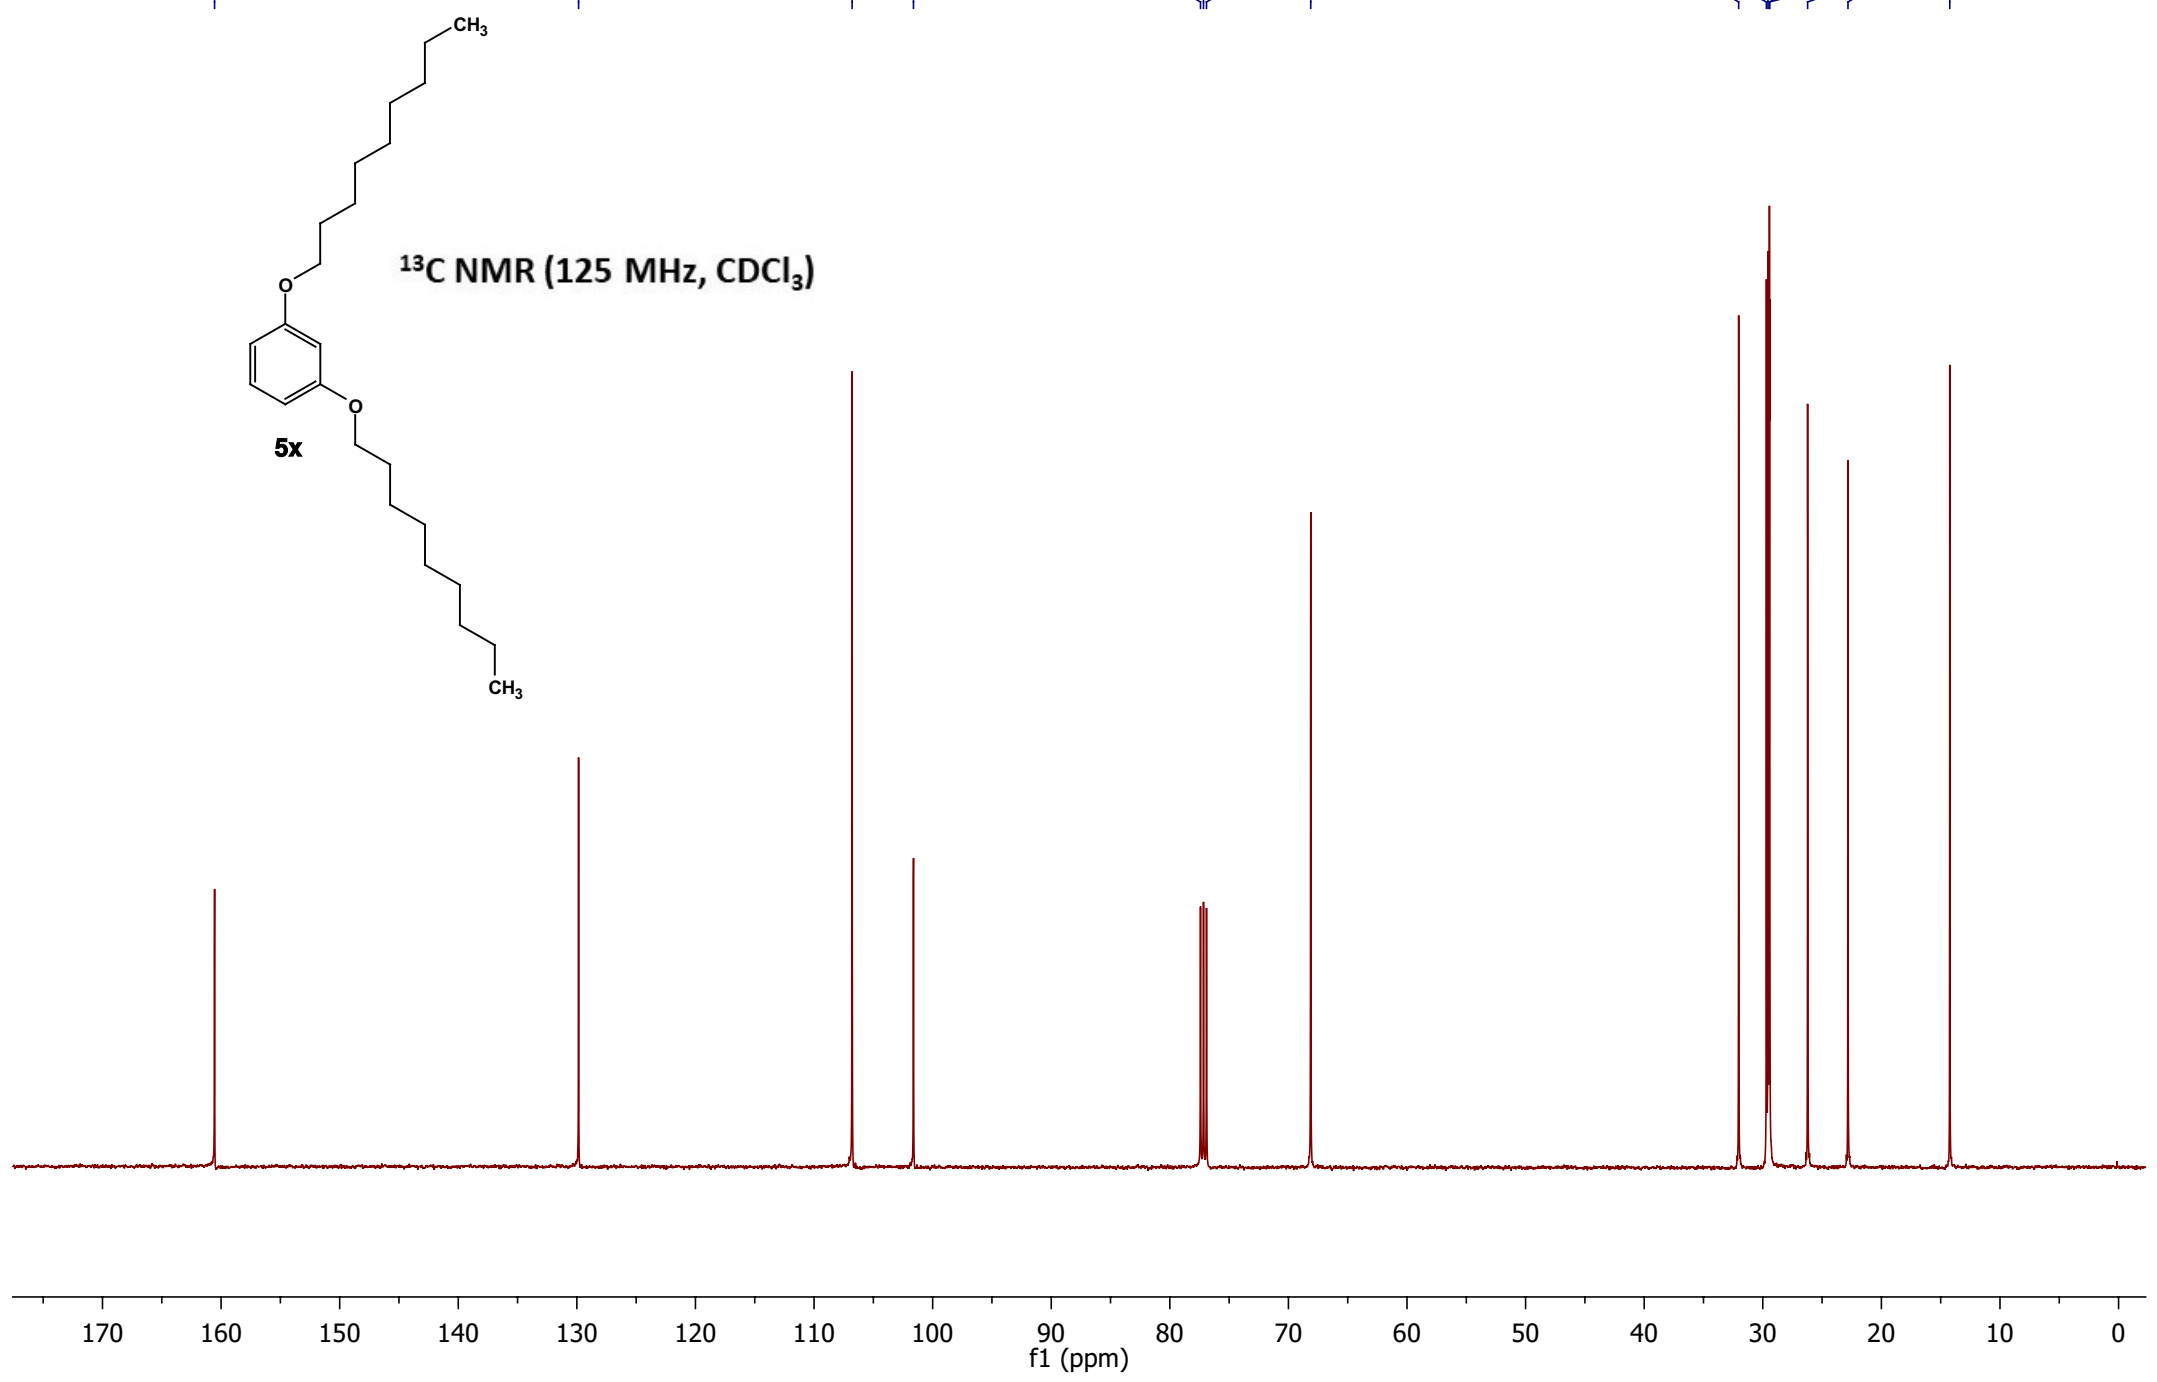

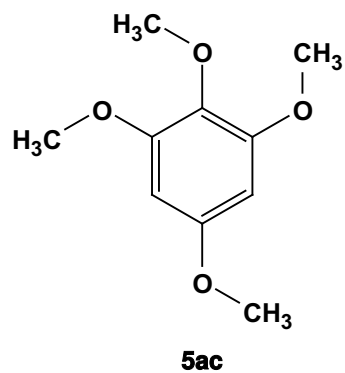

**<sup>1</sup>H NMR (500 MHz, CDCl<sub>3</sub>)**

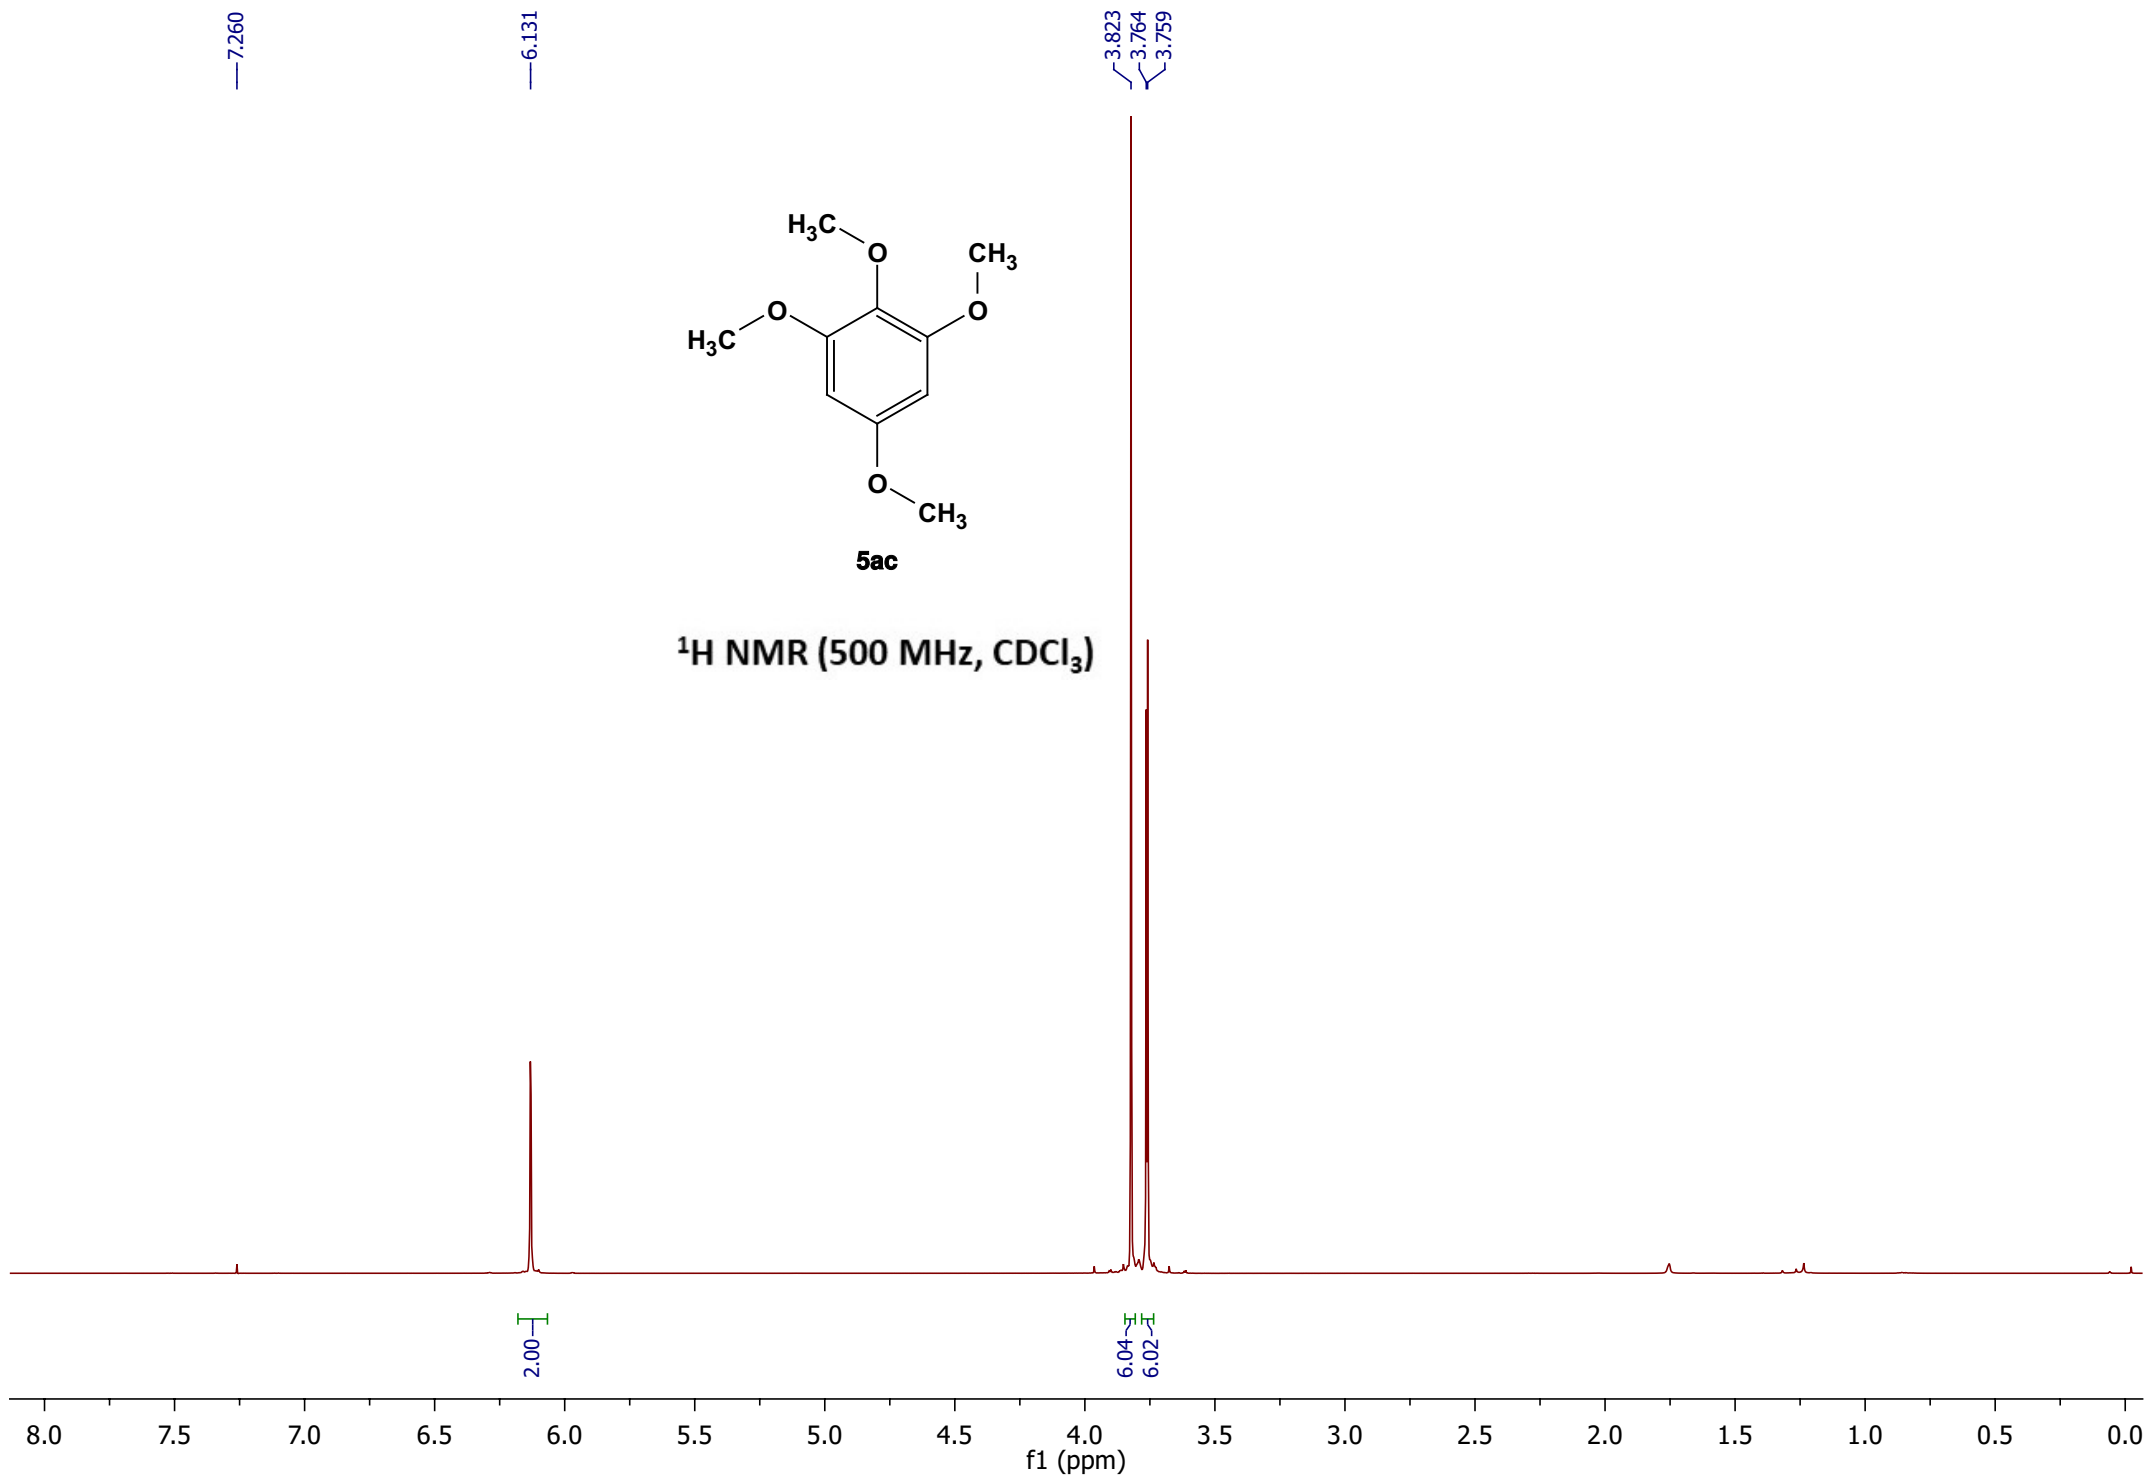

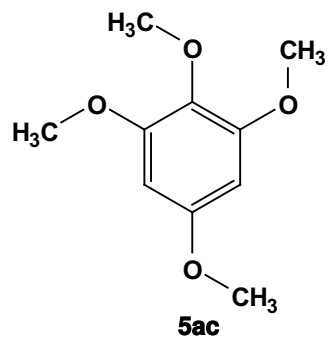

<sup>13</sup>C NMR (125 MHz, CDCl<sub>3</sub>)

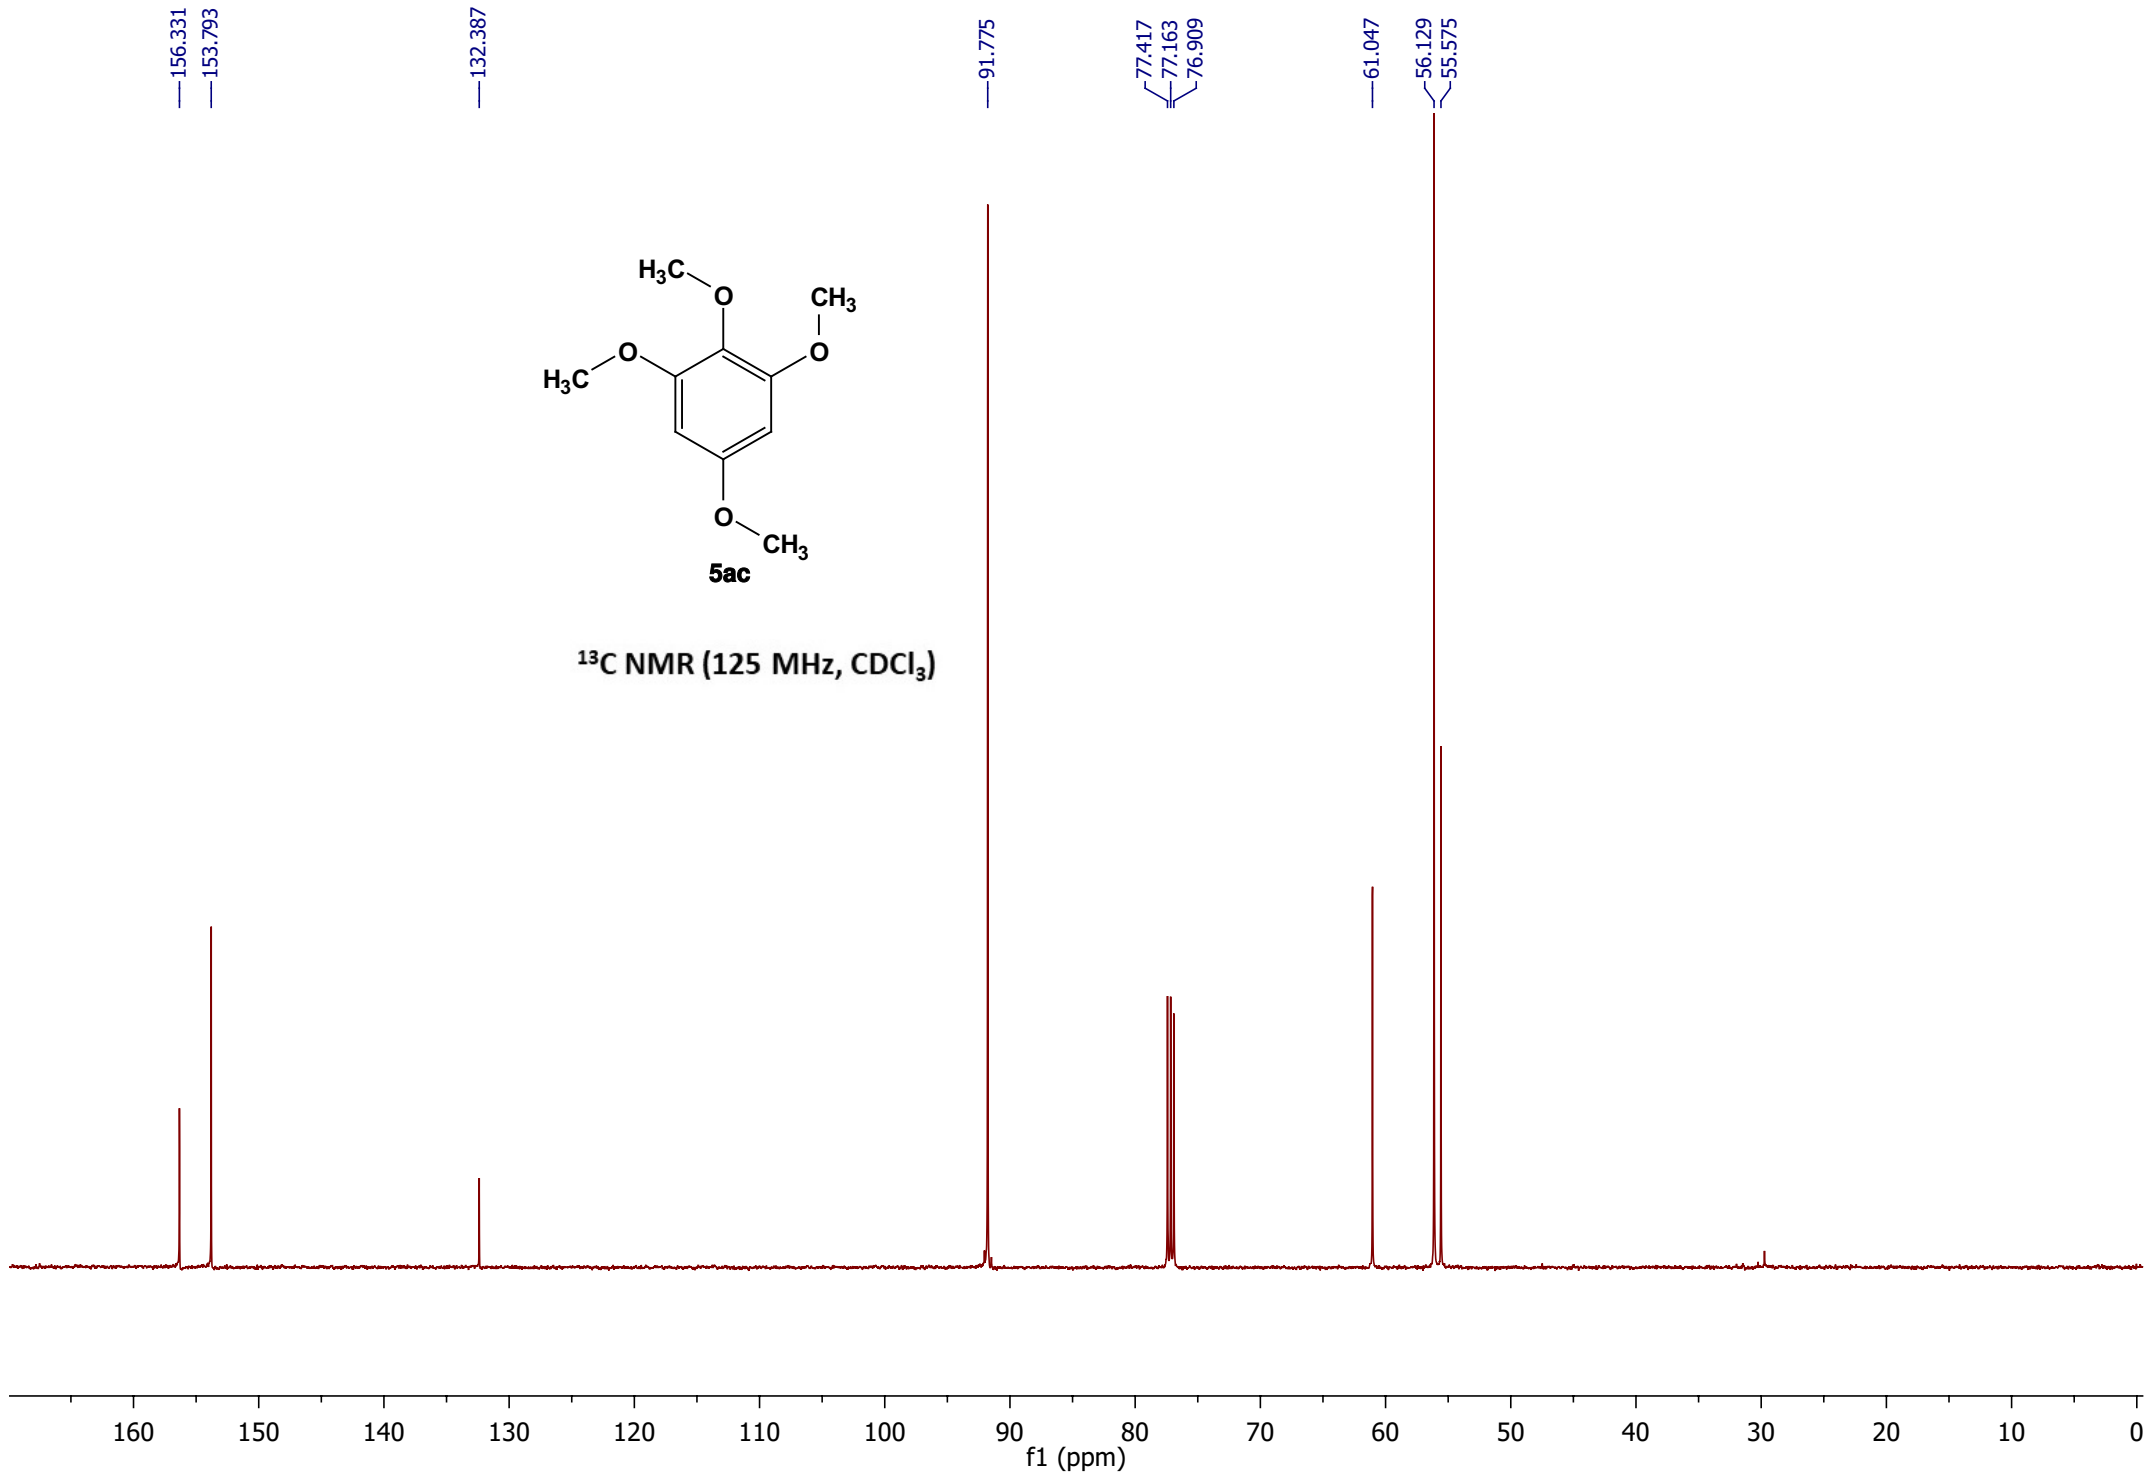

7.260 Chloroform-d

6.856

6.095  
6.084  
6.073  
6.063  
6.049  
6.038  
6.028  
6.017  
5.429  
5.425  
5.421  
5.395  
5.391  
5.290  
5.287  
5.269  
5.266

4.495  
4.492  
4.487  
4.484

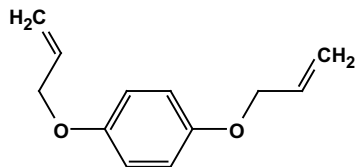

**5ad**

<sup>1</sup>H NMR (500 MHz, CDCl<sub>3</sub>)

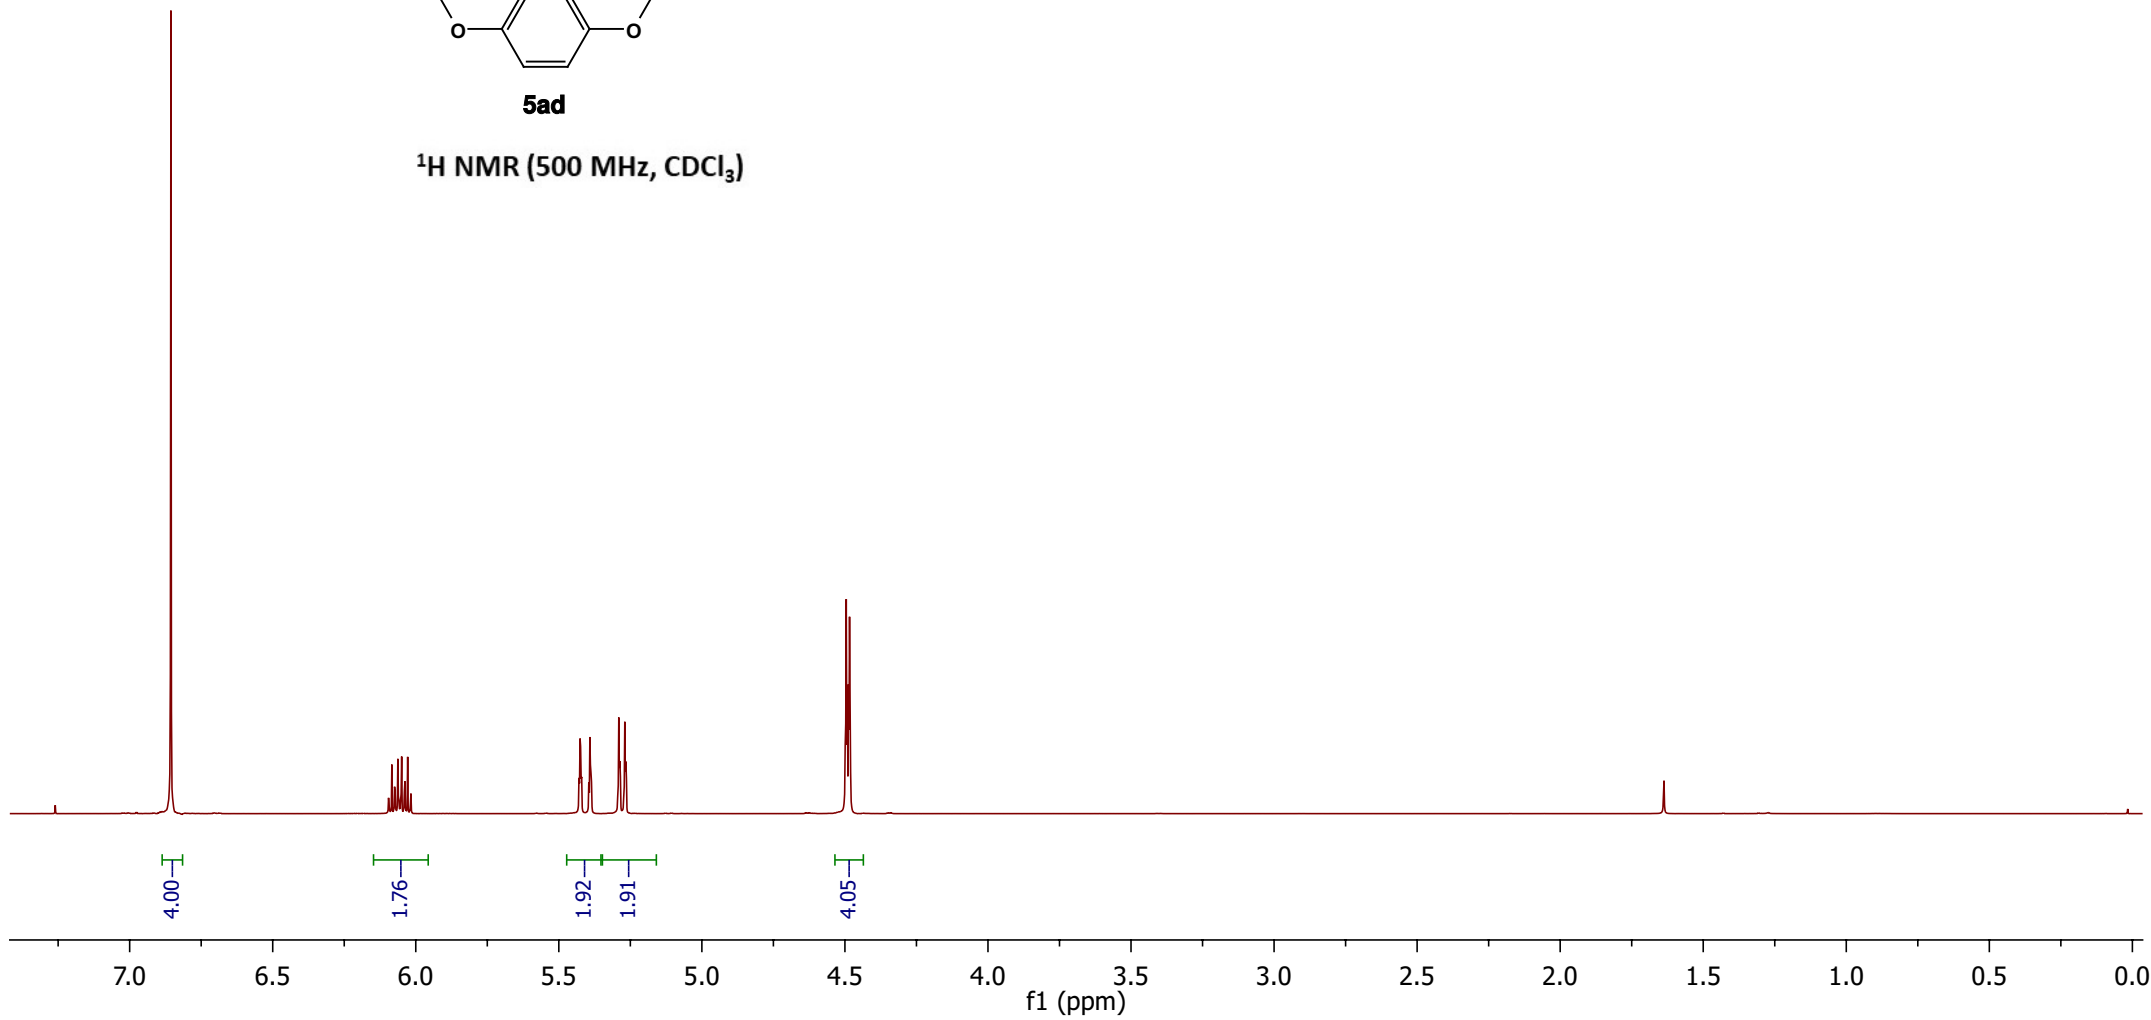

—153.028

—133.737

—117.534

—115.781

—77.415

—77.160

—76.906

—69.576

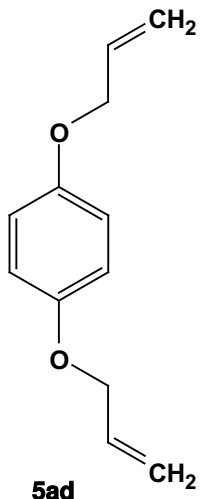

<sup>13</sup>C NMR (125 MHz, CDCl<sub>3</sub>)

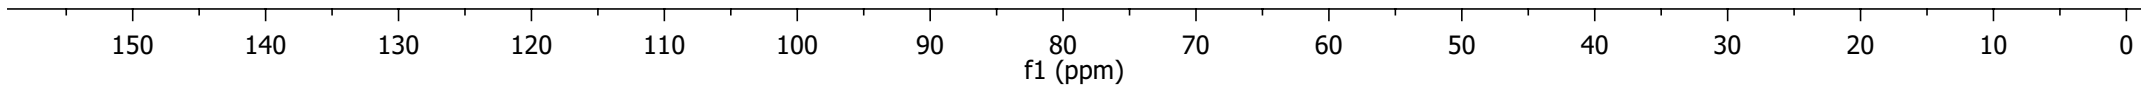



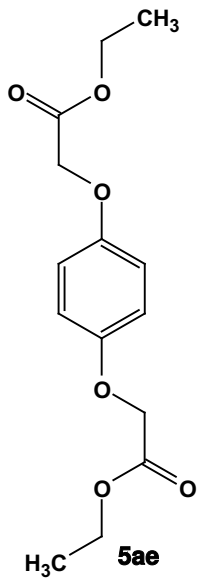

<sup>1</sup>H NMR (500 MHz, CDCl<sub>3</sub>)

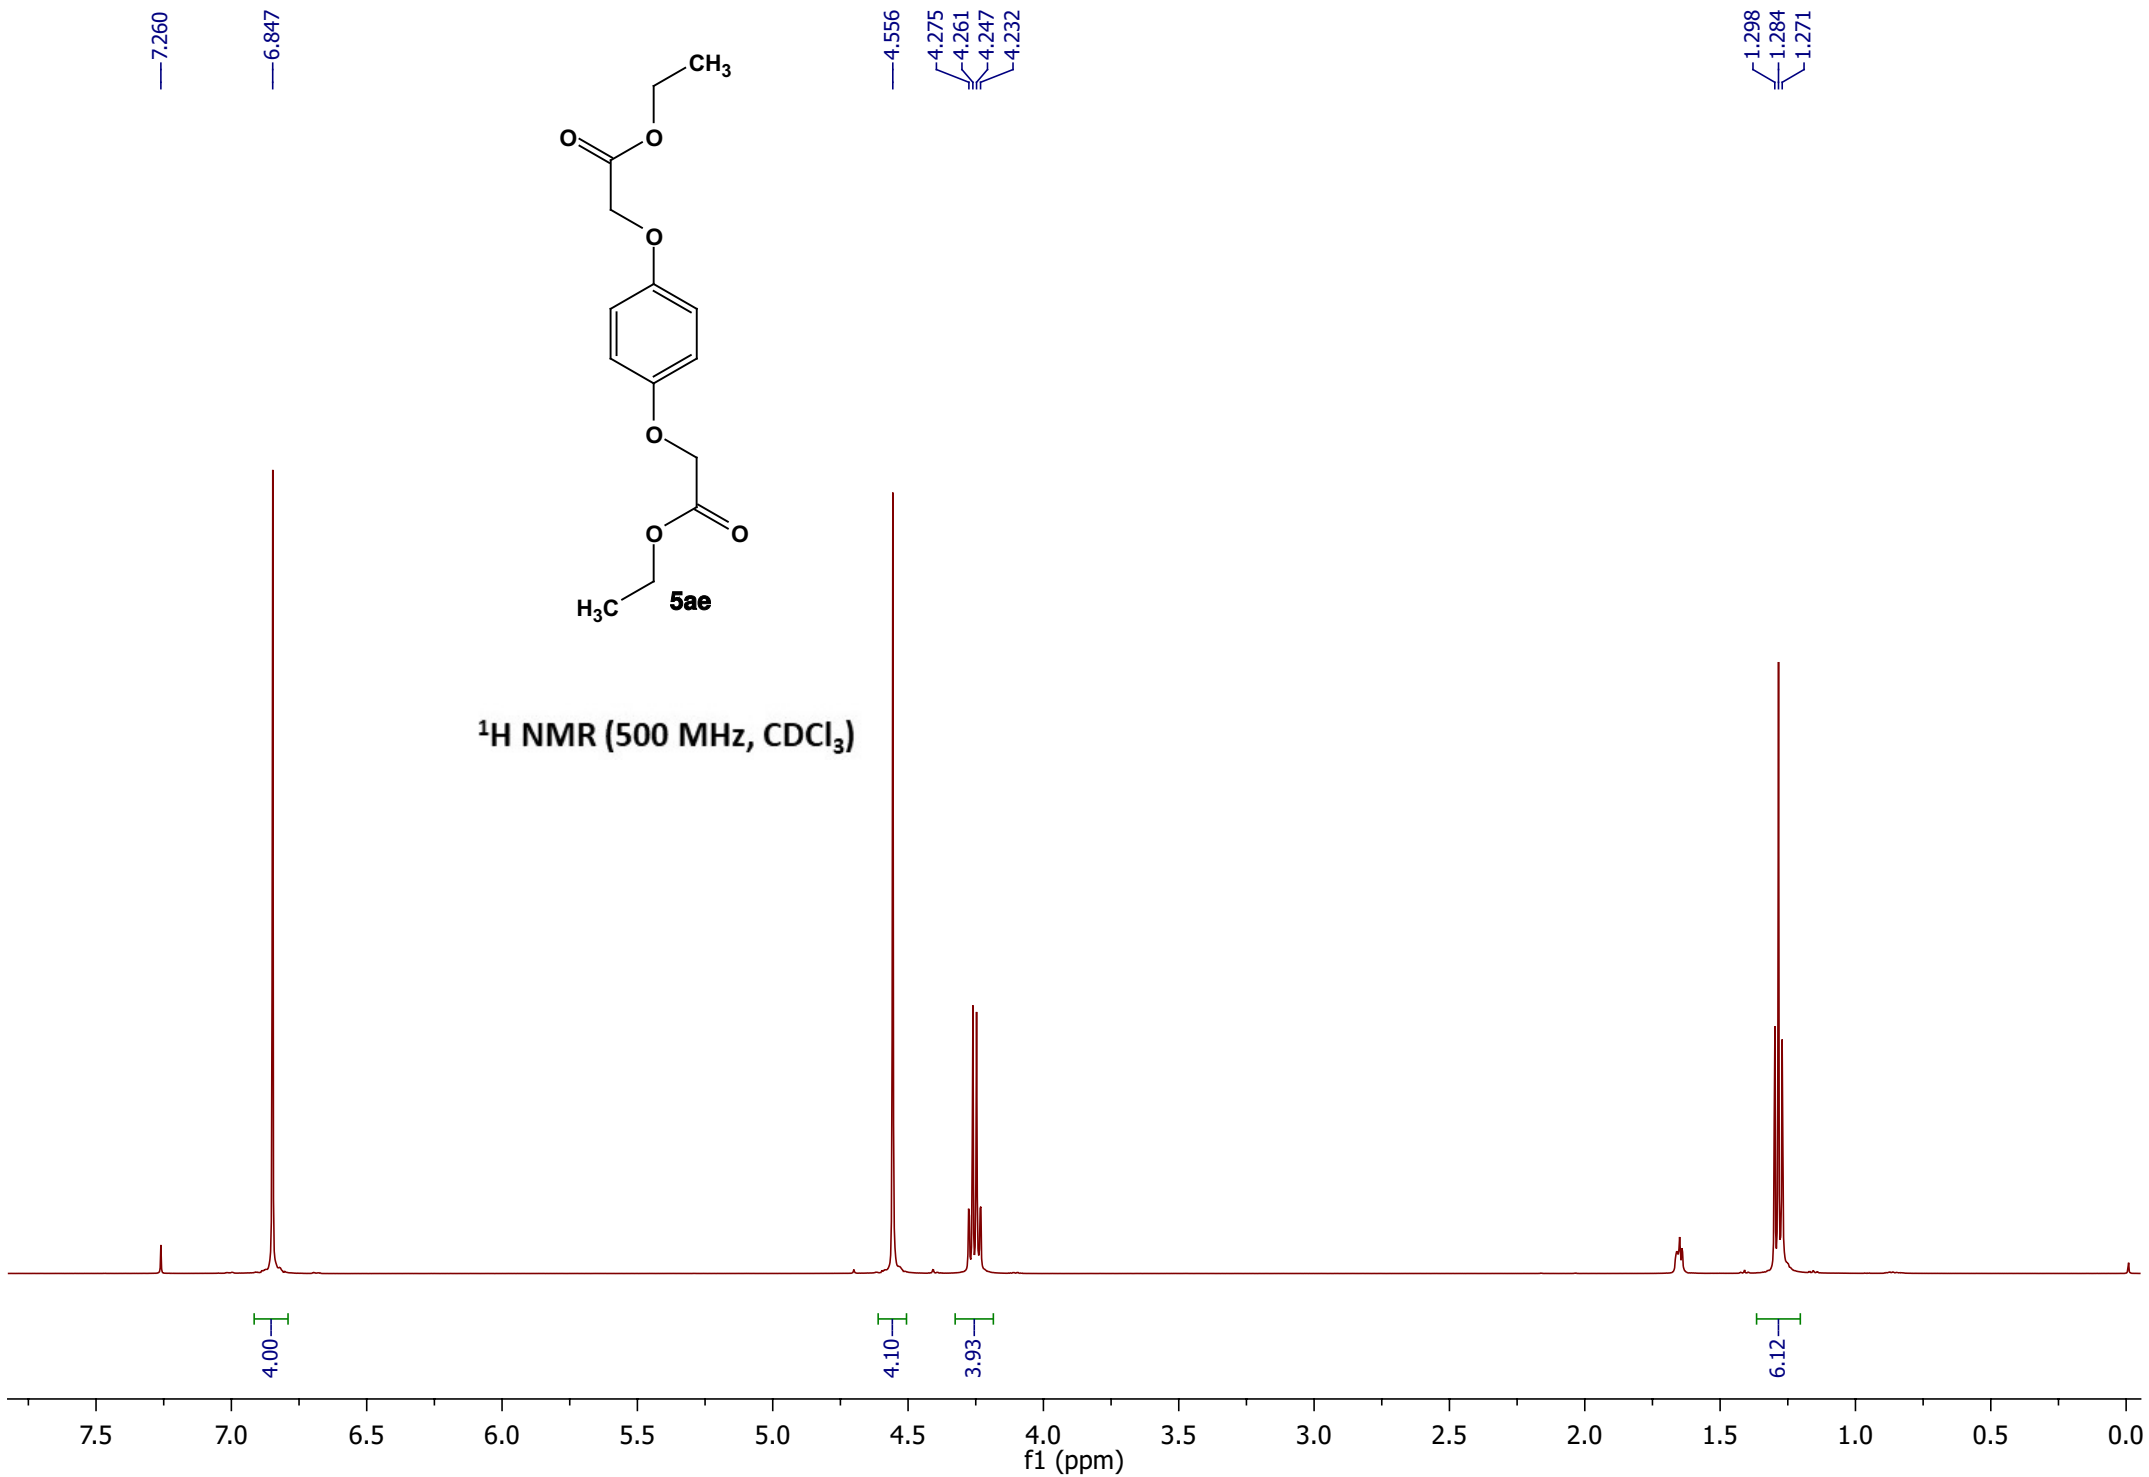

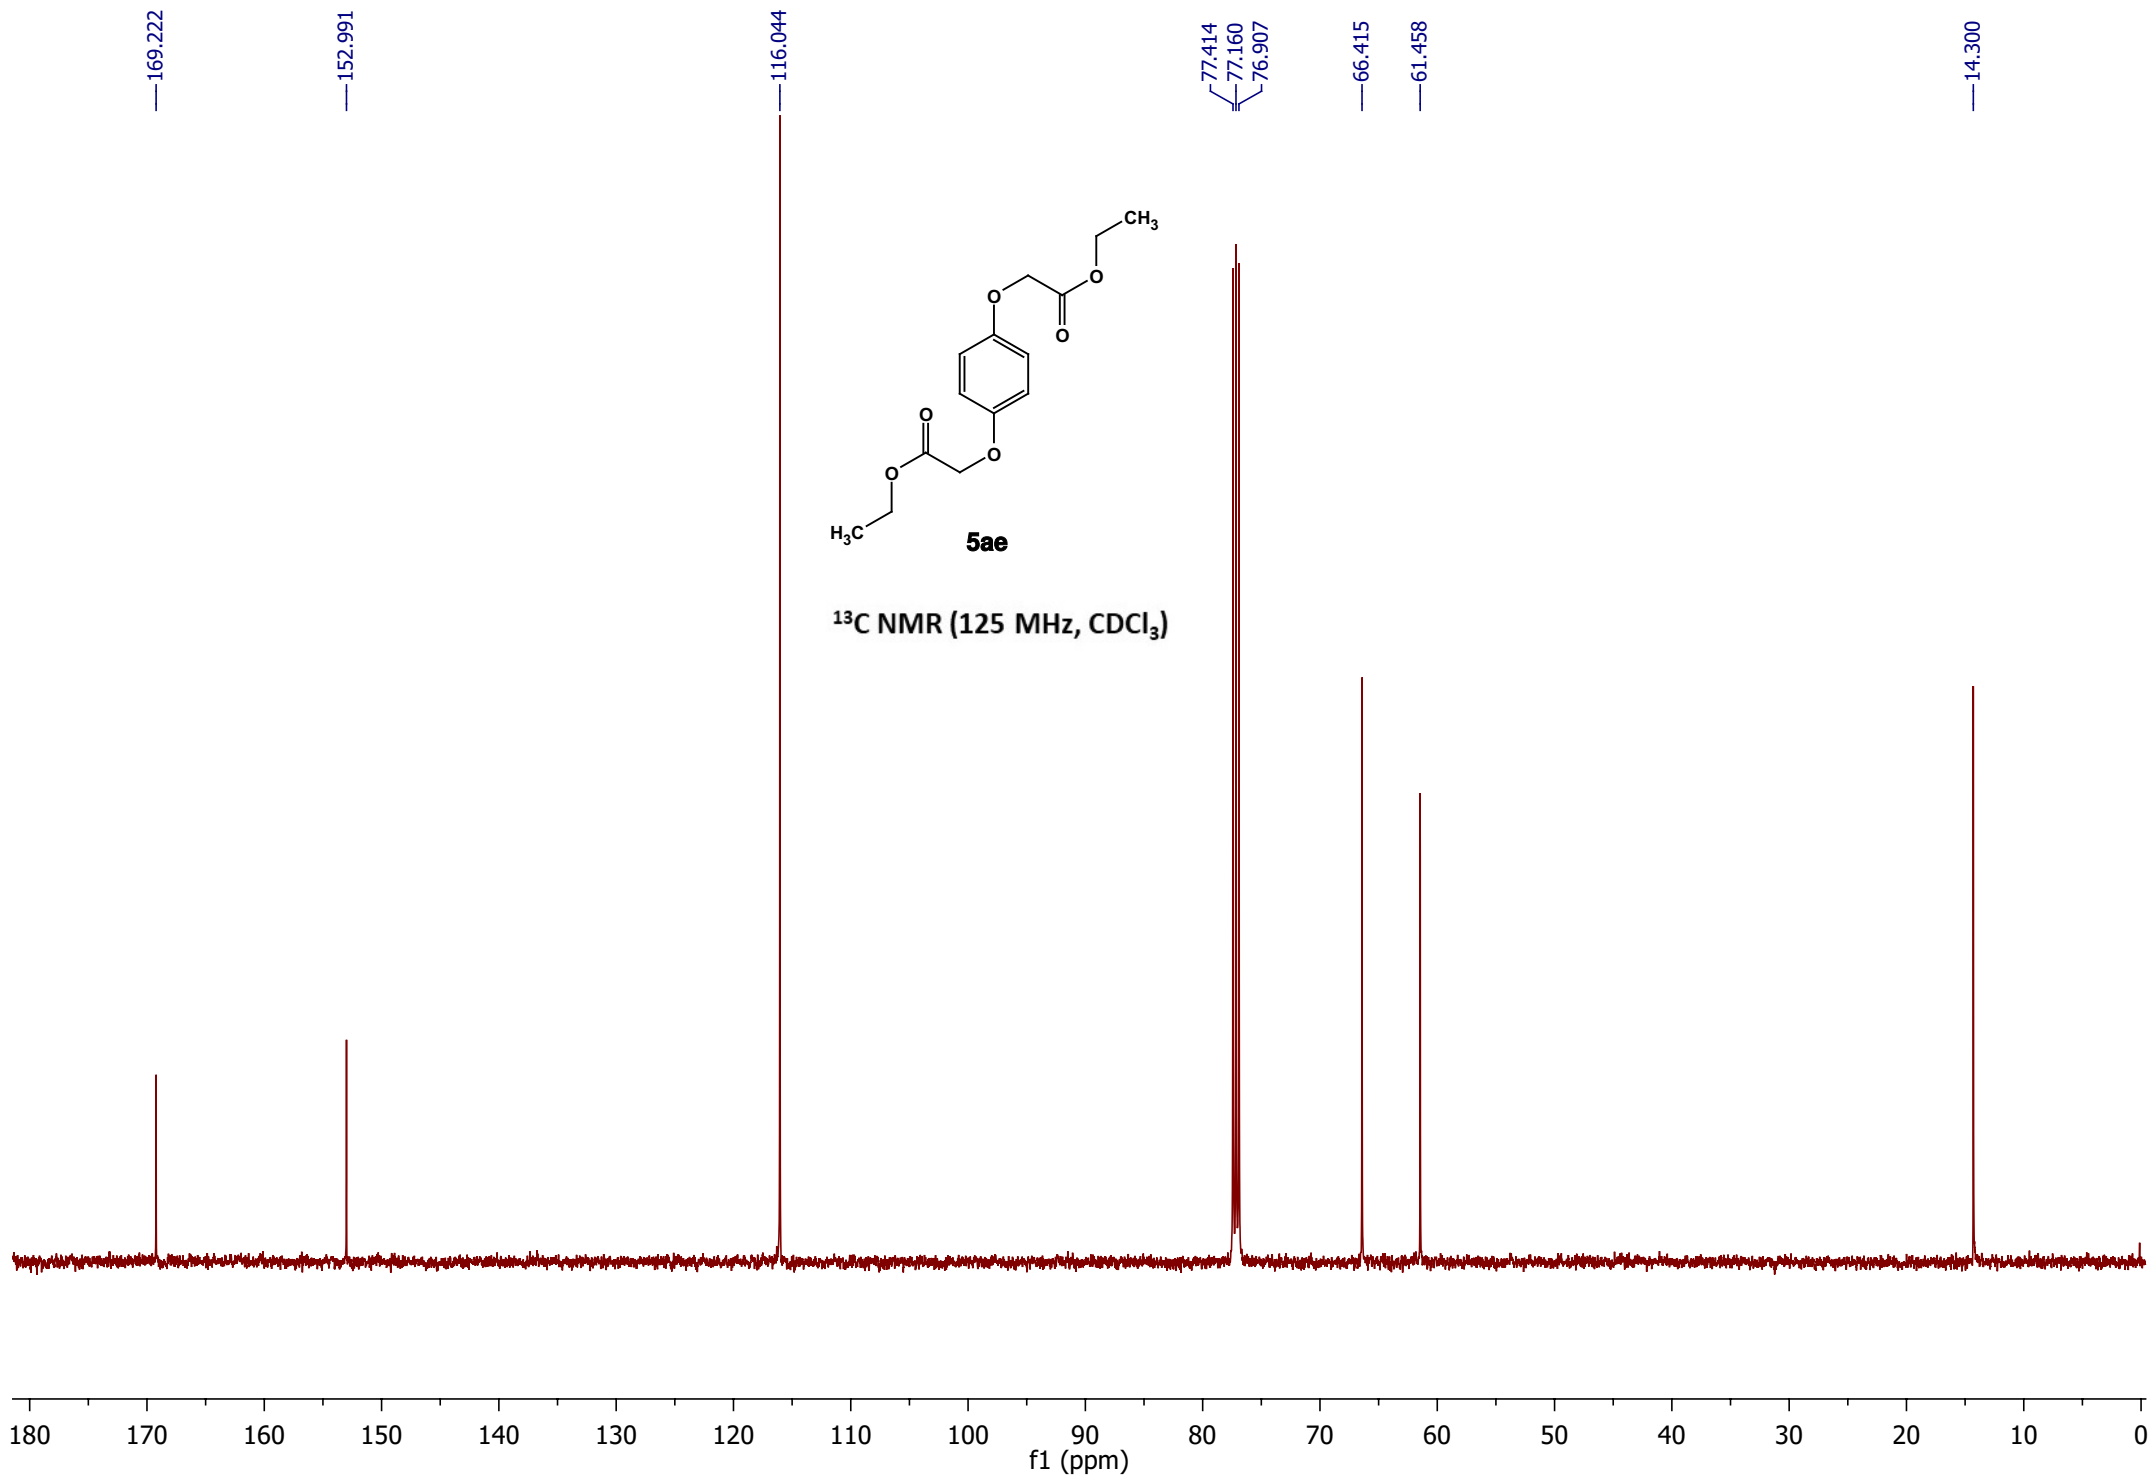

7.260 Chloroform-d  
7.260  
7.216  
7.199

6.731  
6.717  
6.713  
6.651

3.782

2.922  
2.910  
2.905  
2.896  
2.891

2.532  
2.515  
2.494  
2.477  
2.387  
2.254  
2.163  
2.144  
2.124  
2.107  
2.059  
2.048  
2.029  
2.003  
1.998  
1.993  
1.968  
1.945

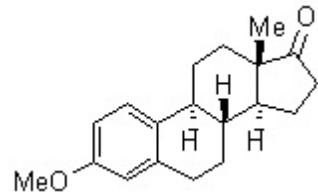

**5ak**

<sup>1</sup>H NMR (500 MHz, CDCl<sub>3</sub>)

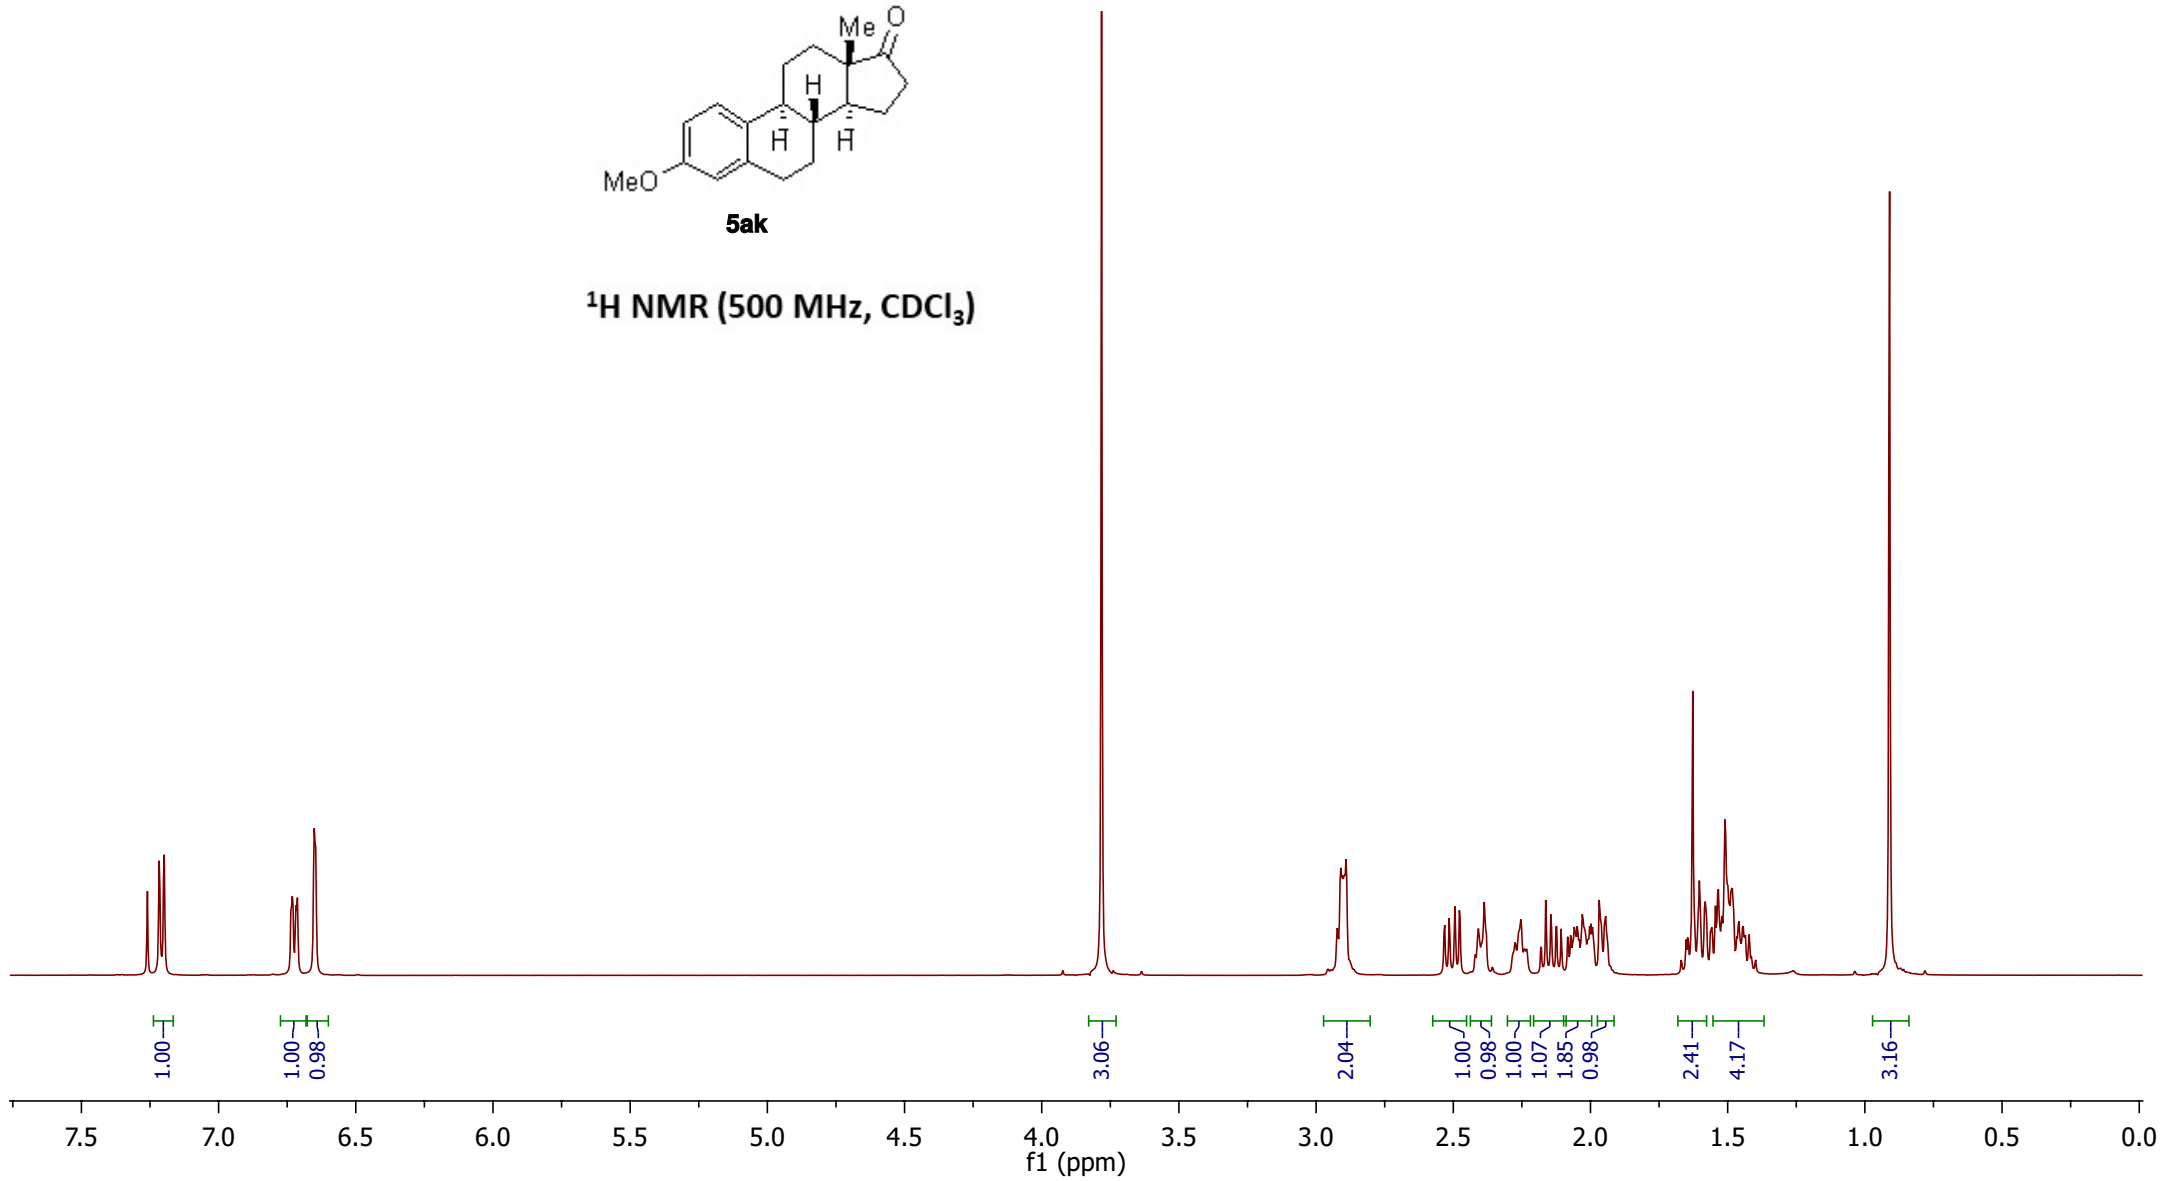

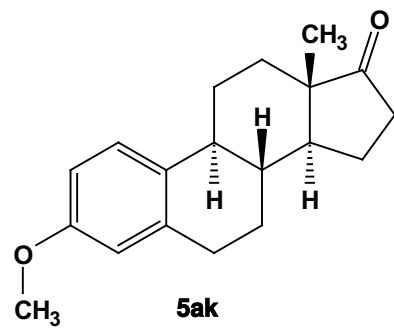

<sup>13</sup>C NMR (125 MHz, CDCl<sub>3</sub>)

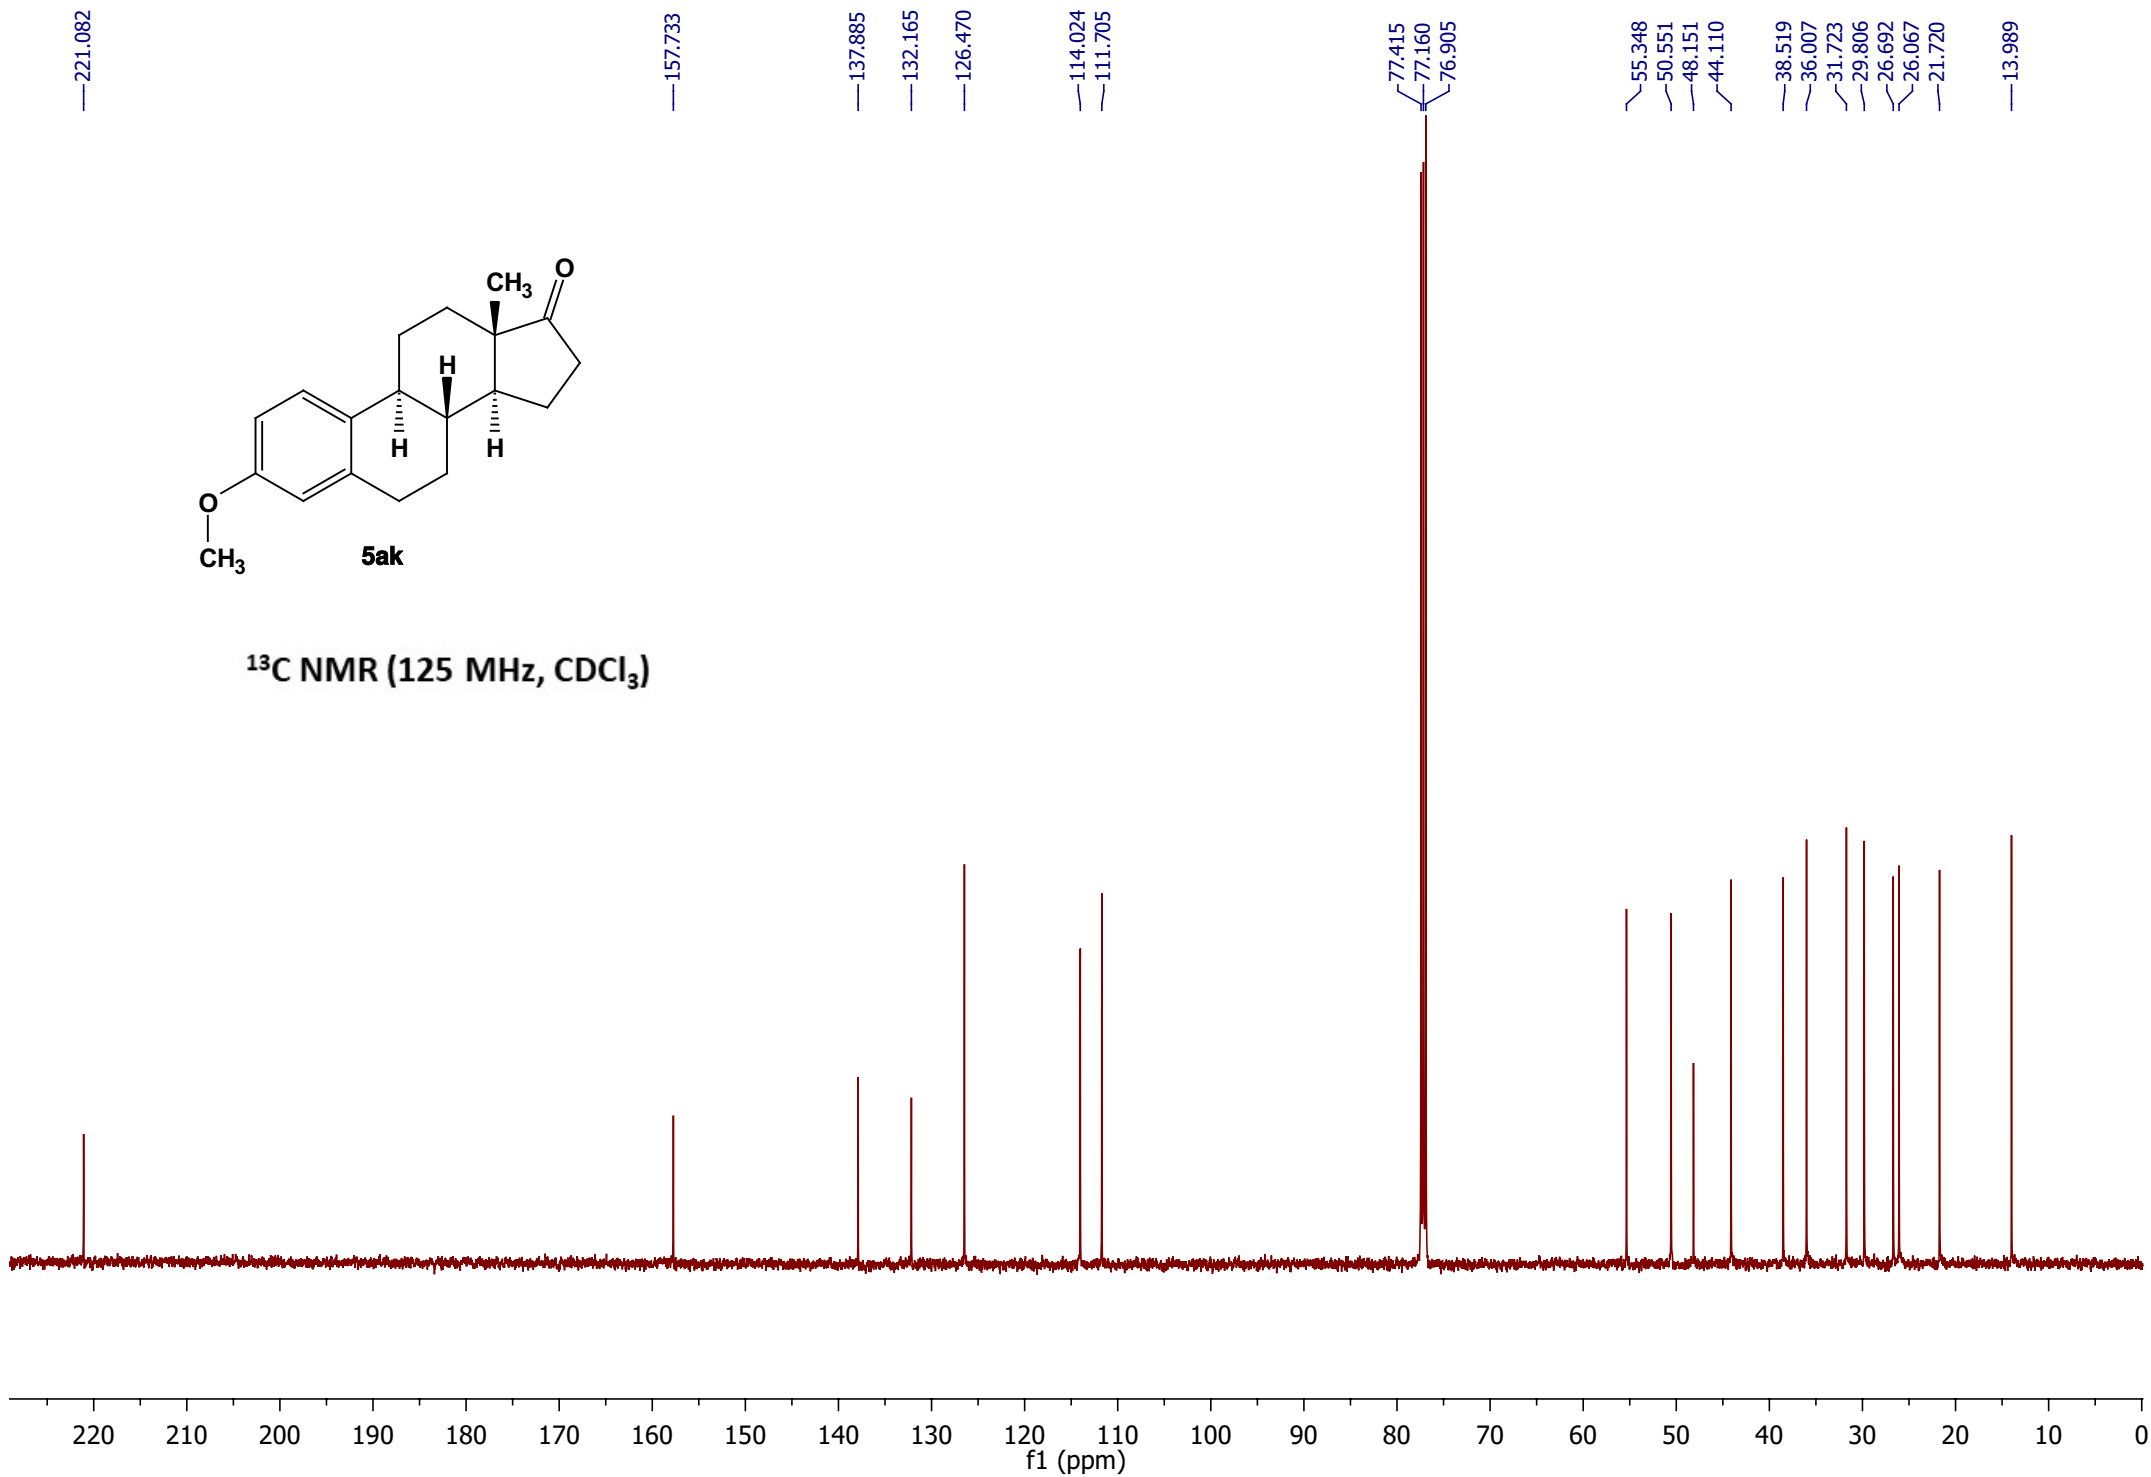

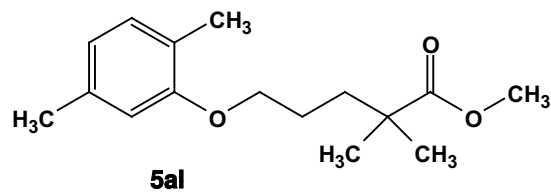

<sup>1</sup>H NMR (500 MHz, CDCl<sub>3</sub>)

7.260  
7.028  
7.012  
6.682  
6.667  
6.625

3.942  
3.932  
3.922  
3.684

2.326  
2.199  
1.780  
1.775  
1.764  
1.745  
1.741  
1.727  
1.721  
1.713  
1.687  
1.244

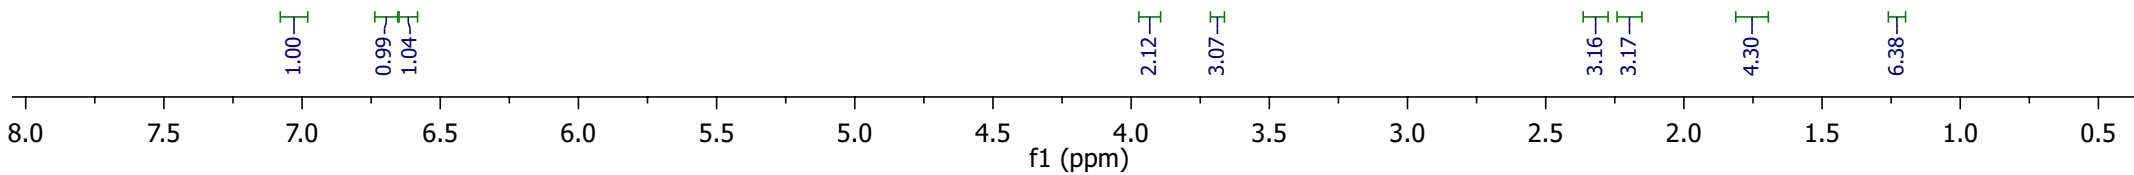

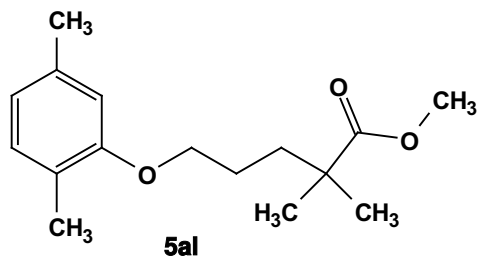

<sup>13</sup>C NMR (125 MHz, CDCl<sub>3</sub>)

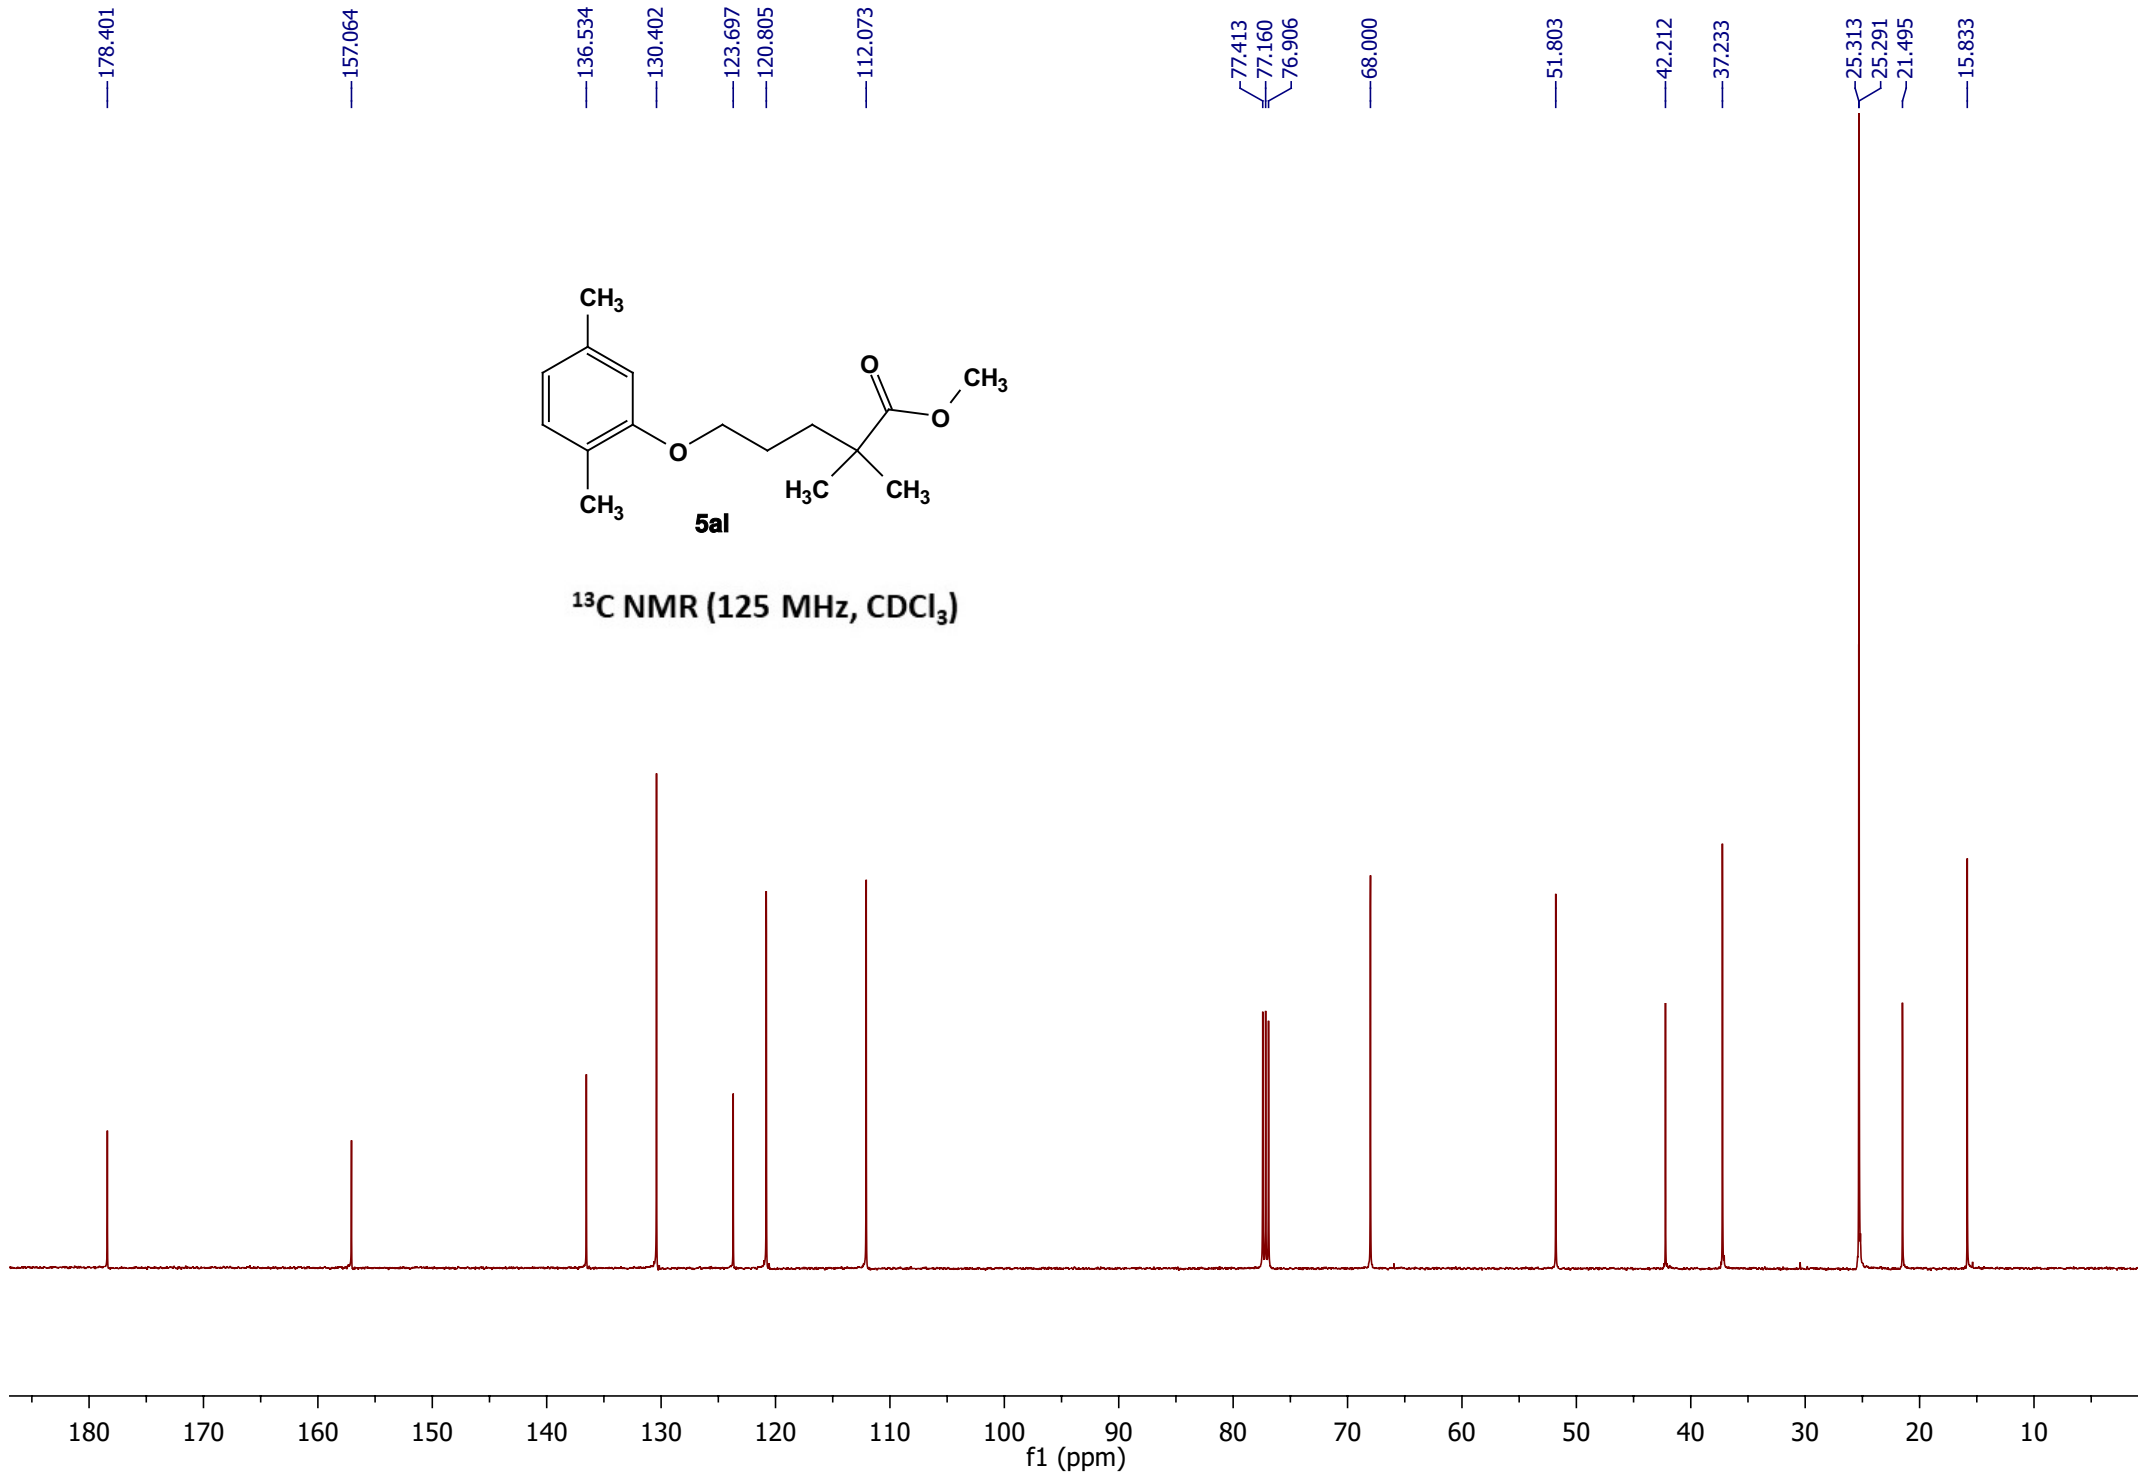

7.919  
7.913  
7.909  
7.903  
7.748  
7.742  
7.738  
7.732  
7.260

6.214

3.837  
3.748

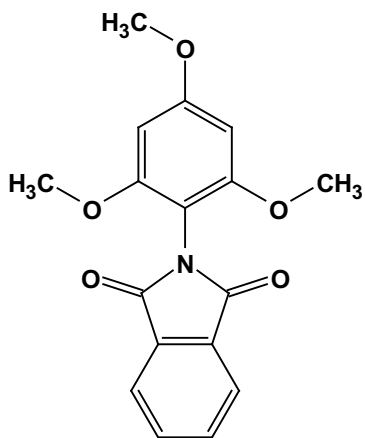

**7a**

<sup>1</sup>H NMR (500 MHz, CDCl<sub>3</sub>)

1.94  
2.05

2.00

3.12  
6.22

9.0 8.5 8.0 7.5 7.0 6.5 6.0 5.5 5.0 4.5 4.0 3.5 3.0 2.5 2.0 1.5 1.0 0.5 0.0

f1 (ppm)

—167.837

—162.224

—157.759

—133.951  
—132.674

—123.590

—101.810

—91.184

—77.414  
—77.160  
—76.907

—56.114  
—55.647

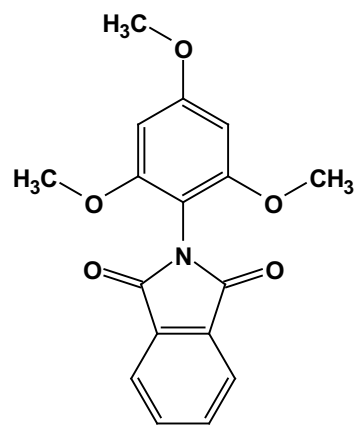

**7a**

<sup>13</sup>C NMR (125 MHz, CDCl<sub>3</sub>)

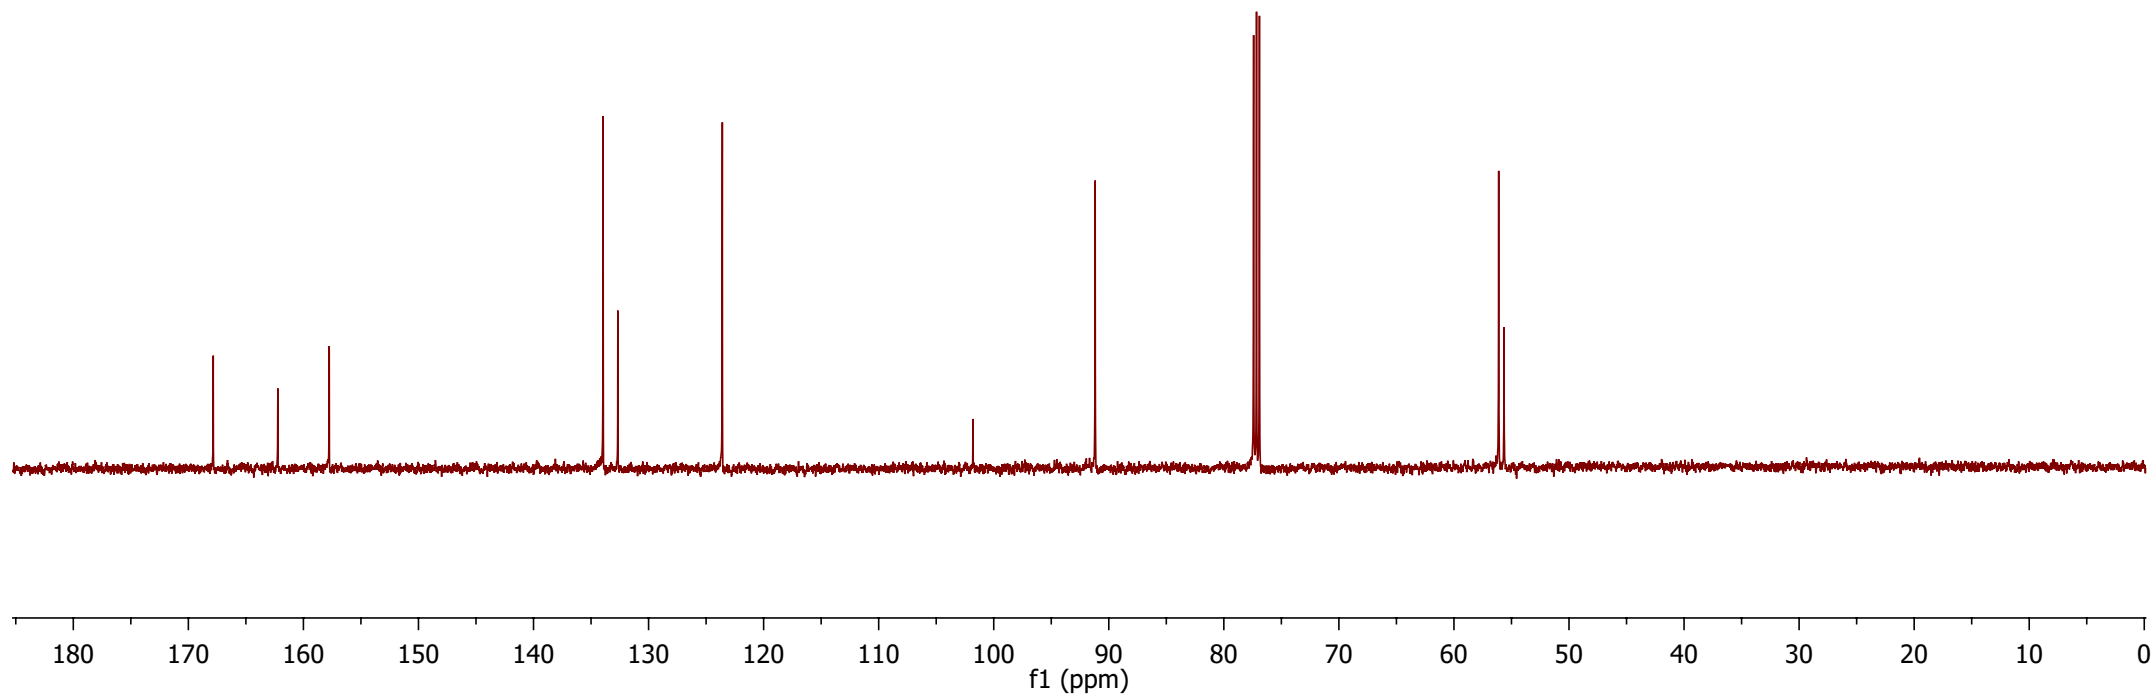



7.797  
7.782  
7.716  
7.537  
7.521  
7.260

6.207

3.834  
3.743

2.520

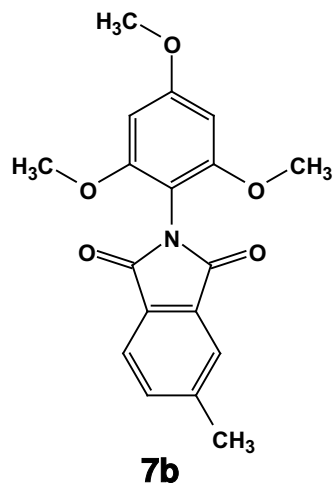

<sup>1</sup>H NMR (500 MHz, CDCl<sub>3</sub>)

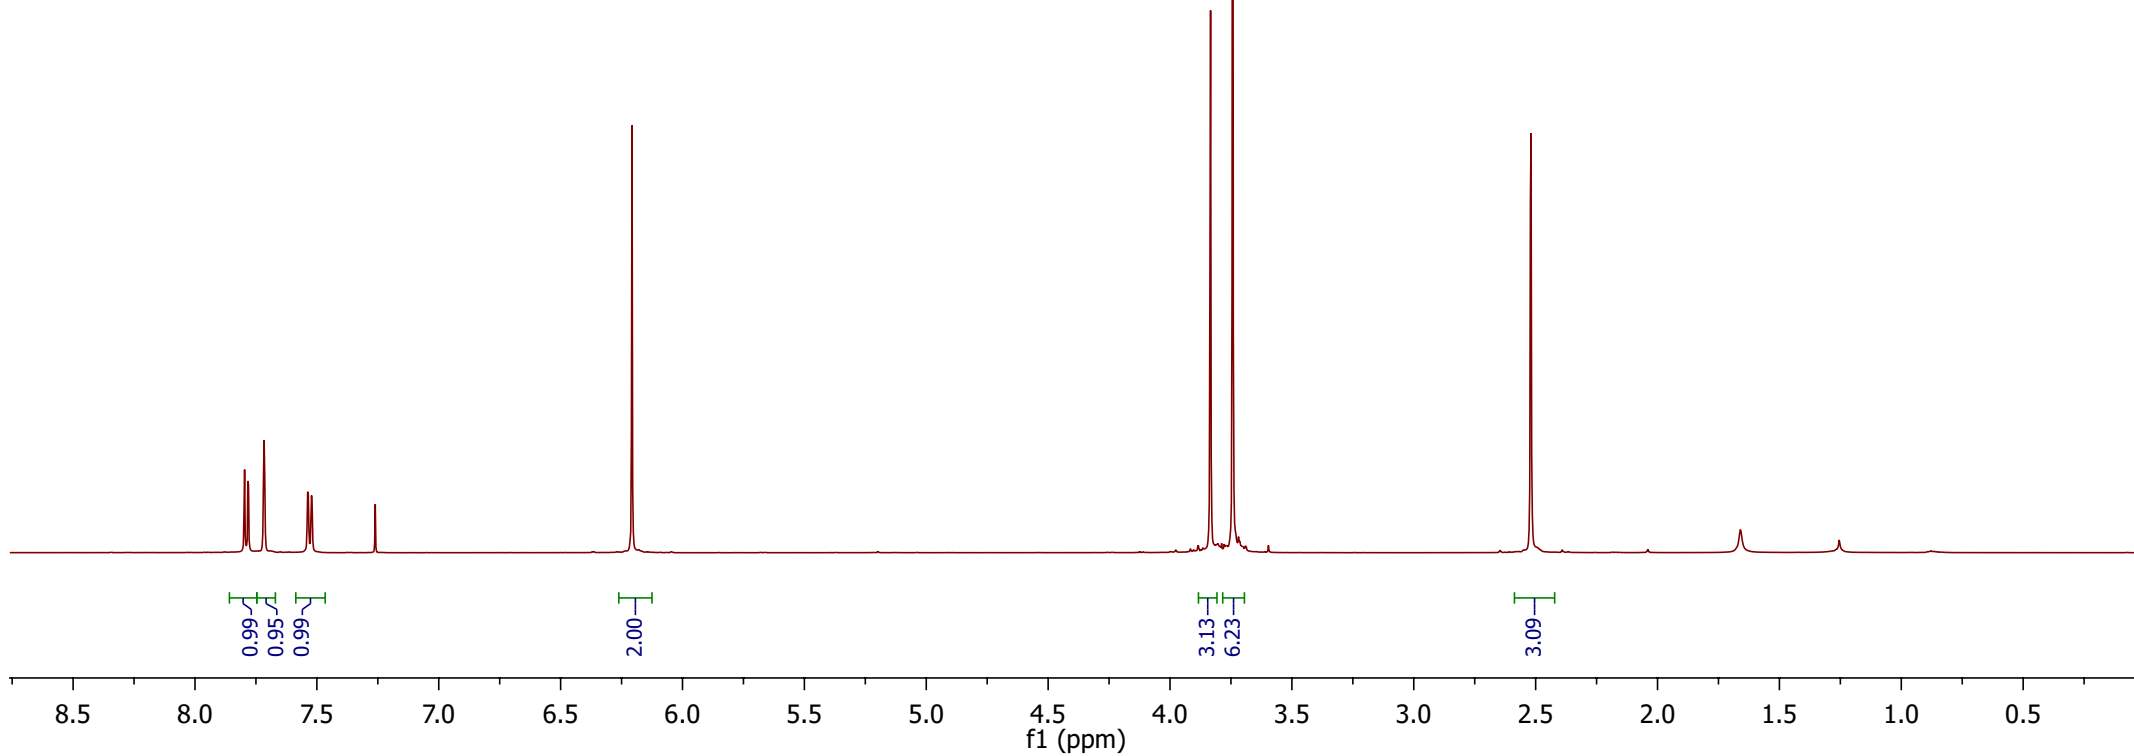

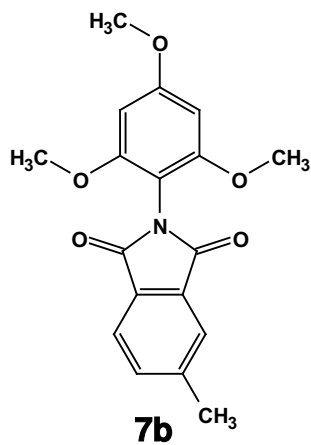

<sup>13</sup>C NMR (125 MHz, CDCl<sub>3</sub>)

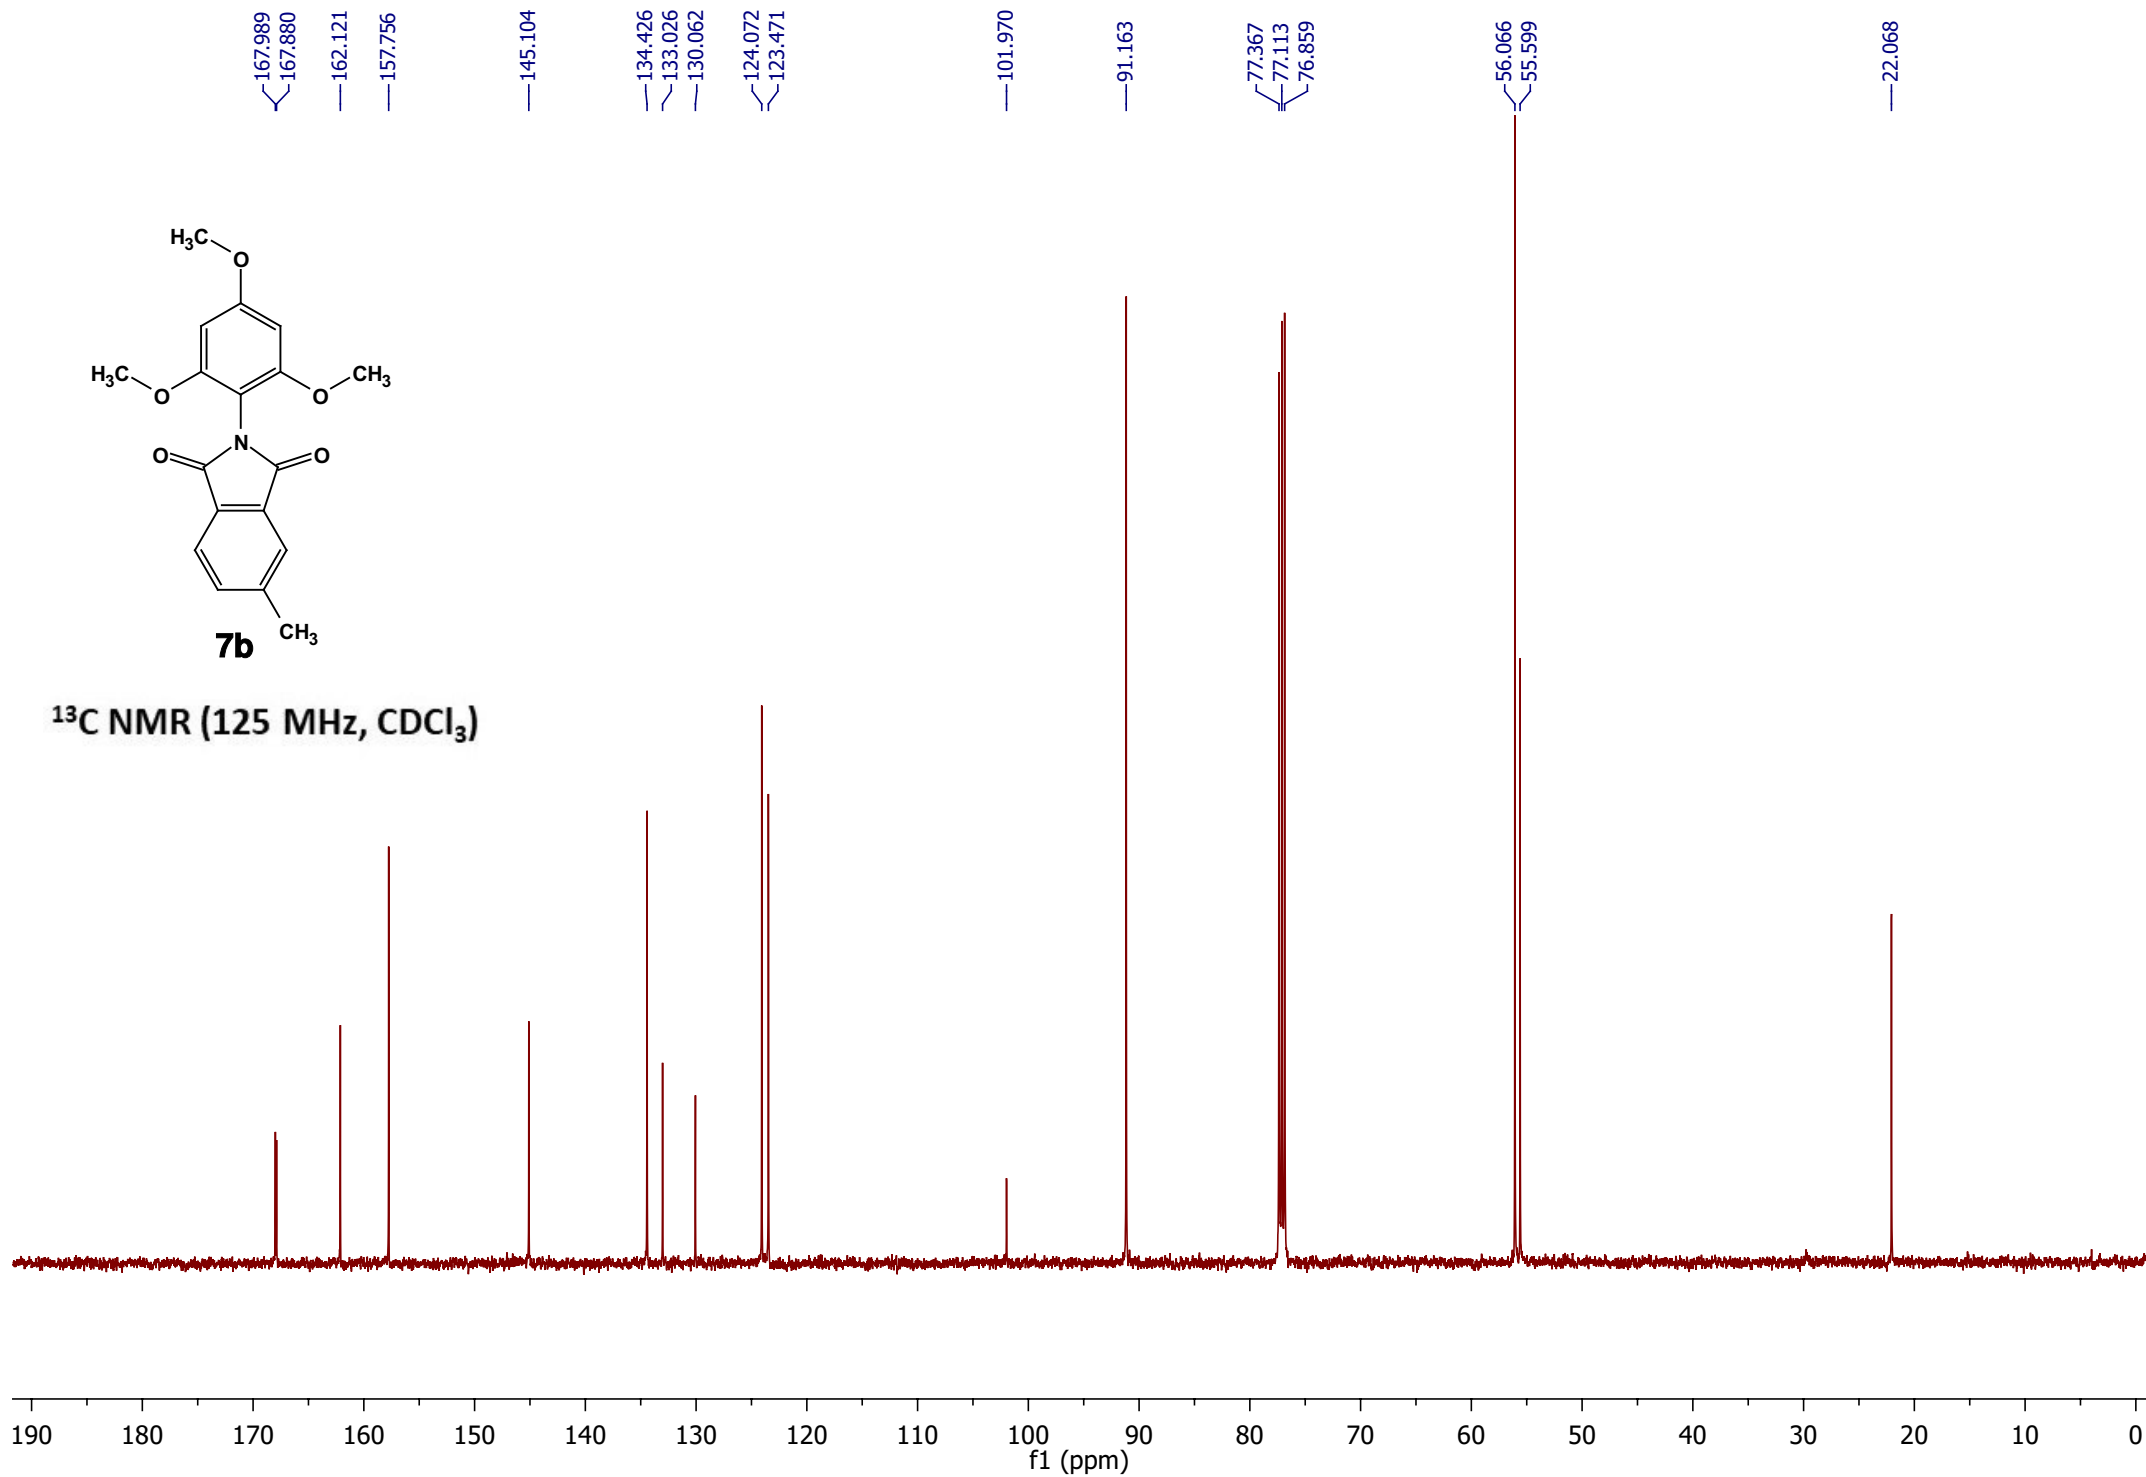

7.972  
7.962  
7.954  
7.807  
7.801  
7.796  
7.791

7.260

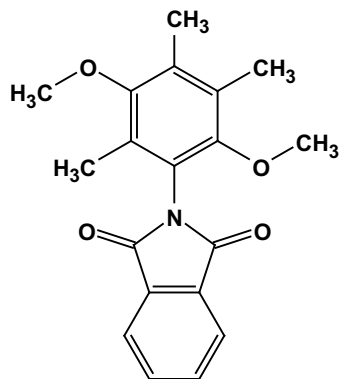

7c

<sup>1</sup>H NMR (500 MHz, CDCl<sub>3</sub>)

3.708  
3.556

2.254  
2.222  
2.086

1.604

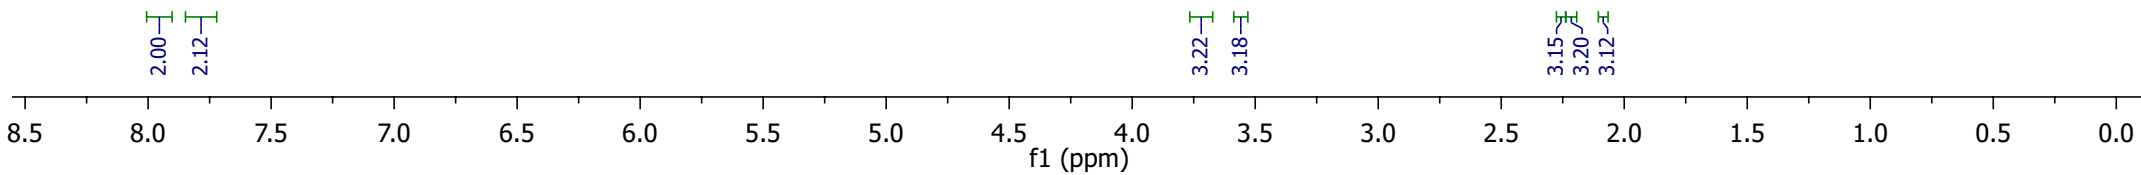

167.821

153.266  
151.631

134.405  
133.207  
132.276  
129.216  
128.537  
123.922  
122.430

77.414  
77.160  
76.907

61.501  
60.465

13.215  
13.062  
11.536

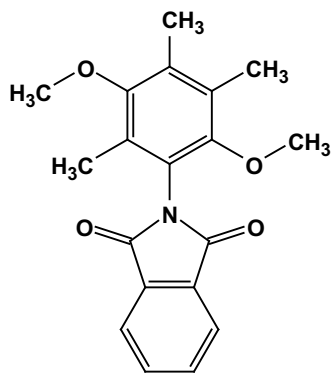

**7c**

<sup>13</sup>C NMR (125 MHz, CDCl<sub>3</sub>)

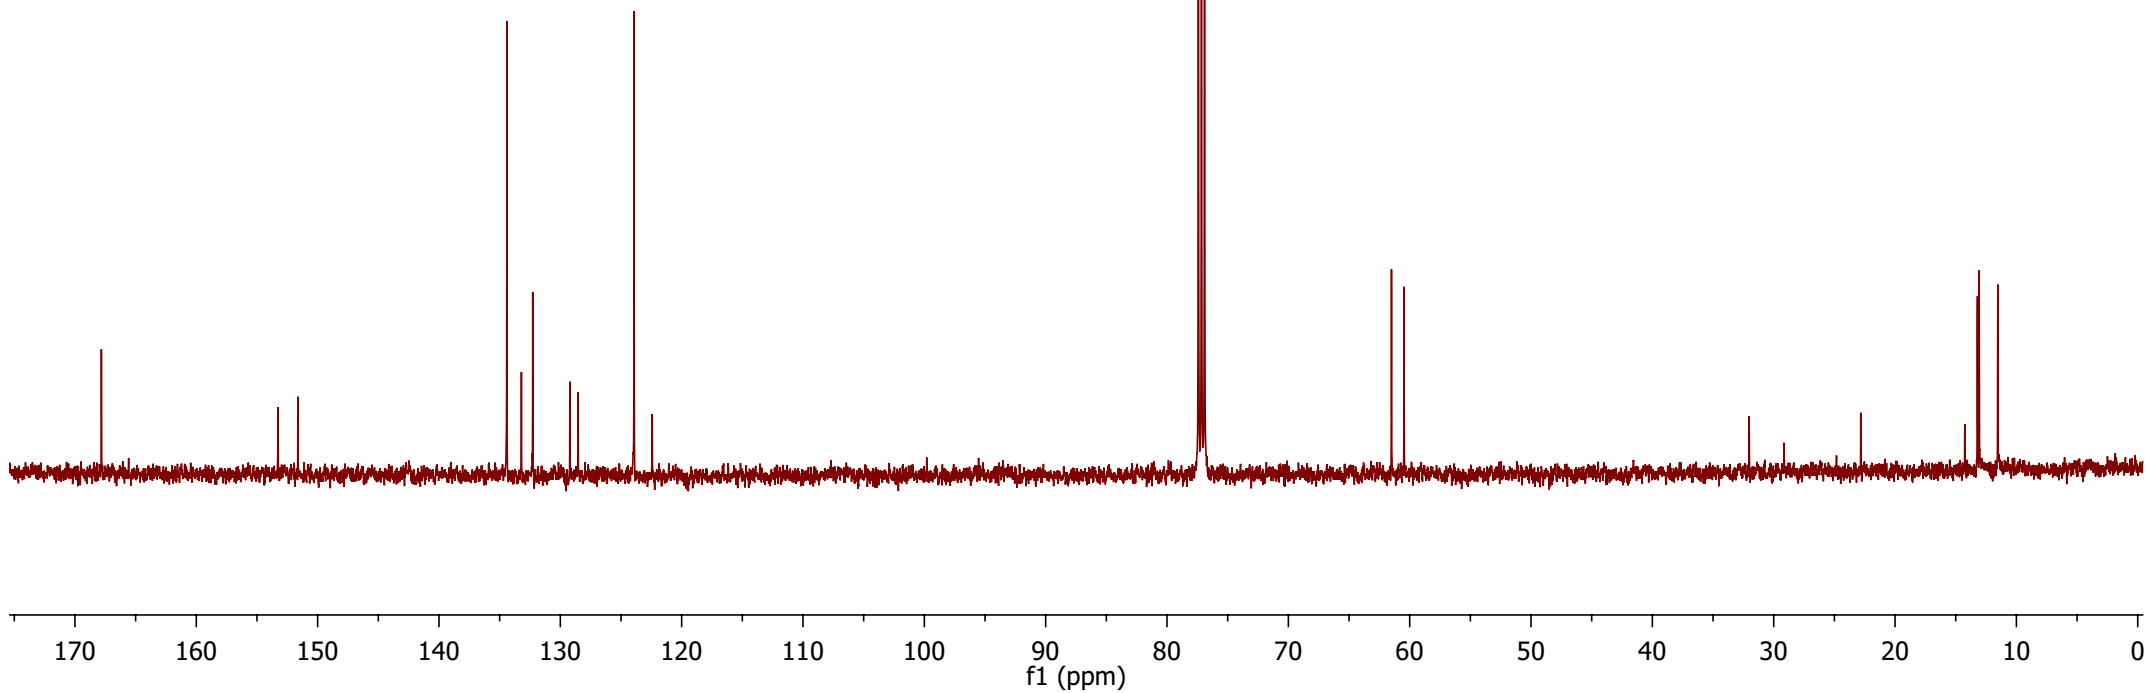

7.967  
7.961  
7.956  
7.951  
7.809  
7.801  
7.796  
7.791  
7.785  
7.260

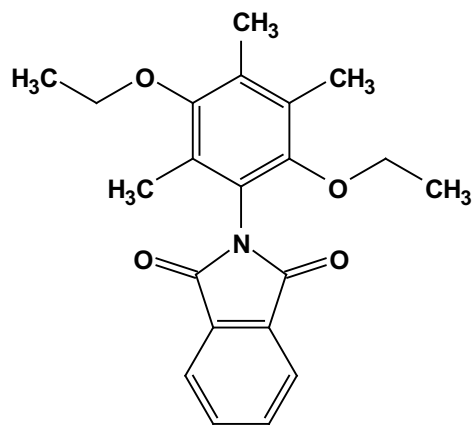

7d

<sup>1</sup>H NMR (500 MHz, CDCl<sub>3</sub>)

3.835  
3.820  
3.807  
3.793  
3.716  
3.702  
3.687  
3.673

2.235  
2.207  
2.071

1.426  
1.412  
1.398  
1.095  
1.081  
1.068

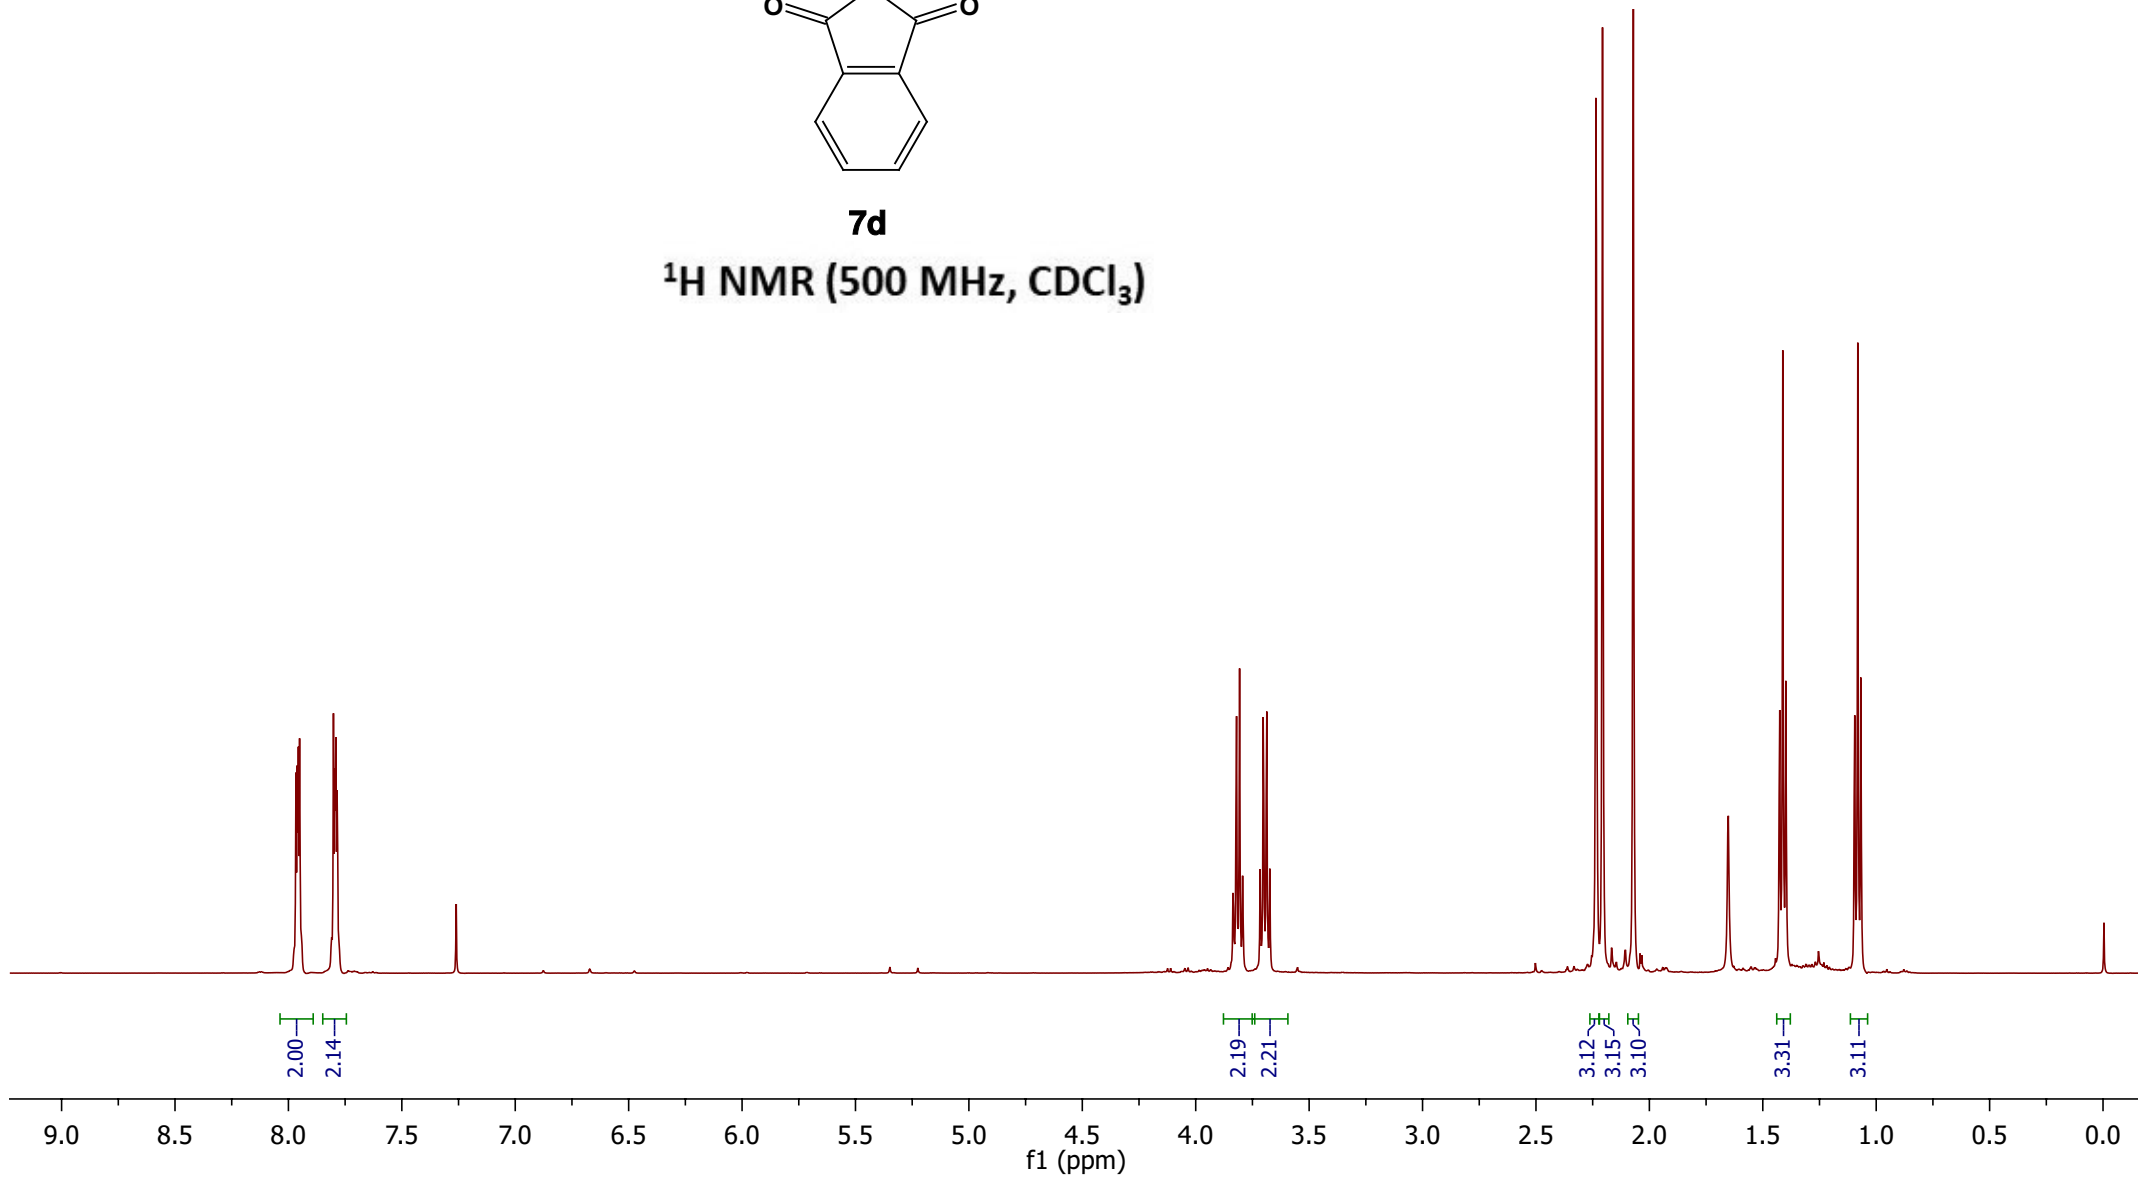

— 167.745

— 152.296  
— 150.734

— 134.365  
— 133.056  
— 132.247  
— 129.167  
— 128.527  
— 123.840  
— 122.525

— 77.413  
— 77.160  
— 76.906

— 69.860  
— 68.727

— 15.830  
— 15.749  
— 13.452  
— 13.319  
— 11.794

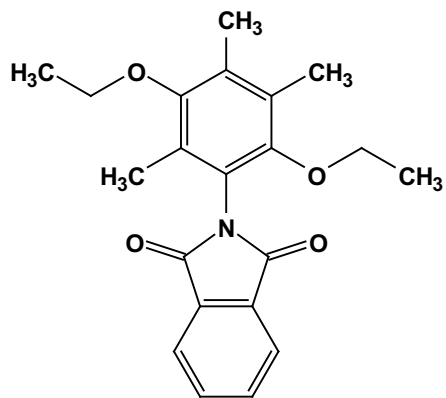

**7d**

<sup>13</sup>C NMR (125 MHz, CDCl<sub>3</sub>)

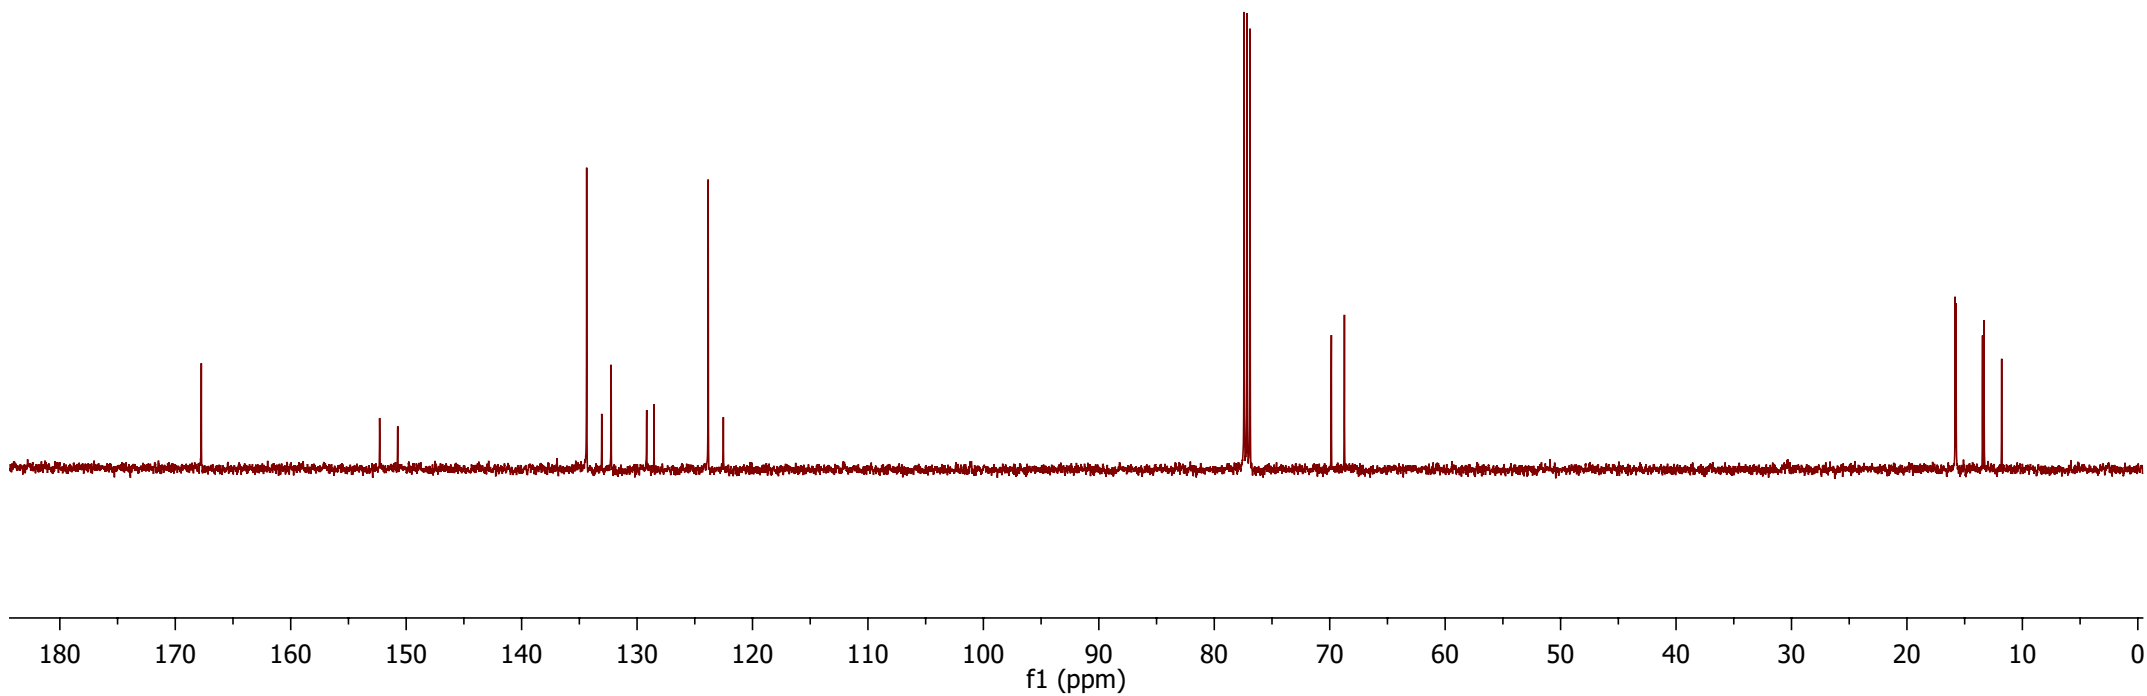

7.952  
7.945  
7.935  
7.928  
7.785  
7.777  
7.771  
7.768  
7.760  
7.450  
7.434  
7.410  
7.396  
7.381  
7.329  
7.314  
7.300  
7.260

6.464

3.840  
3.802

3.199

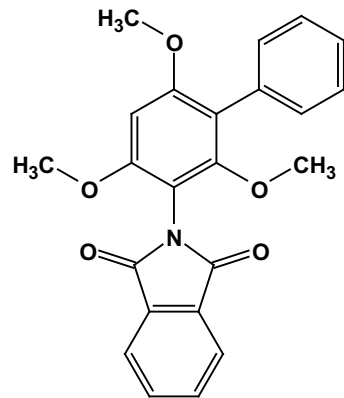

7e

<sup>1</sup>H NMR (500 MHz, CDCl<sub>3</sub>)

2.08

2.13

2.22

2.20

1.09

1.00

3.07

3.16

3.04

9.0 8.5 8.0 7.5 7.0 6.5 6.0 5.5 5.0 4.5 4.0 3.5 3.0 2.5 2.0 1.5 1.0 0.5

f1 (ppm)

168.055

159.188

156.841

156.533

134.131

133.398

132.575

131.097

128.051

127.135

123.741

117.316

106.742

92.054

77.415

77.160

76.905

61.102

56.197

56.160

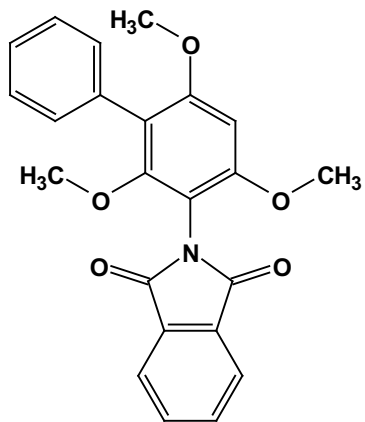

**7e**

**<sup>13</sup>C NMR (125 MHz, CDCl<sub>3</sub>)**

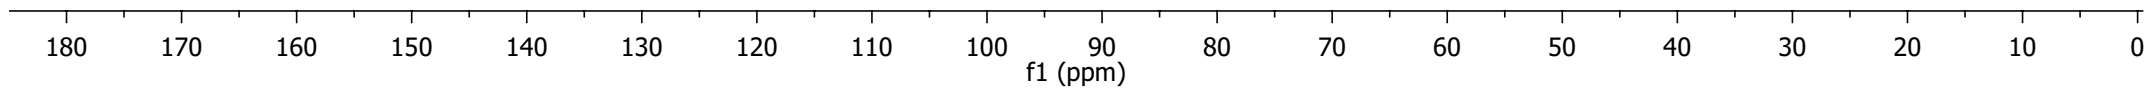



7.952  
7.946  
7.942  
7.936  
7.795  
7.785  
7.778

7.260

6.424

3.951  
3.789  
3.771

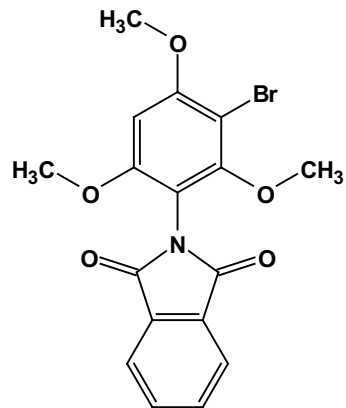

**7f**

**<sup>1</sup>H NMR (500 MHz, CDCl<sub>3</sub>)**

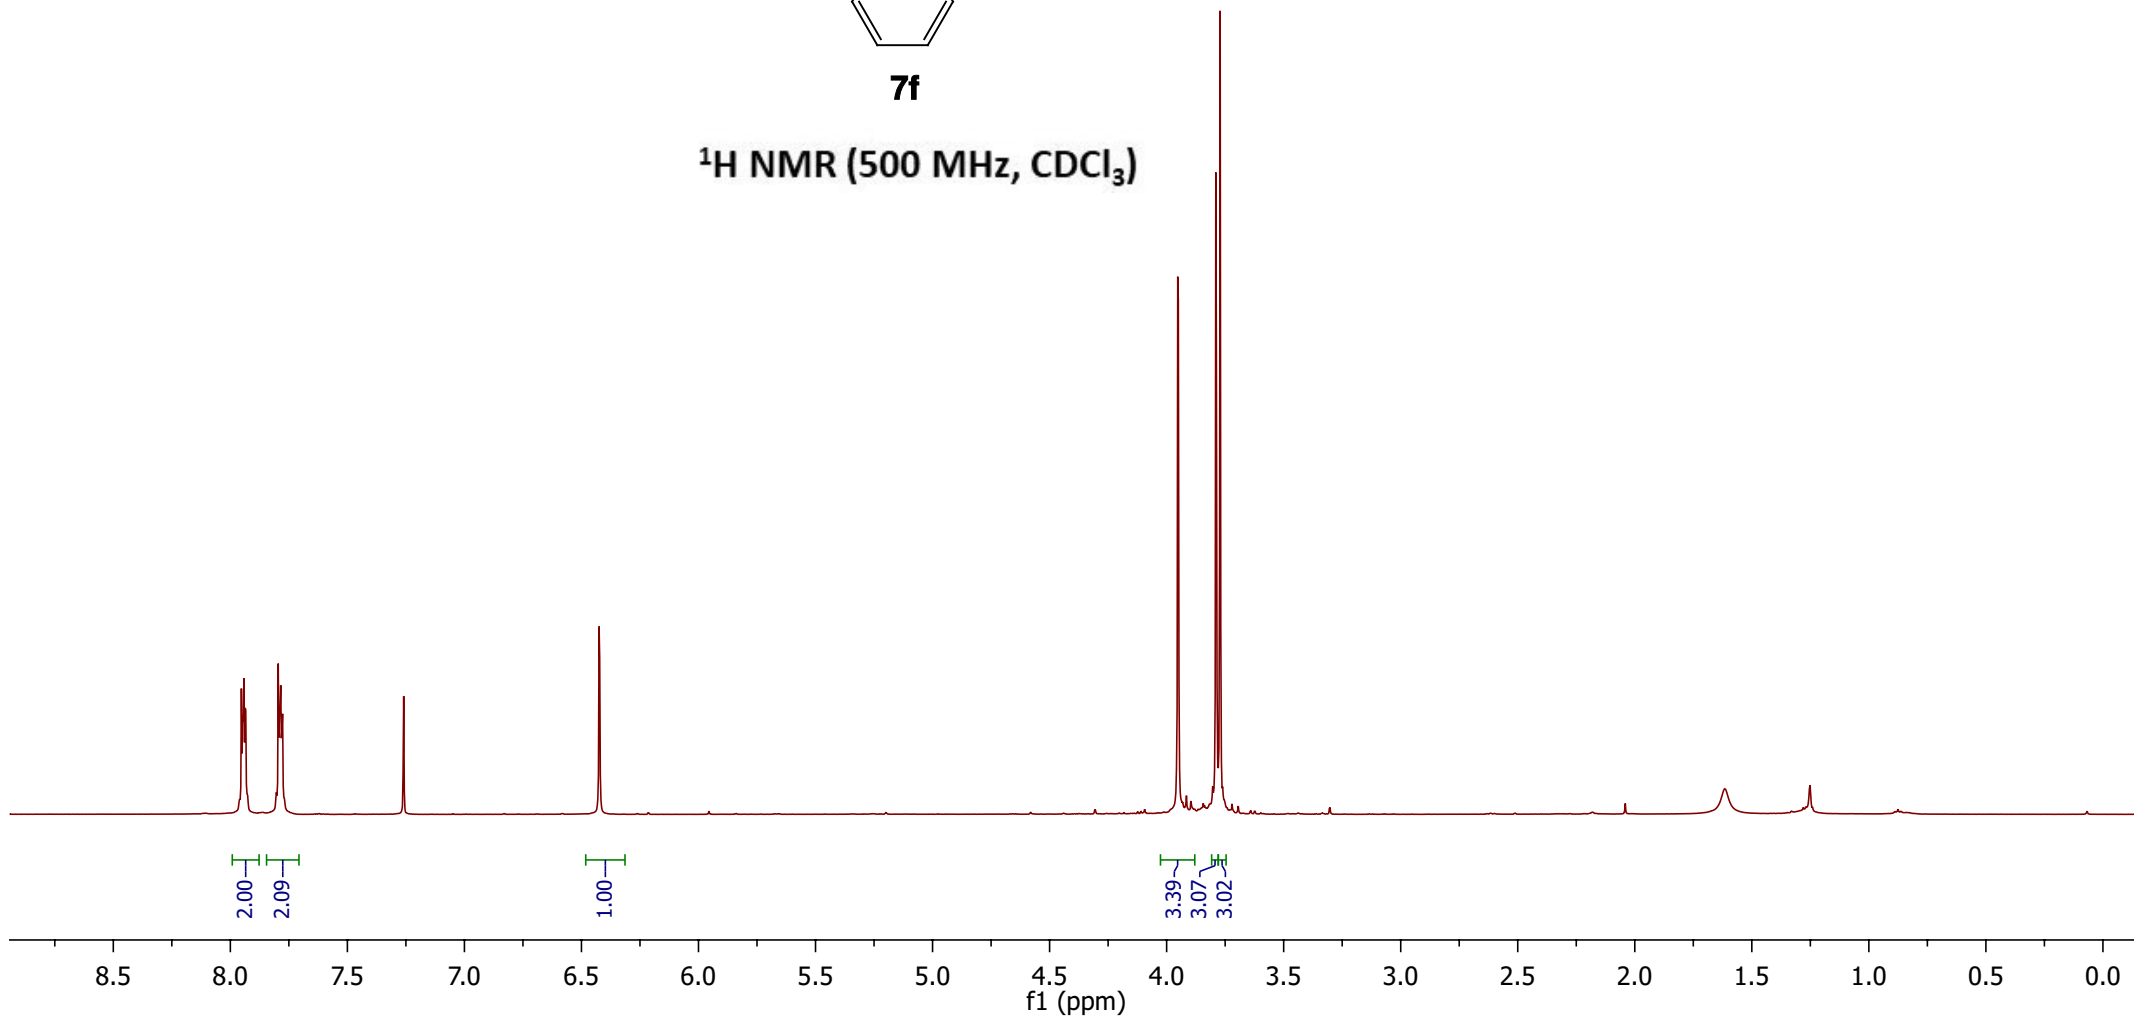

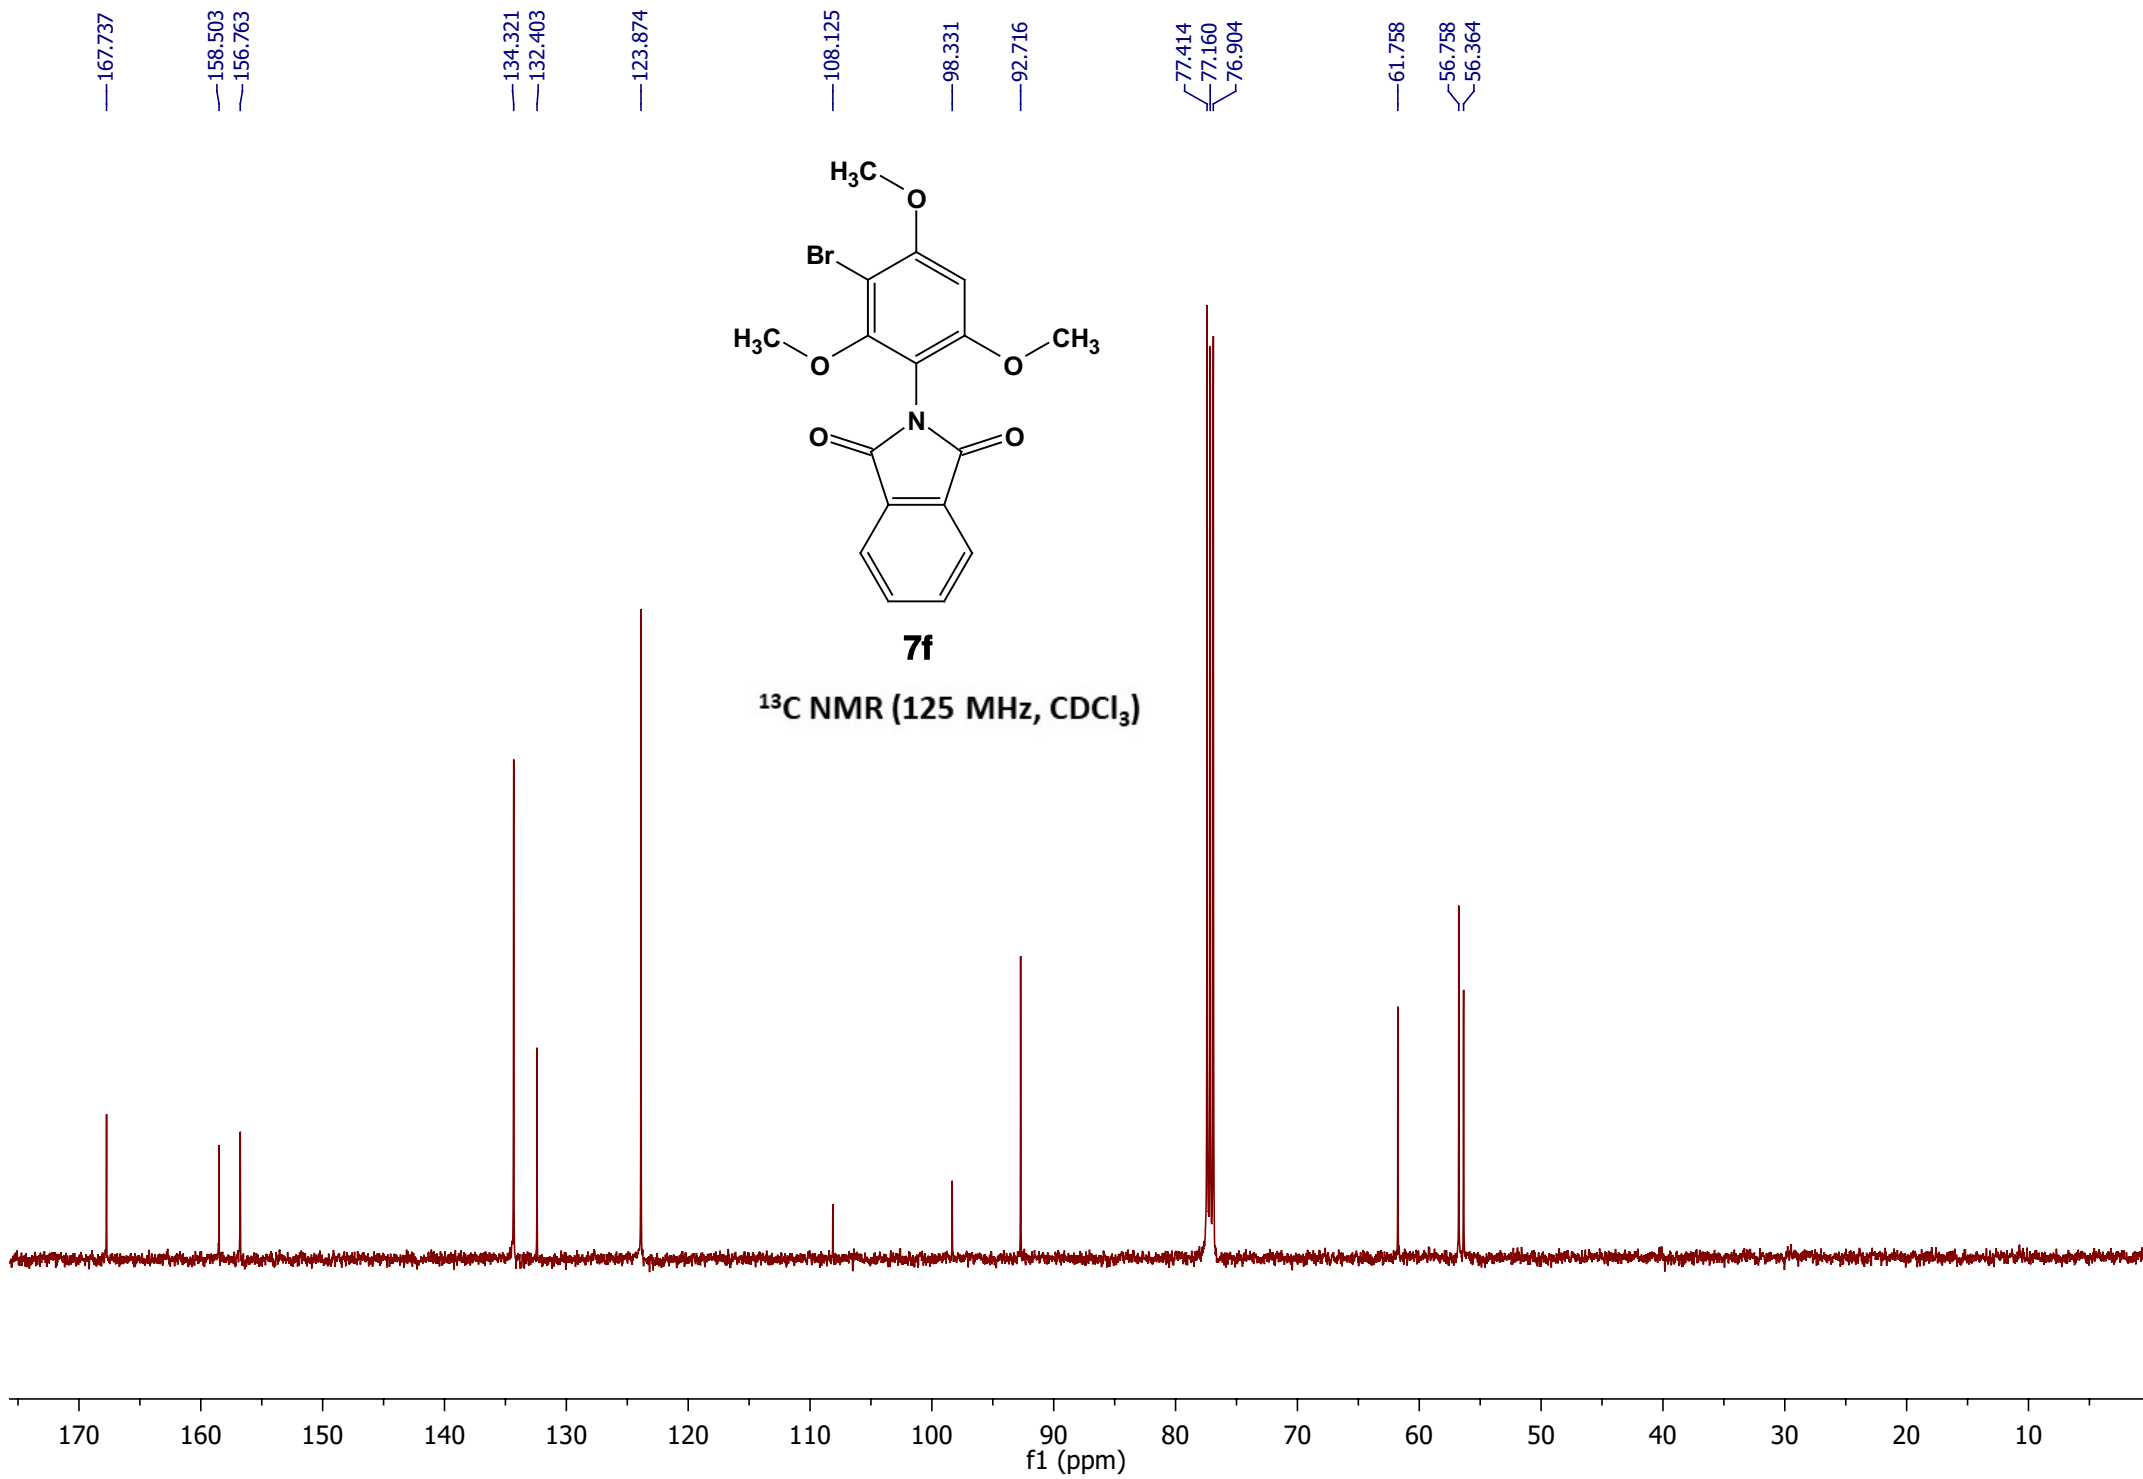

7.933  
7.928  
7.923  
7.917  
7.776  
7.771  
7.766  
7.760  
7.252  
7.248

6.611

3.949  
3.797

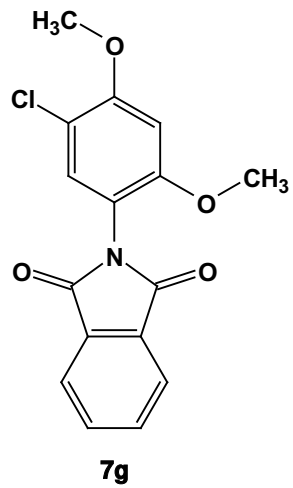

<sup>1</sup>H NMR (500 MHz, CDCl<sub>3</sub>)

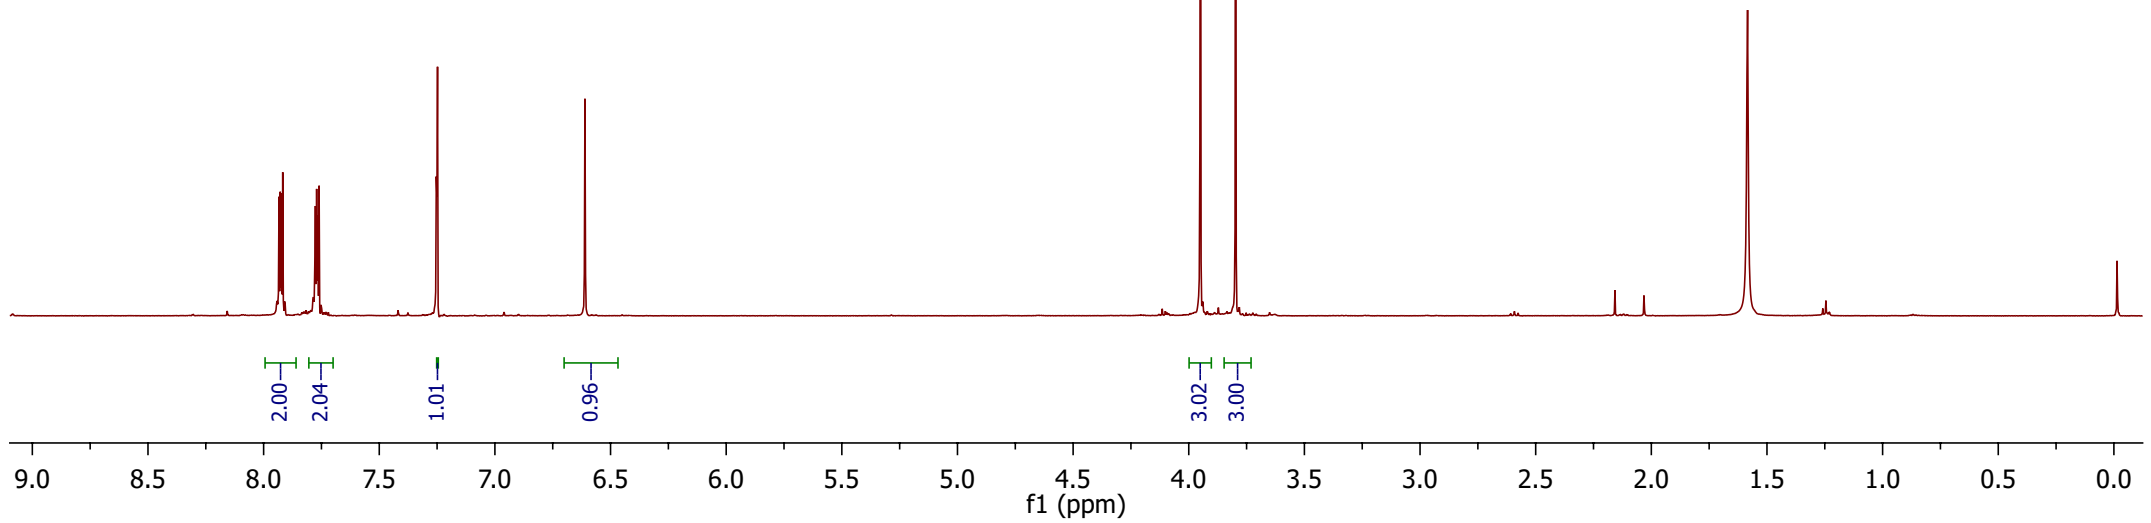

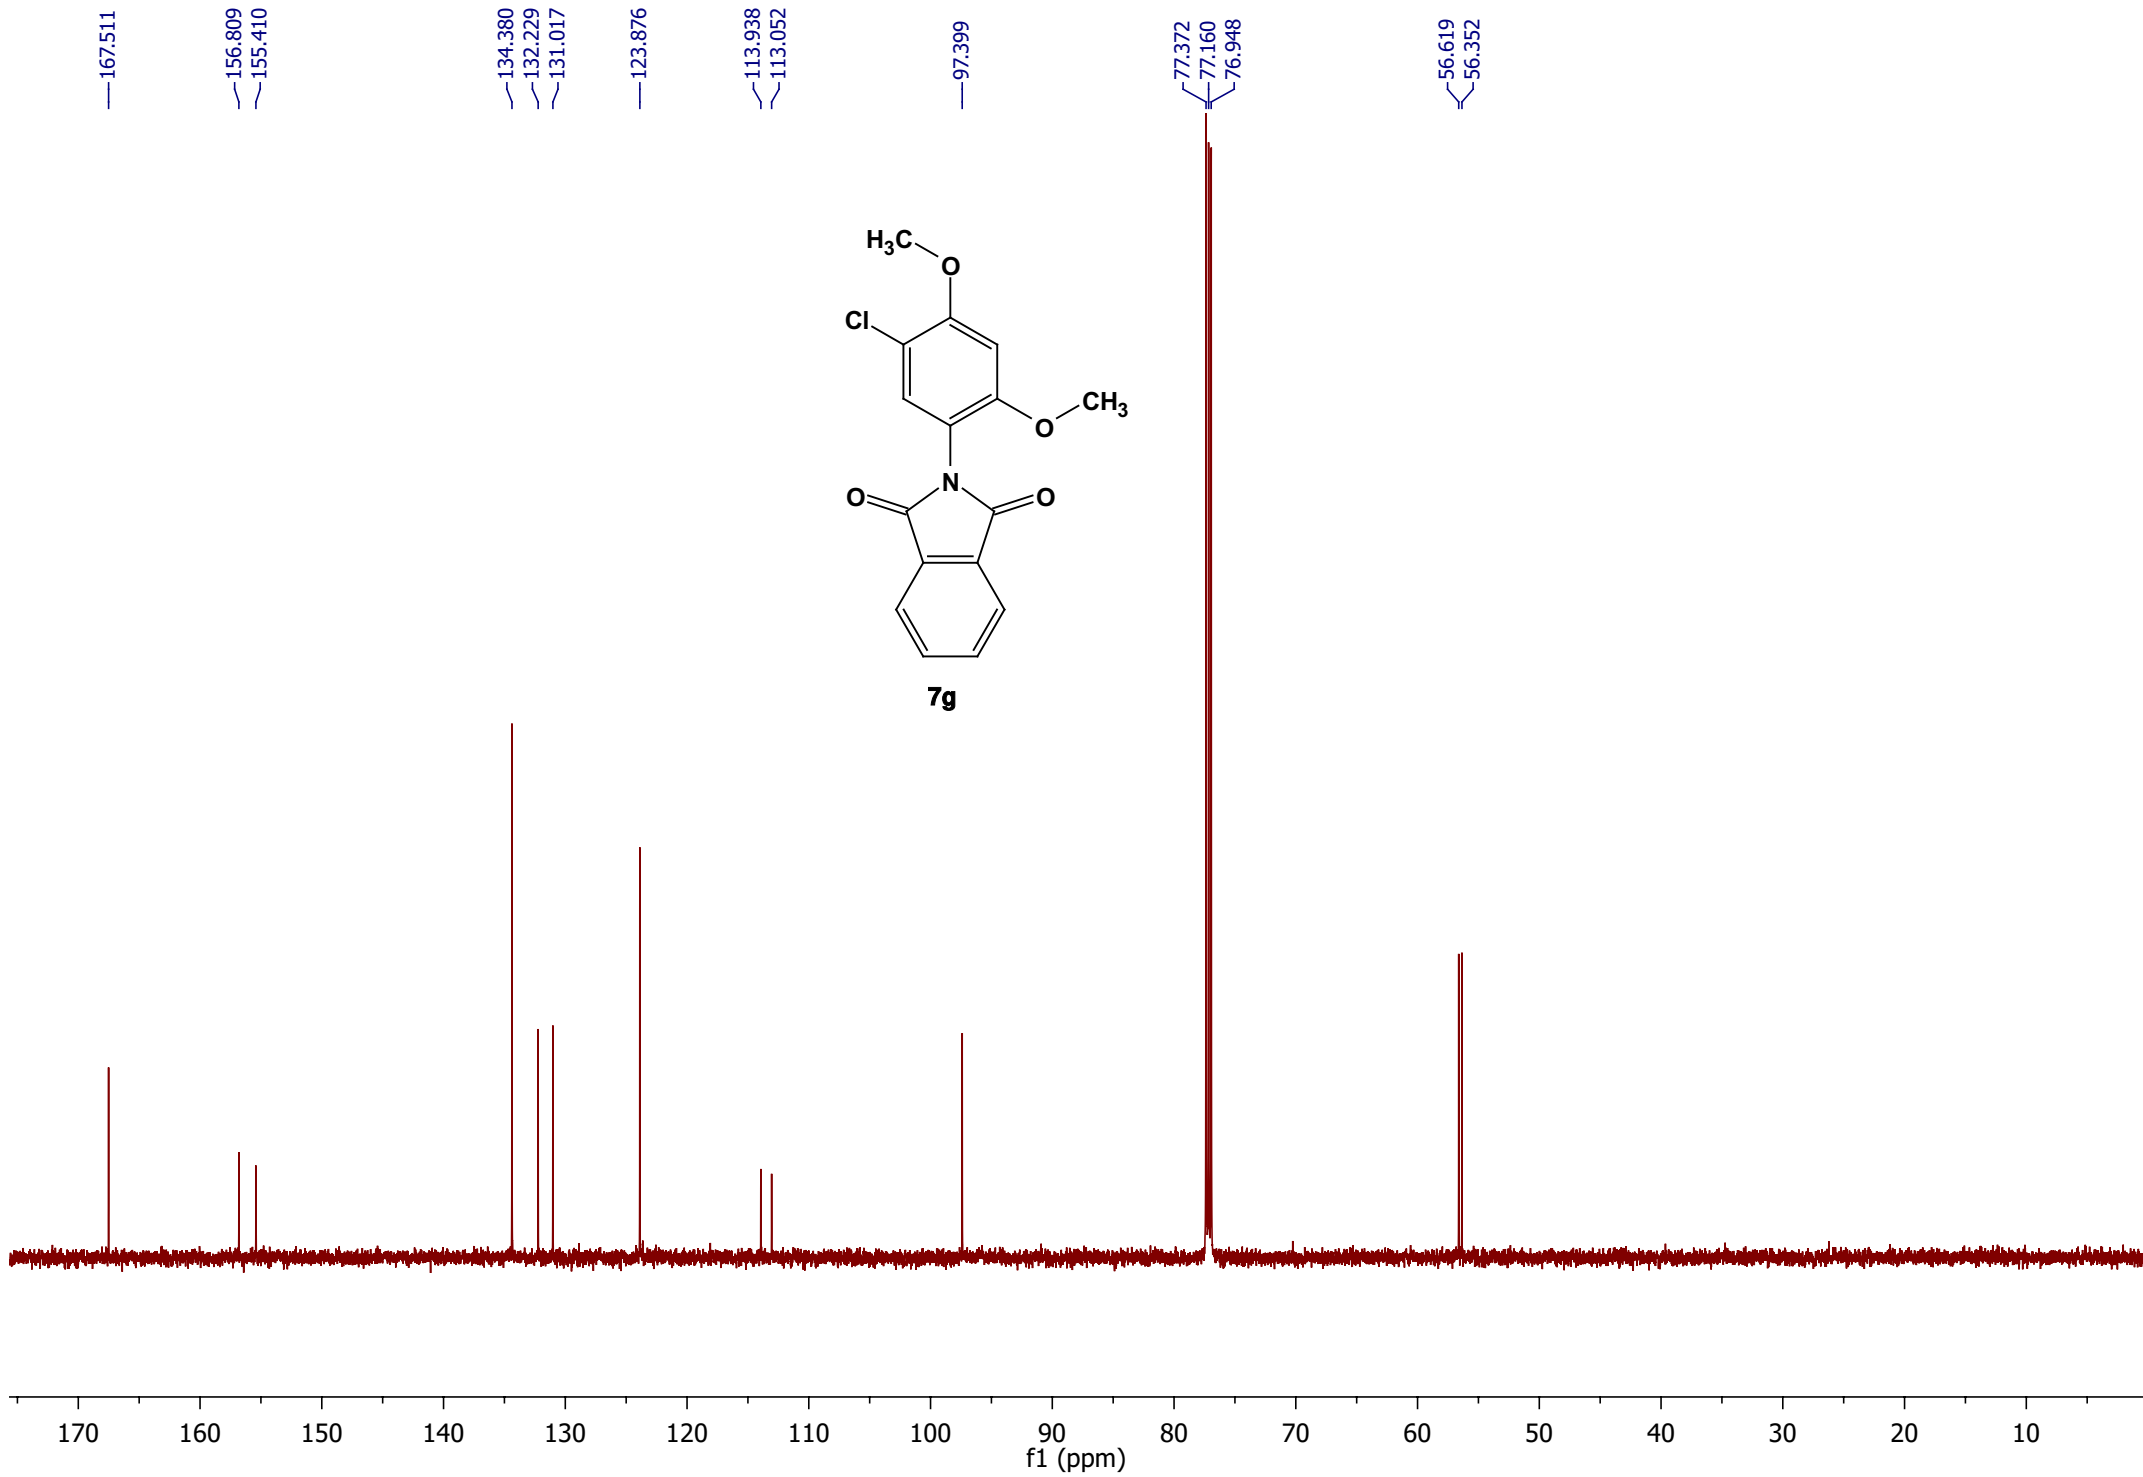

7.943  
7.937  
7.932  
7.927  
7.788  
7.779  
7.770  
7.415  
7.260

6.602

3.953  
3.807

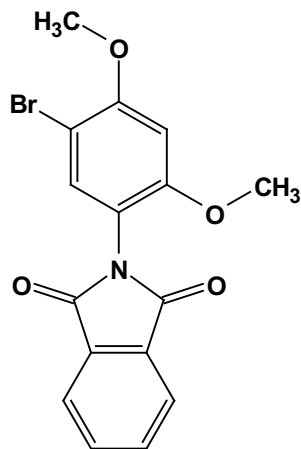

7h

<sup>1</sup>H NMR (500 MHz, CDCl<sub>3</sub>)

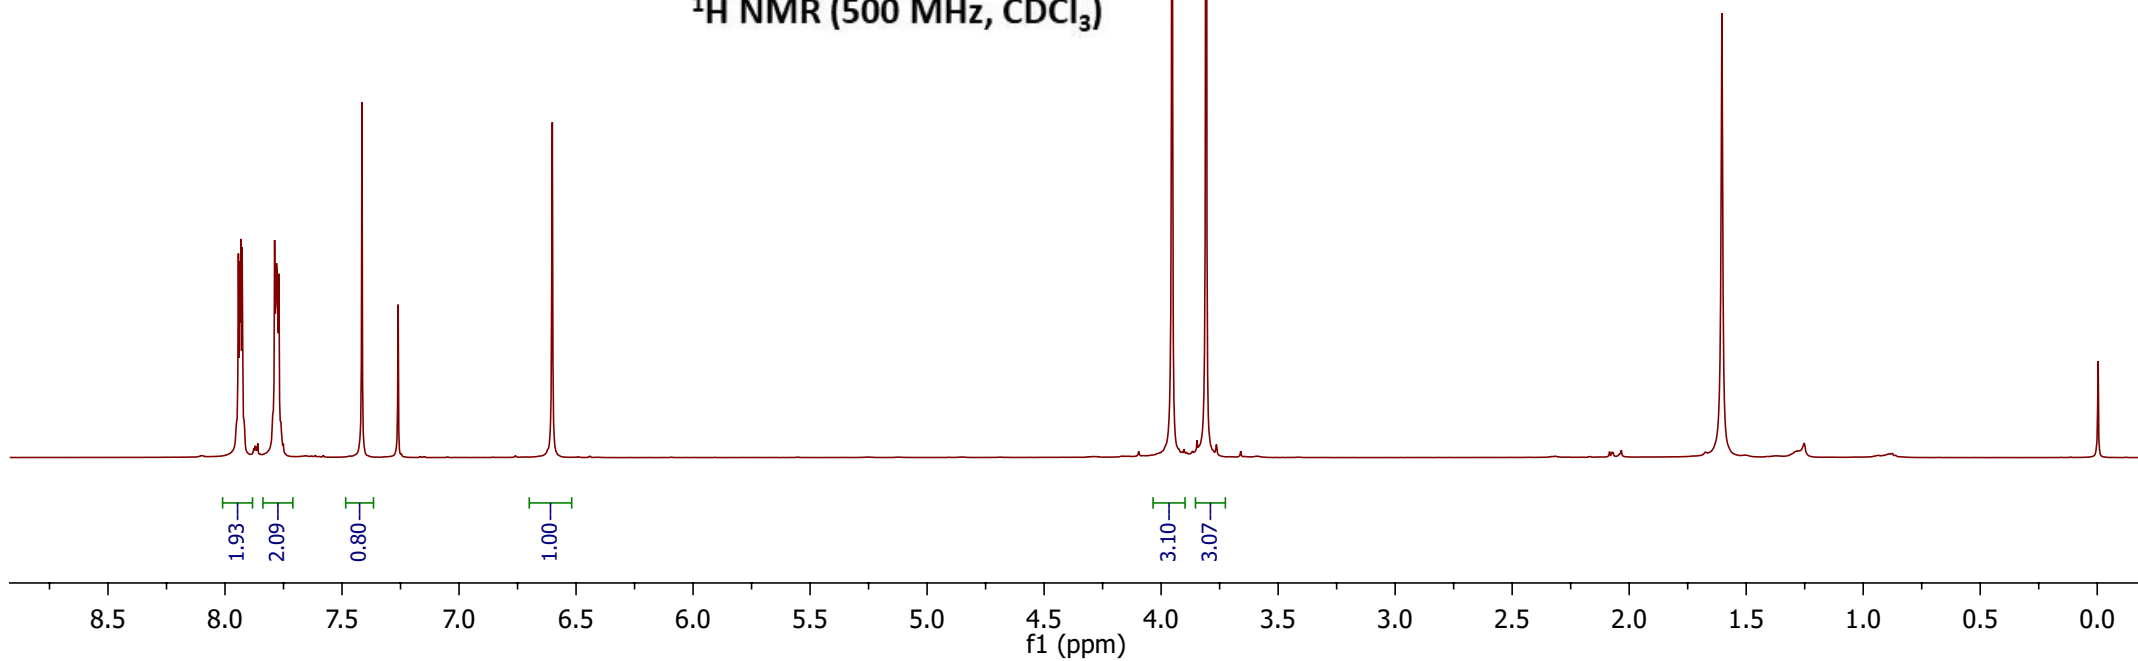

167.506

157.753  
156.169

134.376  
133.861  
132.237

123.871

113.602

101.878

97.224

77.414  
77.160  
76.907

56.714  
56.300

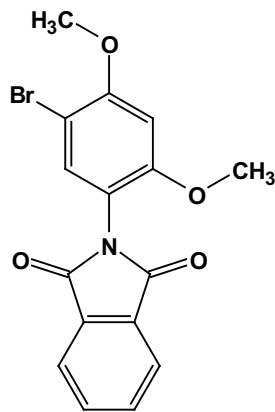

7h

<sup>13</sup>C NMR (125 MHz, CDCl<sub>3</sub>)

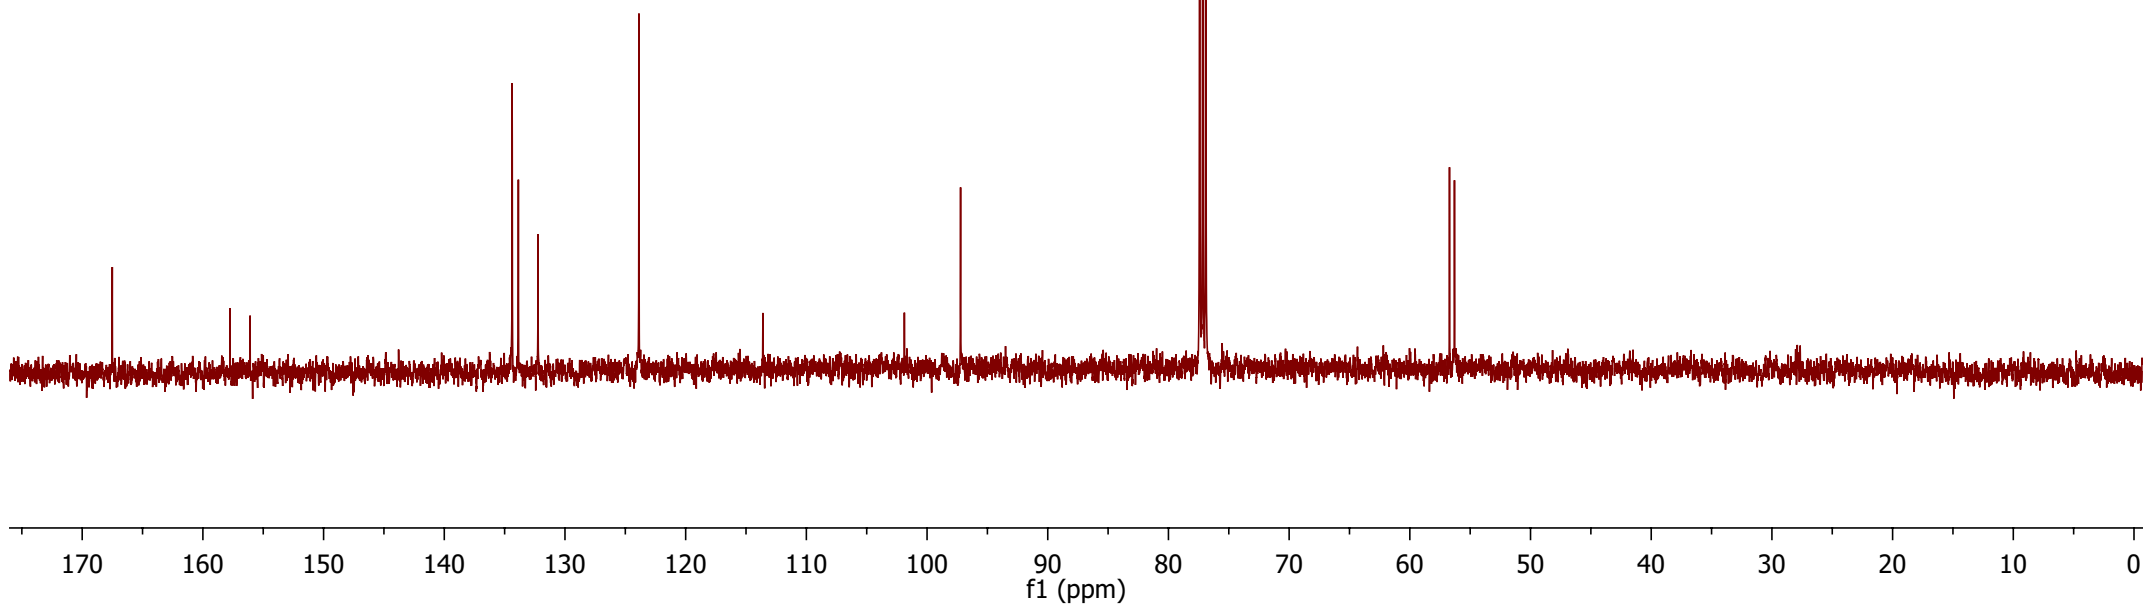

7.951  
7.947  
7.942  
7.792  
7.787  
7.783  
7.664  
7.651  
7.635  
7.621  
7.260  
7.210

6.683

3.896  
3.872

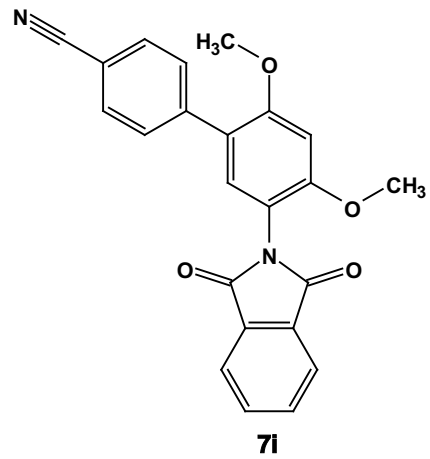

<sup>1</sup>H NMR (600 MHz, CDCl<sub>3</sub>)

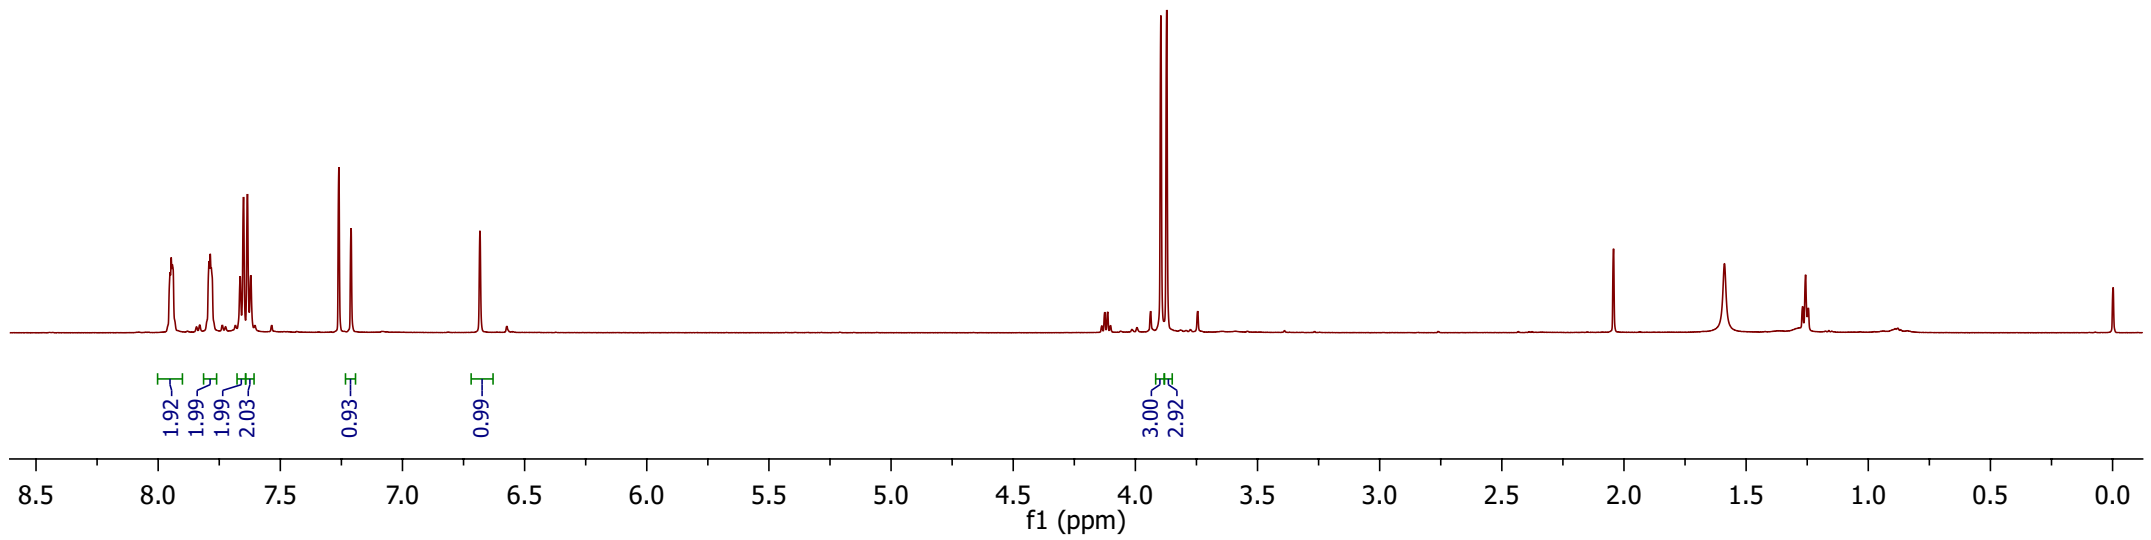

—167.756

—158.373  
—156.874

—142.302

—134.371  
—132.311  
—131.952  
—131.743  
—130.243

—123.853  
—121.400  
—119.278

—113.243  
—110.414

—96.707

—77.371  
—77.160  
—76.948

—56.243  
—56.129

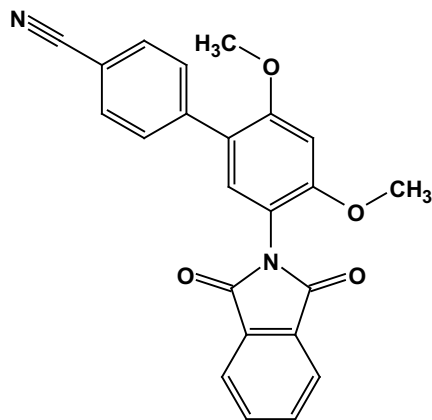

7i

<sup>13</sup>C NMR (150 MHz, CDCl<sub>3</sub>)

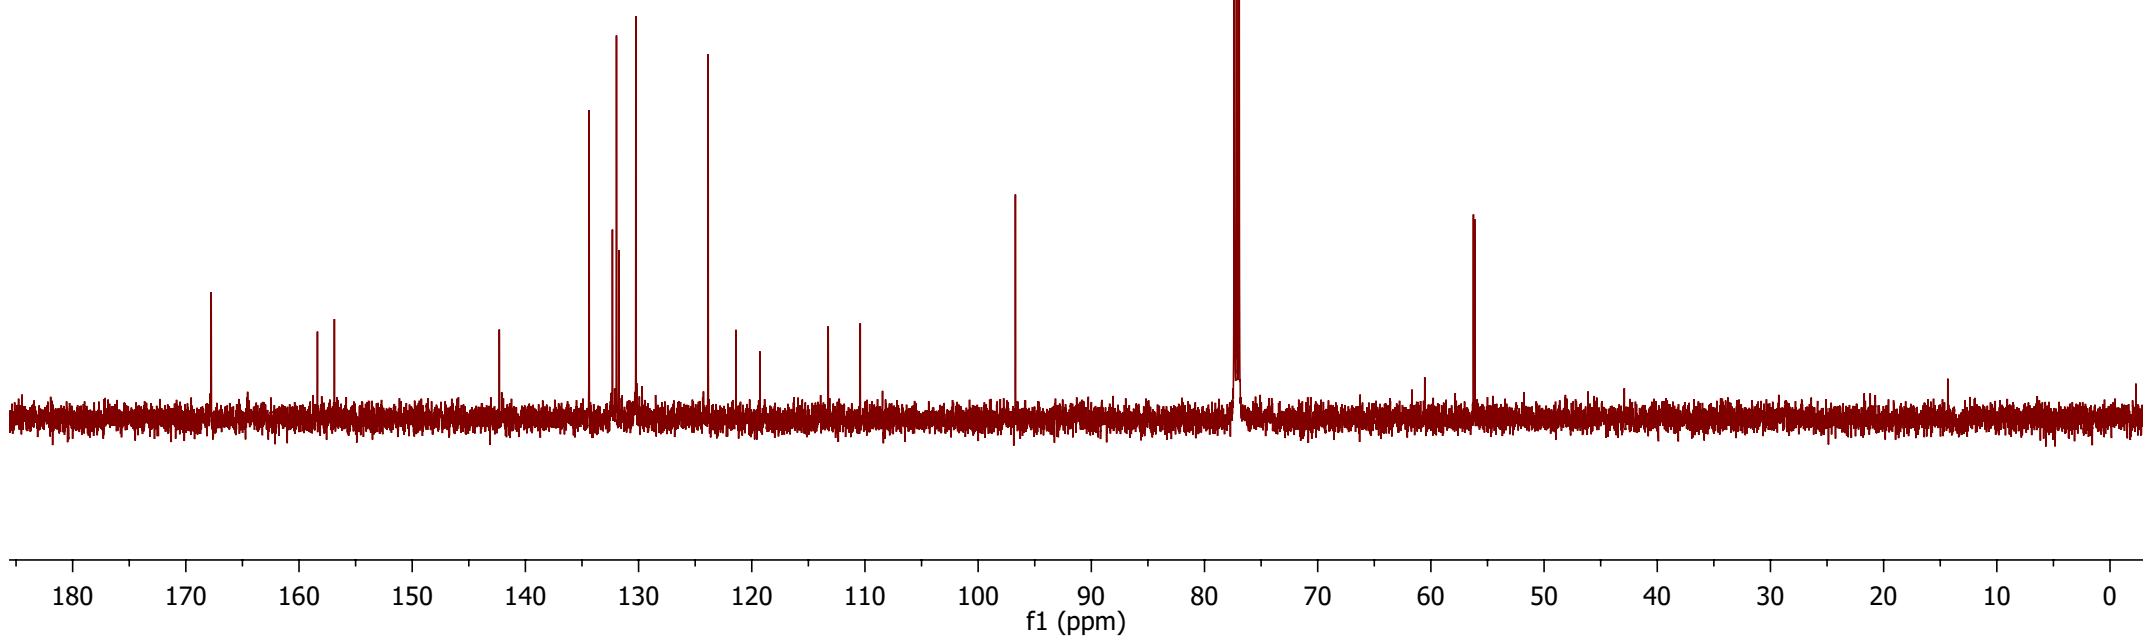



7.954  
7.948  
7.943  
7.938  
7.780  
7.775  
7.770  
7.764  
7.527  
7.512  
7.399  
7.383  
7.368  
7.311  
7.295  
7.260  
7.215  
6.685

3.874  
3.863

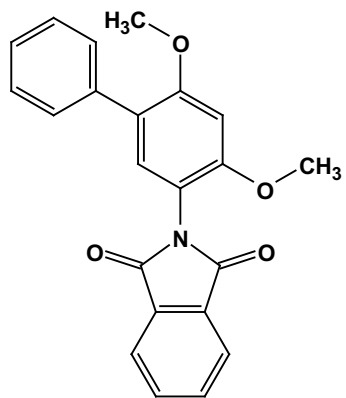

7j

<sup>1</sup>H NMR (500 MHz, CDCl<sub>3</sub>)

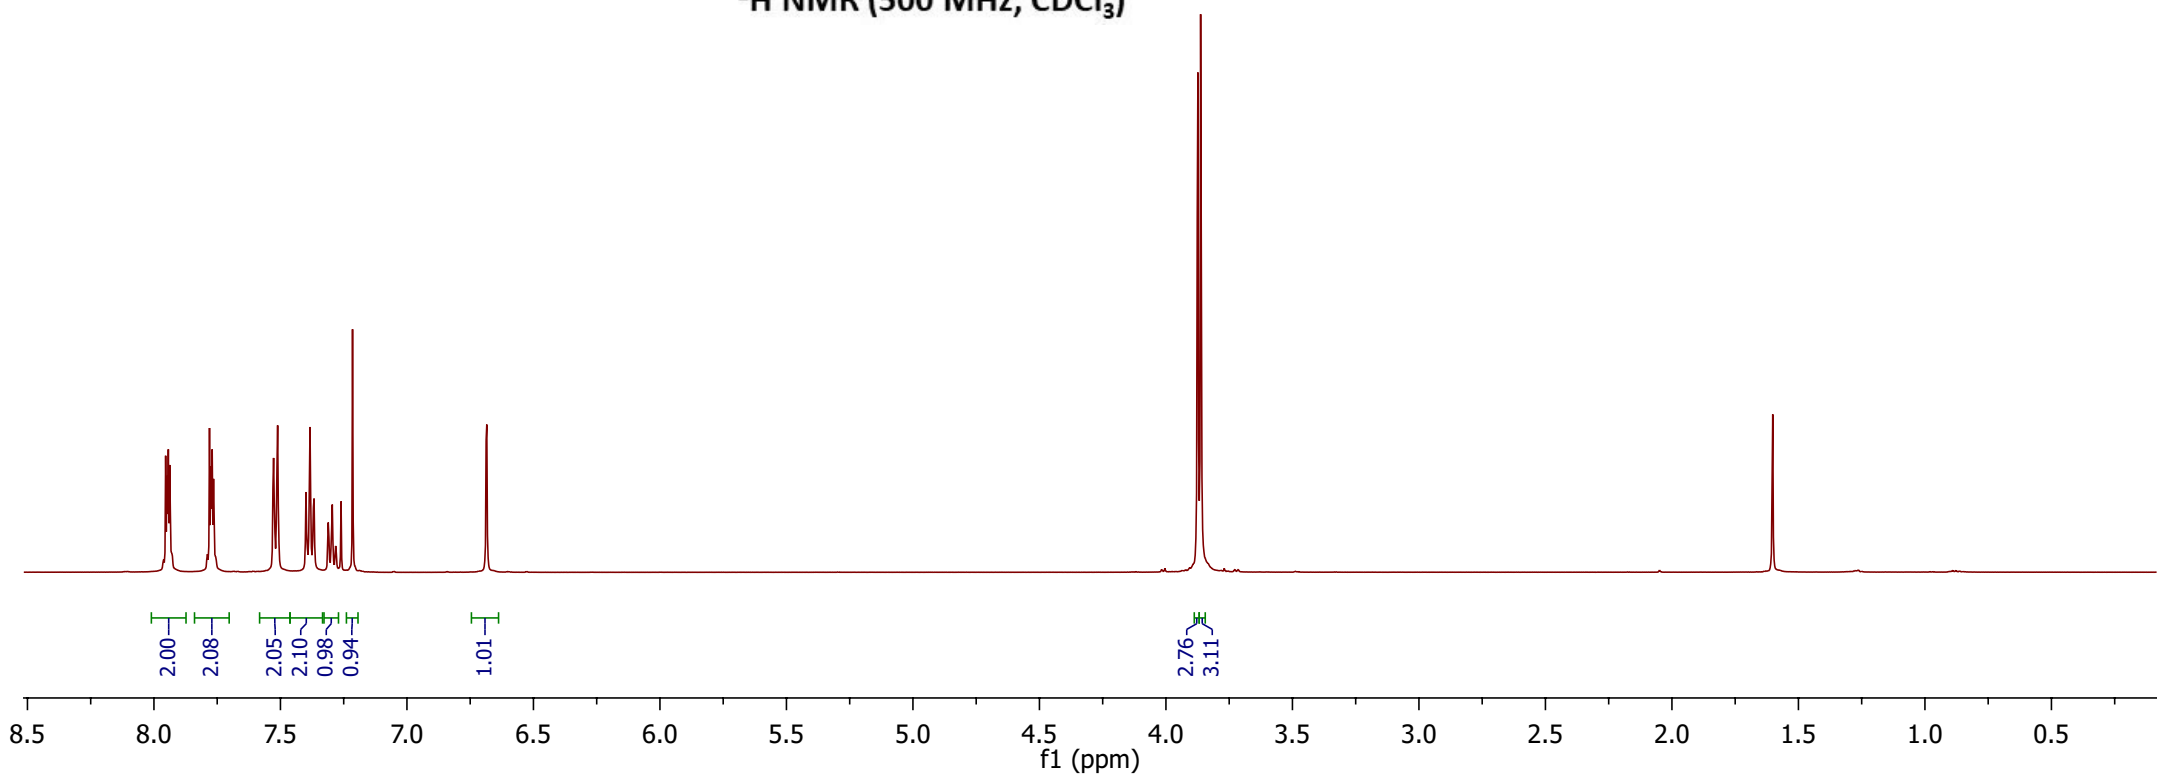

—167.836

—158.332

—155.851

—137.484

—134.214

—132.420

—131.846

—129.638

—128.140

—126.964

—123.756

—123.662

—112.864

—96.827

—77.414

—77.160

—76.906

—56.192

—56.098

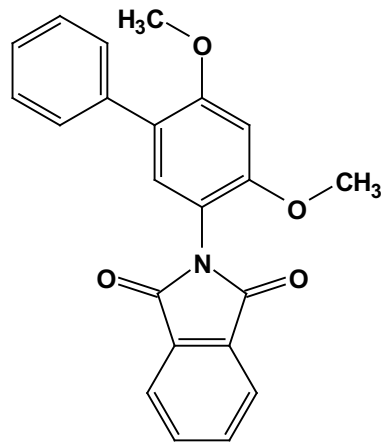

**7j**

**<sup>13</sup>C NMR (125 MHz, CDCl<sub>3</sub>)**

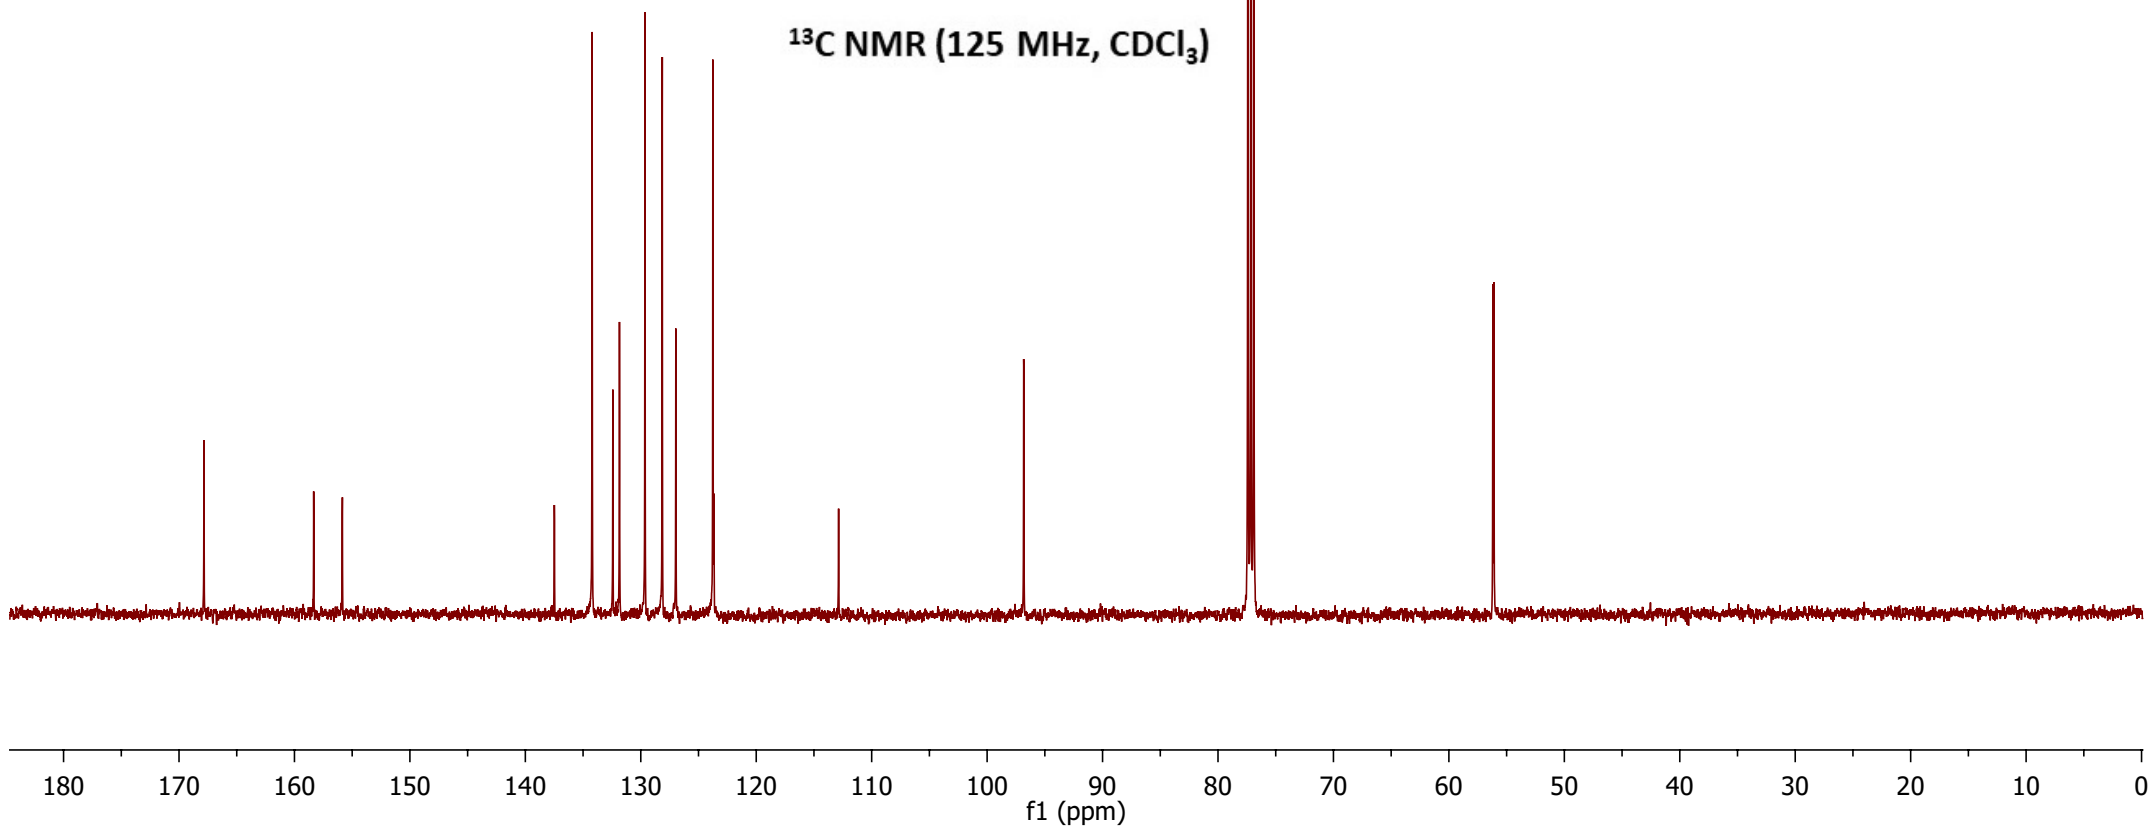

7.932  
7.929  
7.925  
7.920  
7.762  
7.759  
7.755  
7.750  
7.260  
7.176

6.532

3.824  
3.817

1.065  
1.052

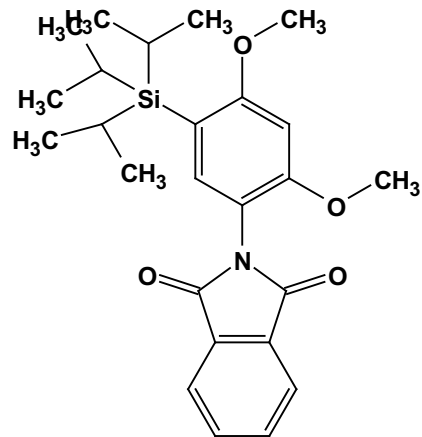

7k

<sup>1</sup>H NMR (600 MHz, CDCl<sub>3</sub>)

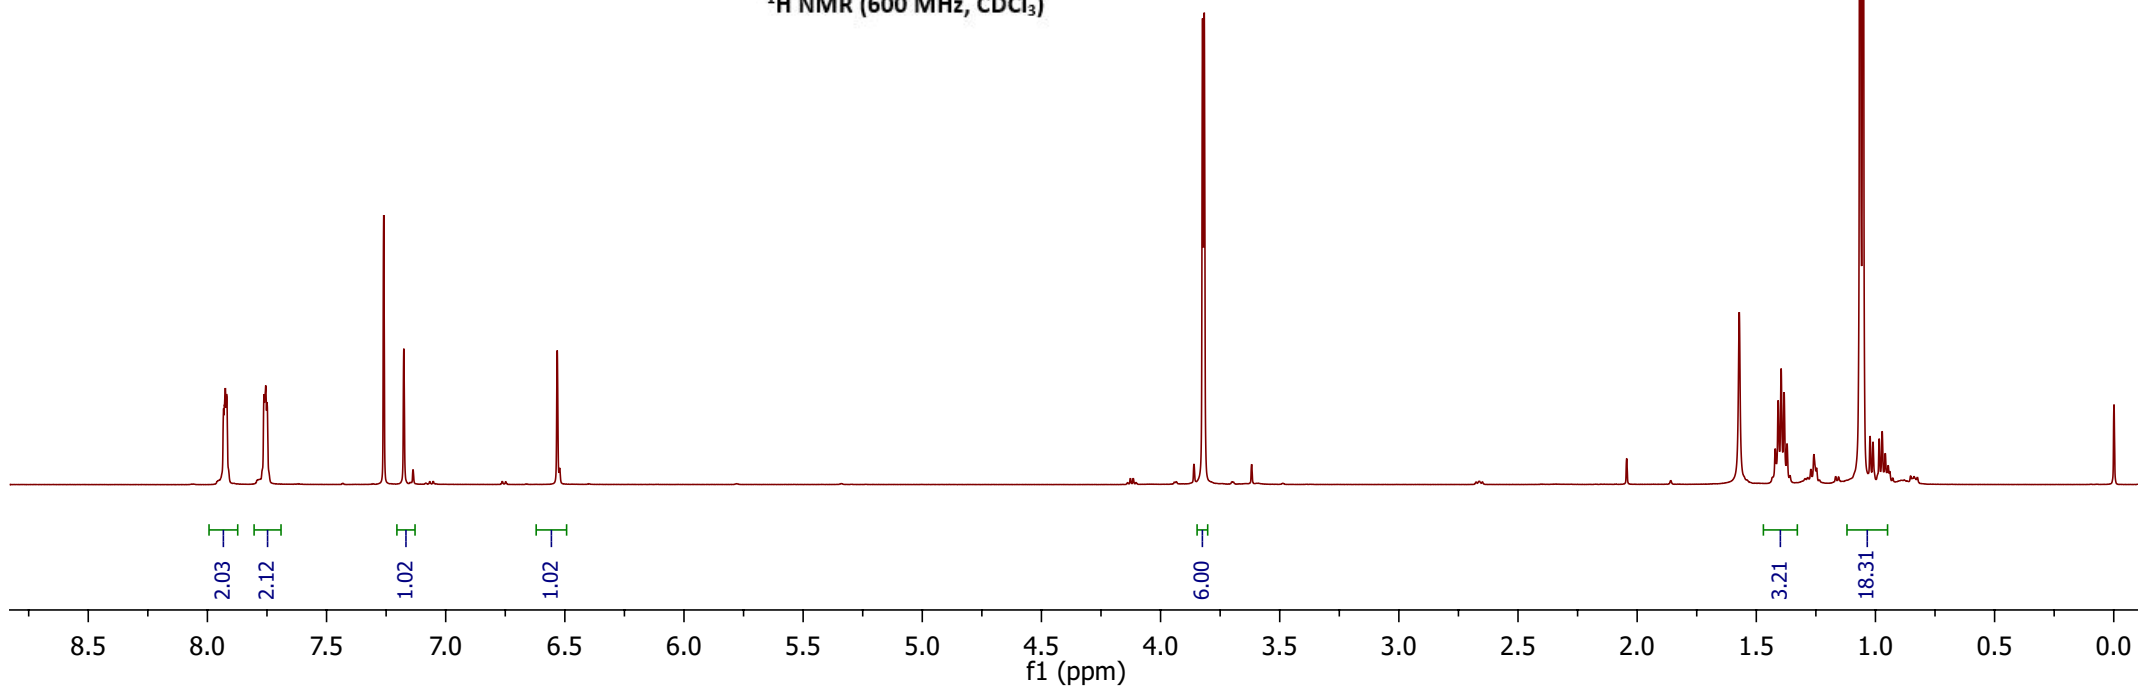

167.733  
166.473

157.126

137.712  
133.943  
132.401

123.529

114.279  
112.411

94.966

77.232  
77.000  
76.809

55.621  
54.879

18.839

11.587

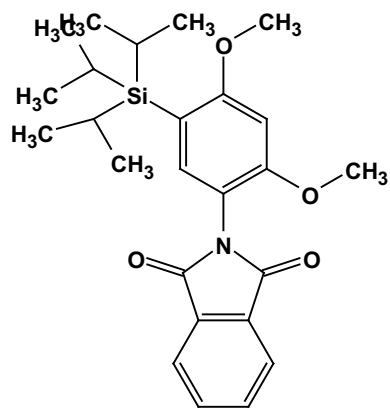

7k

<sup>13</sup>C NMR (150 MHz, CDCl<sub>3</sub>)

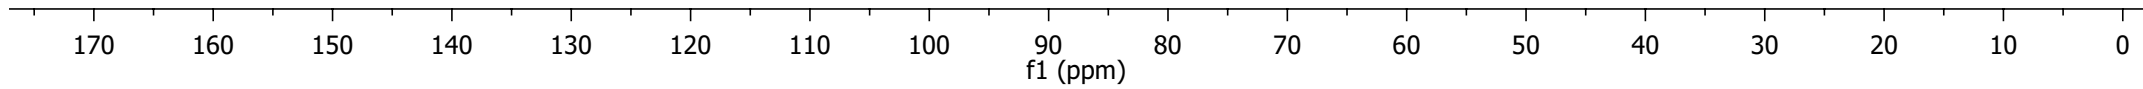

7.942  
7.932  
7.924  
7.771  
7.766  
7.761  
7.756

7.260  
7.141  
7.124

6.570  
6.552  
6.549

4.081  
4.067  
4.053  
4.039  
4.033  
4.028  
4.019  
4.004  
3.990

1.582  
1.444  
1.430  
1.417  
1.256  
1.241  
1.228

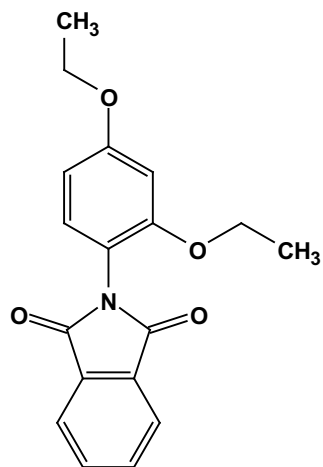

71

$^1\text{H NMR}$  (500 MHz,  $\text{CDCl}_3$ )

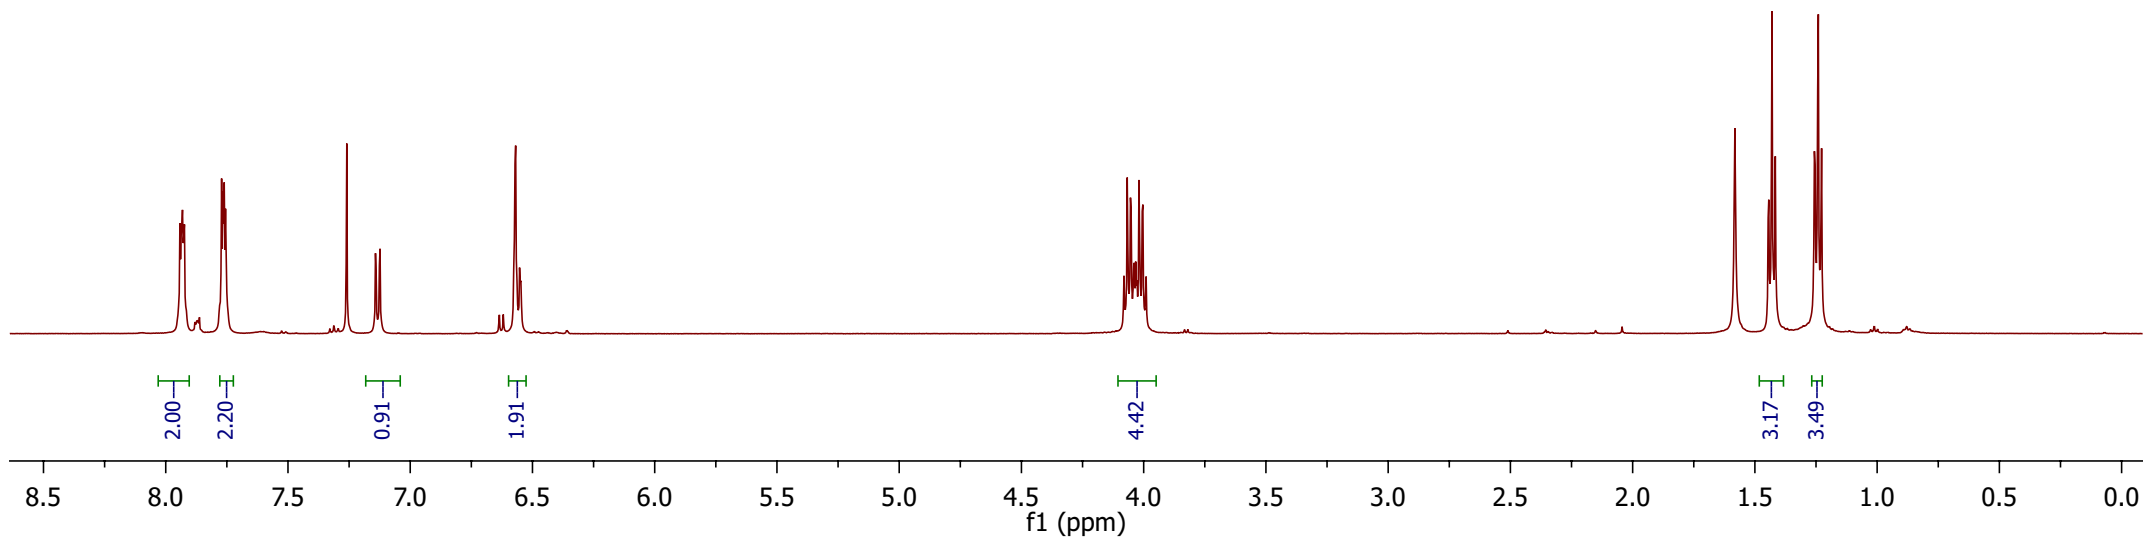

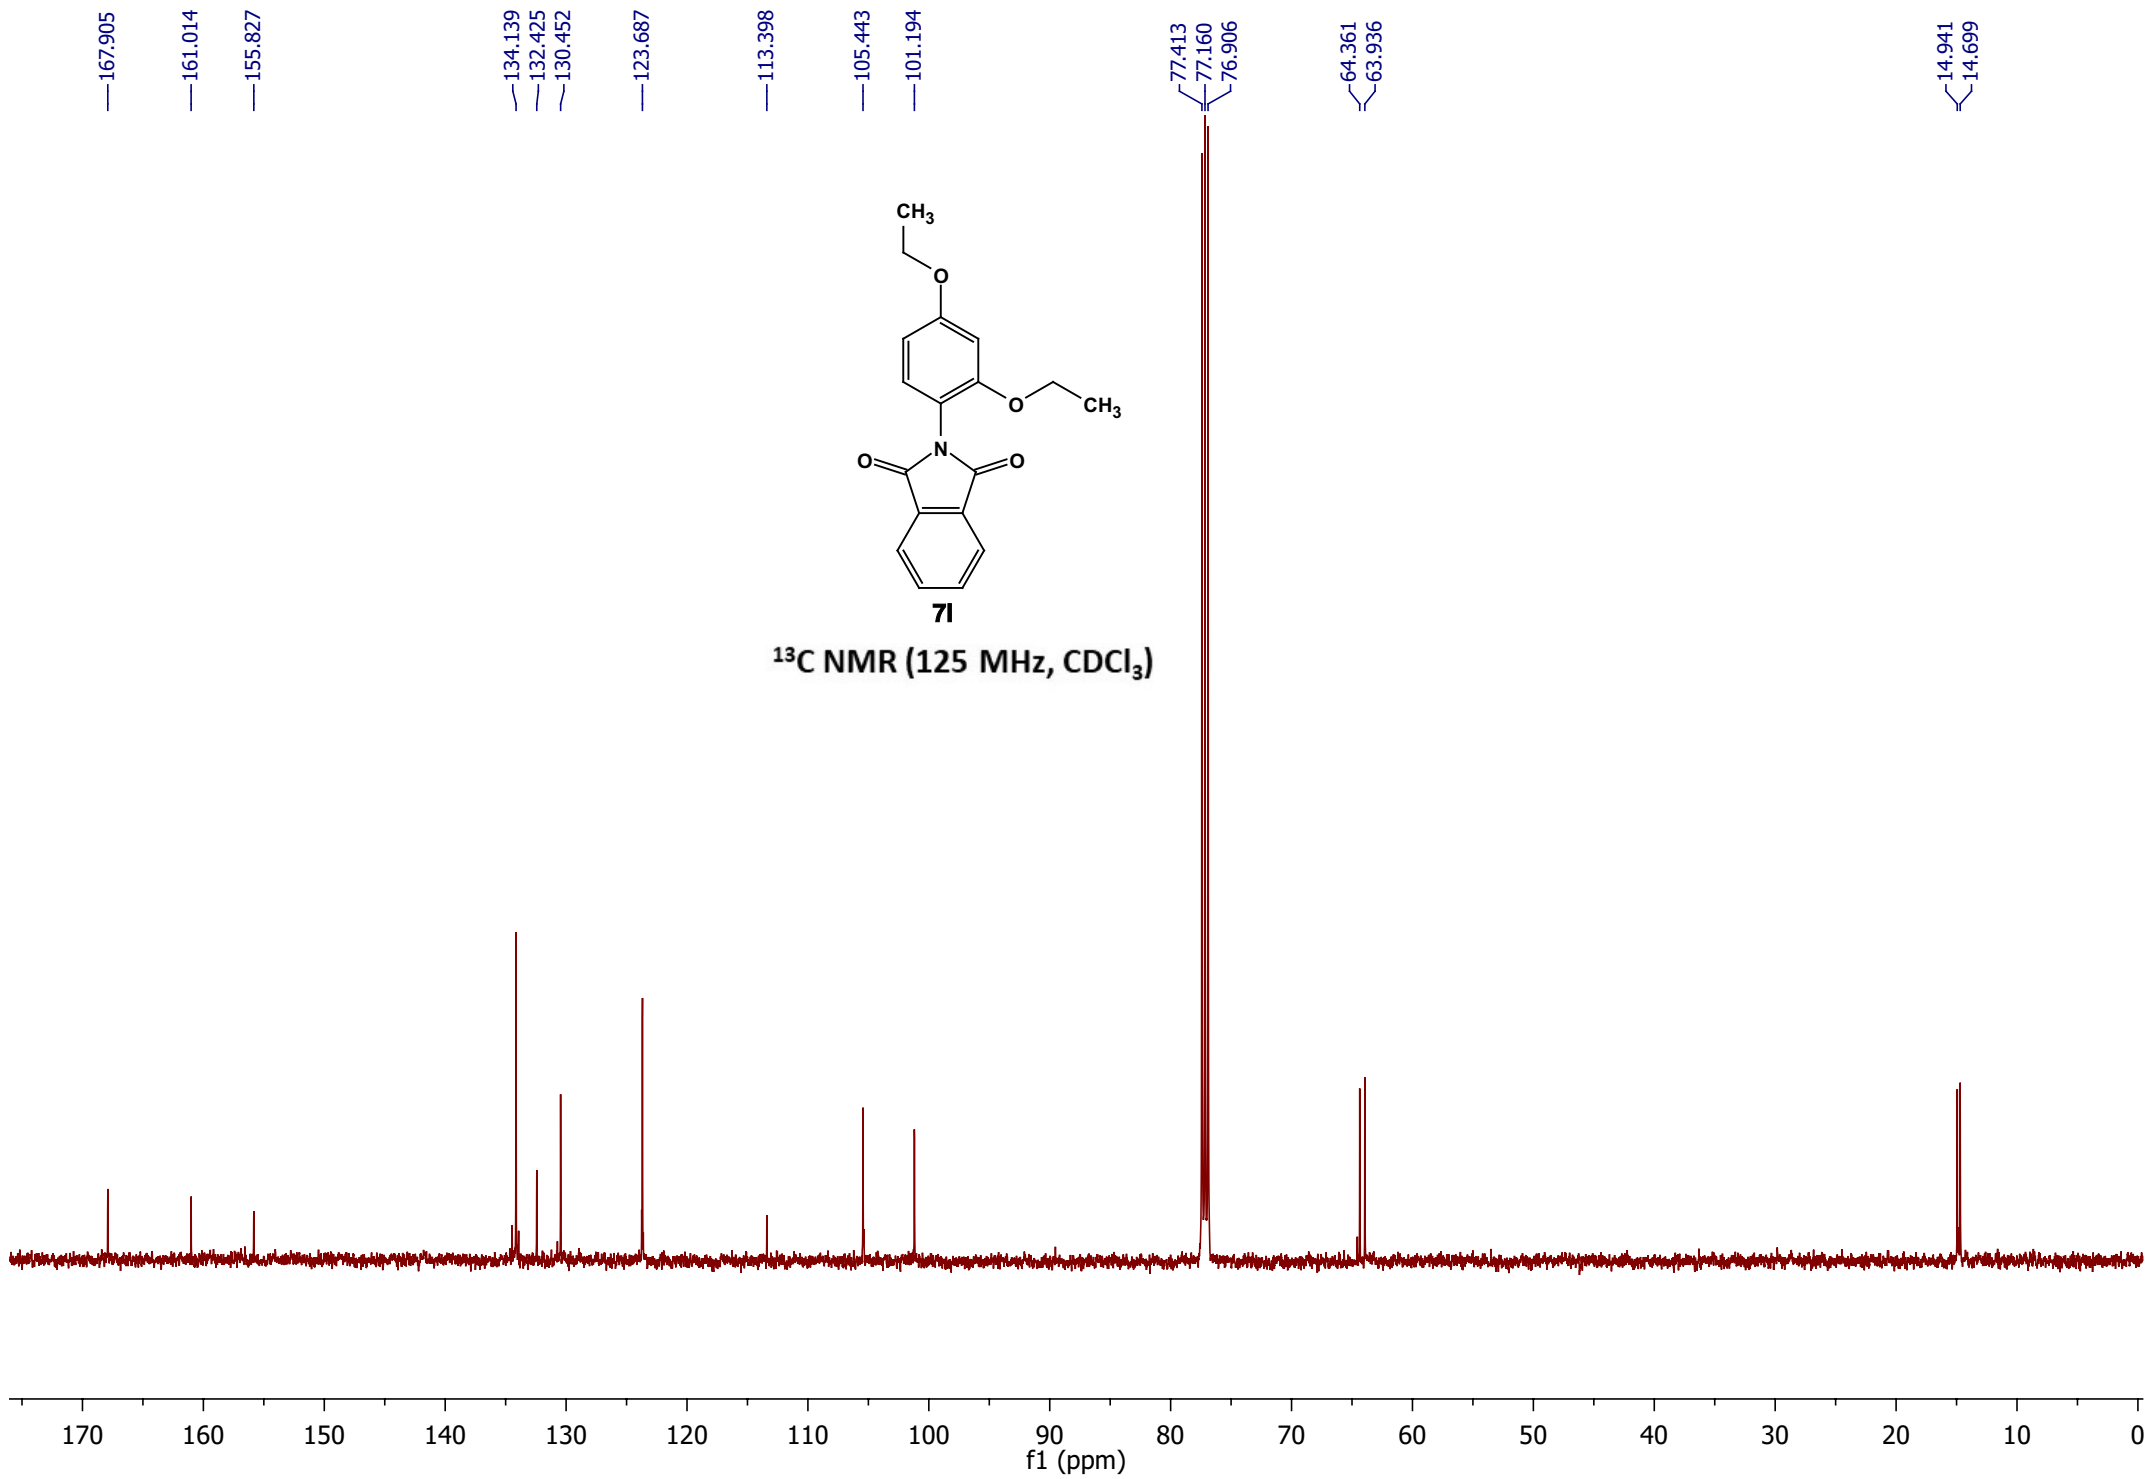

7.943  
7.933  
7.925  
7.917  
7.774  
7.767  
7.757

7.260

6.441  
6.437  
6.404  
6.400

4.060  
4.047  
4.033  
4.018  
4.004  
3.986  
3.972  
3.959  
3.945

2.151

1.430  
1.416  
1.402  
1.207  
1.193  
1.180

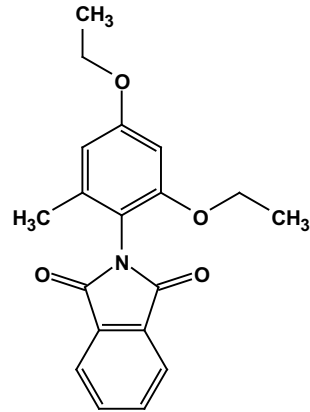

7m

<sup>1</sup>H NMR (500 MHz, CDCl<sub>3</sub>)

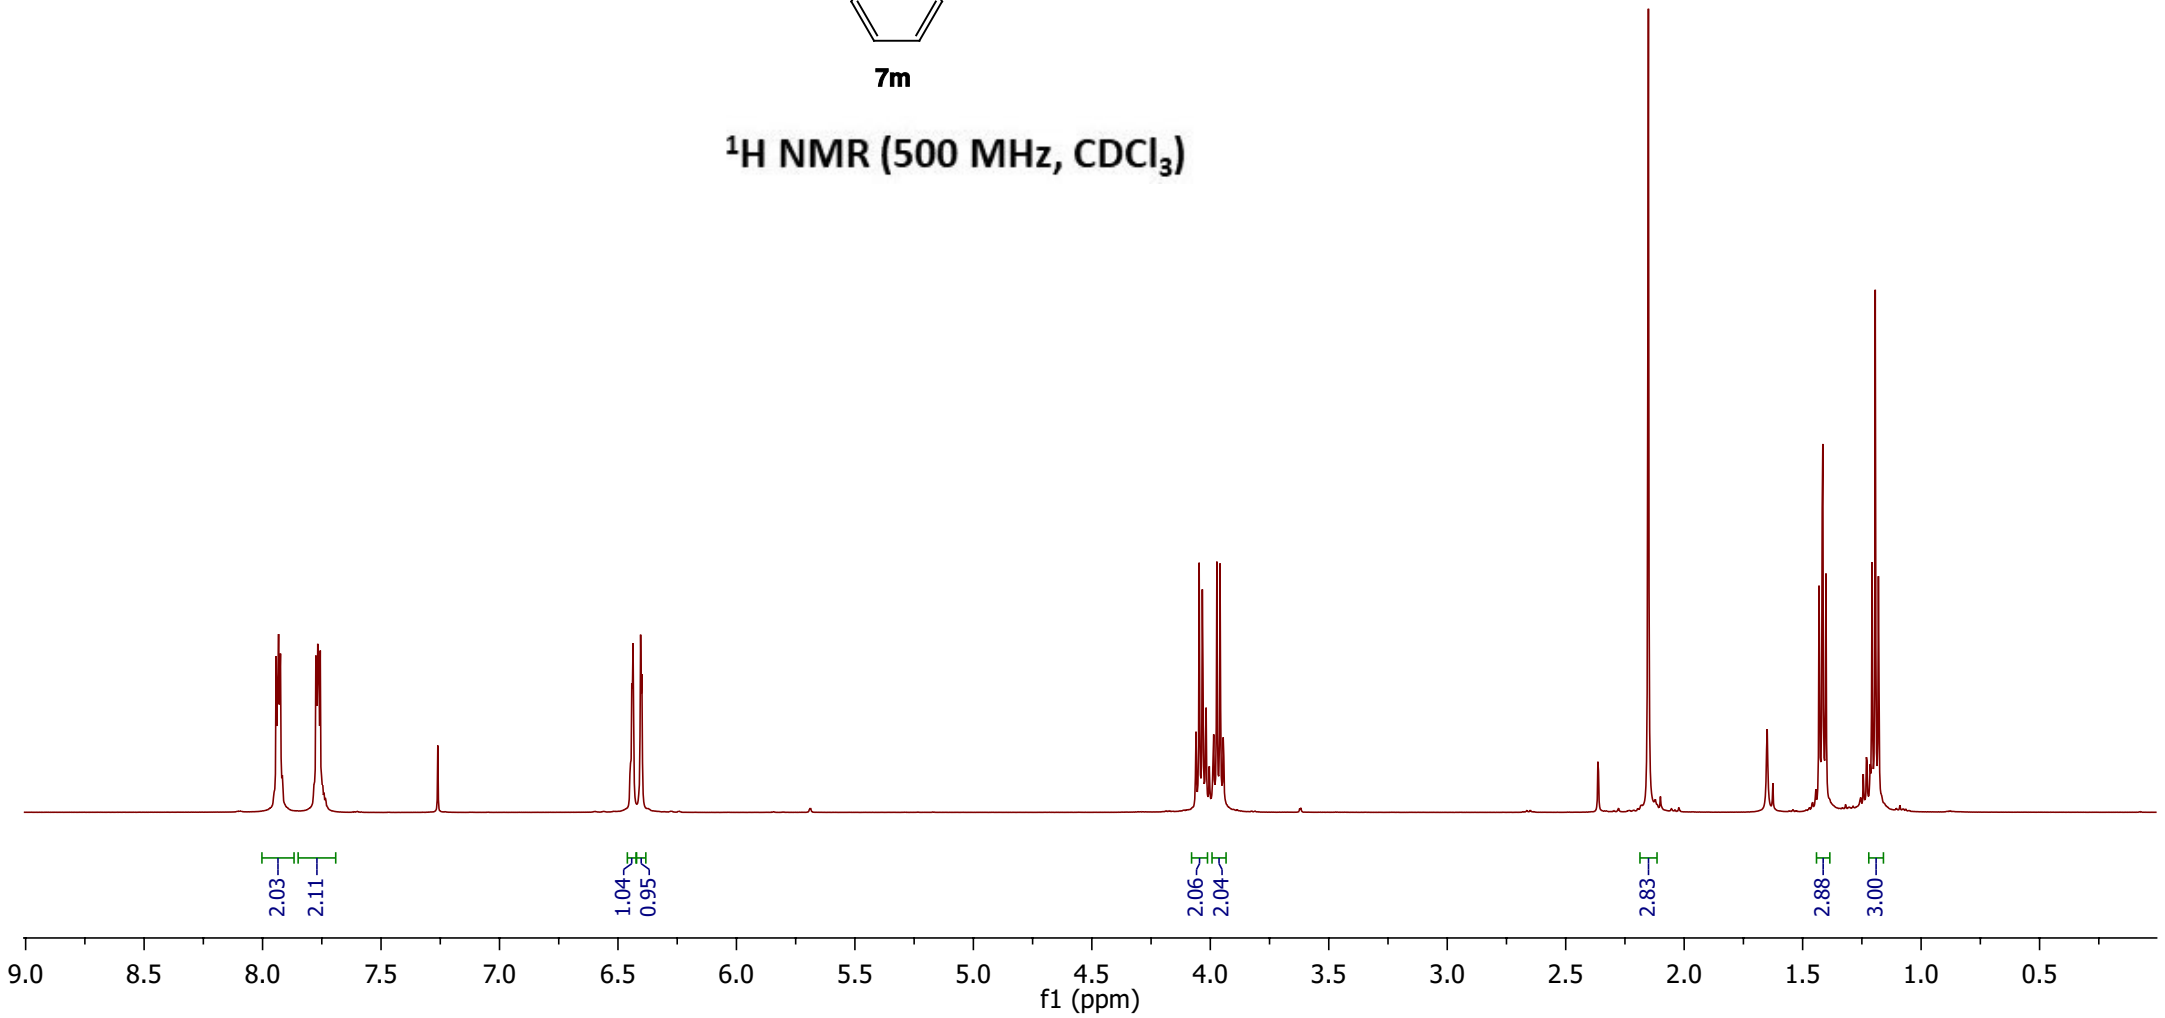

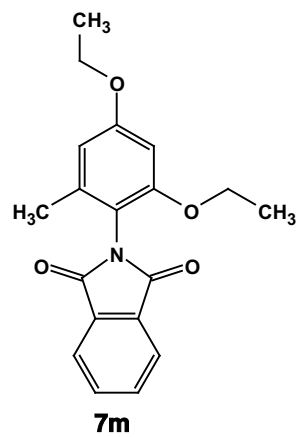

**<sup>13</sup>C NMR (125 MHz, CDCl<sub>3</sub>)**

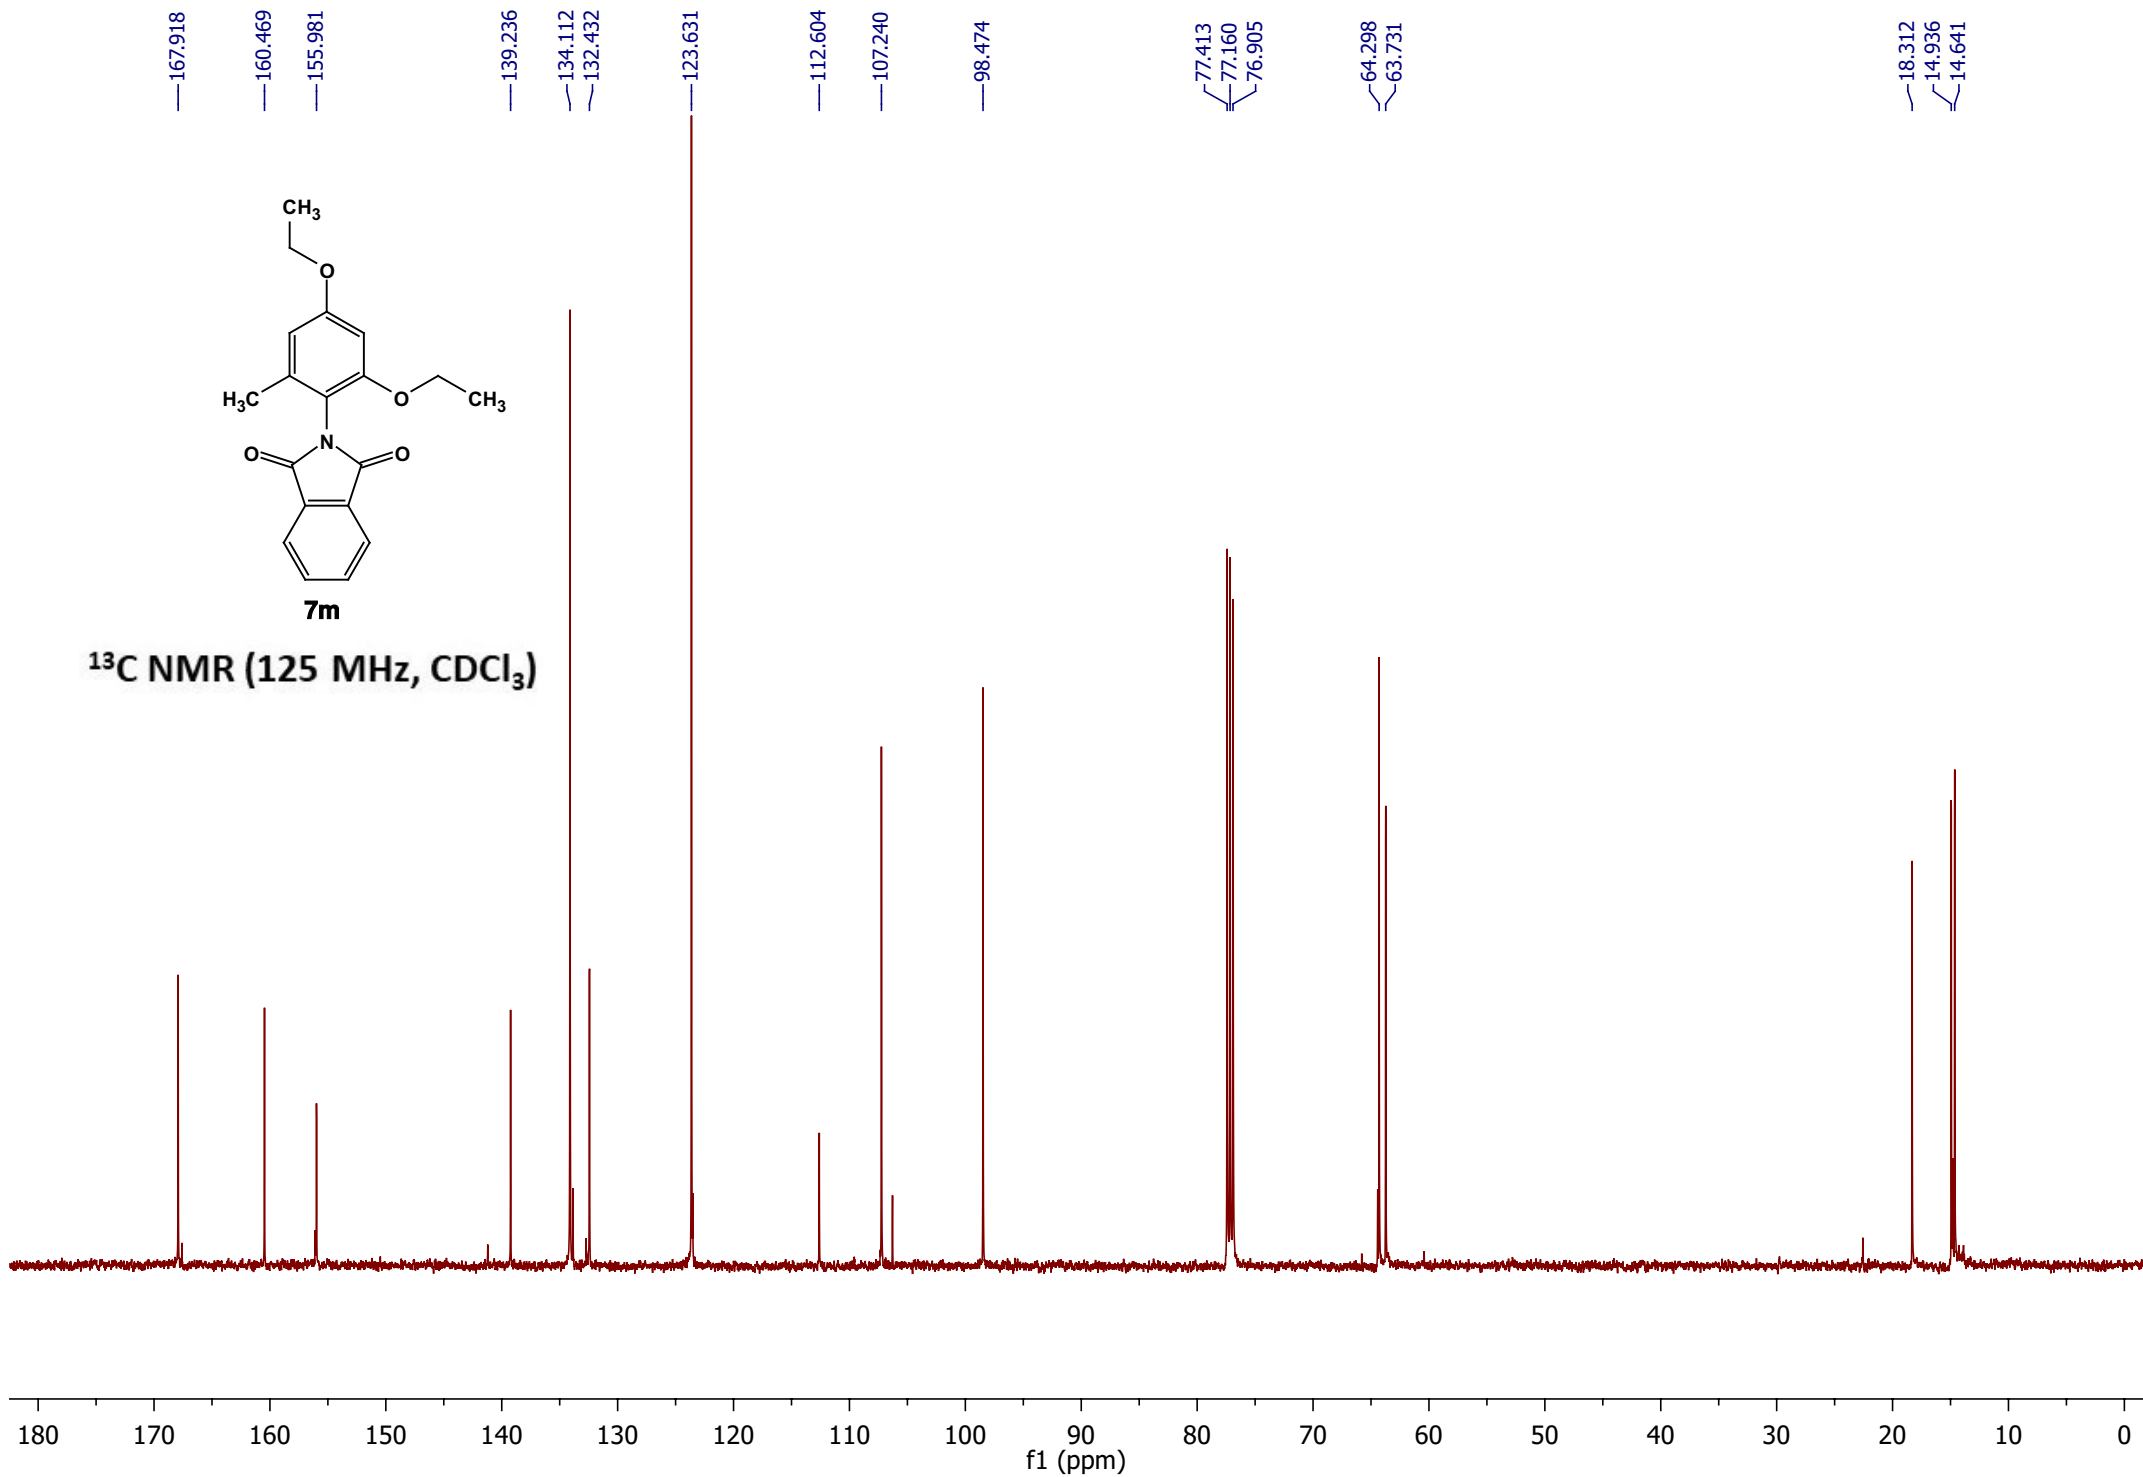



7.934  
7.926  
7.916  
7.769  
7.760  
7.751  
7.260  
7.216

6.575

4.454

3.895  
3.805

3.383

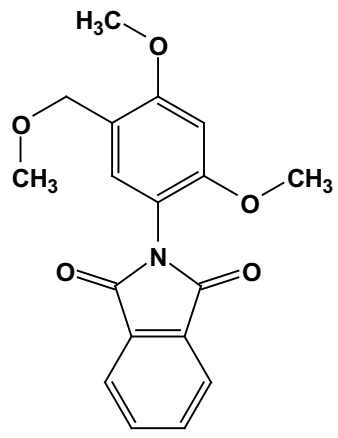

7n

<sup>1</sup>H NMR (500 MHz, CDCl<sub>3</sub>)

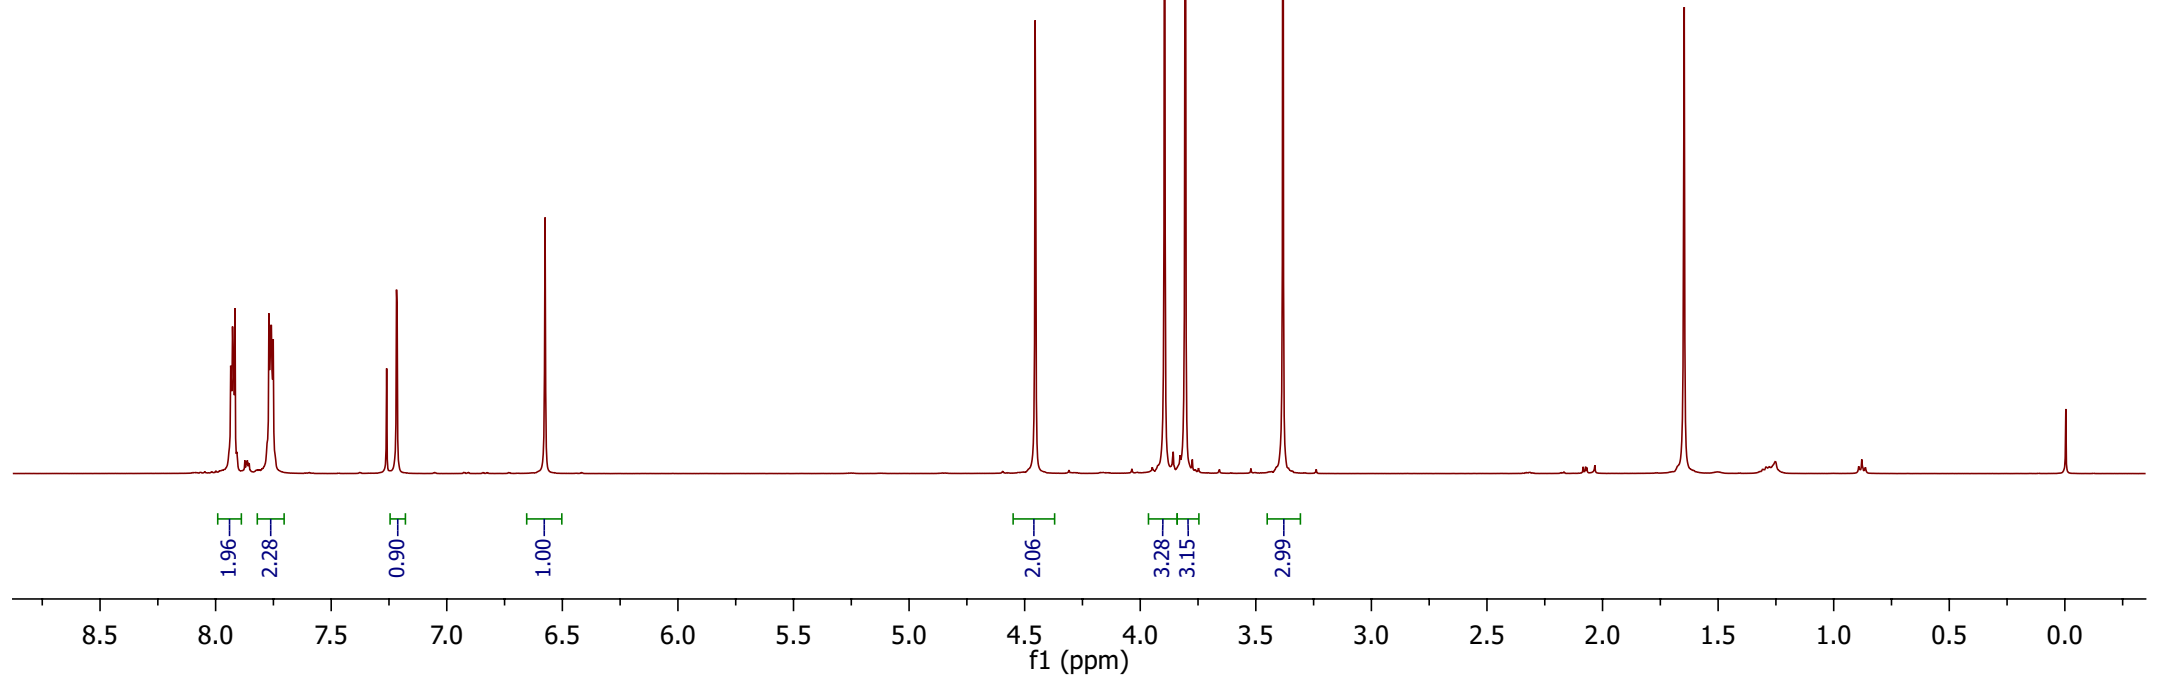

—167.843

—159.146

—156.153

—134.178

—132.409

—130.510

—123.722

—119.200

—112.241

—96.050

—77.414

—77.160

—76.907

—68.980

—58.254

—56.166

—55.941

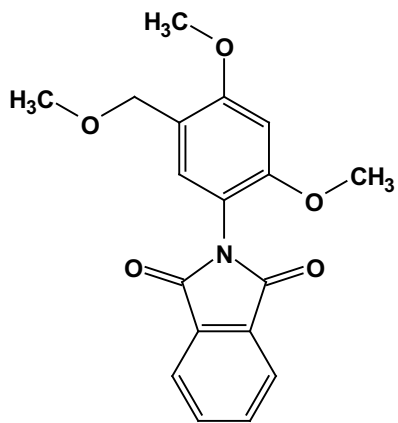

**7n**

**<sup>13</sup>C NMR (125 MHz, CDCl<sub>3</sub>)**

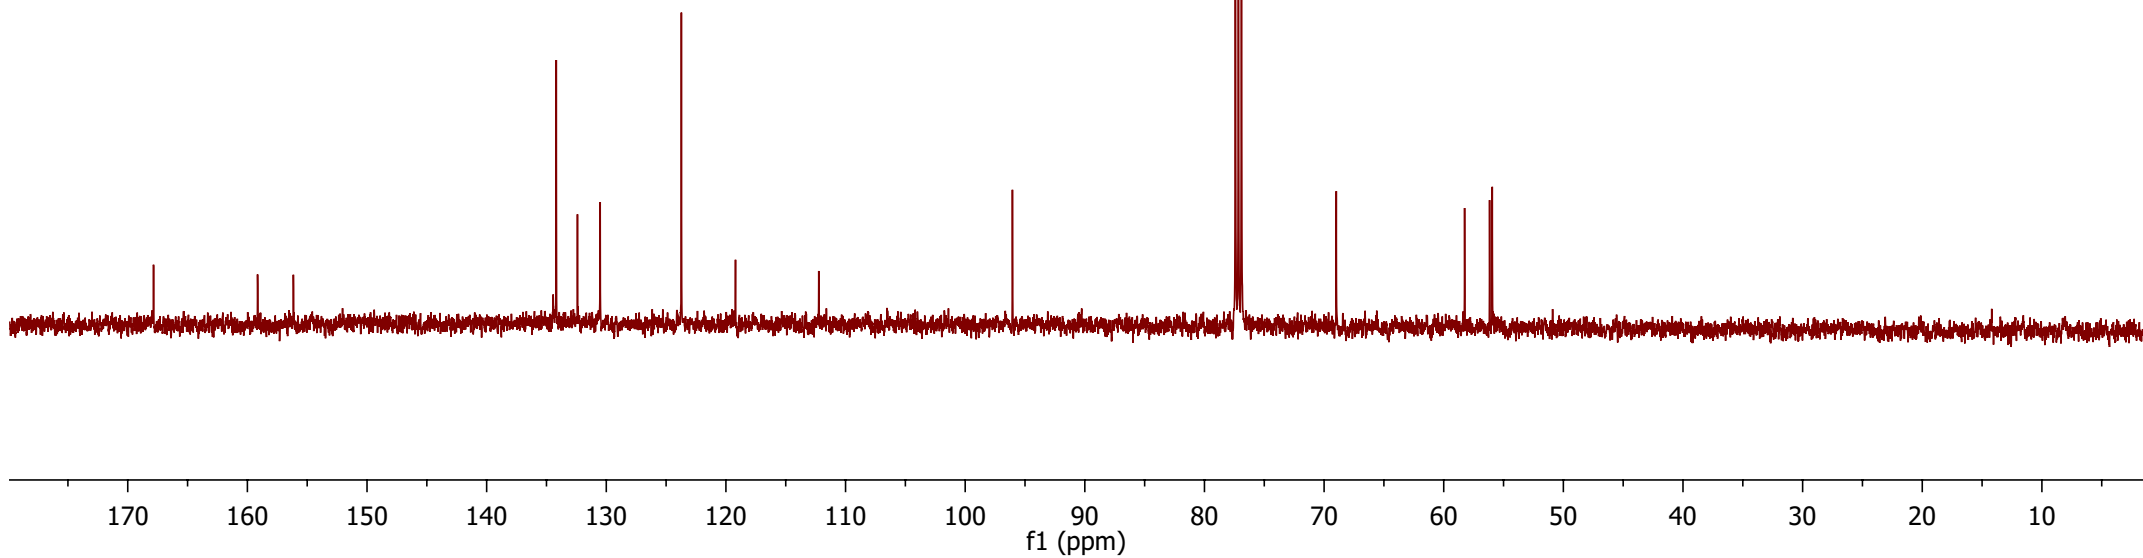

7.943  
7.936  
7.932  
7.926  
7.779  
7.769  
7.761

7.260

6.714  
6.710  
6.501  
6.498

4.377

3.856  
3.732  
3.547  
3.536  
3.523  
3.512  
3.499

1.614

1.046  
1.034

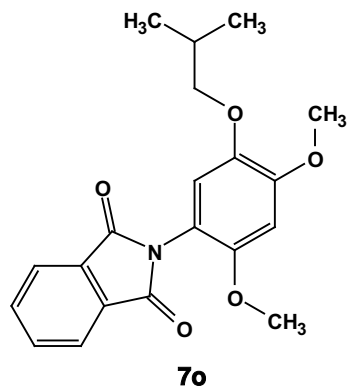

<sup>1</sup>H NMR (500 MHz, CDCl<sub>3</sub>)

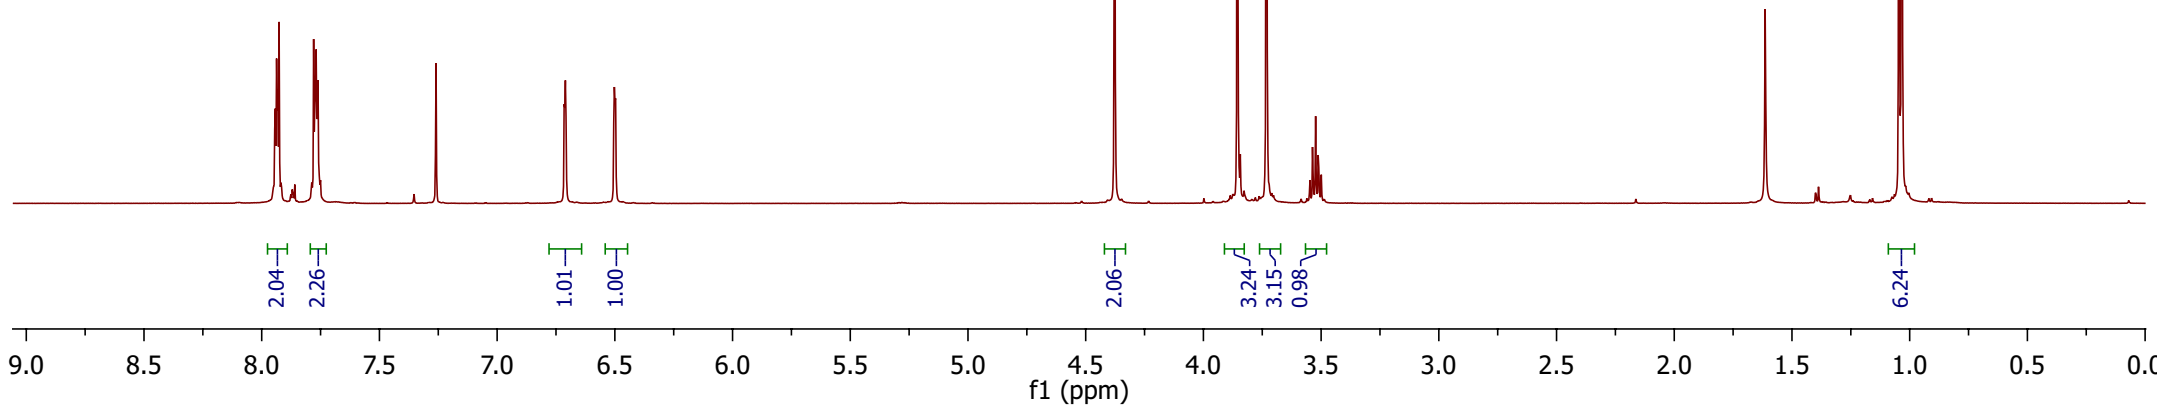

2.04  
2.26

1.01  
1.00

2.06

3.24  
3.15  
0.98

6.24

—167.851

—161.504

—156.835

—140.451

—134.167

—132.530

—123.724

—111.469

—104.753

—98.579

77.414

77.160

76.907

—71.144

—66.639

—56.089

—55.694

—21.984

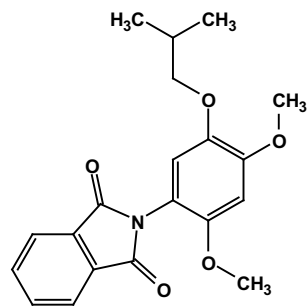

**7o**

<sup>13</sup>C NMR (125 MHz, CDCl<sub>3</sub>)

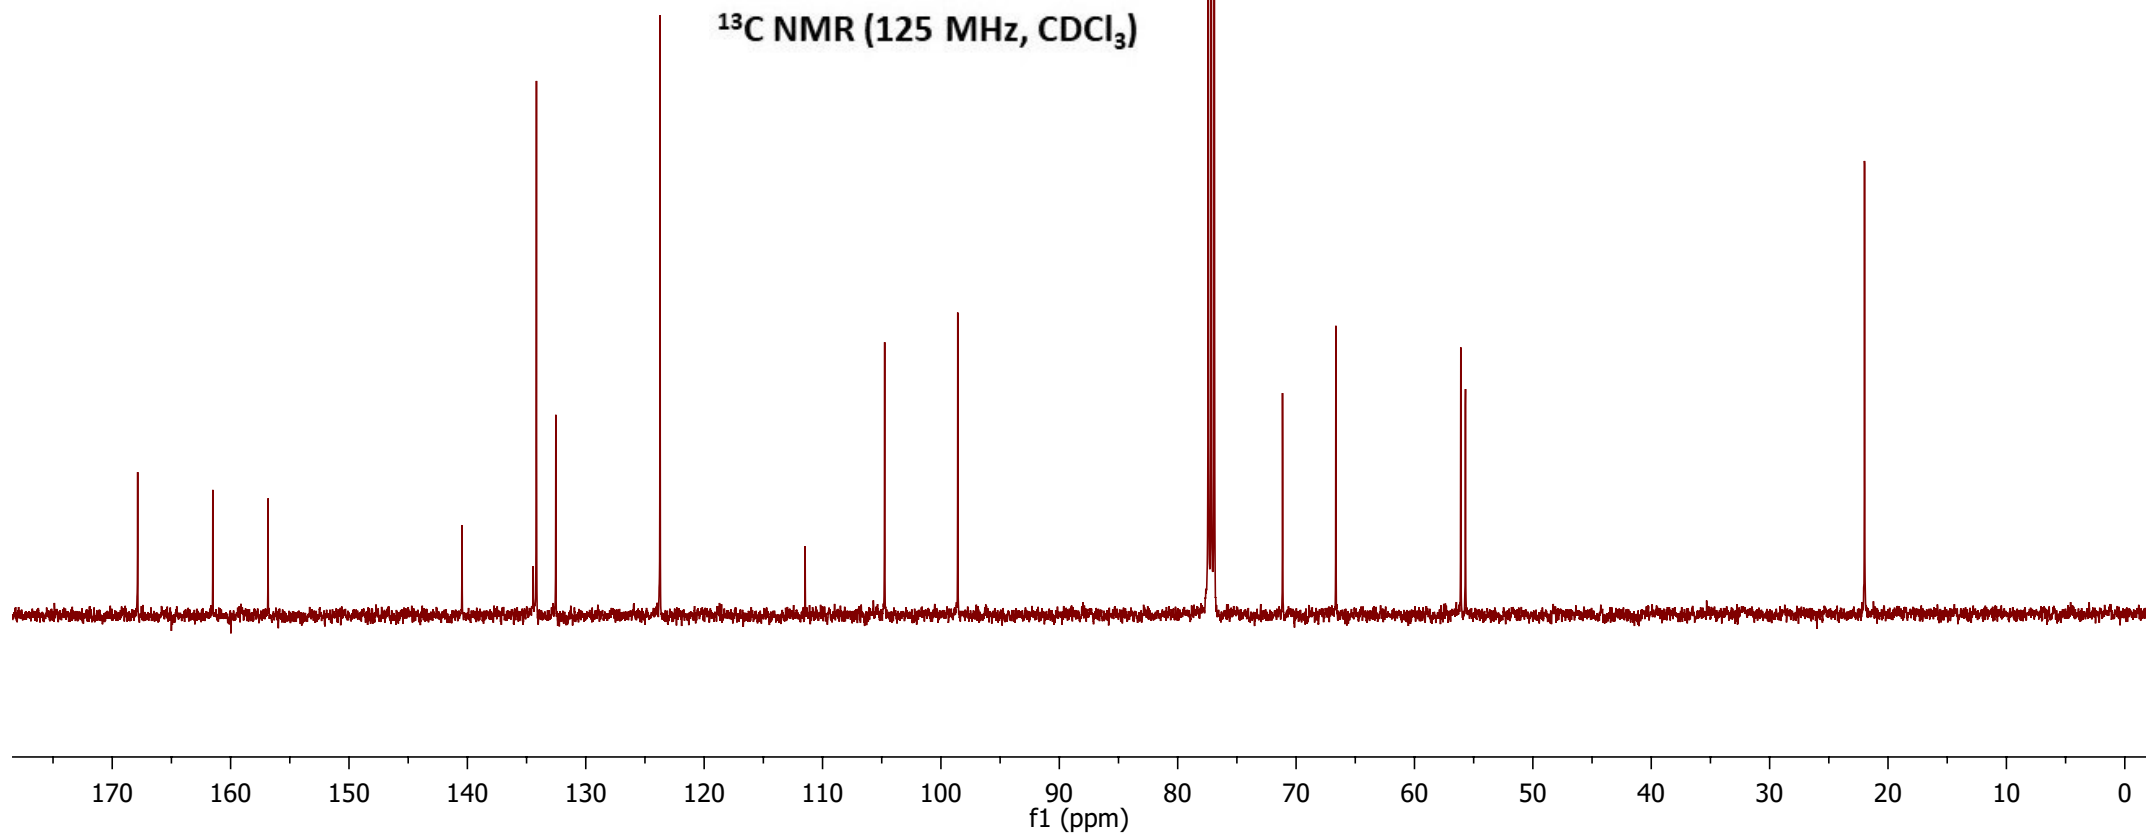

7.937  
7.929  
7.921  
7.767  
7.761  
7.756  
7.751  
7.260  
7.159  
7.143  
7.066  
7.055

6.444

3.844  
3.788

3.178

2.316  
2.151

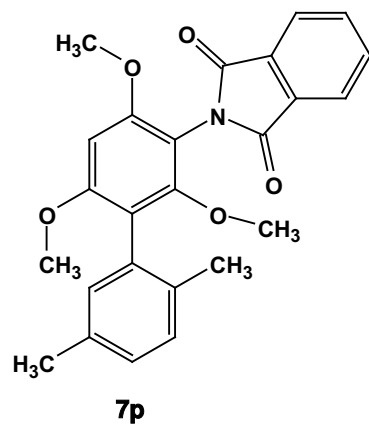

<sup>1</sup>H NMR (500 MHz, CDCl<sub>3</sub>)

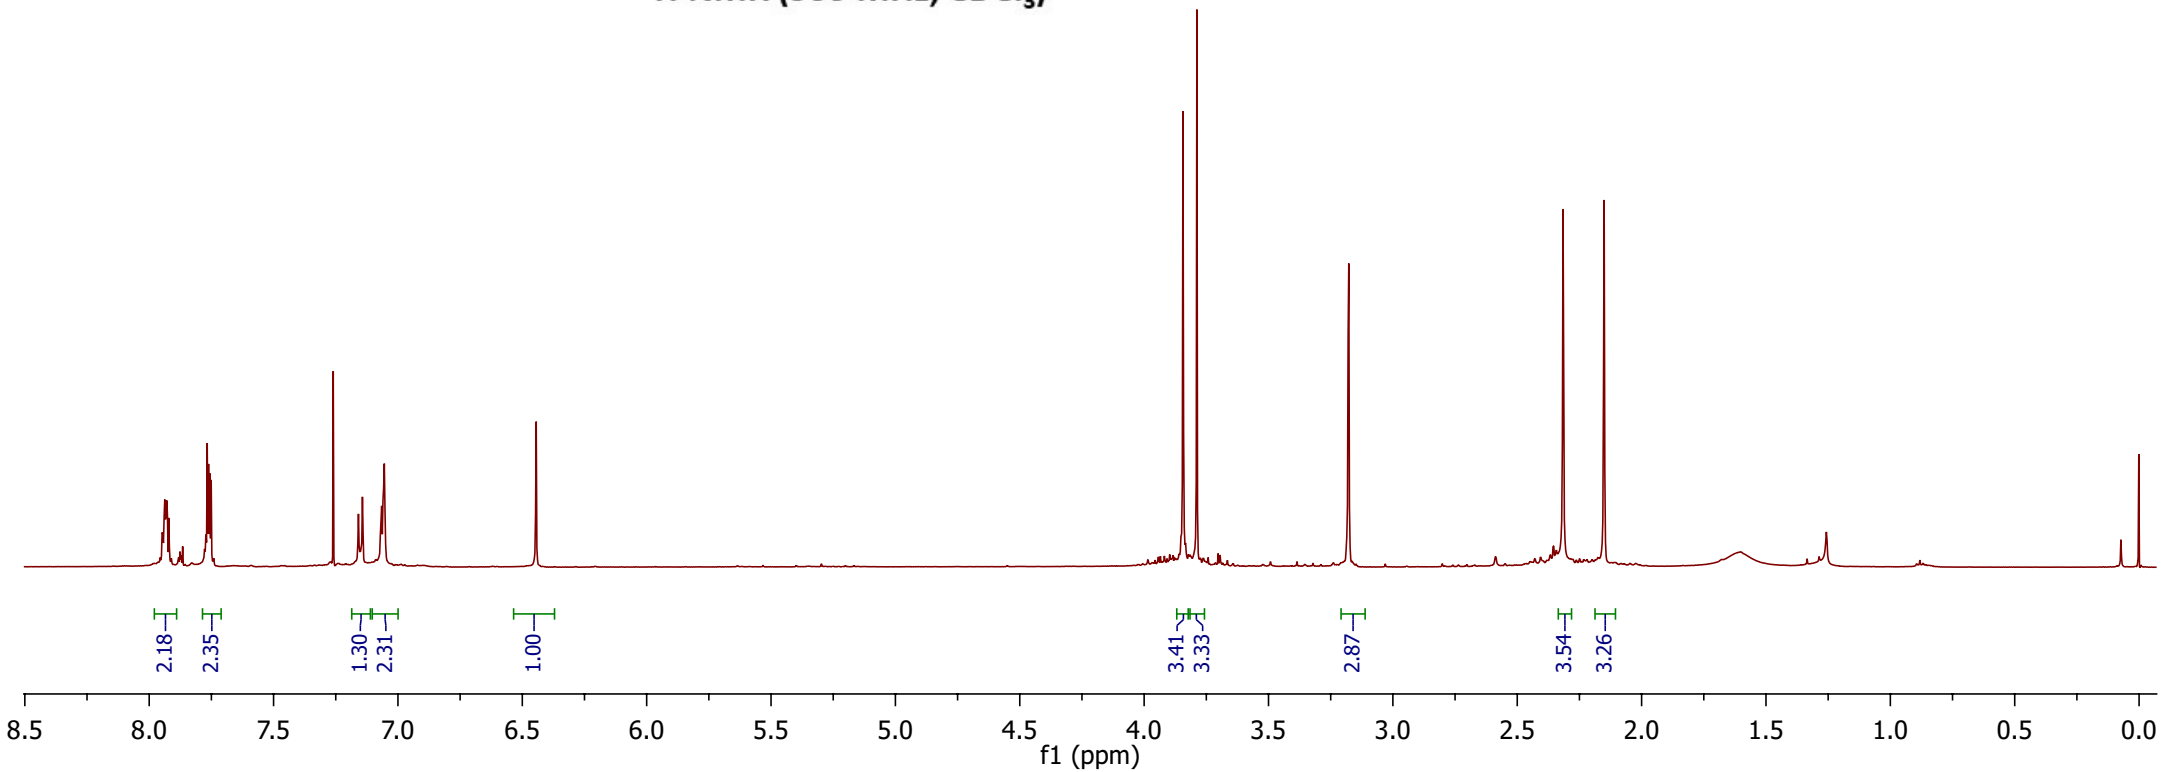

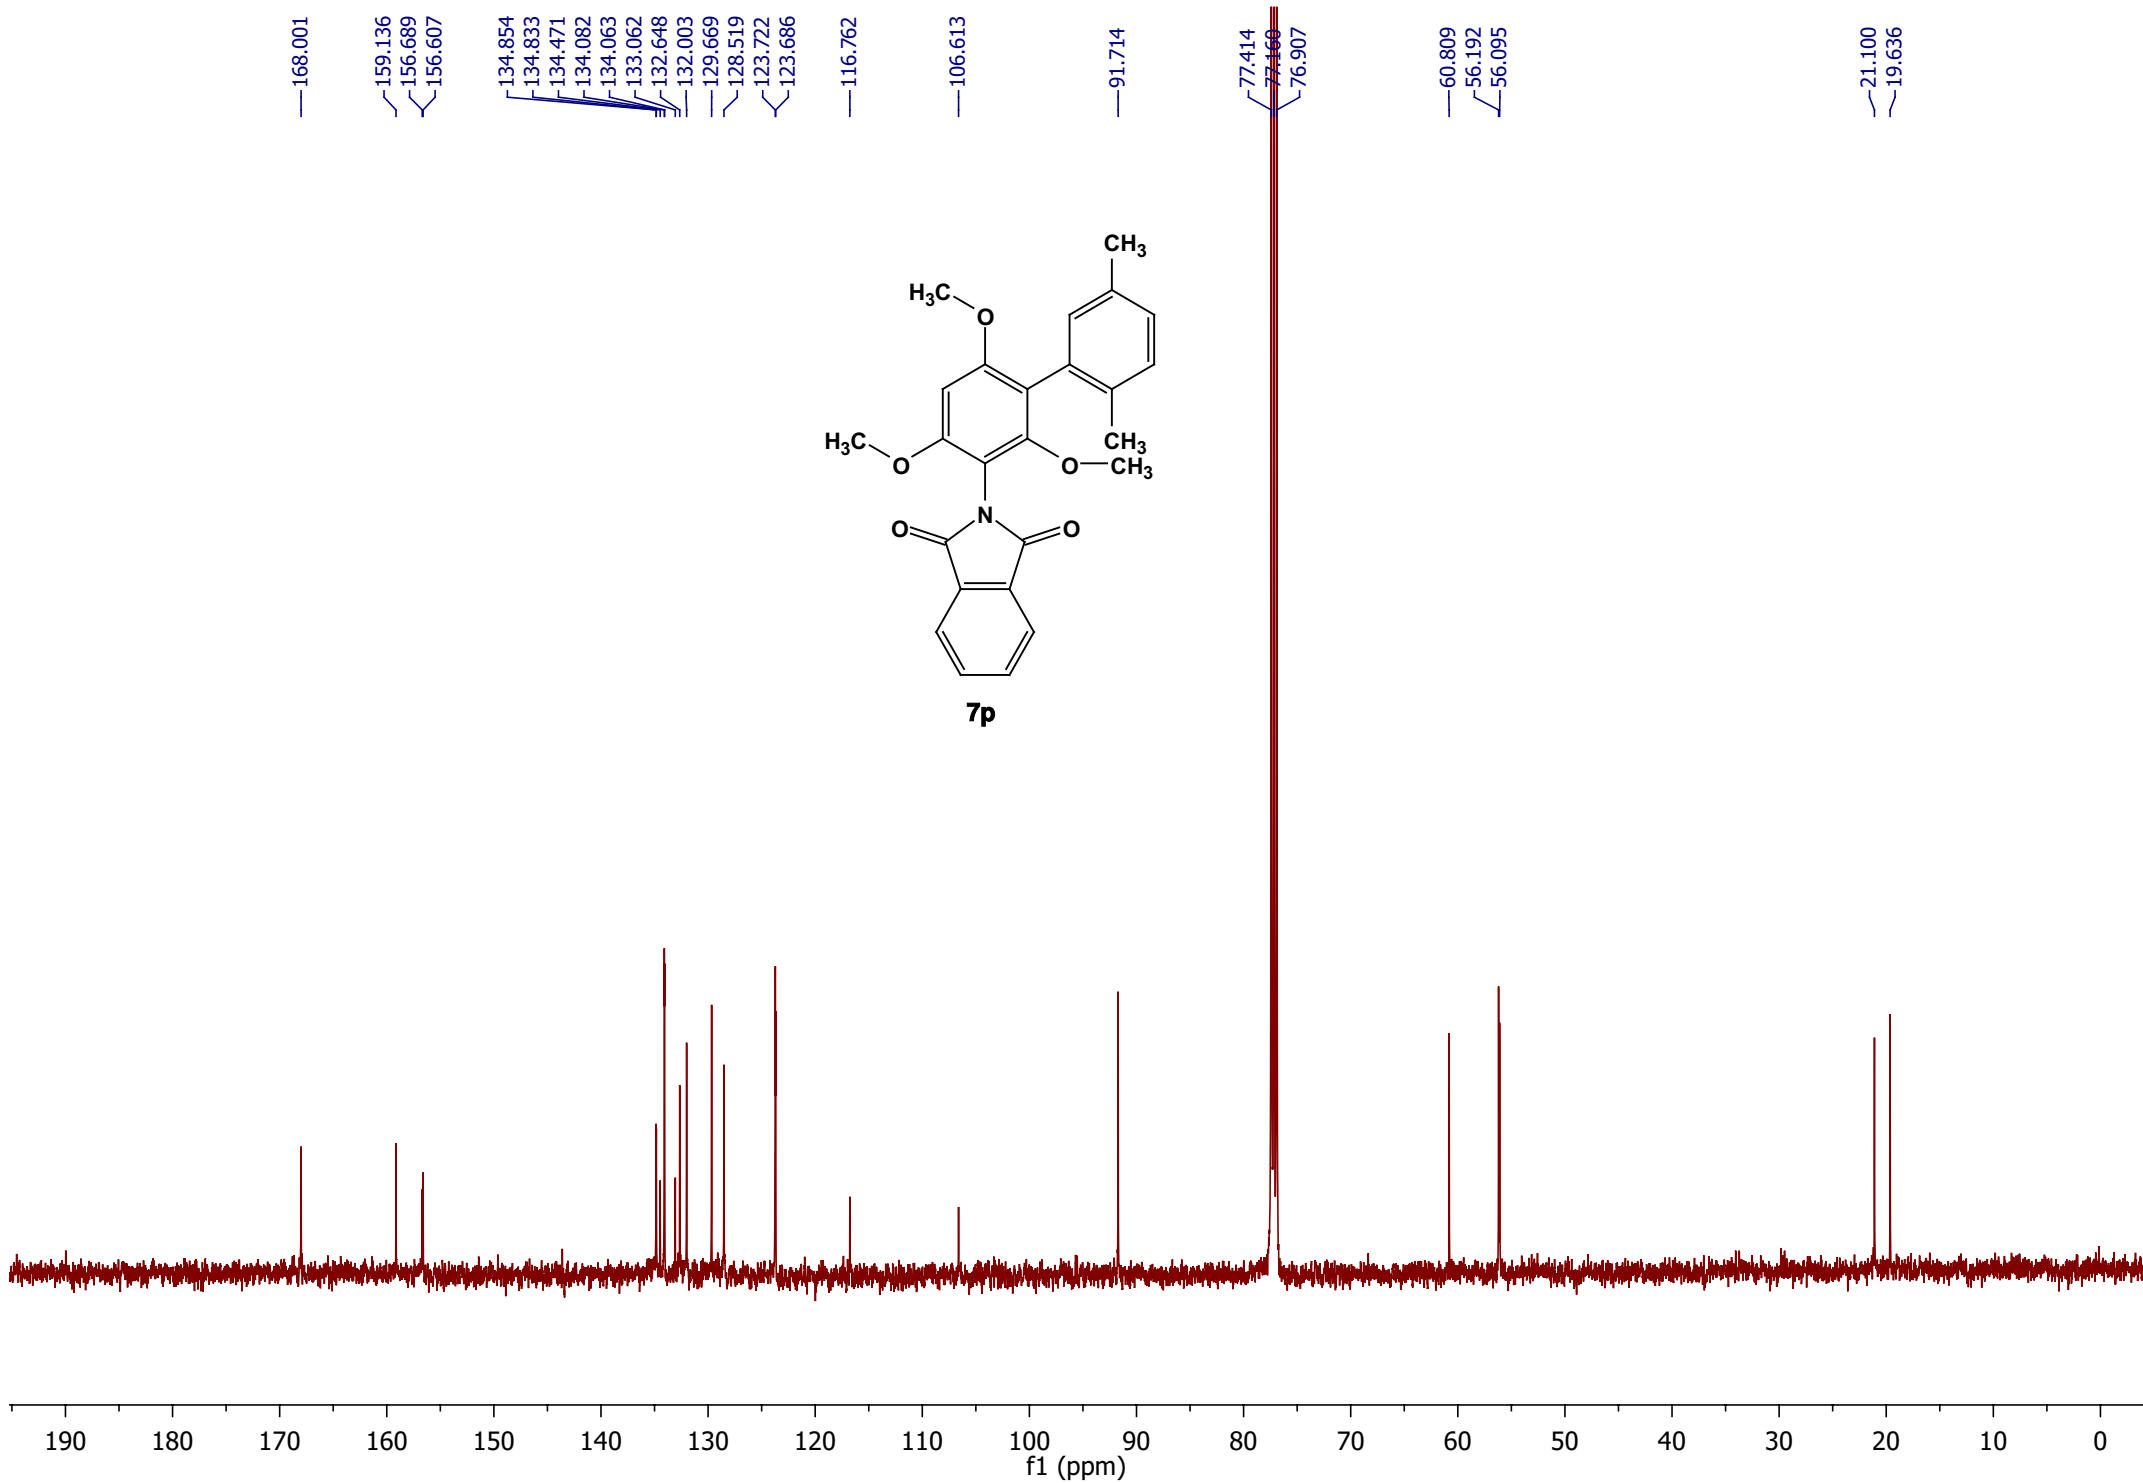

7.942  
7.933  
7.924  
7.782  
7.776  
7.772  
7.766  
7.451  
7.435  
7.260

6.433  
6.417

3.953  
3.915

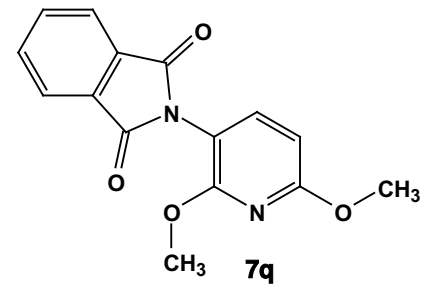

<sup>1</sup>H NMR (500 MHz, CDCl<sub>3</sub>)

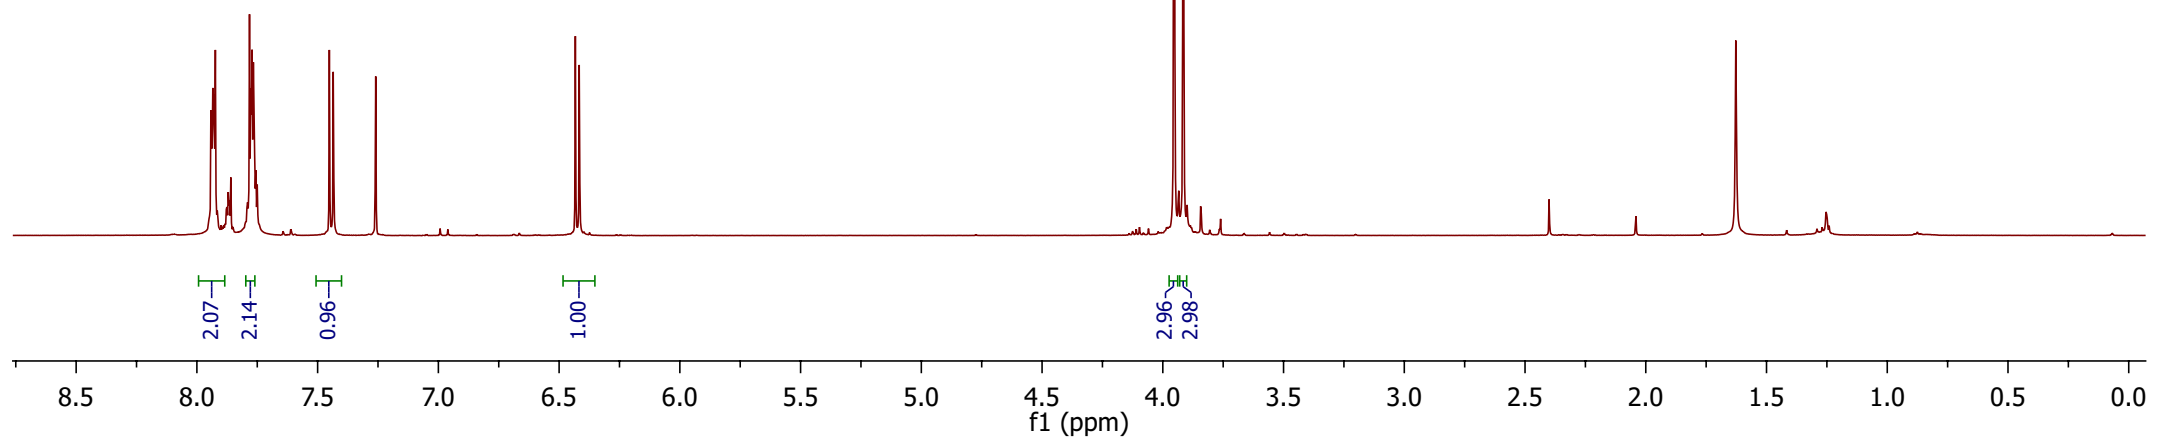

—167.506  
—163.432  
—158.599

—141.045  
—134.338  
—132.290

—123.834

—106.578  
—101.822

77.413  
77.160  
76.906

54.014  
53.946

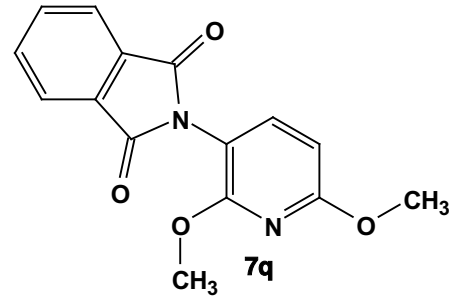

<sup>13</sup>C NMR (125 MHz, CDCl<sub>3</sub>)

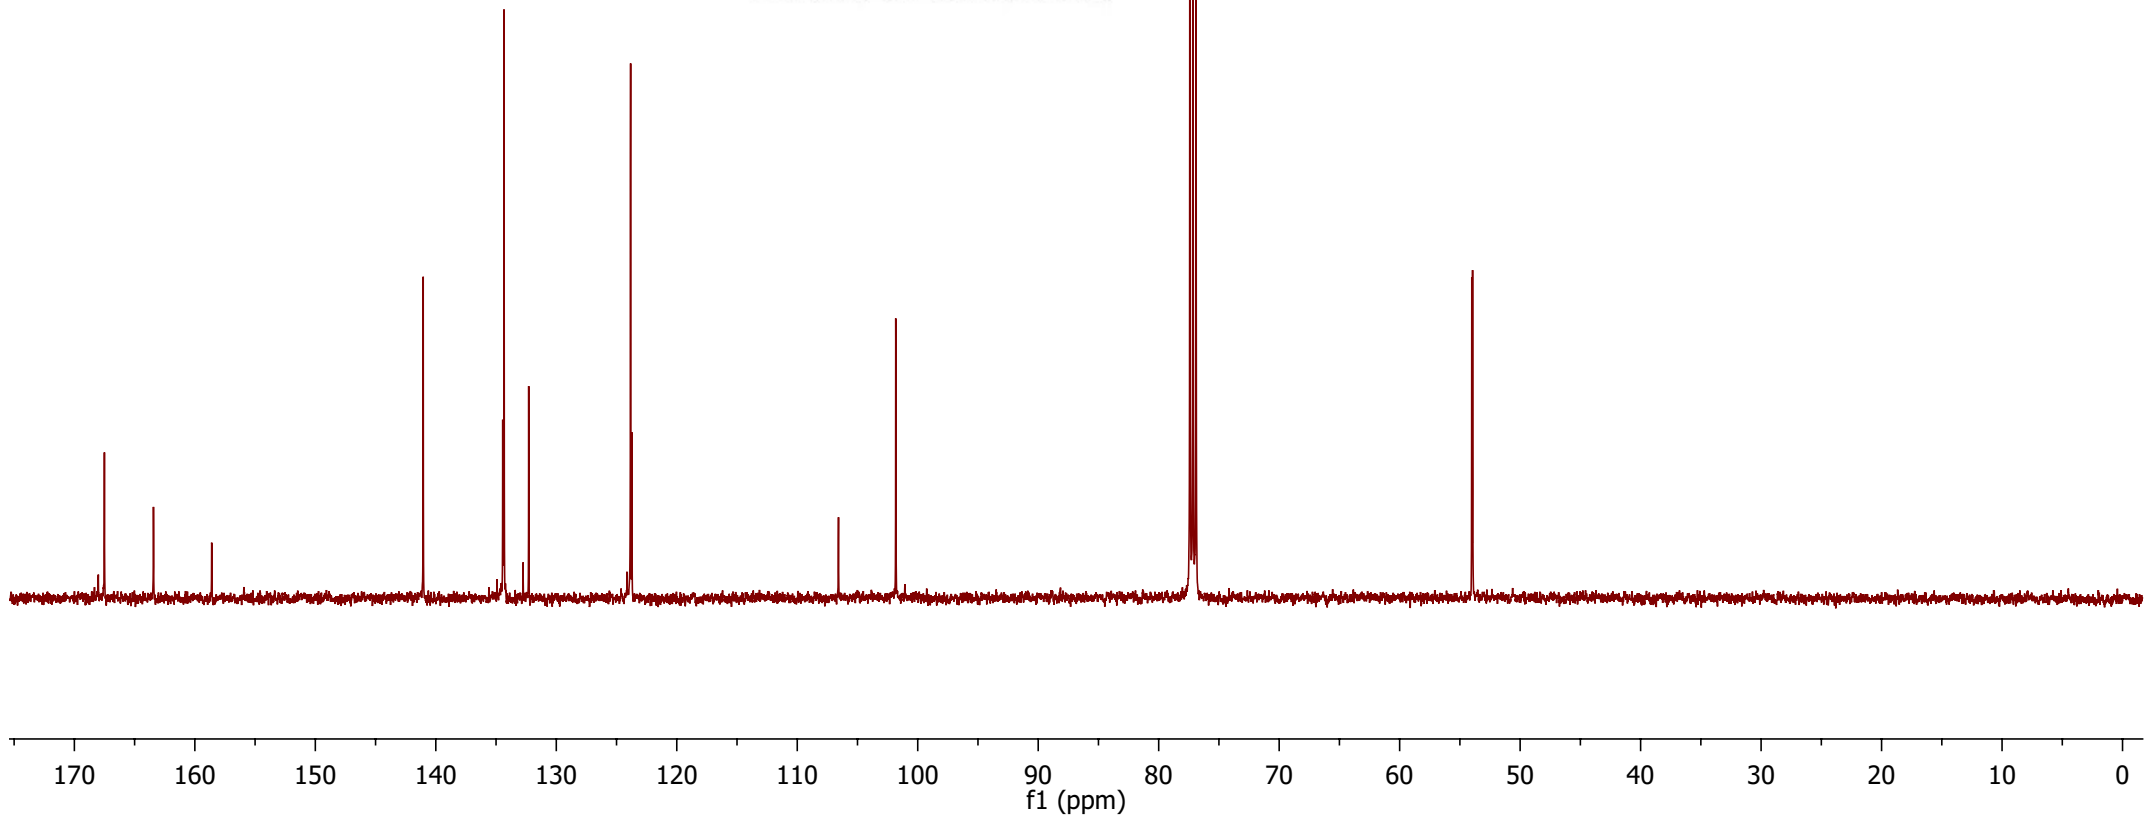



7.958  
7.953  
7.949  
7.944  
7.937  
7.793  
7.788  
7.784  
7.779  
7.553  
7.539  
7.410  
7.397  
7.384  
7.321  
7.309  
7.296  
7.260

4.012  
3.975

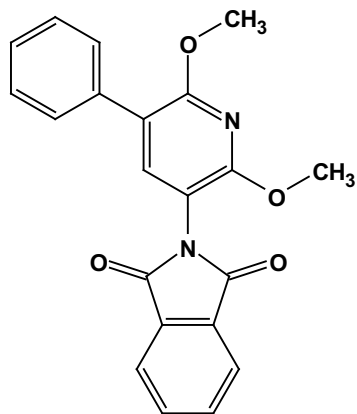

7r

<sup>1</sup>H NMR (600 MHz, CDCl<sub>3</sub>)

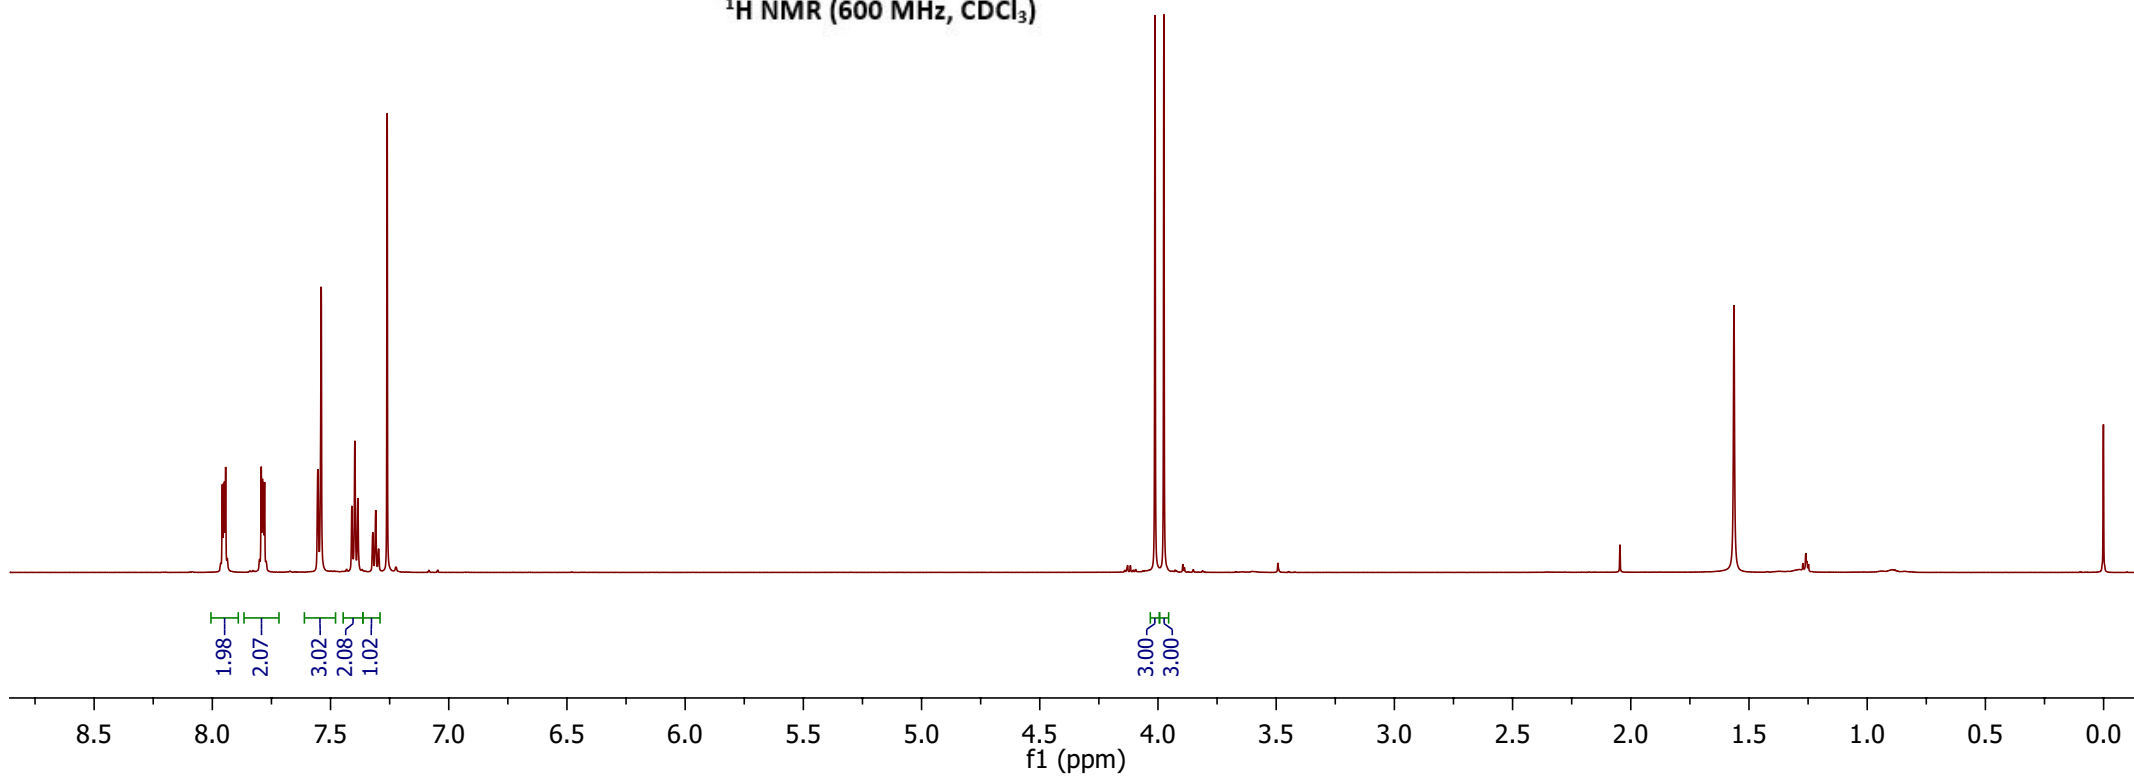

—167.506

—159.693  
—157.550

—141.325

—135.966

—134.374

—132.335

—129.191

—128.373

—127.295

—123.878

—116.605

—106.844

77.371  
77.160  
76.948

—54.143

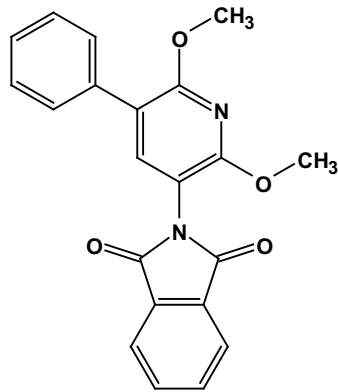

**7r**

<sup>13</sup>C NMR (150 MHz, CDCl<sub>3</sub>)

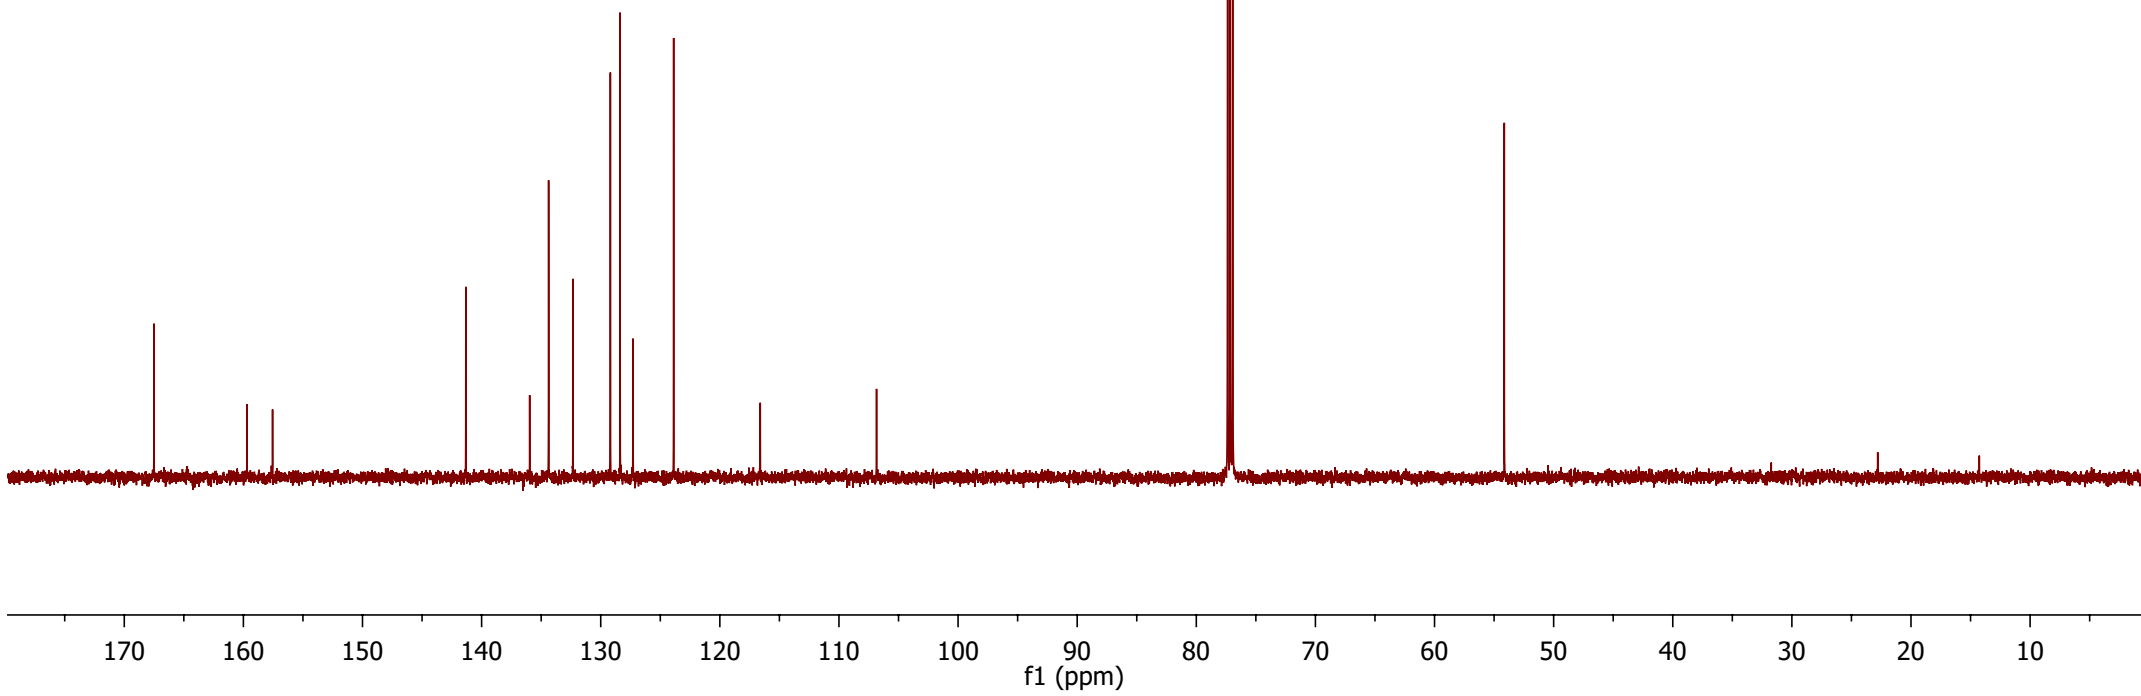

8.020  
8.014  
8.009  
8.004  
7.988  
7.849  
7.841  
7.831  
7.538  
7.521  
7.489  
7.474  
7.459  
7.426  
7.411  
7.396  
7.260

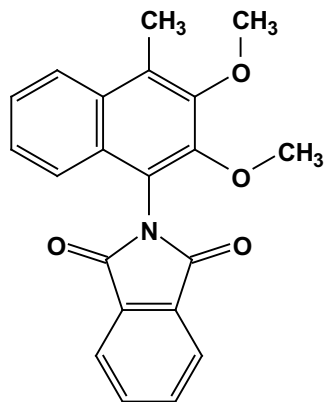

7s

<sup>1</sup>H NMR (500 MHz, CDCl<sub>3</sub>)

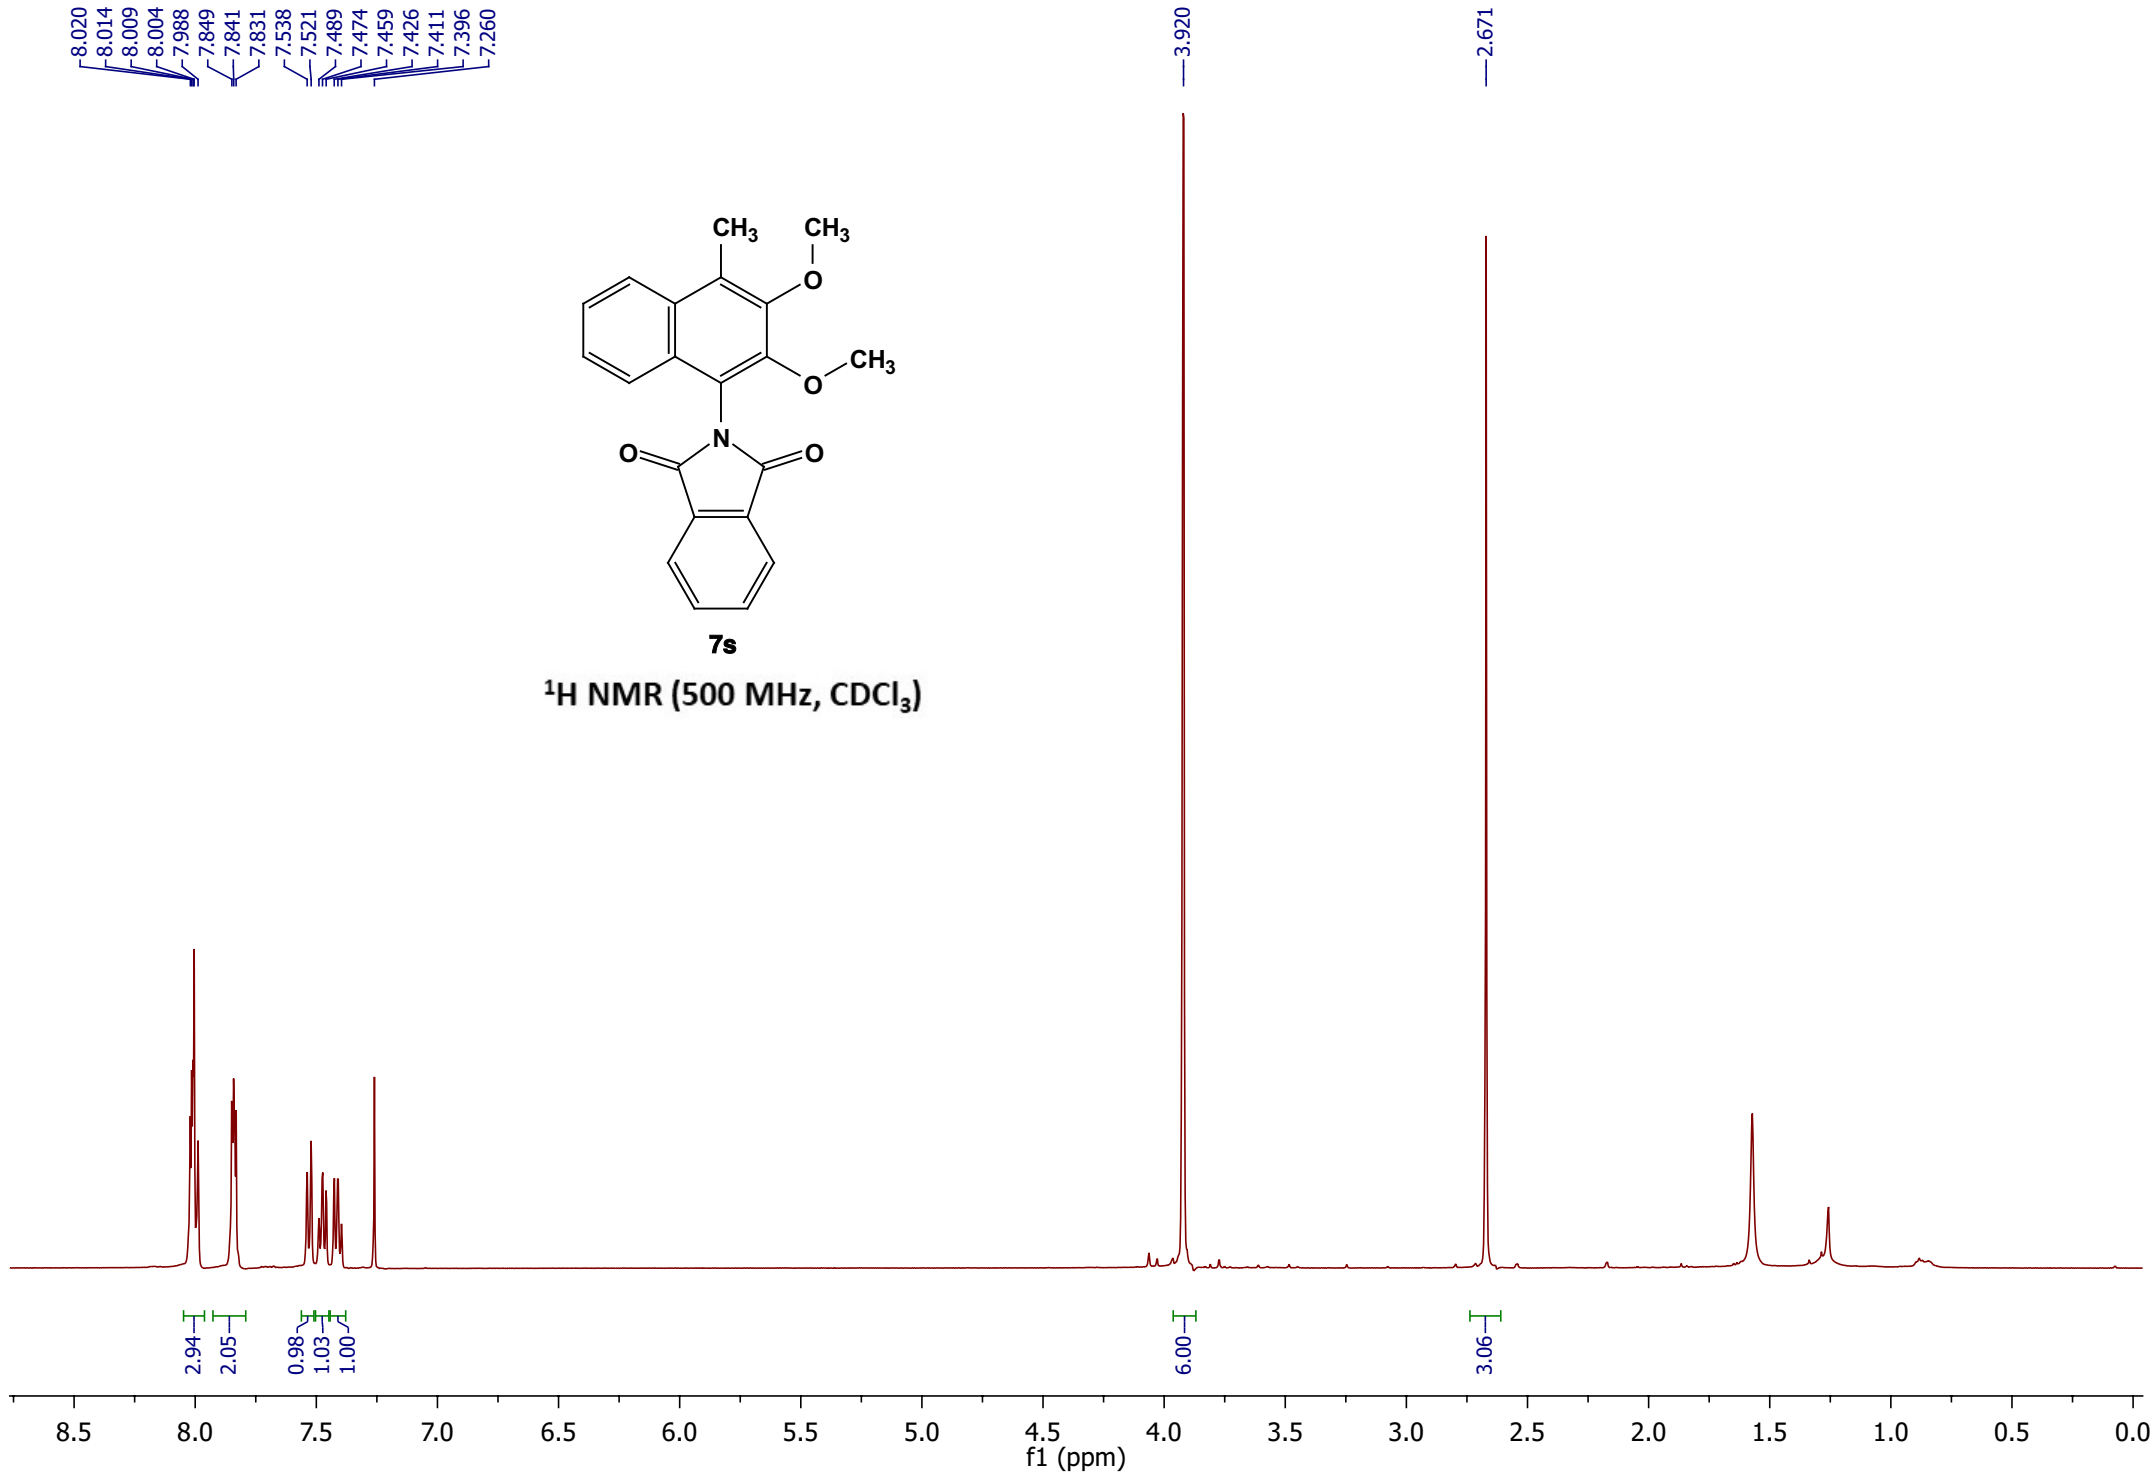

—168.113

149.989  
149.915

134.508  
132.408  
130.523  
129.347  
128.654  
126.358  
125.668  
124.720  
124.038  
122.479  
118.182

77.415  
77.160  
76.907

61.352  
60.991

—11.625

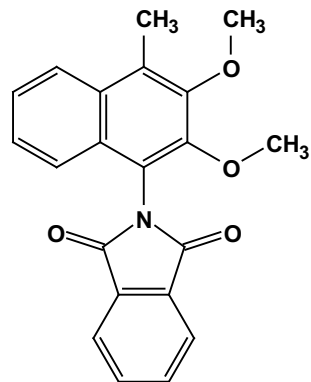

**7s**

<sup>13</sup>C NMR (125 MHz, CDCl<sub>3</sub>)

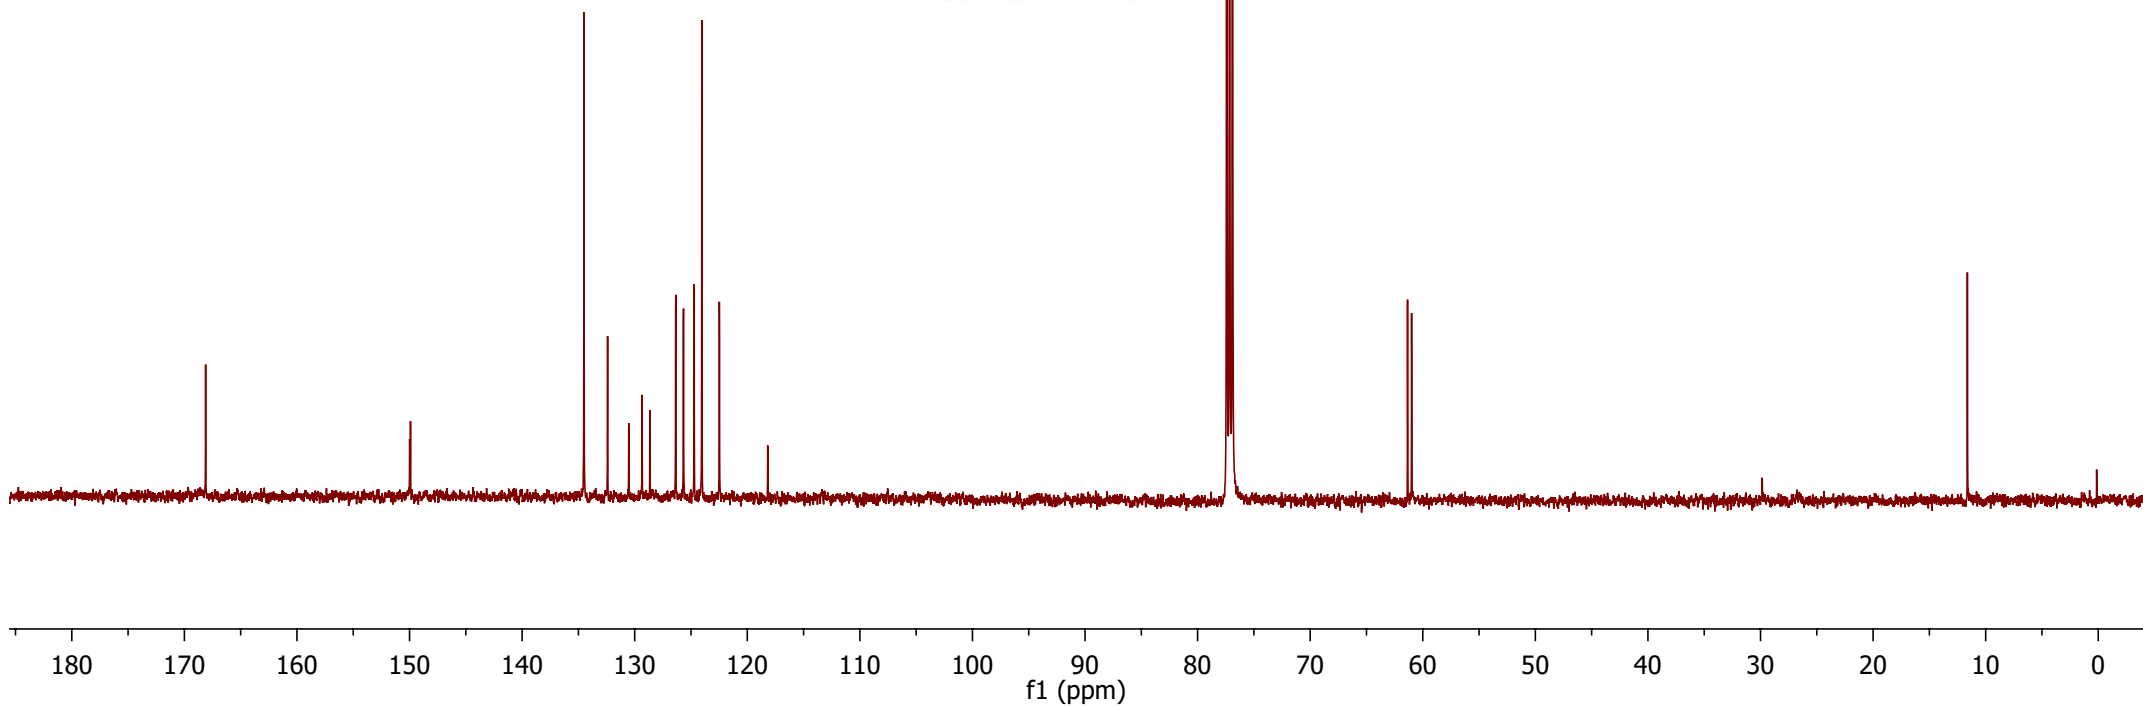

8.020  
8.014  
8.010  
8.004  
7.846  
7.838  
7.829  
7.785  
7.769  
7.486  
7.469  
7.429  
7.414  
7.399  
7.351  
7.335  
7.321  
7.260

4.028  
3.903

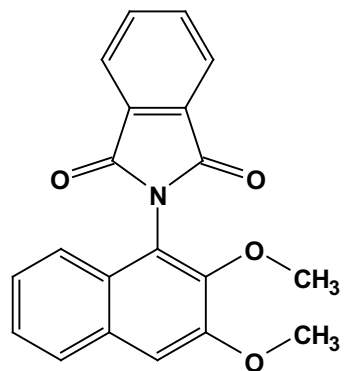

7t

<sup>1</sup>H NMR (500 MHz, CDCl<sub>3</sub>)

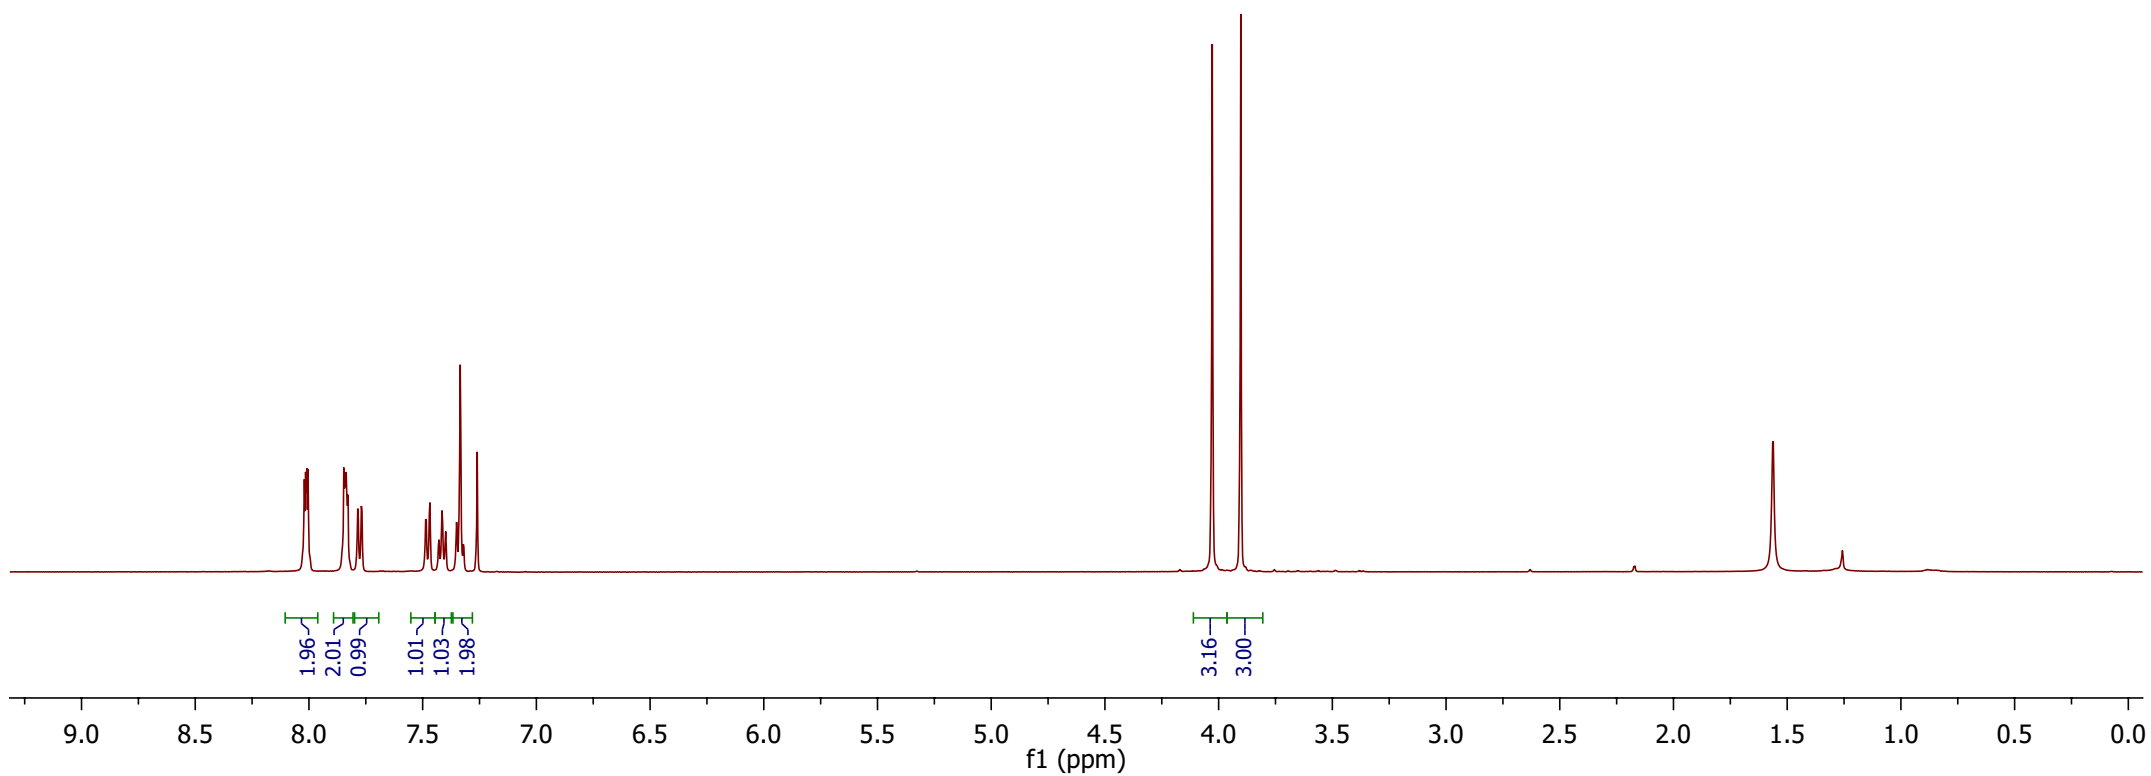

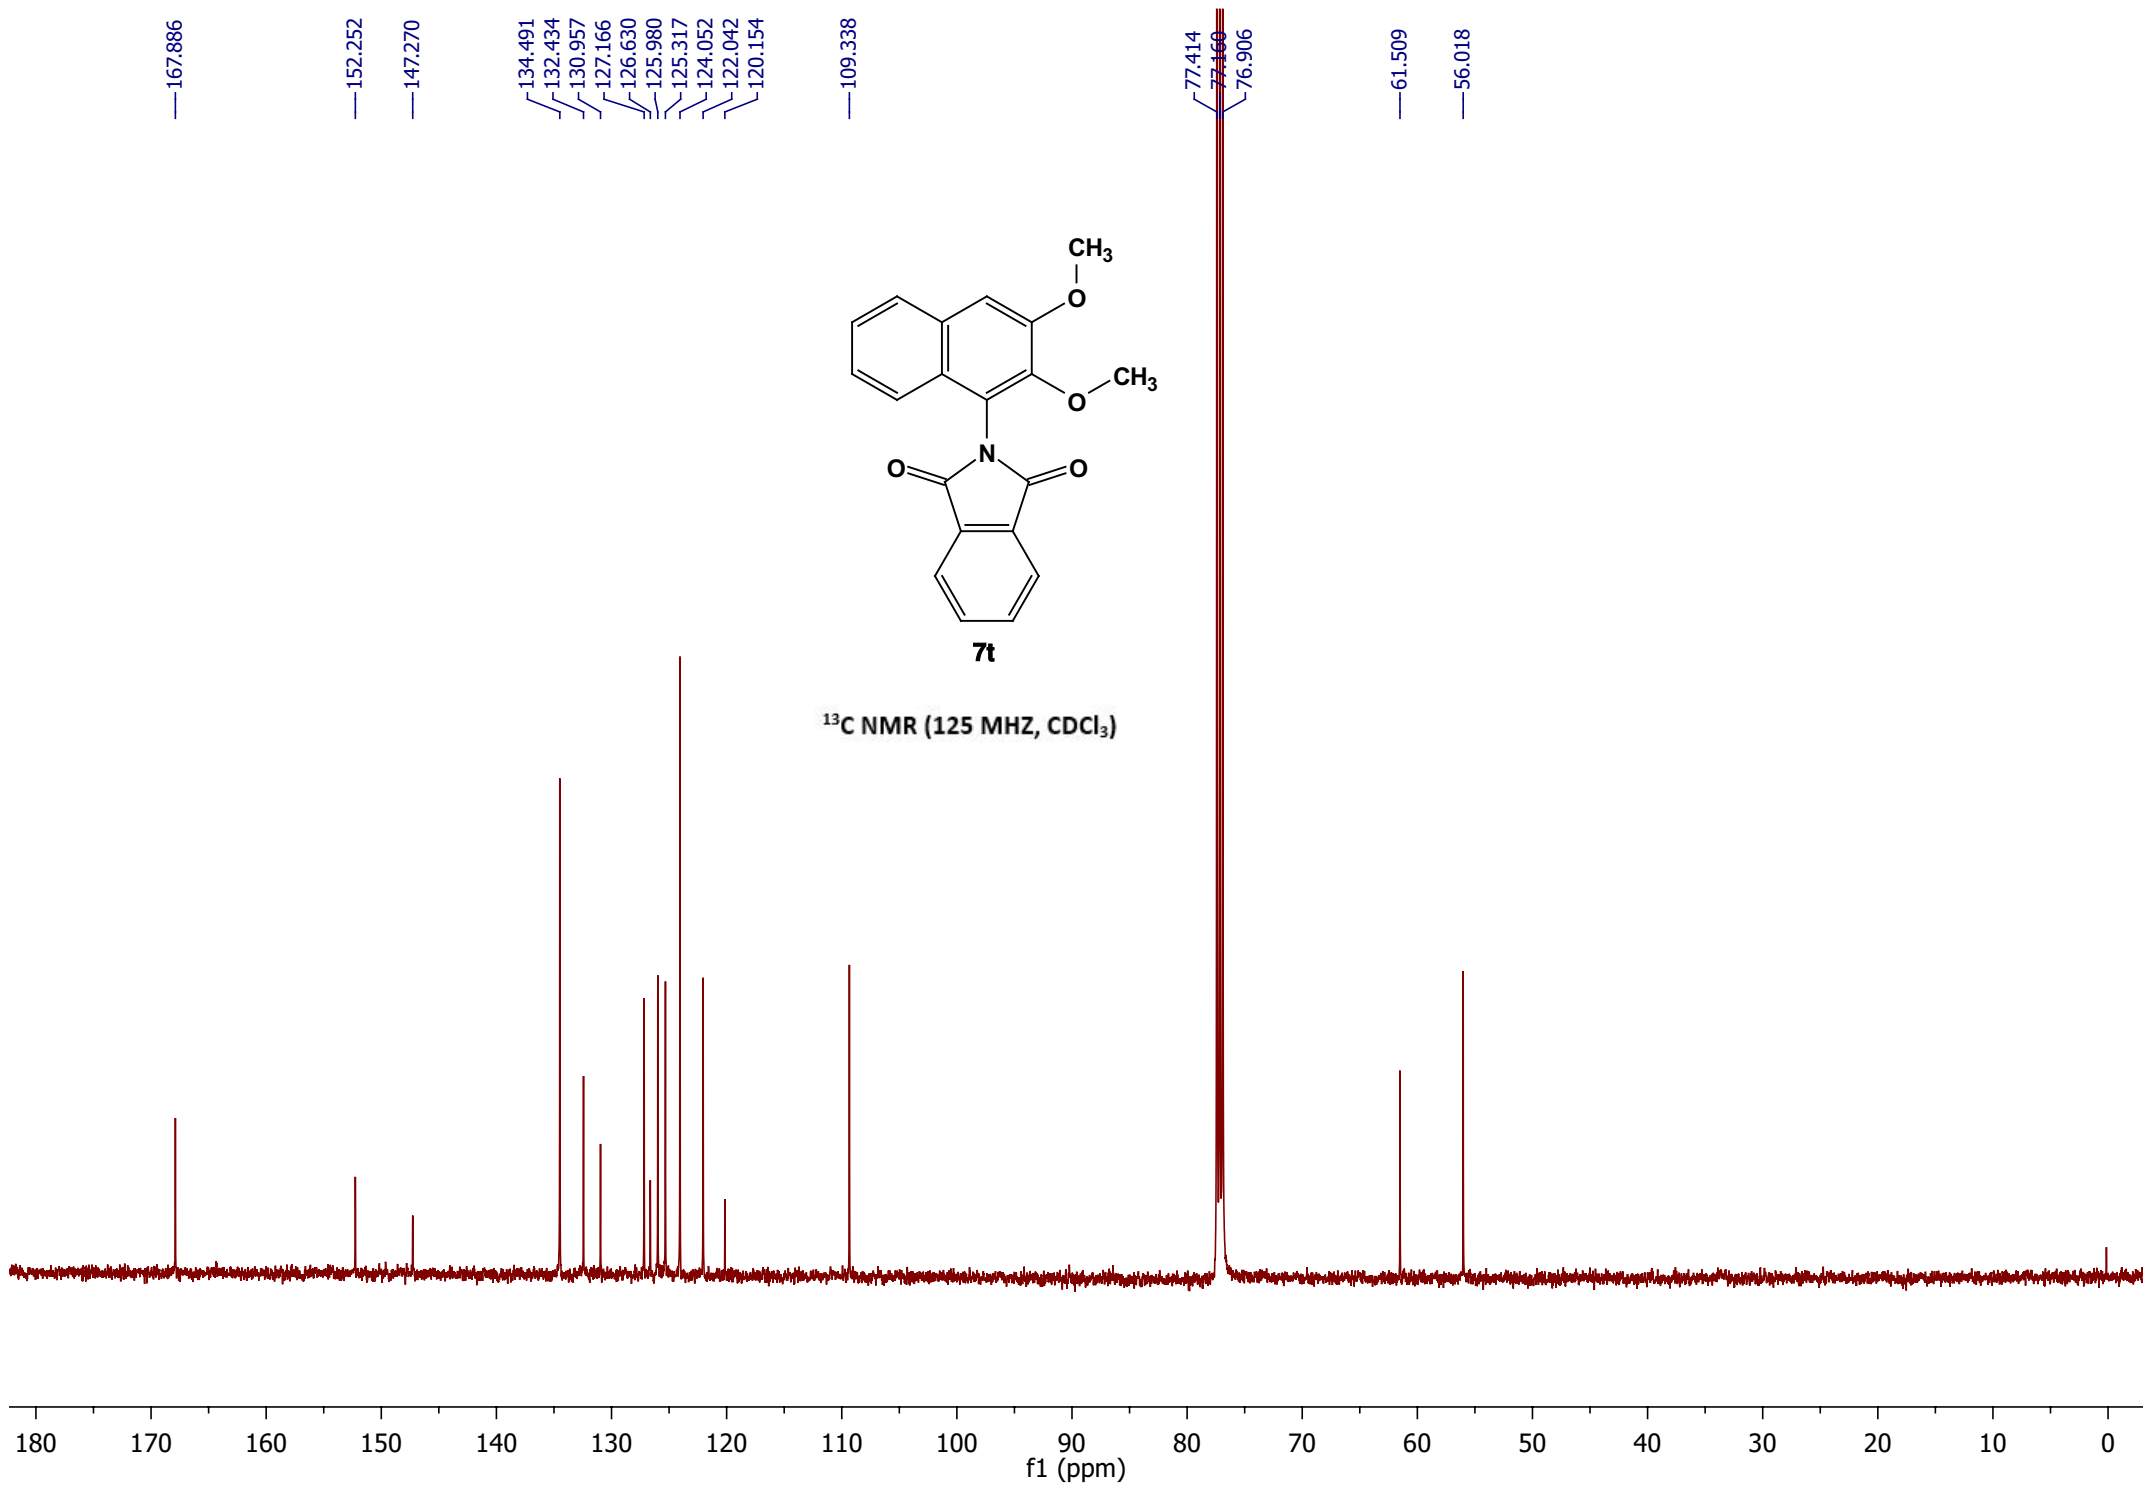

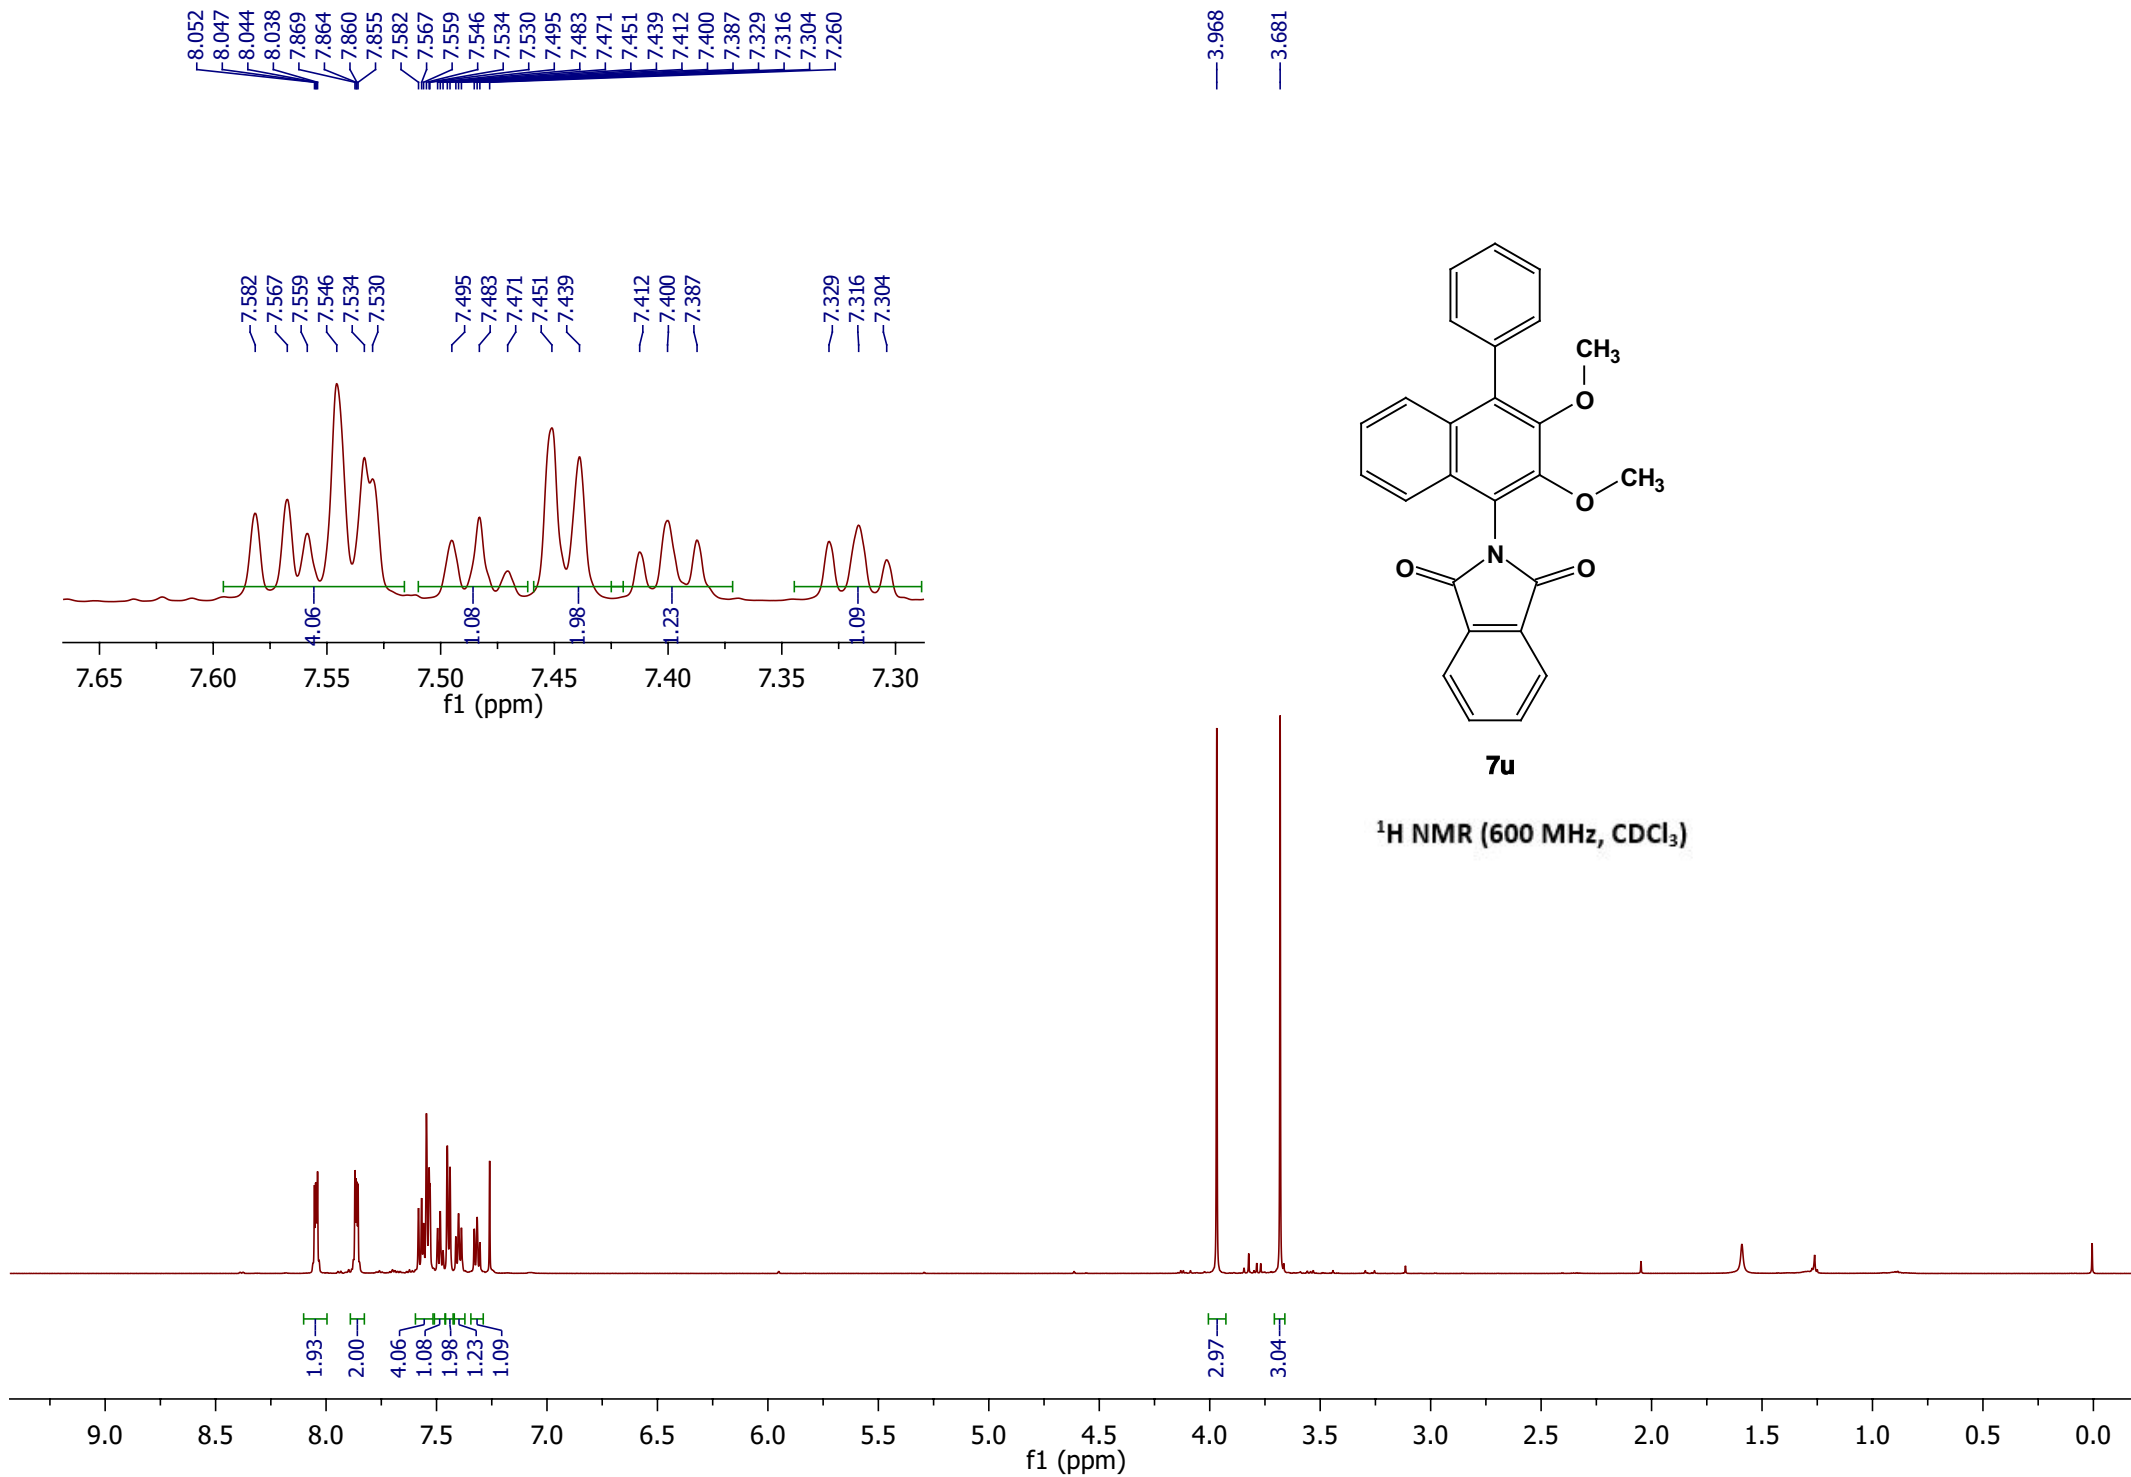

167.956

149.809  
149.222

135.458  
134.779  
134.467  
132.279  
130.460  
130.403  
128.601  
128.307  
127.684  
126.615  
126.386  
125.614  
123.987  
121.909  
119.611

77.253  
77.041  
76.830

61.329  
60.980

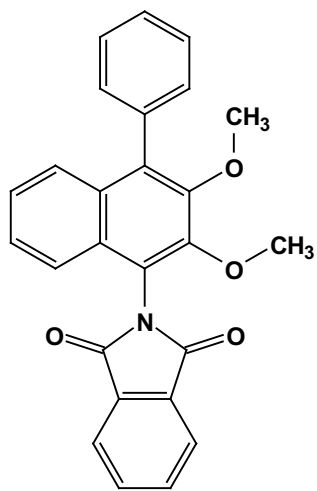

7u

<sup>13</sup>C NMR (150 MHz, CDCl<sub>3</sub>)

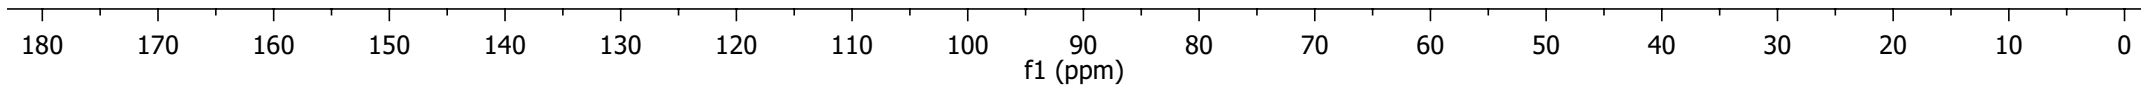



8.299  
8.285  
8.129  
8.116  
8.001  
7.995  
7.988  
7.826  
7.820  
7.812  
7.603  
7.591  
7.578  
7.575  
7.572  
7.558  
7.547

6.606

3.977

3.815

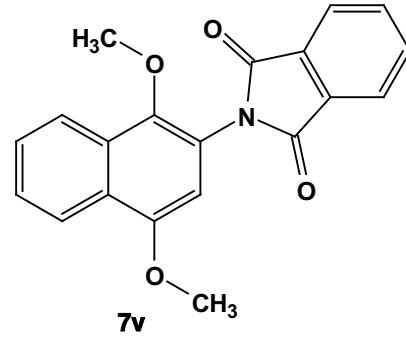

<sup>1</sup>H NMR (600 MHz, CDCl<sub>3</sub>)

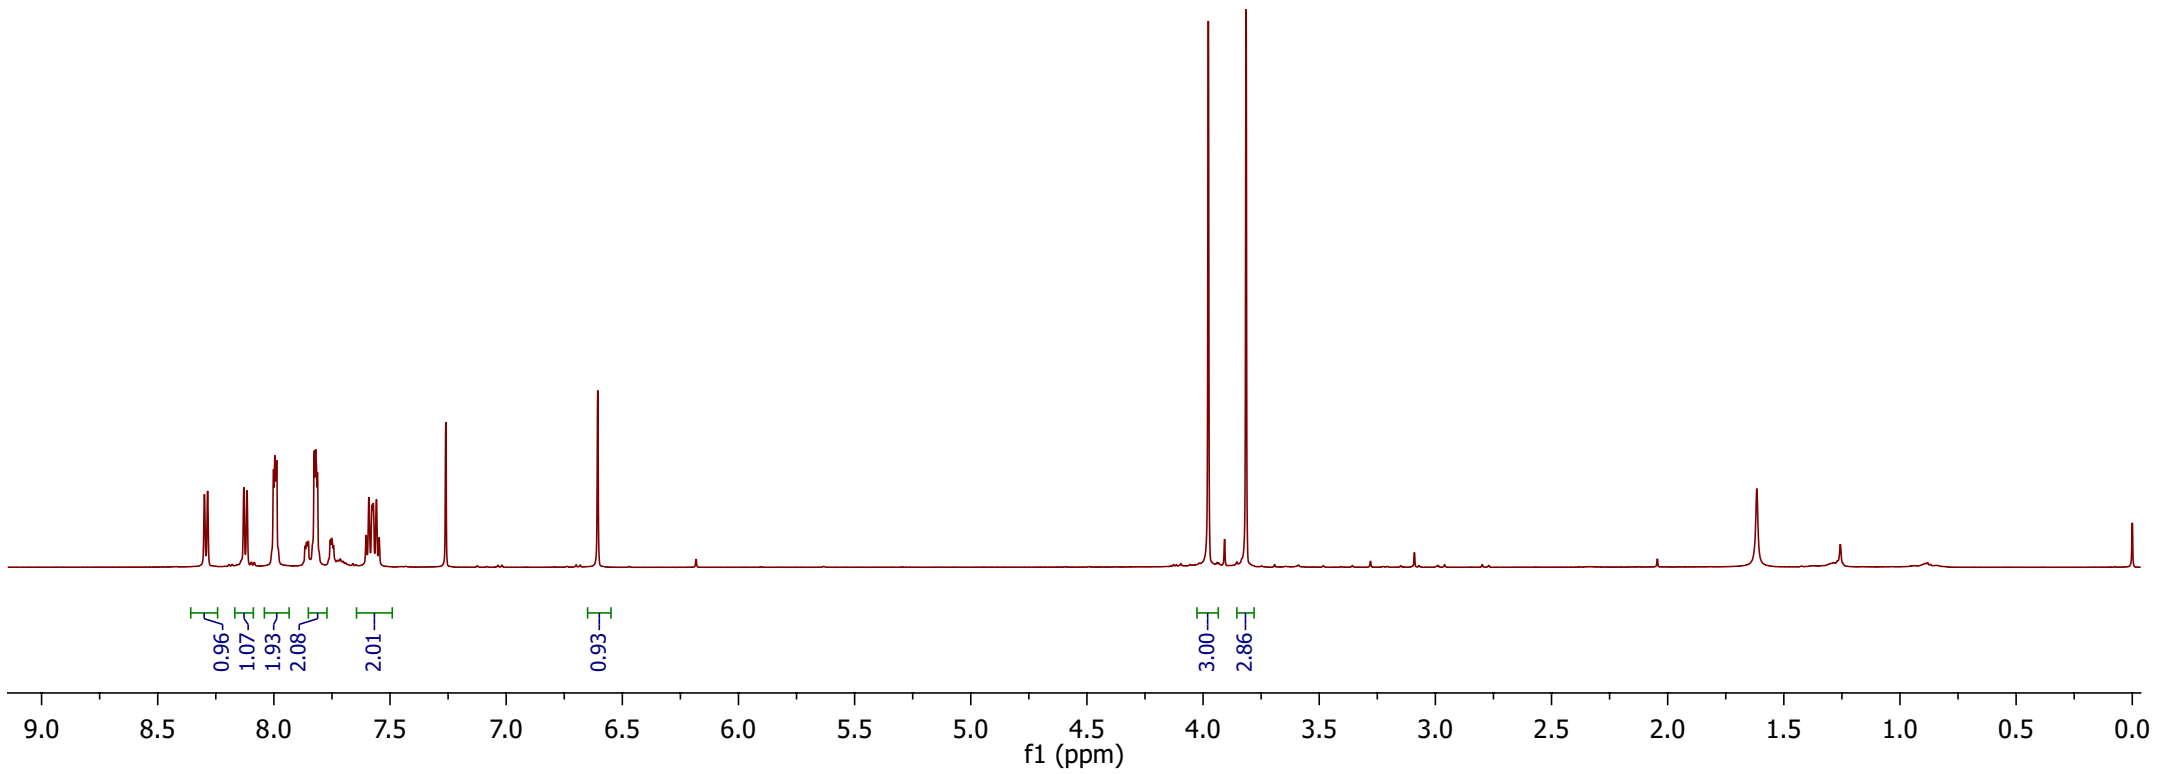

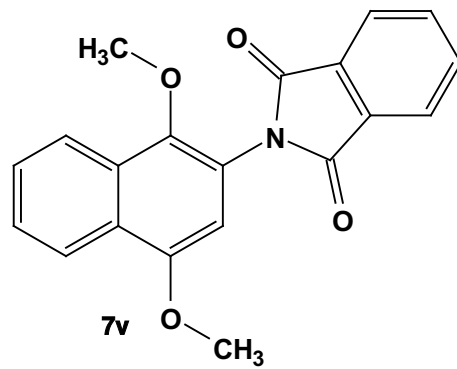

<sup>1</sup>H NMR (500 MHz, CDCl<sub>3</sub>)

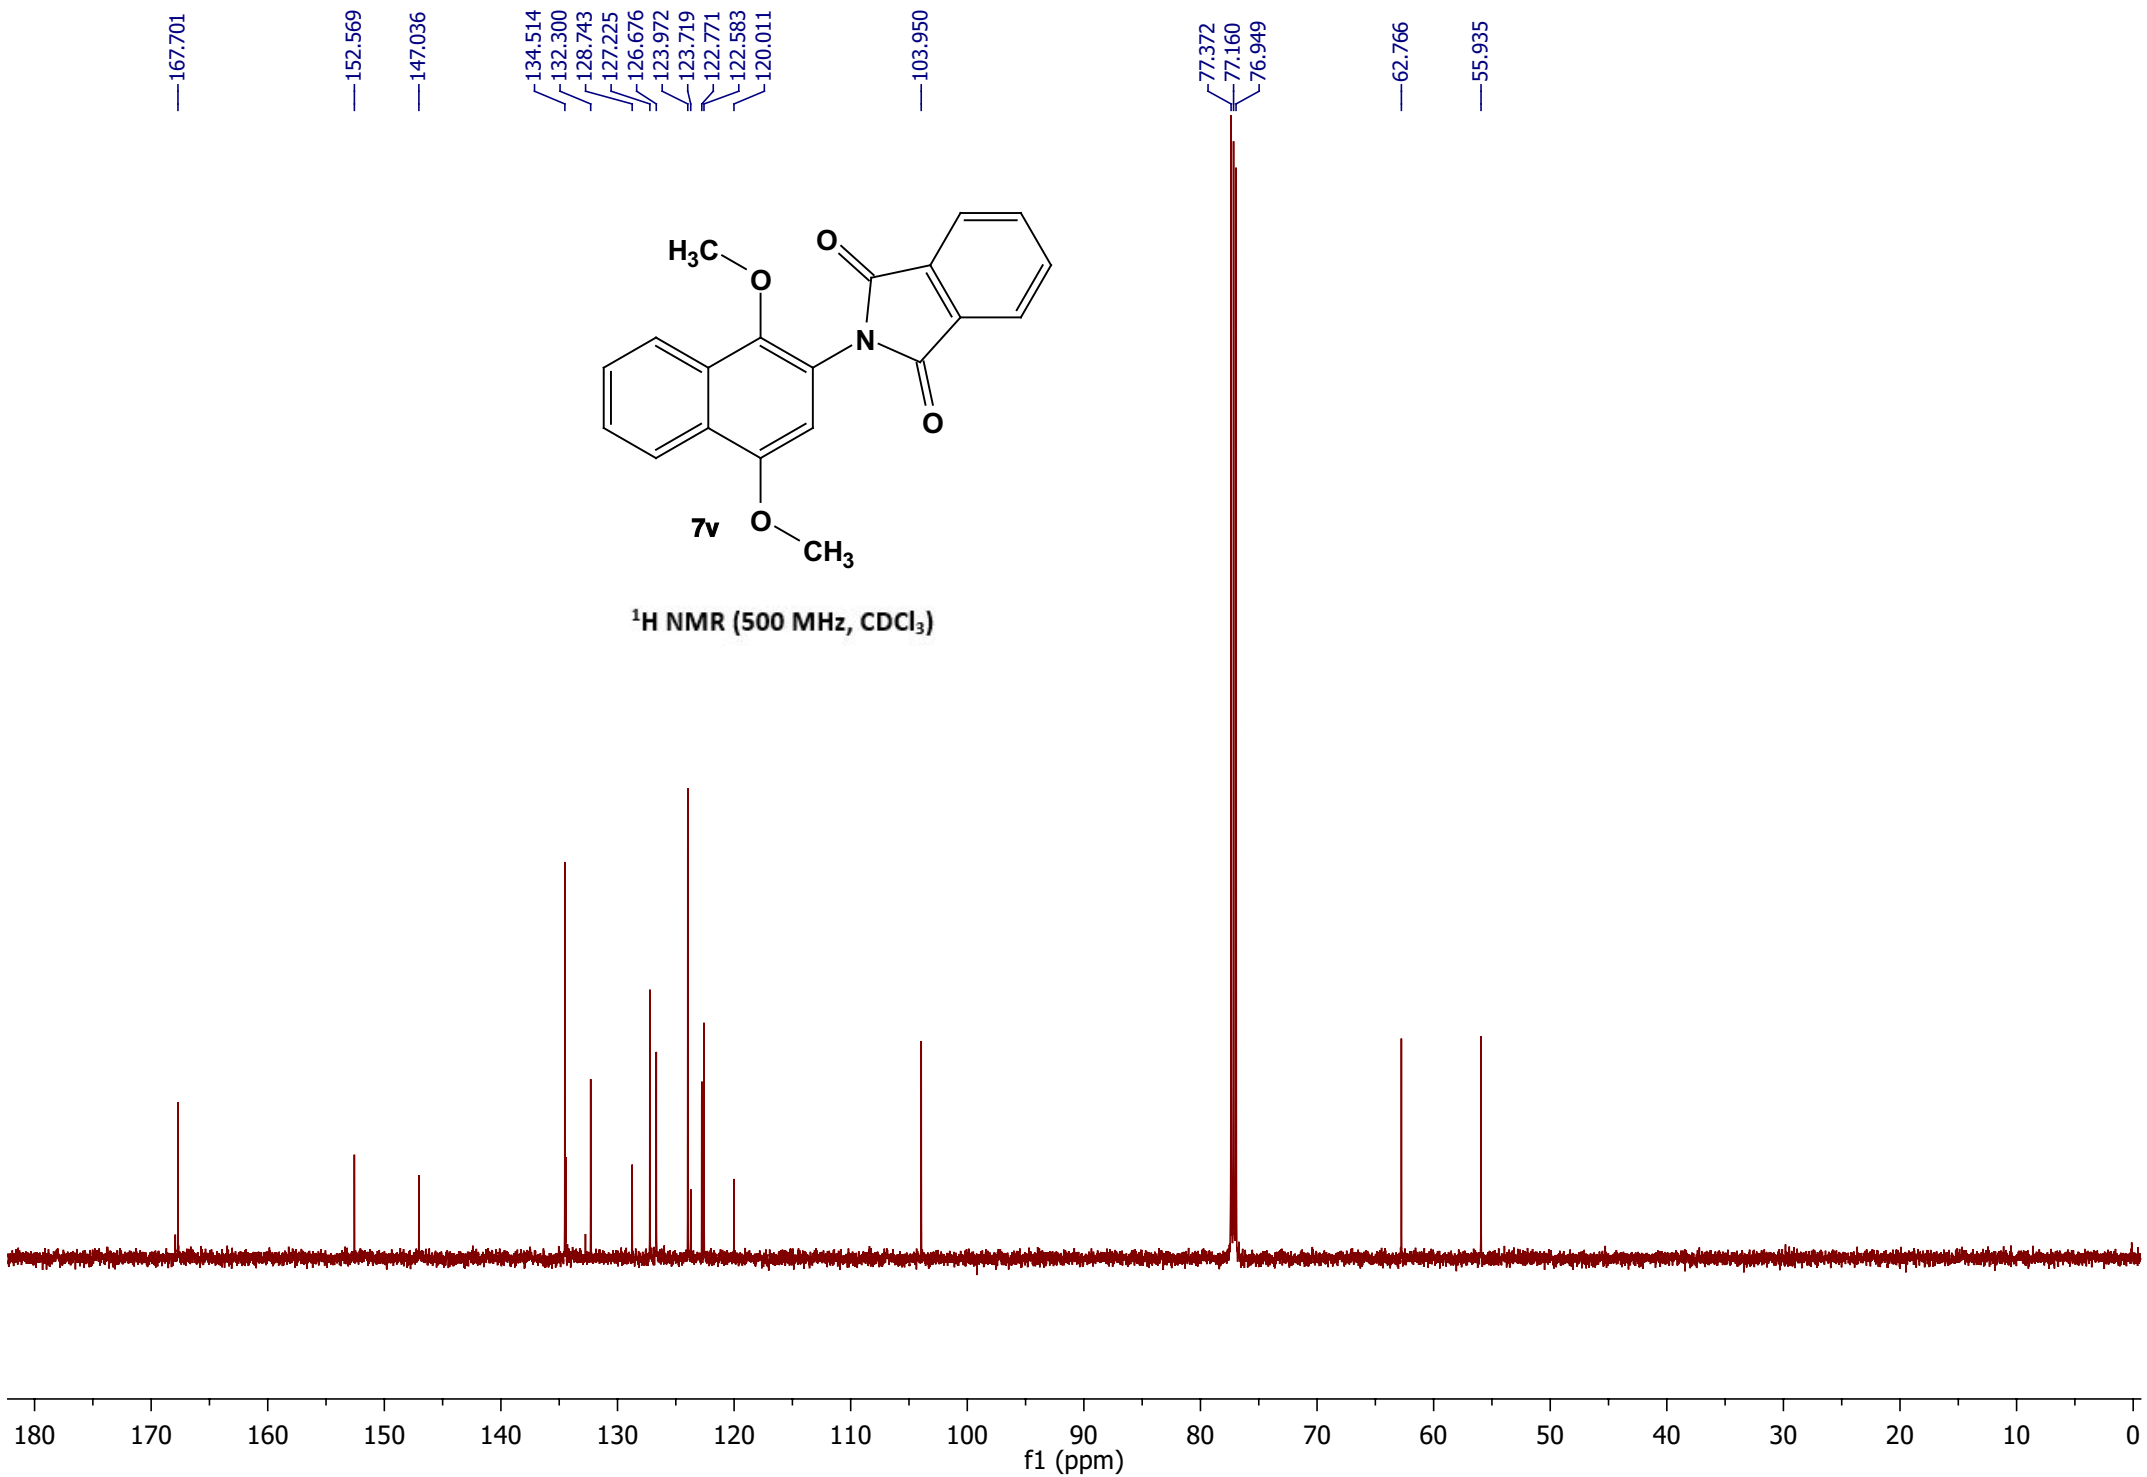

7.938  
7.933  
7.928  
7.921  
7.780  
7.772  
7.767  
7.761  
7.755  
7.248  
6.945  
6.942  
6.814  
6.810

3.945  
3.936  
3.932  
3.923  
3.919  
3.910

1.844  
1.831  
1.818  
1.804  
1.791  
1.778  
1.764  
1.663  
1.650  
1.636  
1.623  
1.574  
1.567  
1.553  
1.540  
1.526  
1.483  
1.470  
1.457  
1.443  
0.941  
0.928  
0.771  
0.759

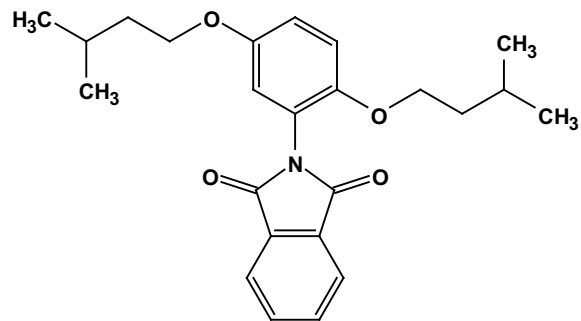

7w

<sup>1</sup>H NMR (500 MHz, CDCl<sub>3</sub>)

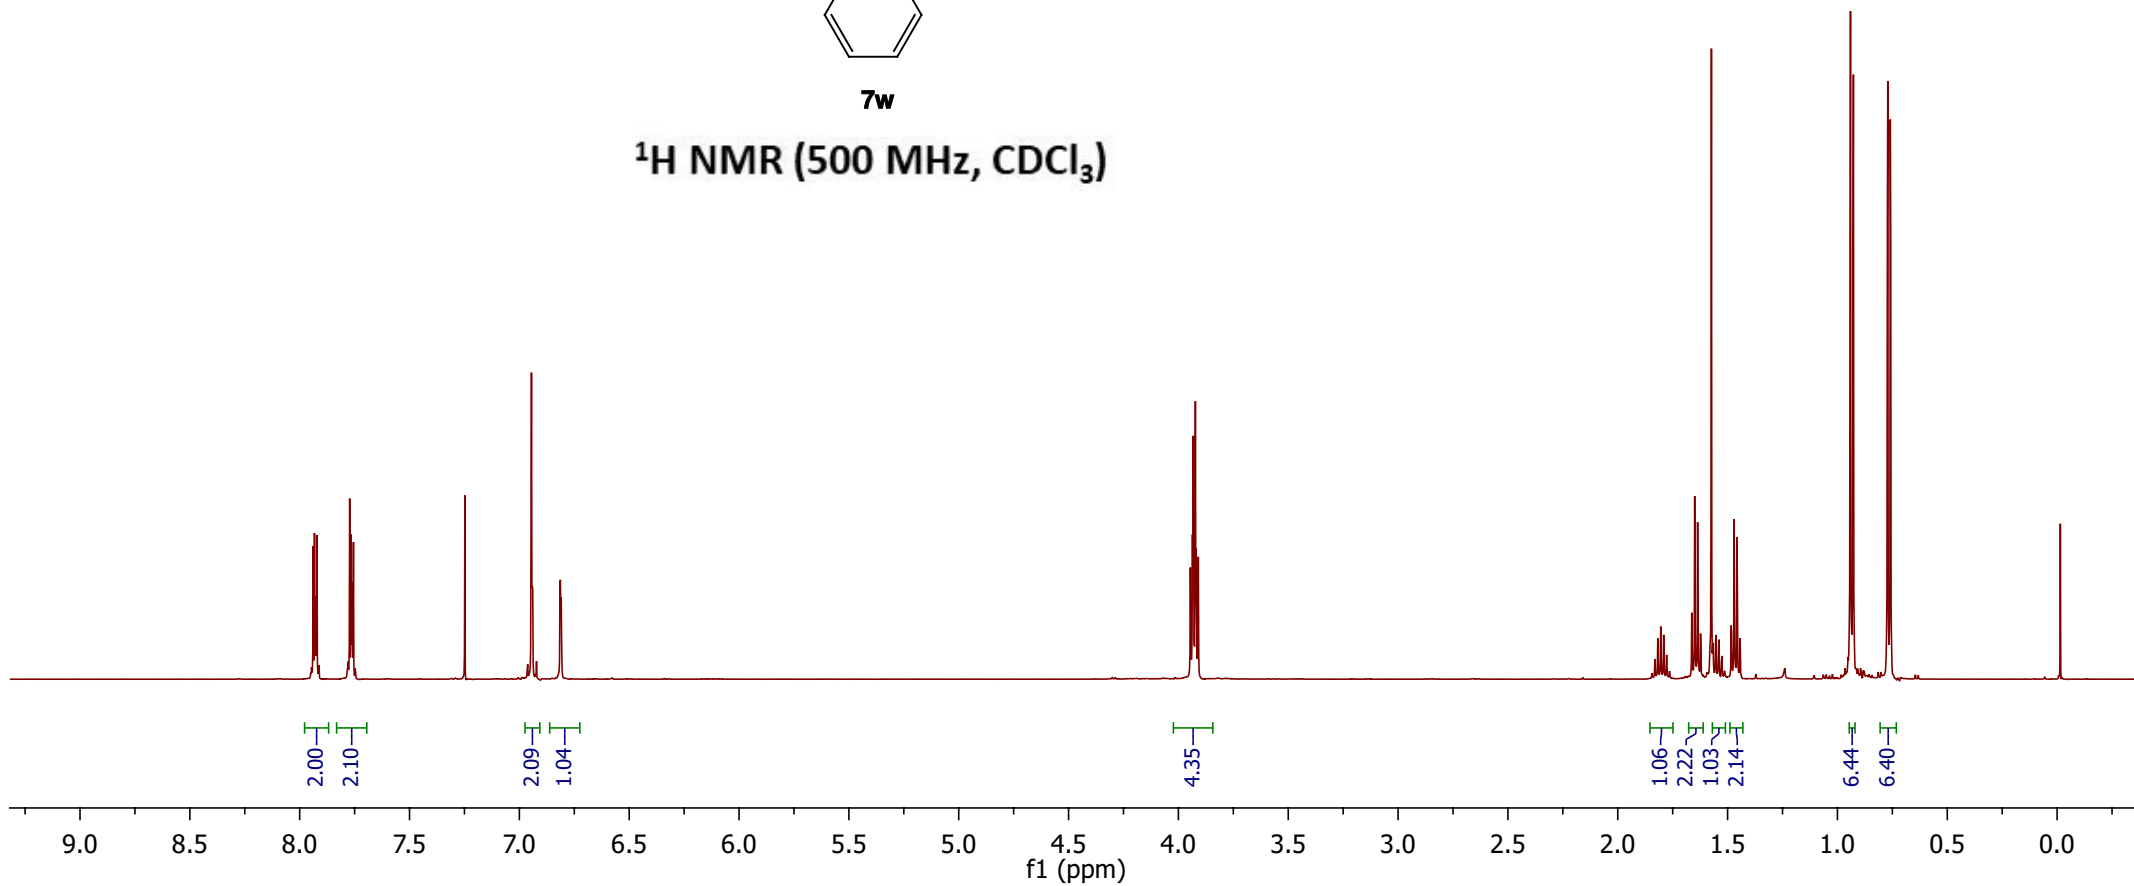

—167.526

—153.204

—149.114

—134.231

—132.366

—123.705

—121.178

—116.683

—116.222

—114.320

—77.371

—77.160

—76.948

—67.942

—67.190

—38.167

—37.993

—25.159

—25.122

—22.723

—22.585

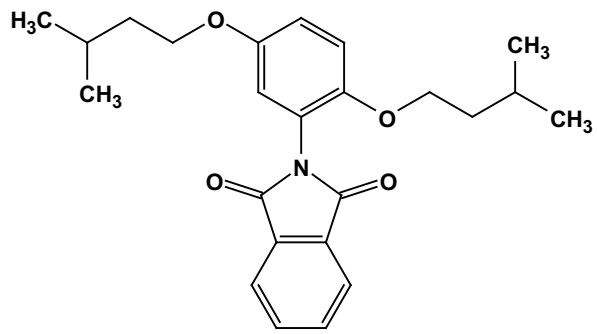

**7w**

<sup>13</sup>C NMR (150 MHz, CDCl<sub>3</sub>)

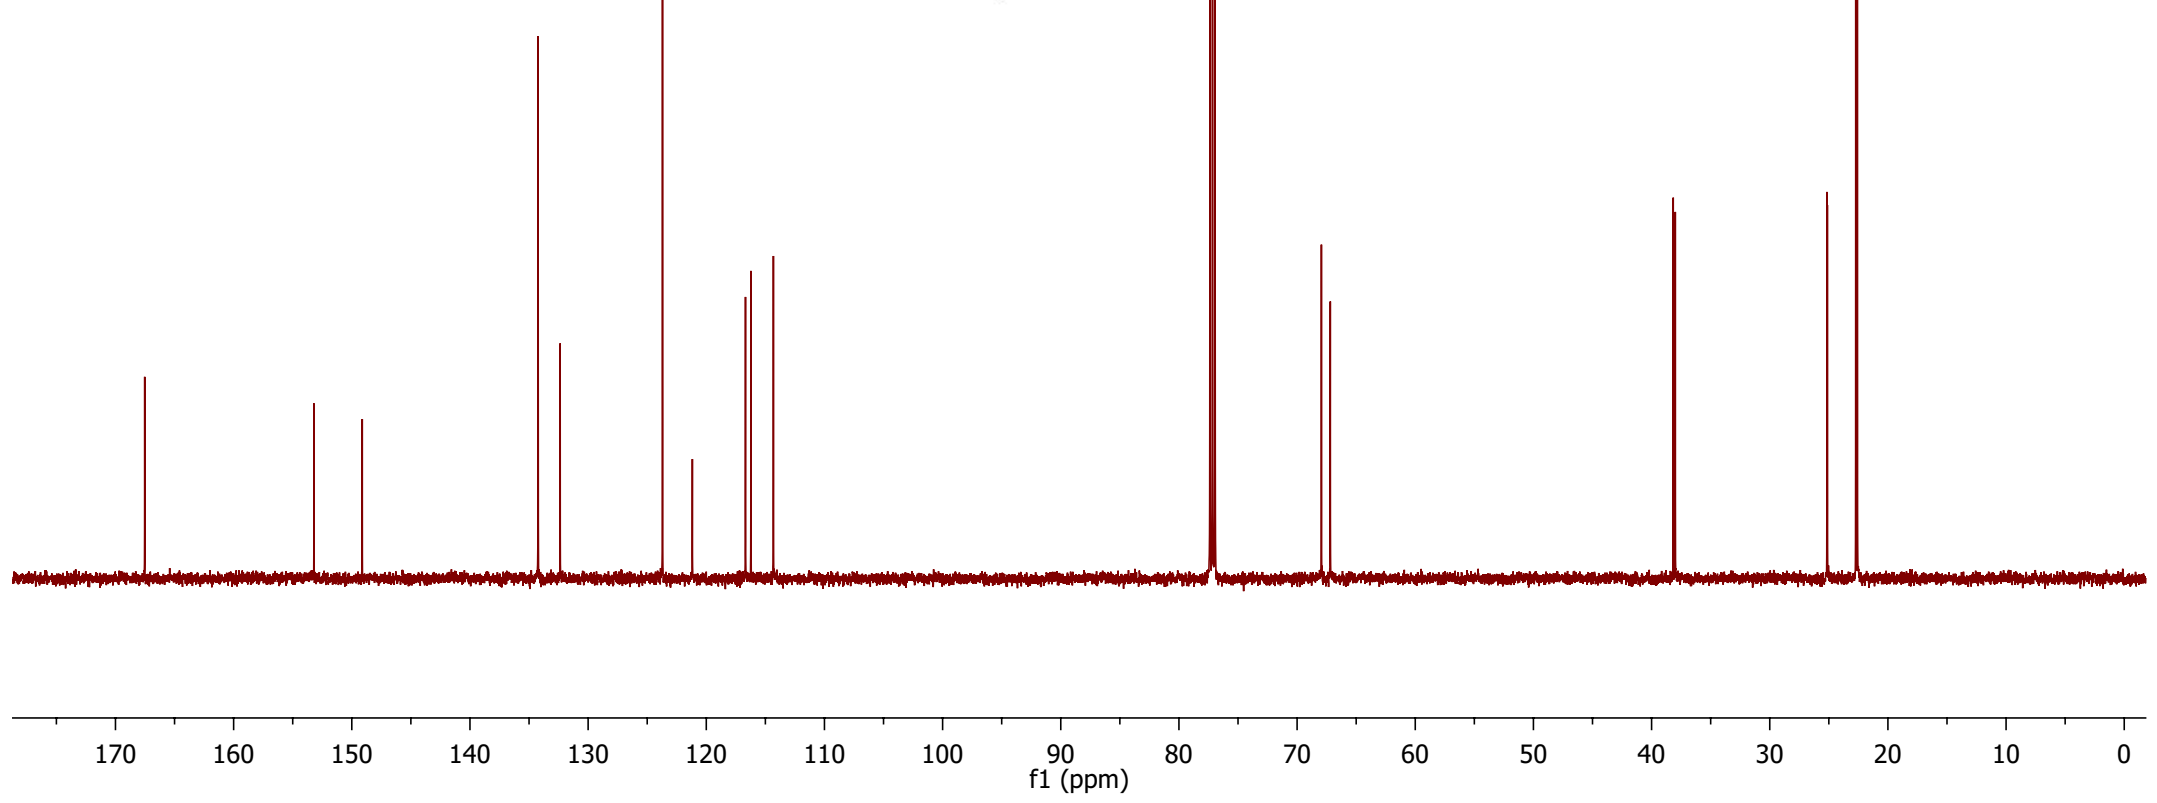

7.883  
7.853  
7.837  
7.714  
7.698

7.260

6.207

3.837  
3.748

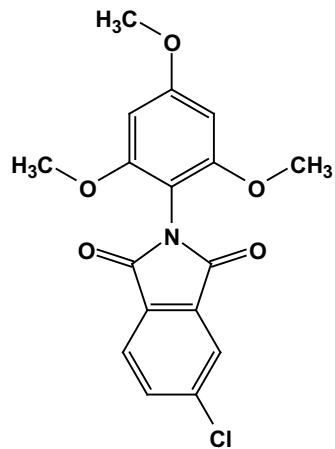

7x

<sup>1</sup>H NMR (500 MHz, CDCl<sub>3</sub>)

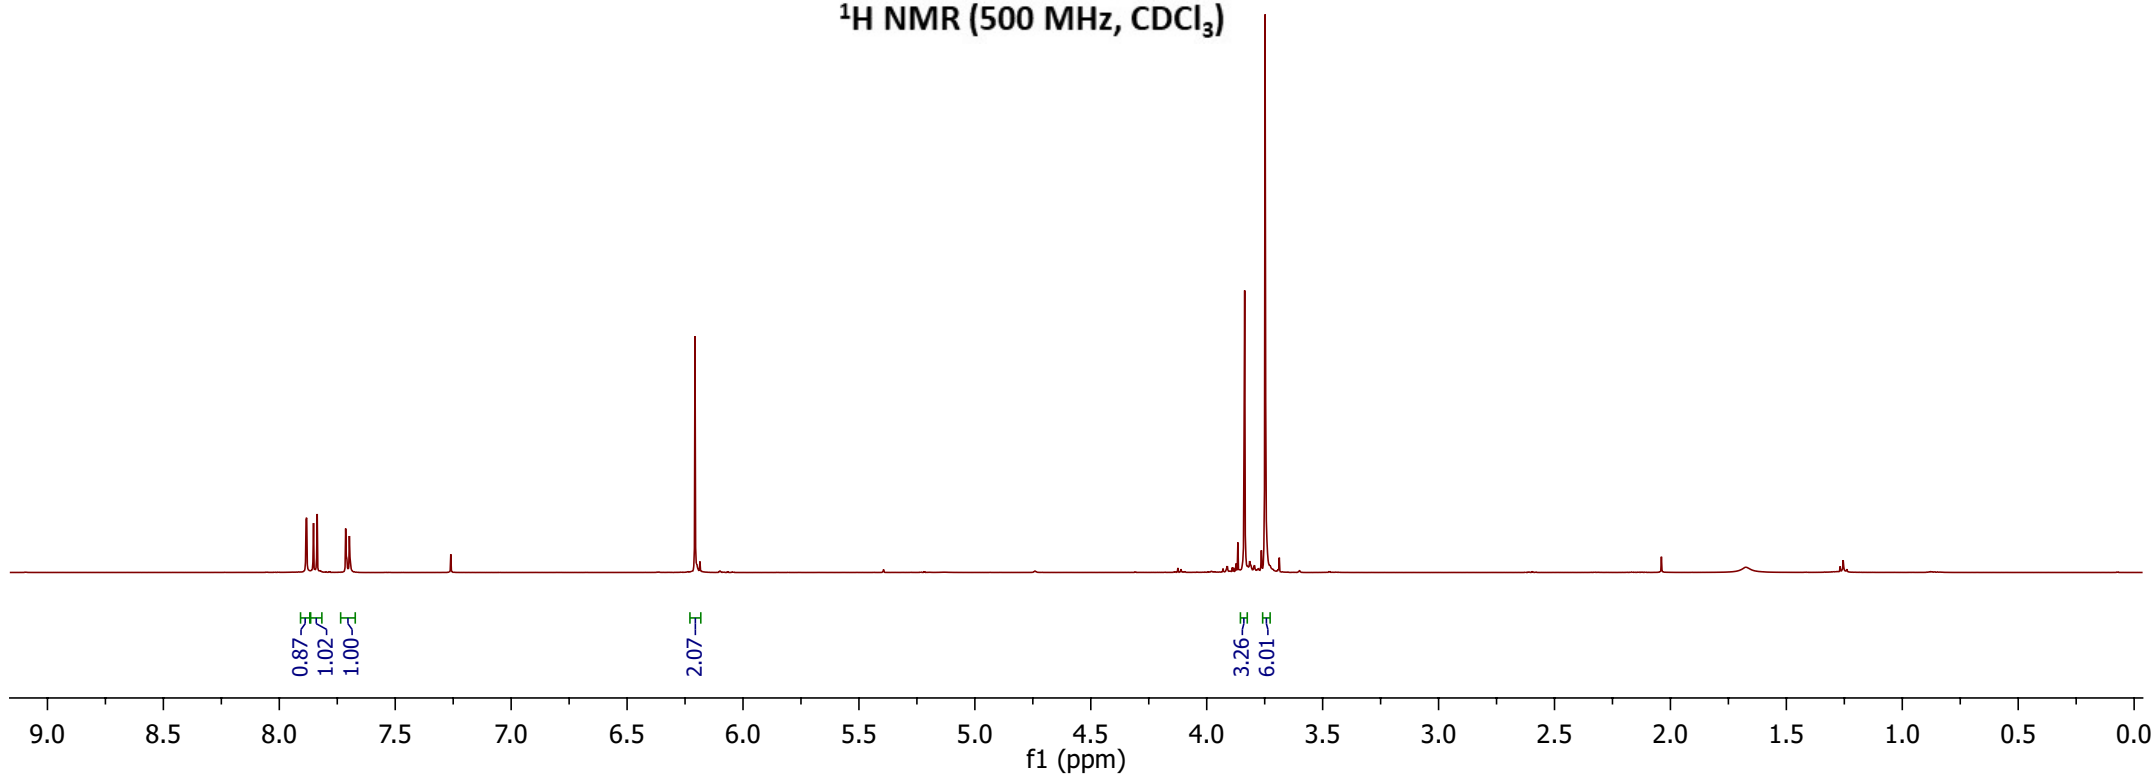

166.790  
166.445  
162.321  
157.638

140.582

134.290  
133.942  
130.691

124.829  
123.993

101.512

91.142

77.361  
77.107  
76.852

56.067  
55.613

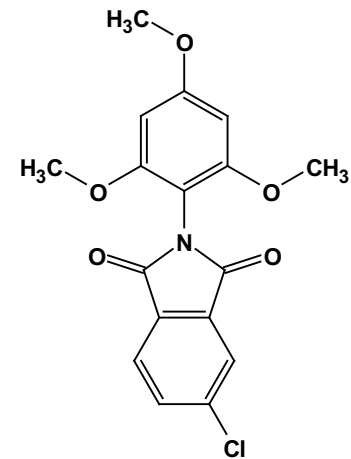

7x

<sup>13</sup>C NMR (125 MHz, CDCl<sub>3</sub>)

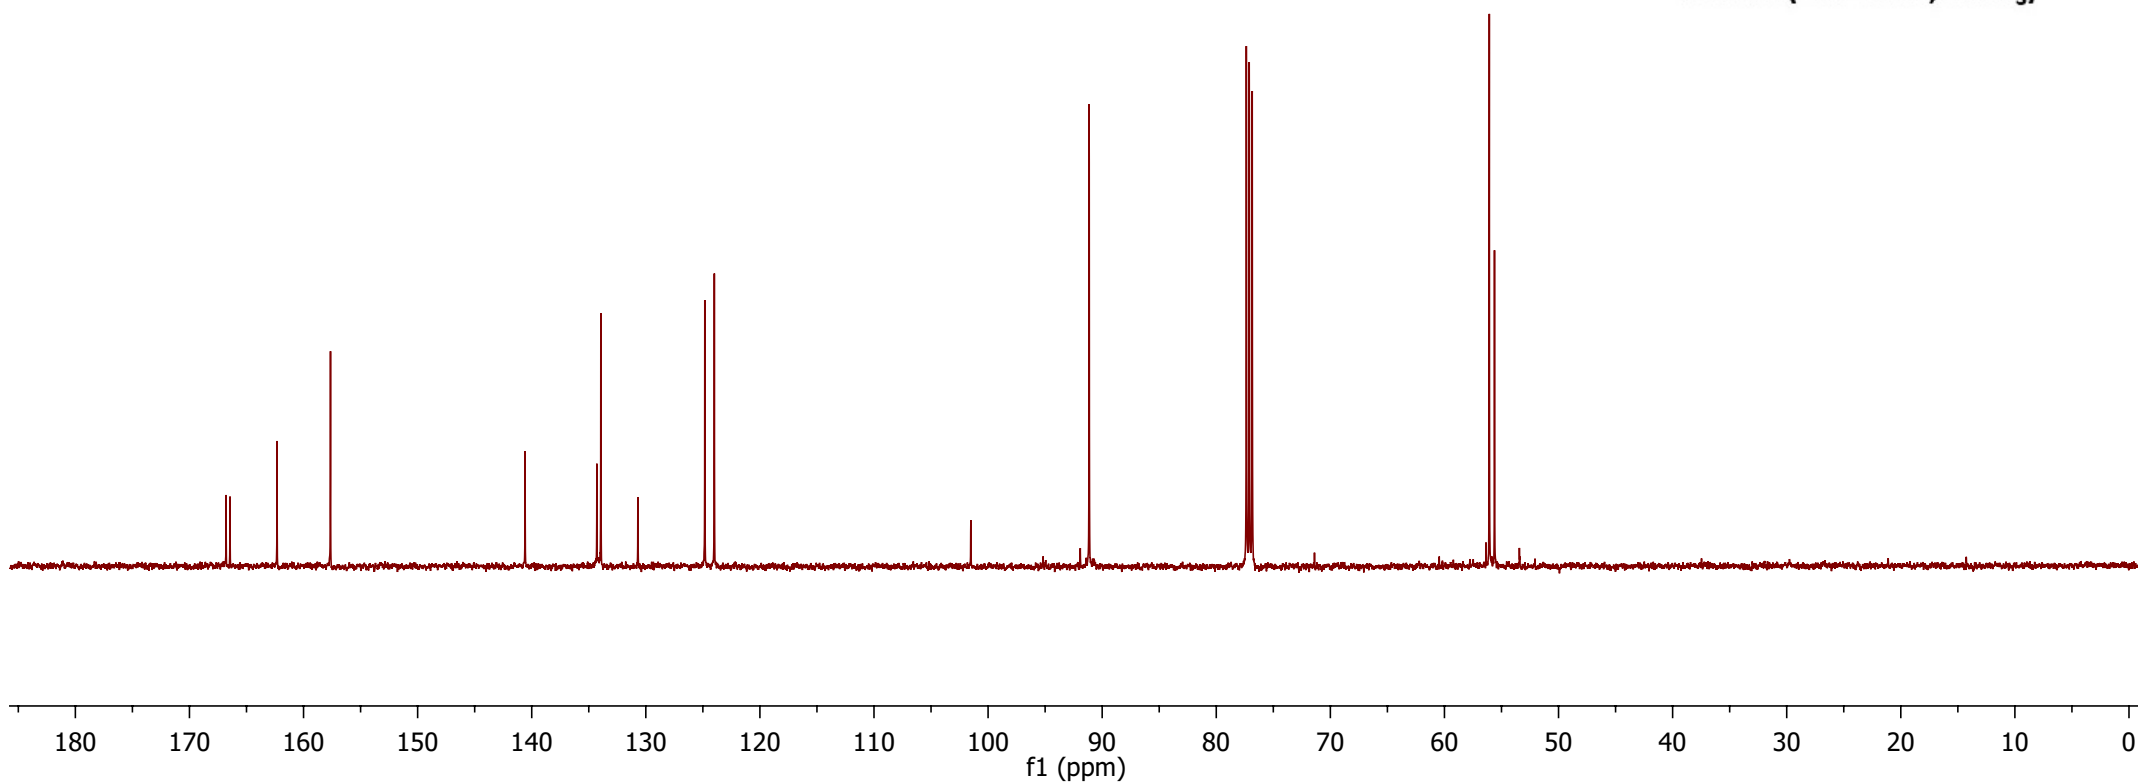

8.052  
7.889  
7.885  
7.873  
7.869  
7.783  
7.767

7.260

6.207

3.840  
3.748

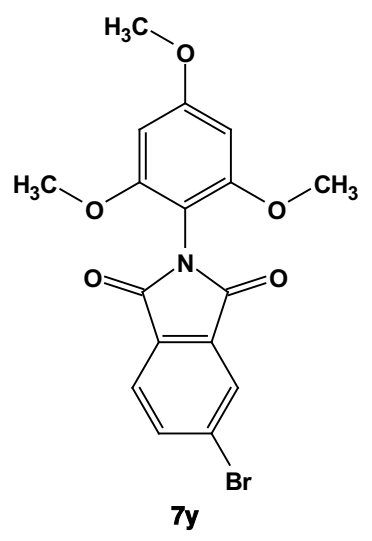

<sup>1</sup>H NMR (500 MHz, CDCl<sub>3</sub>)

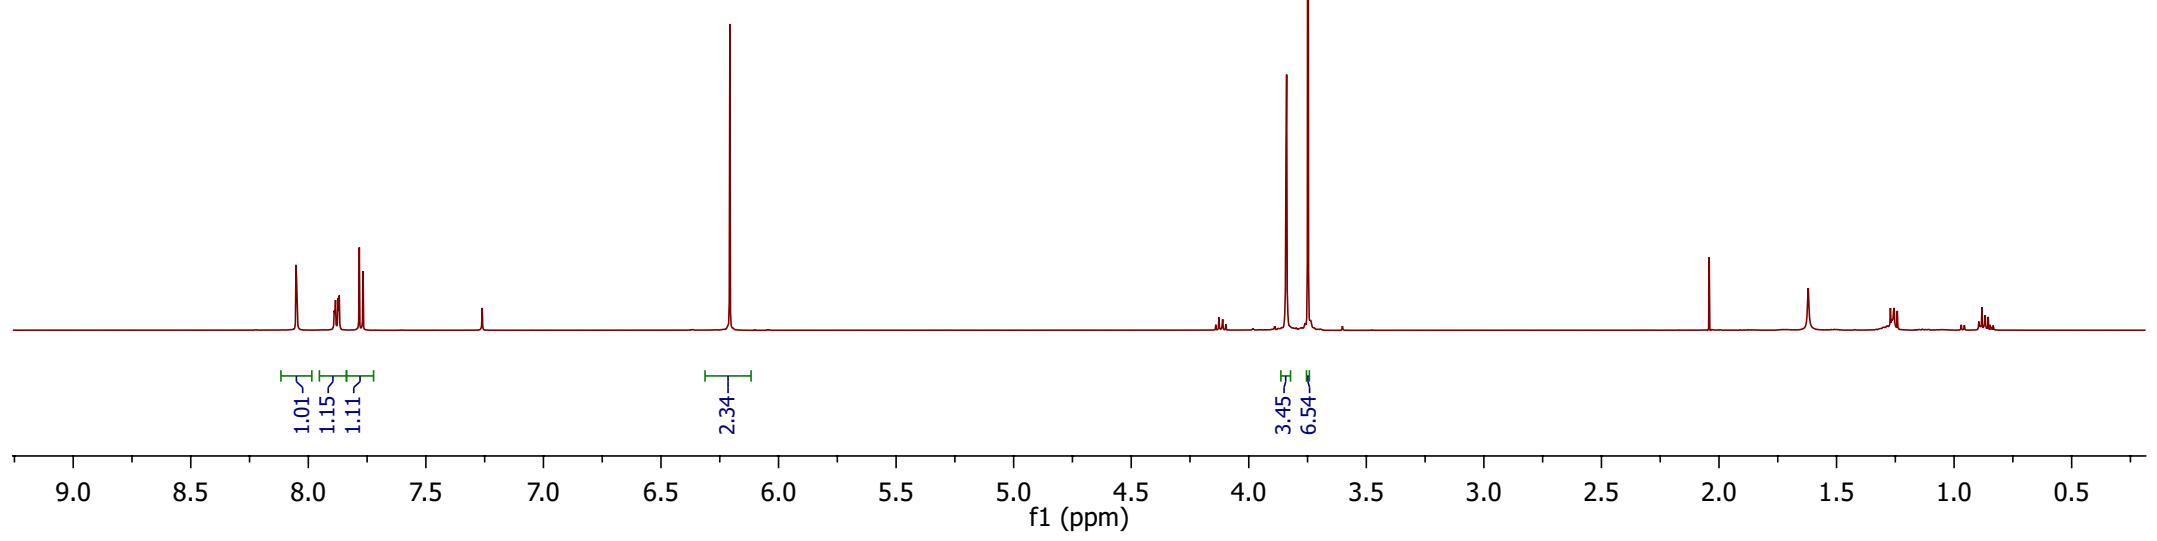

167.004  
166.445  
162.376  
157.680

136.953  
134.325  
131.199  
128.862  
126.980  
125.031

101.487

91.166

77.414  
77.160  
76.905

56.124  
55.680

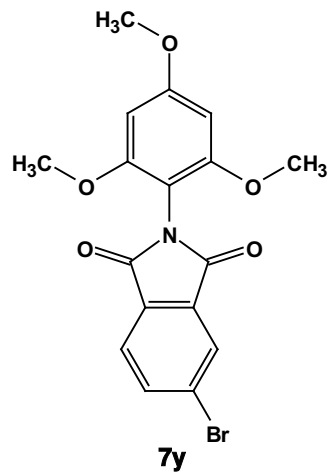

<sup>13</sup>C NMR (125 MHz, CDCl<sub>3</sub>)

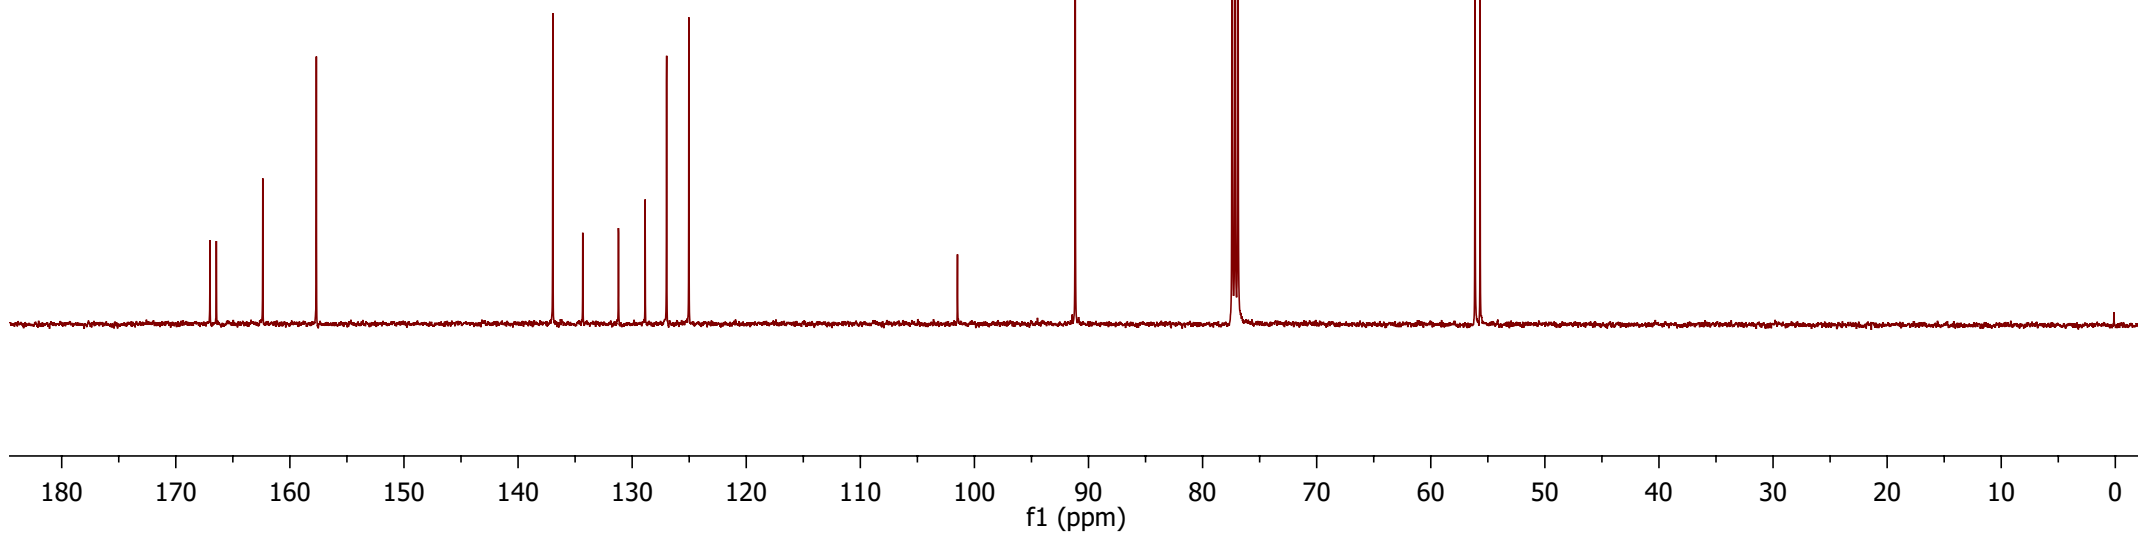



7.937  
7.930  
7.924  
7.919  
7.914  
7.905  
7.865  
7.857  
7.847  
7.771  
7.764  
7.754  
7.746  
7.738  
7.335  
7.255  
7.162  
7.157  
7.147  
6.661  
6.644  
6.583  
6.570  
6.565

3.828  
3.767  
3.754

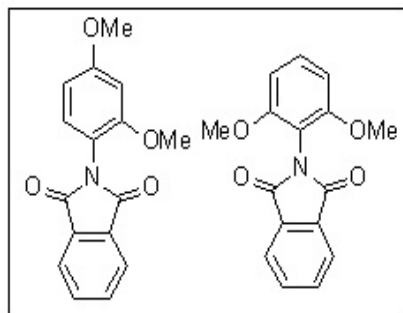

**7aa1**

**7aa2**

<sup>1</sup>H NMR (500 MHz, CDCl<sub>3</sub>)

**7aa1 : 7aa2 = 11:1**  
Isomeric distribution was measured by the integration of the aromatic C-H signals.

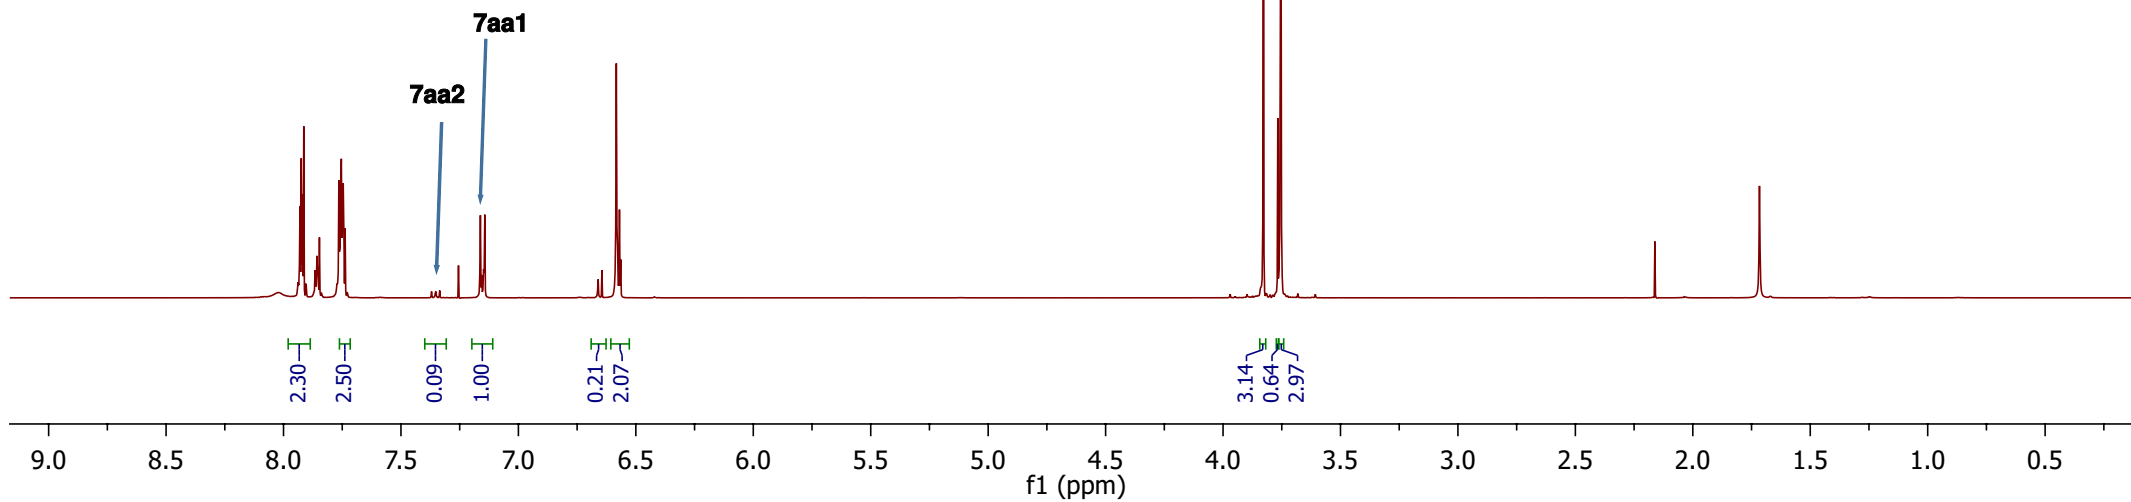

168.134  
167.907  
— 161.722  
157.145  
156.469

134.410  
134.185  
133.998  
132.747  
132.348  
130.939  
130.567  
123.726  
123.676

— 113.142

104.867  
104.462

— 99.821

77.415  
77.160  
76.905

56.186  
55.919  
55.696

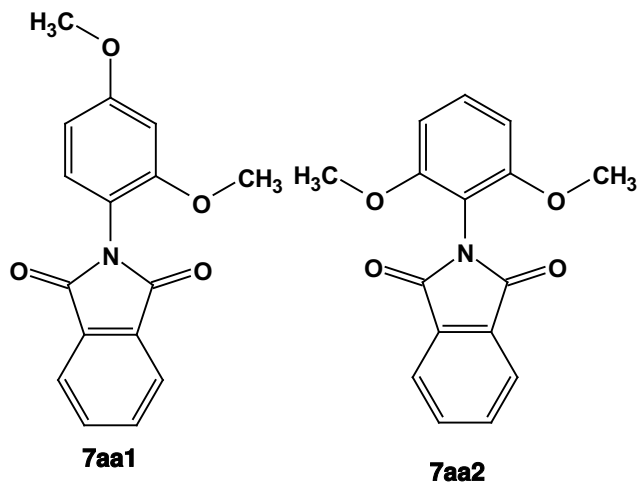

<sup>13</sup>C NMR (125 MHz, CDCl<sub>3</sub>)

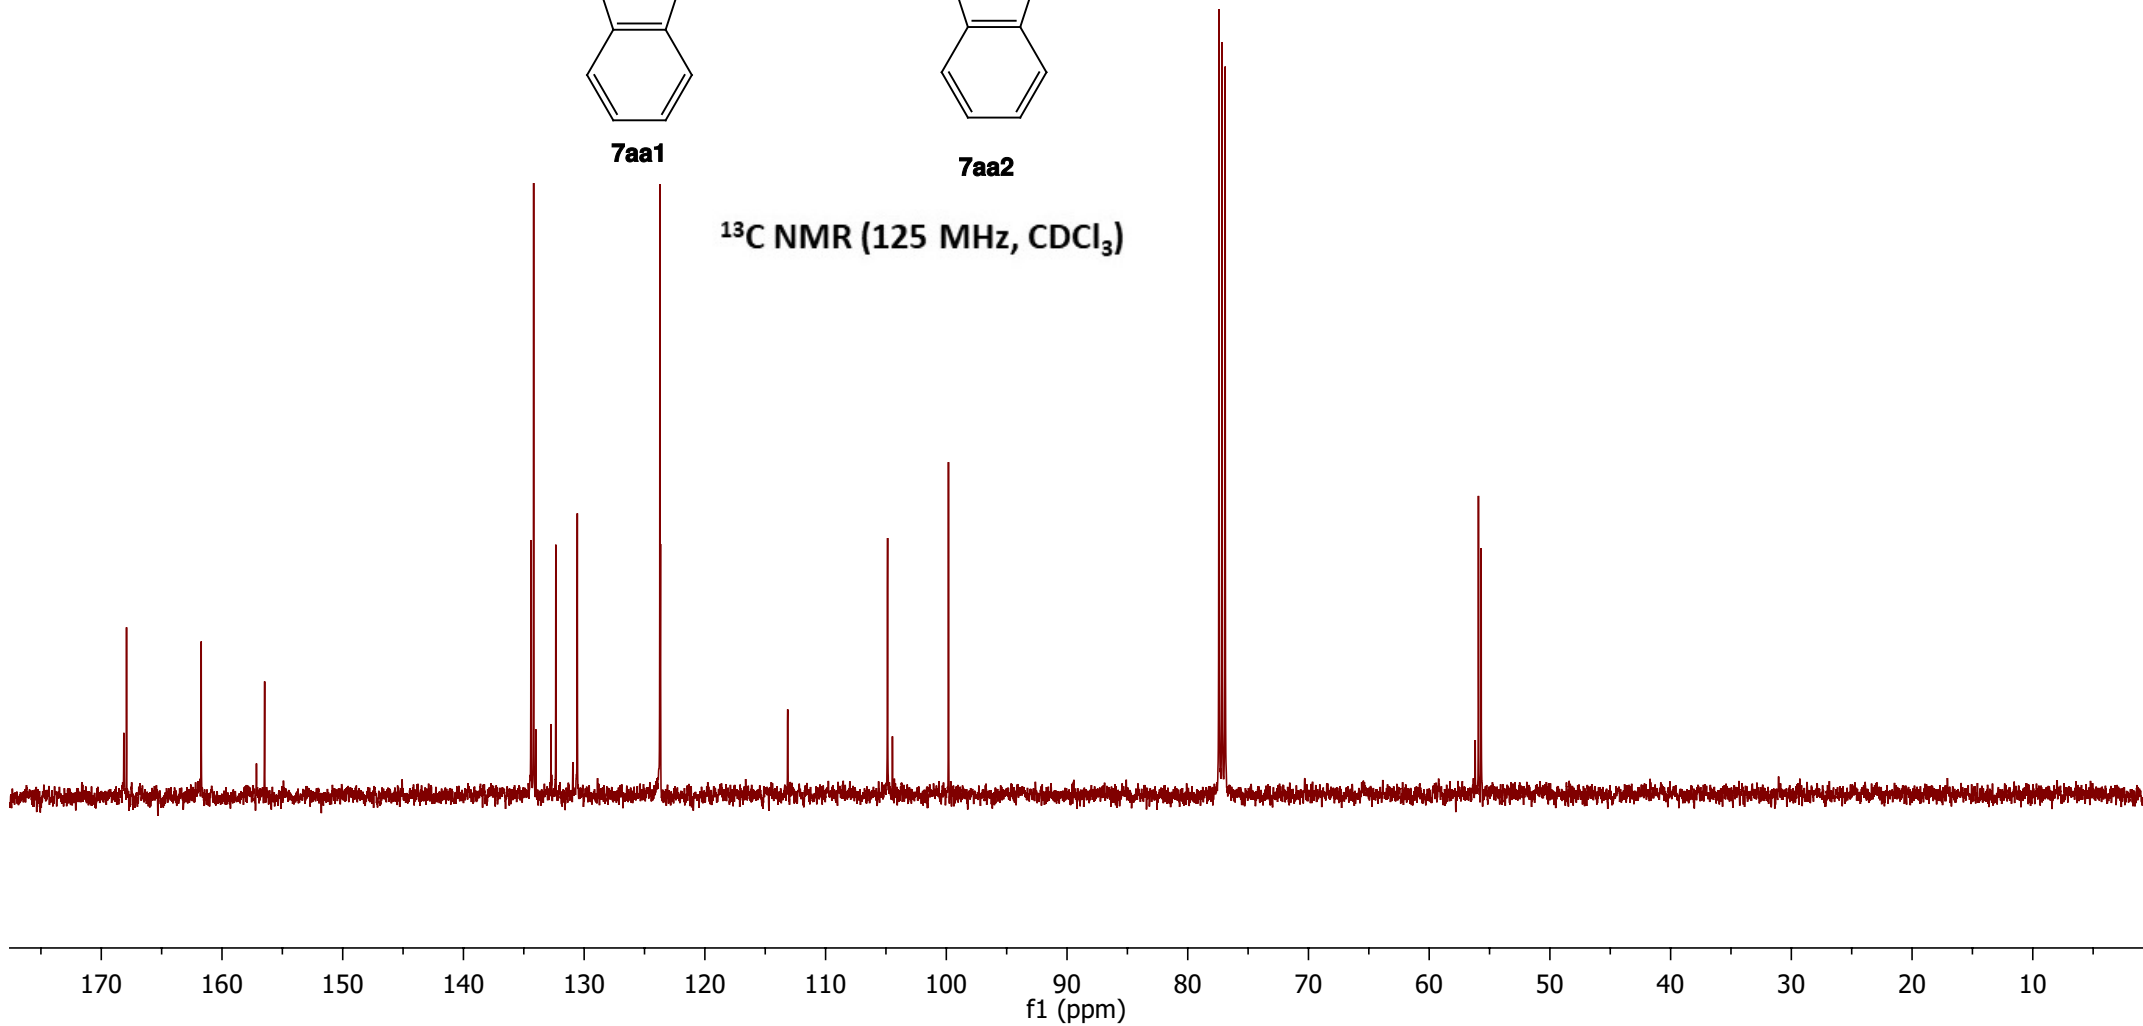

7.945  
7.938  
7.932  
7.927  
7.921  
7.775  
7.767  
7.762  
7.757  
7.751  
7.322  
7.306  
7.289  
7.260  
7.144  
7.127  
6.631  
6.613  
6.565  
6.548

3.988  
3.975  
3.962  
3.946  
3.934  
3.922  
3.908

1.805  
1.791  
1.775  
1.719  
1.619  
1.609  
1.595  
1.581  
1.460  
1.445  
1.357  
1.343  
1.313  
1.300  
1.293  
1.285  
1.269  
1.255  
1.237  
1.225  
1.195  
1.186  
1.163  
1.157  
1.146  
1.133  
1.122  
0.905  
0.892  
0.876  
0.860  
0.846

<sup>1</sup>H NMR (500 MHz, CDCl<sub>3</sub>)

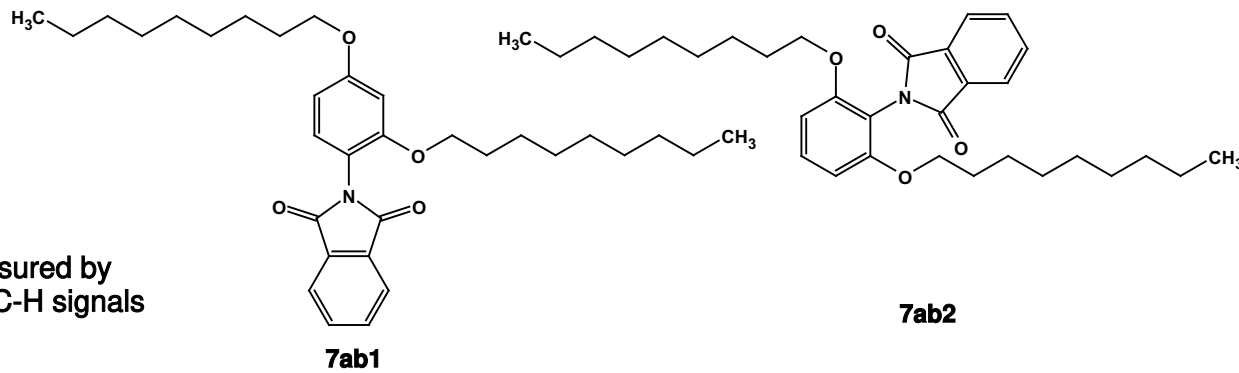

**7ab1 : 7ab2 = 6.66 : 1**

Isomeric distribution was measured by the integration of the aromatic C-H signals

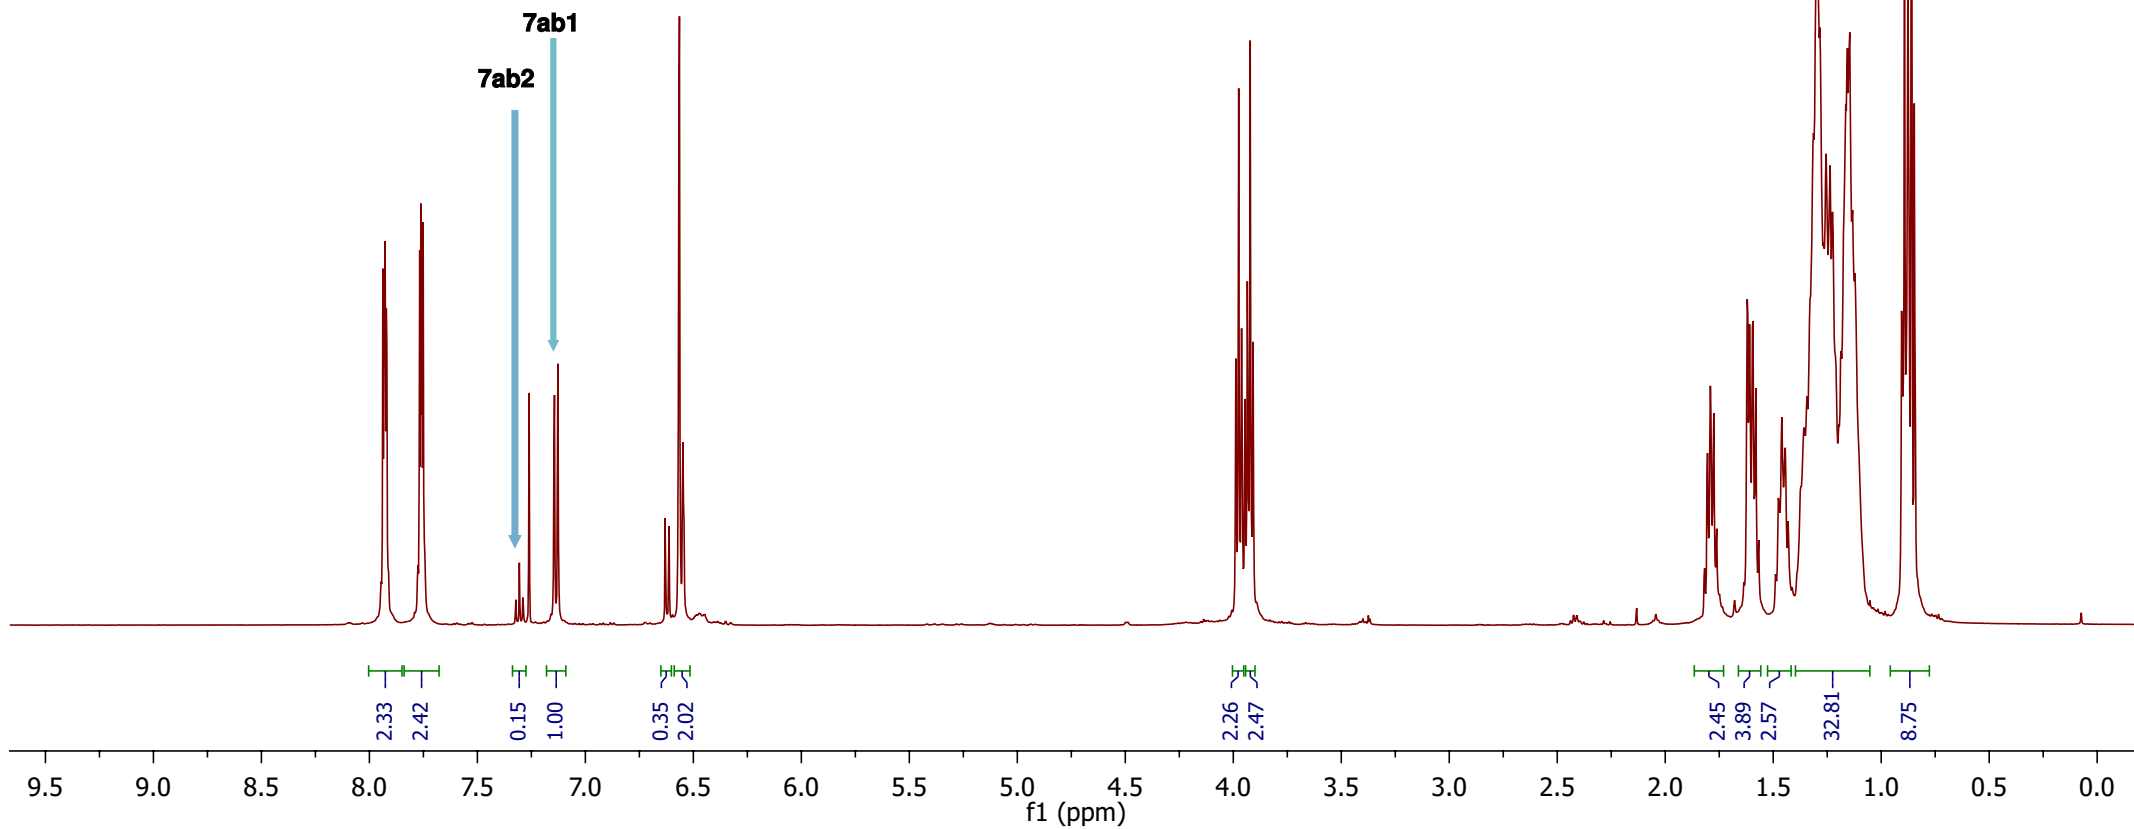

167.942  
167.412  
161.262  
156.716  
155.930

134.099  
133.875  
132.740  
132.425  
130.707  
130.408  
123.627  
123.522

113.301  
105.430  
105.349  
101.067

77.413  
77.160  
76.906  
68.980  
68.698  
68.431

32.008  
31.979  
29.826  
29.668  
29.543  
29.398  
29.359  
29.312  
29.239  
29.105  
29.015  
26.177  
25.902  
22.802  
22.749  
14.233

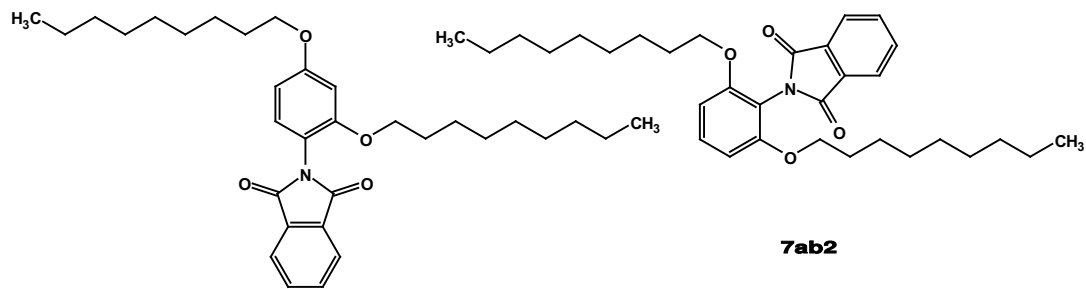

<sup>13</sup>C NMR (125 MHz, CDCl<sub>3</sub>)

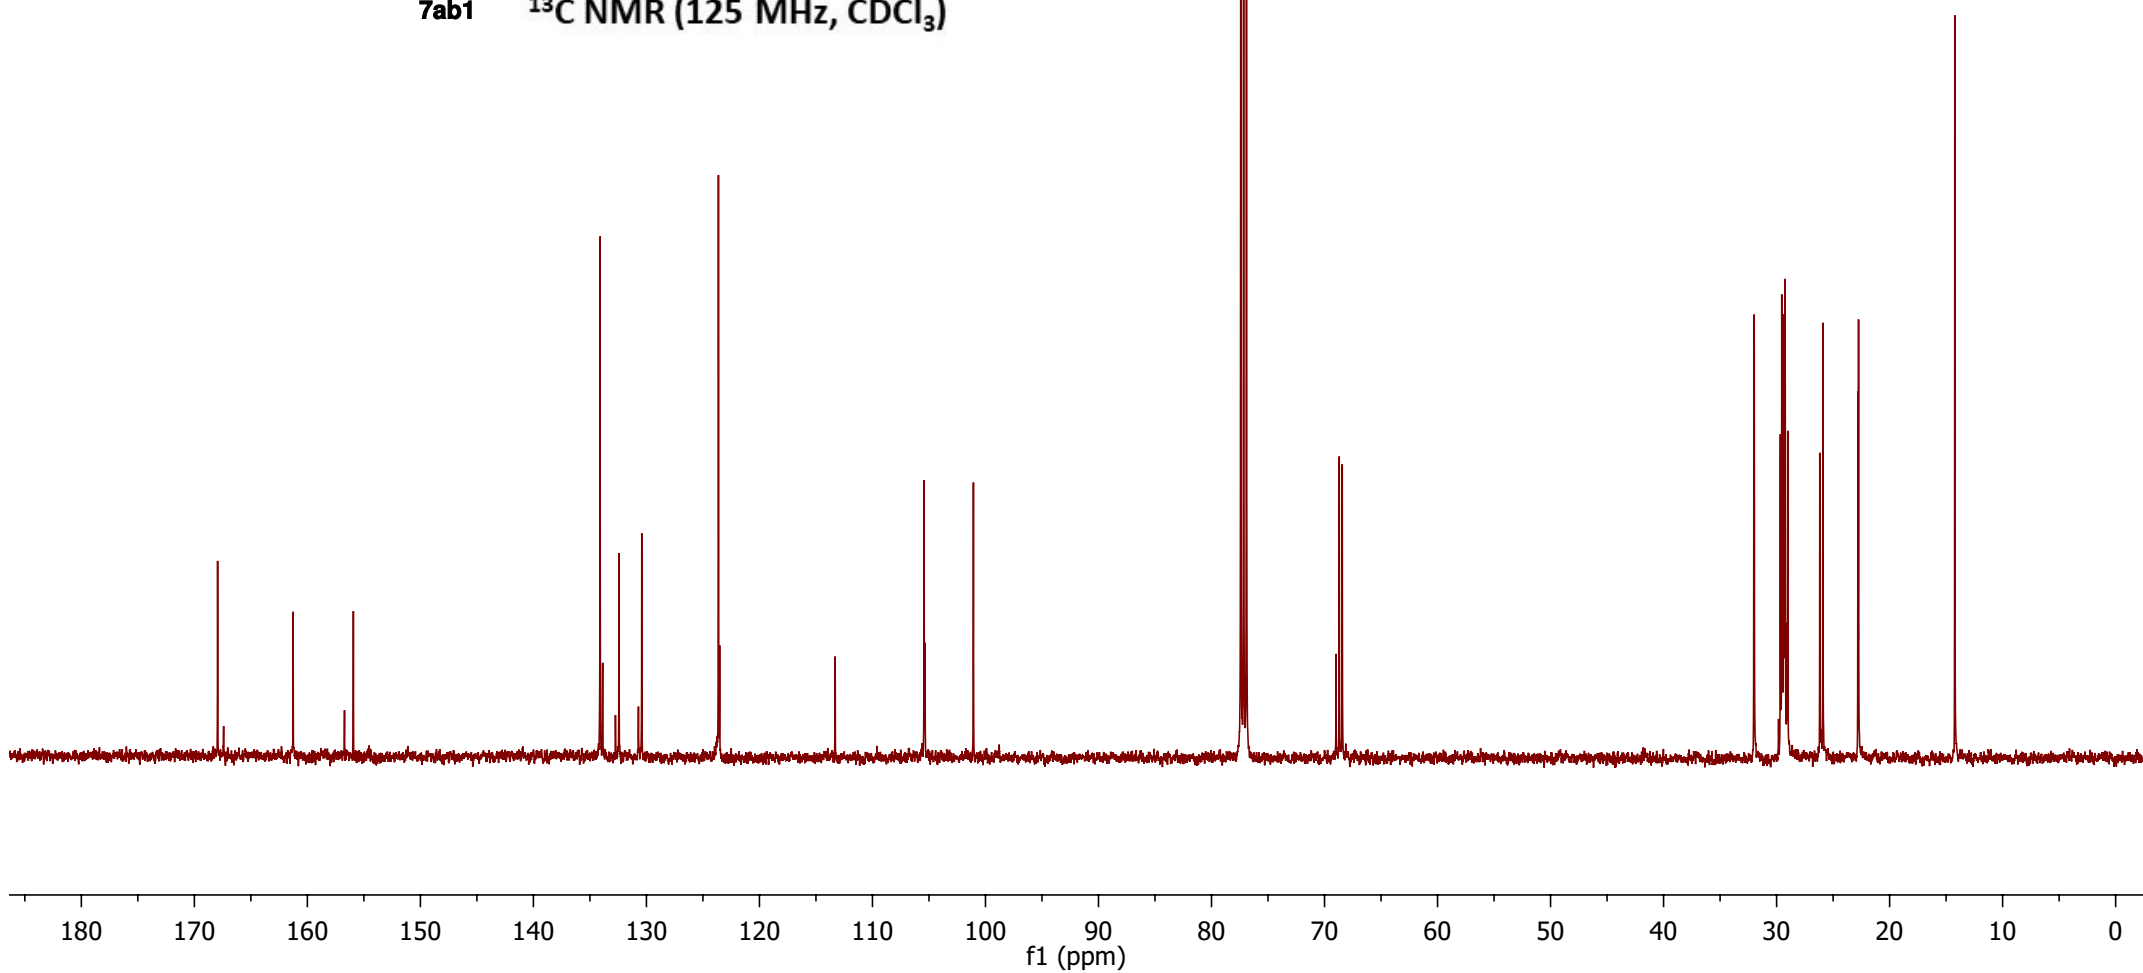

7.936  
7.930  
7.927  
7.921  
7.768  
7.760  
7.751

7.260  
7.142  
7.126

6.563  
6.547

3.986  
3.973  
3.961  
3.932  
3.919  
3.907

1.803  
1.789  
1.774  
1.606  
1.594  
1.579  
1.566  
1.472  
1.458  
1.443  
1.428  
1.355  
1.341  
1.298  
1.292  
1.252  
1.235  
1.222  
1.209  
1.192  
1.183  
1.154  
1.145  
1.131  
0.902  
0.890  
0.874  
0.859  
0.844

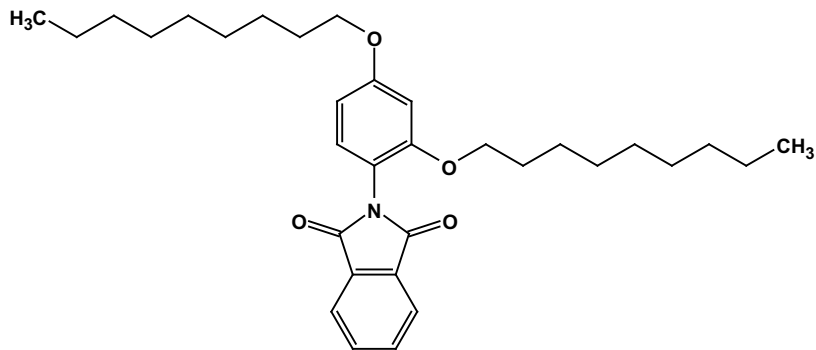

**7ab1**

<sup>1</sup>H NMR (500 MHz, CDCl<sub>3</sub>)

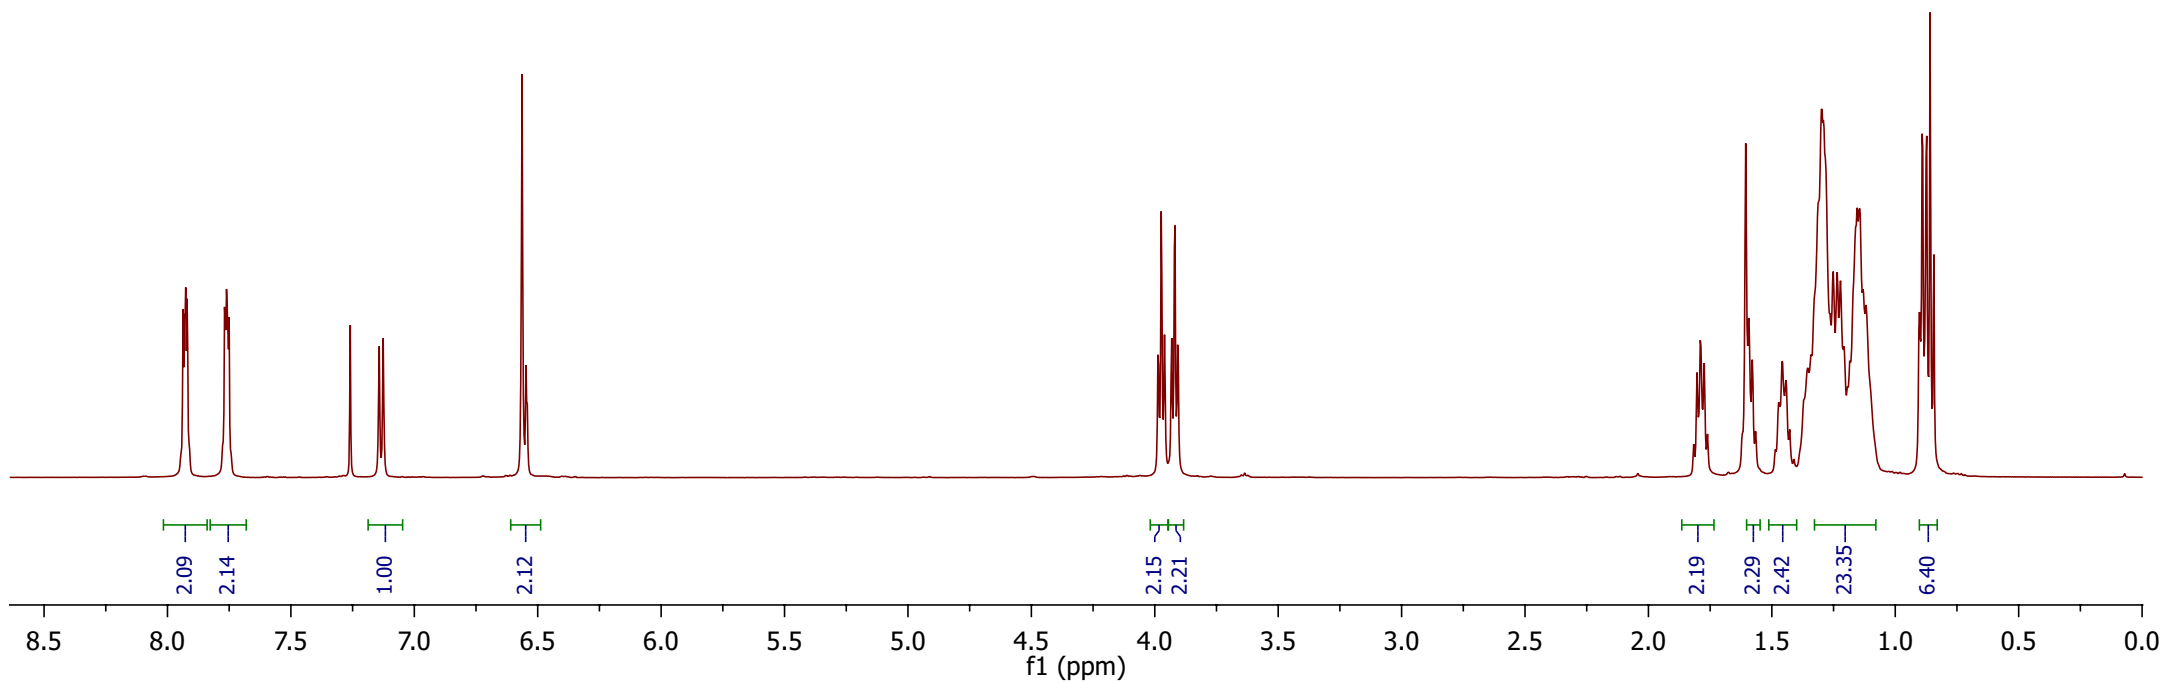

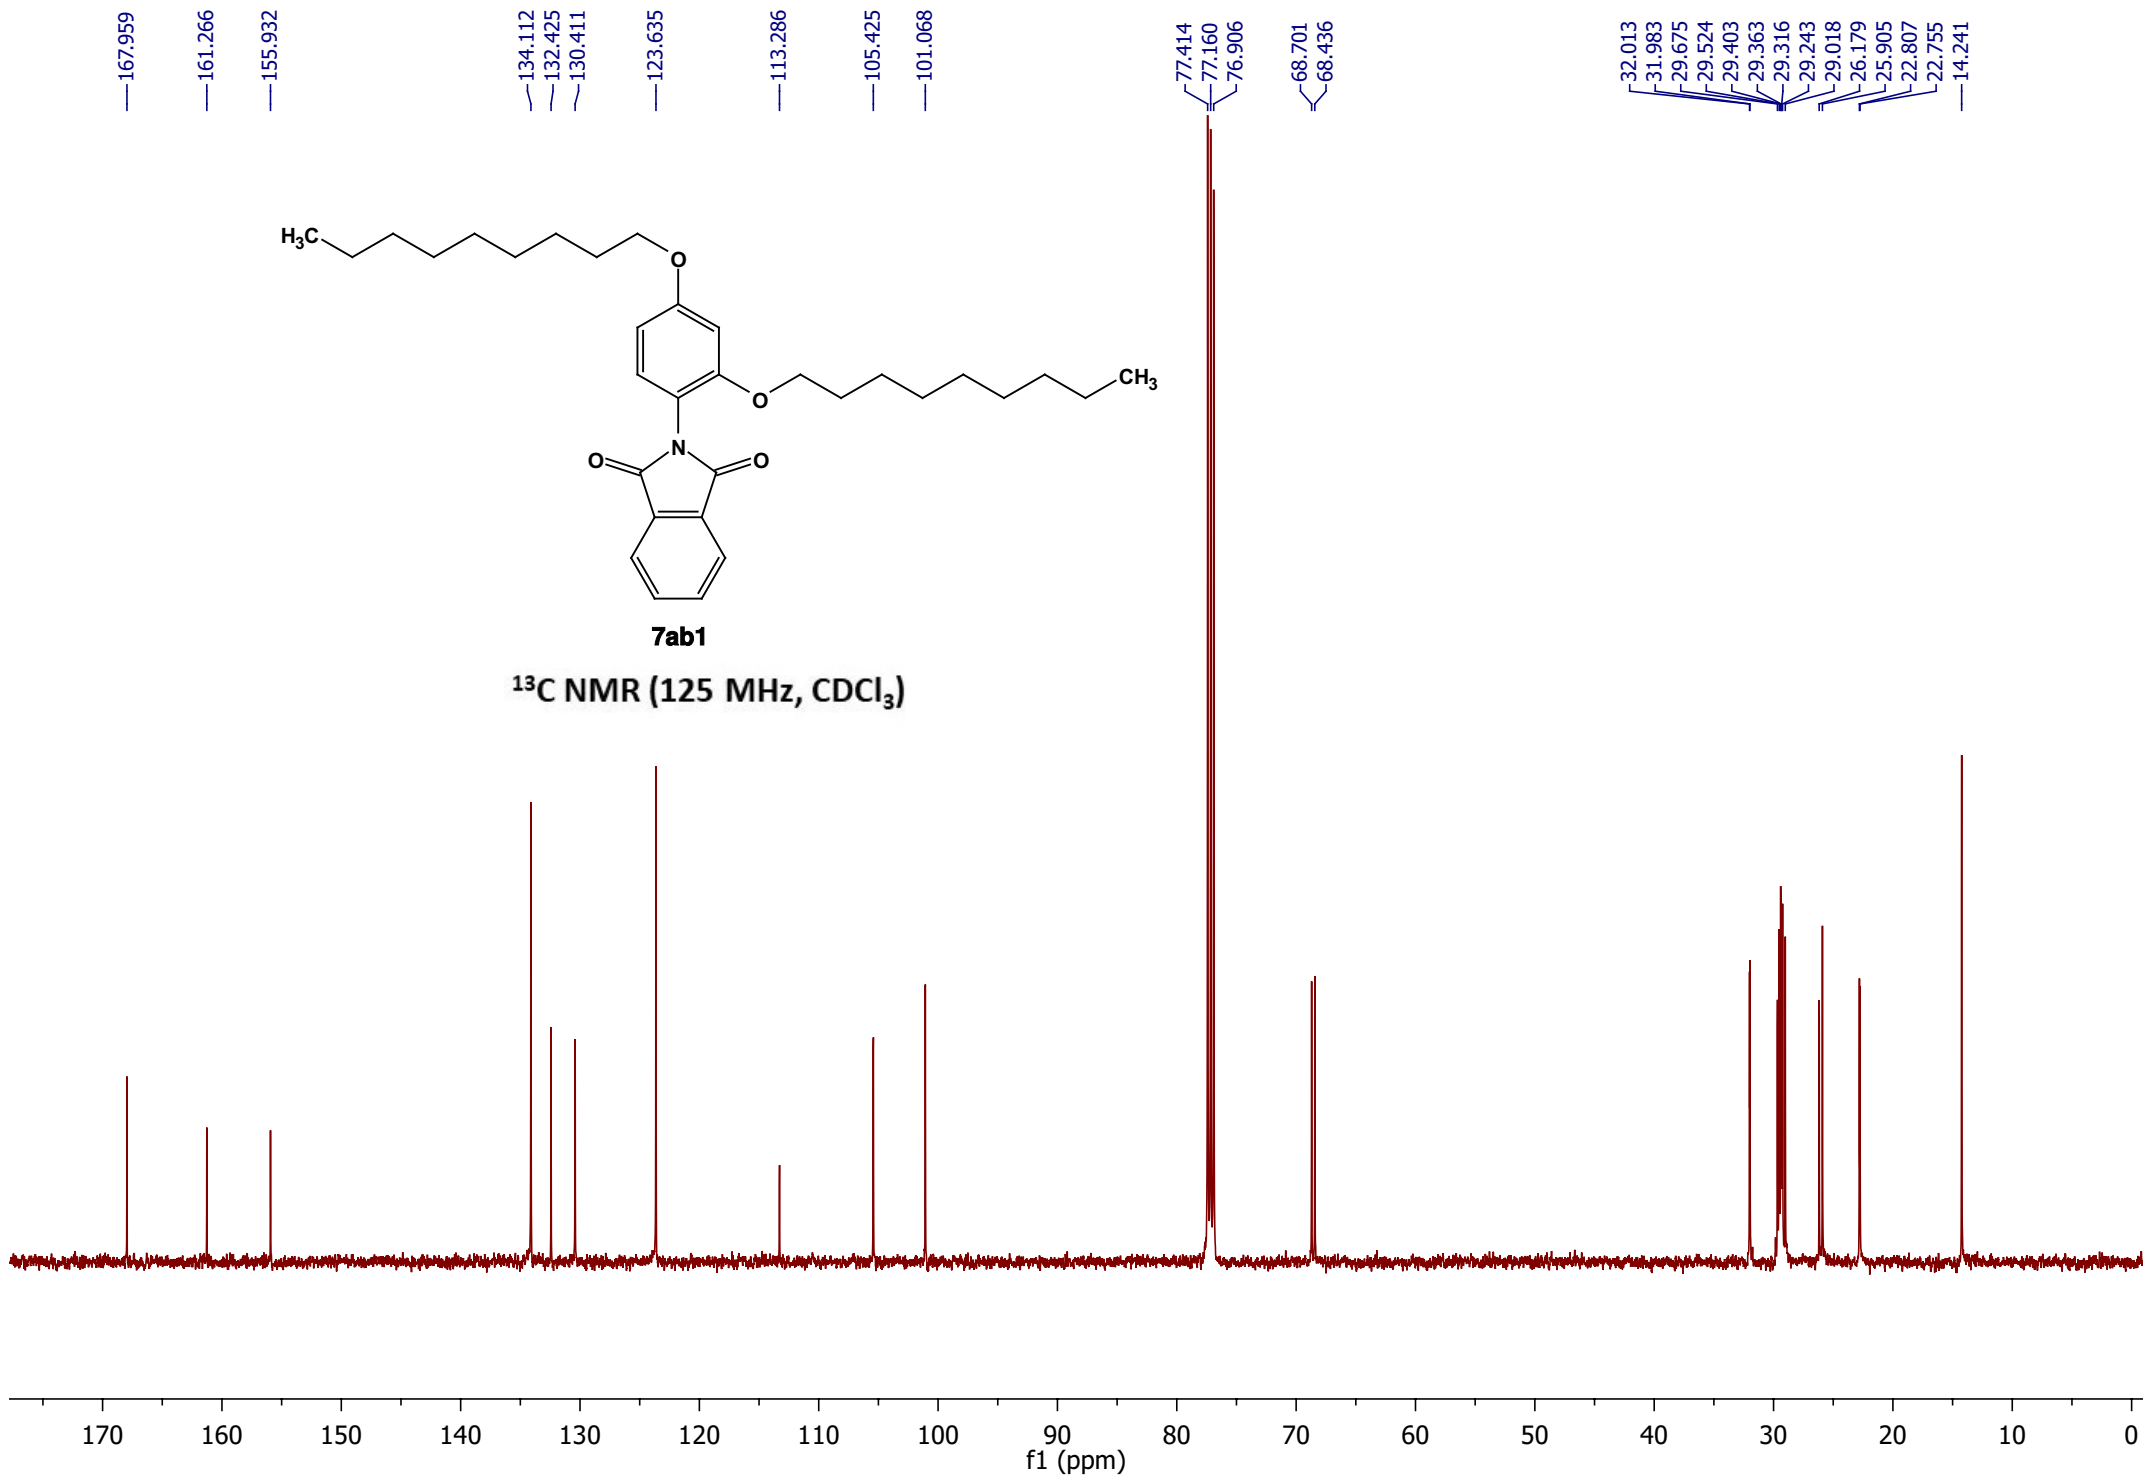

7.945  
7.937  
7.927  
7.921  
7.917  
7.911  
7.788  
7.780  
7.771  
7.762  
7.751  
7.745  
7.740  
7.735  
7.260

6.481  
6.463  
6.423

3.826  
3.753  
3.719

2.398

2.163

1.633

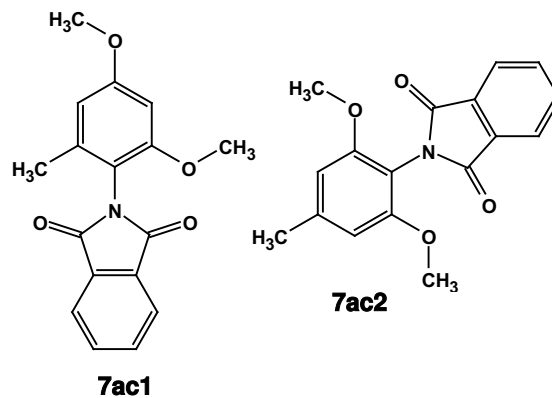

**7ac1 : 7ac2 = 9.3:1**  
Isomeric distribution was measured by  
the integration of the -Me signals

<sup>1</sup>H NMR (500 MHz, CDCl<sub>3</sub>)

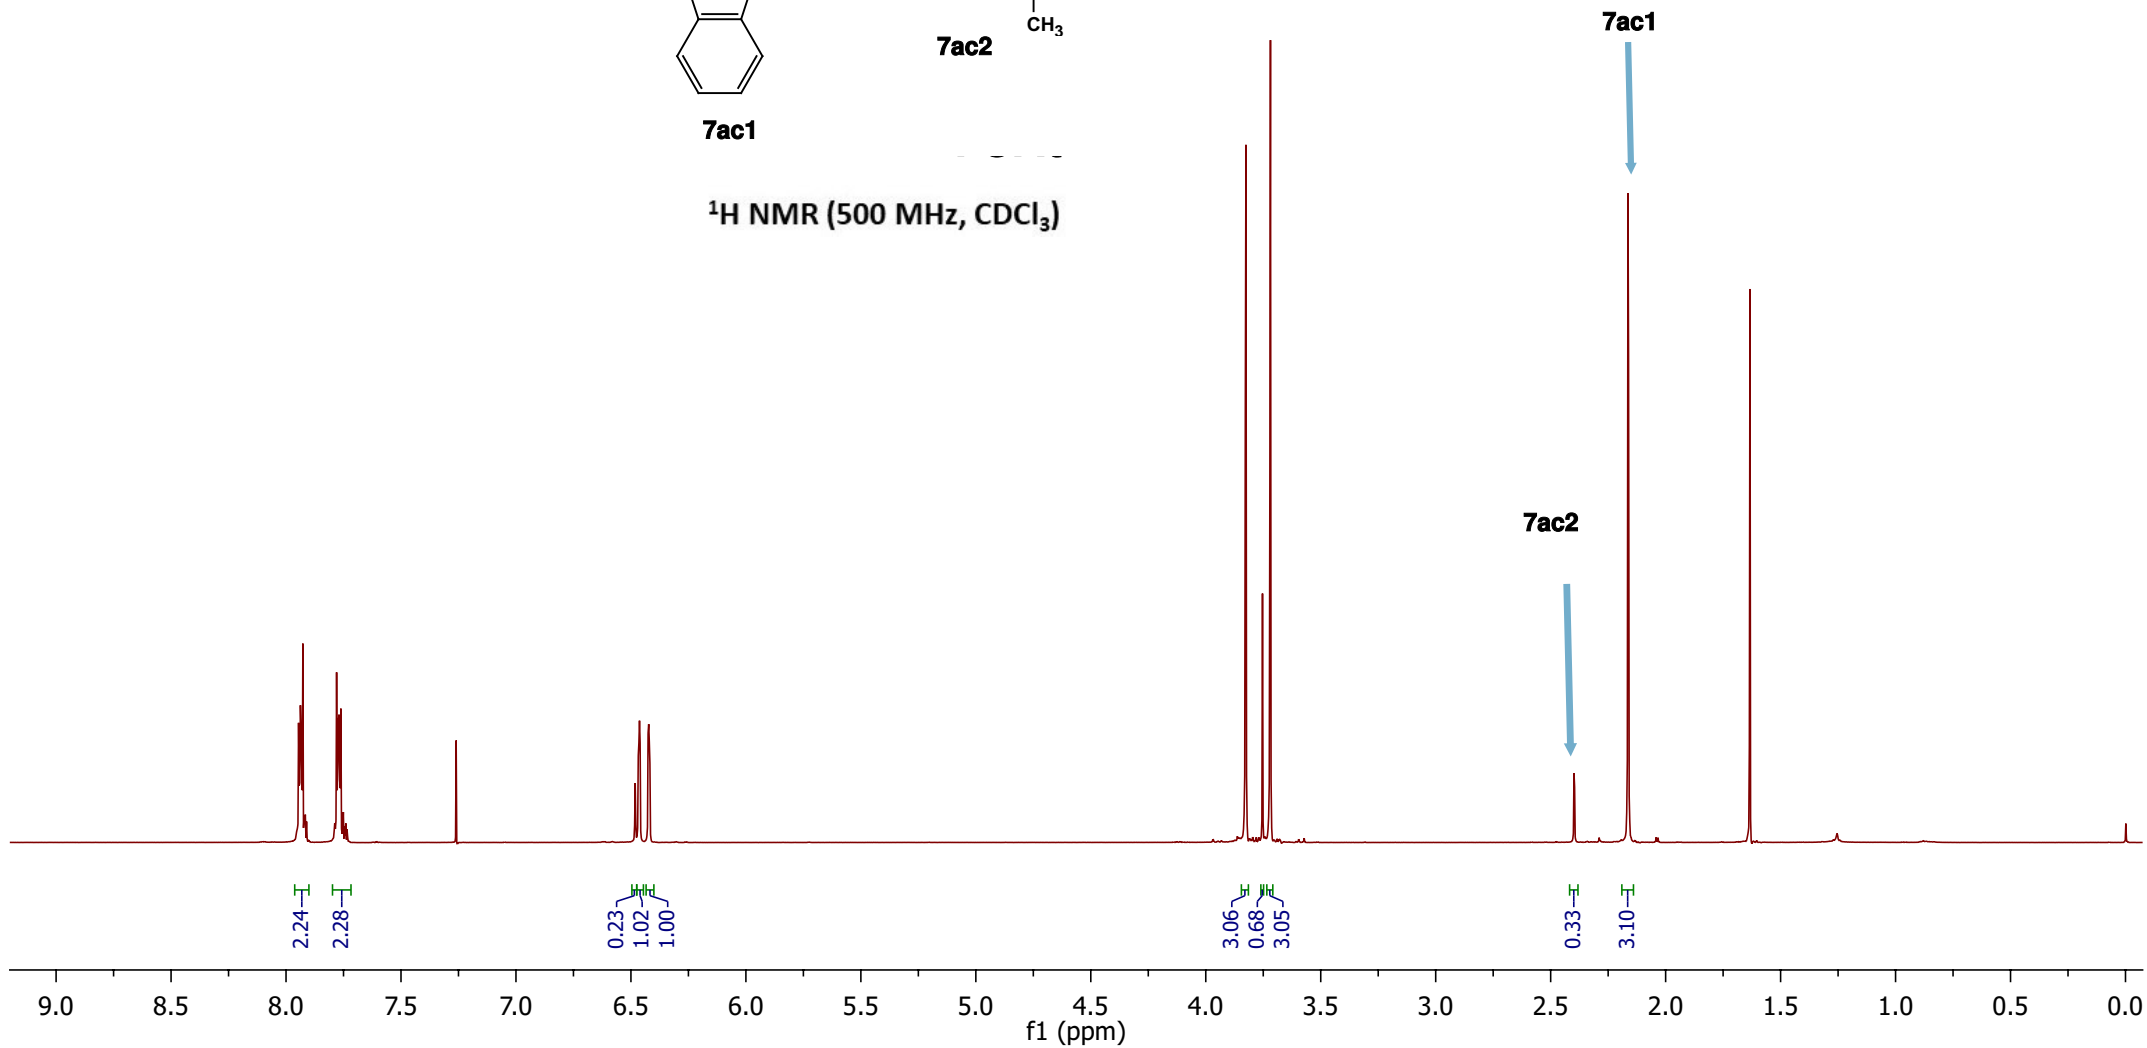

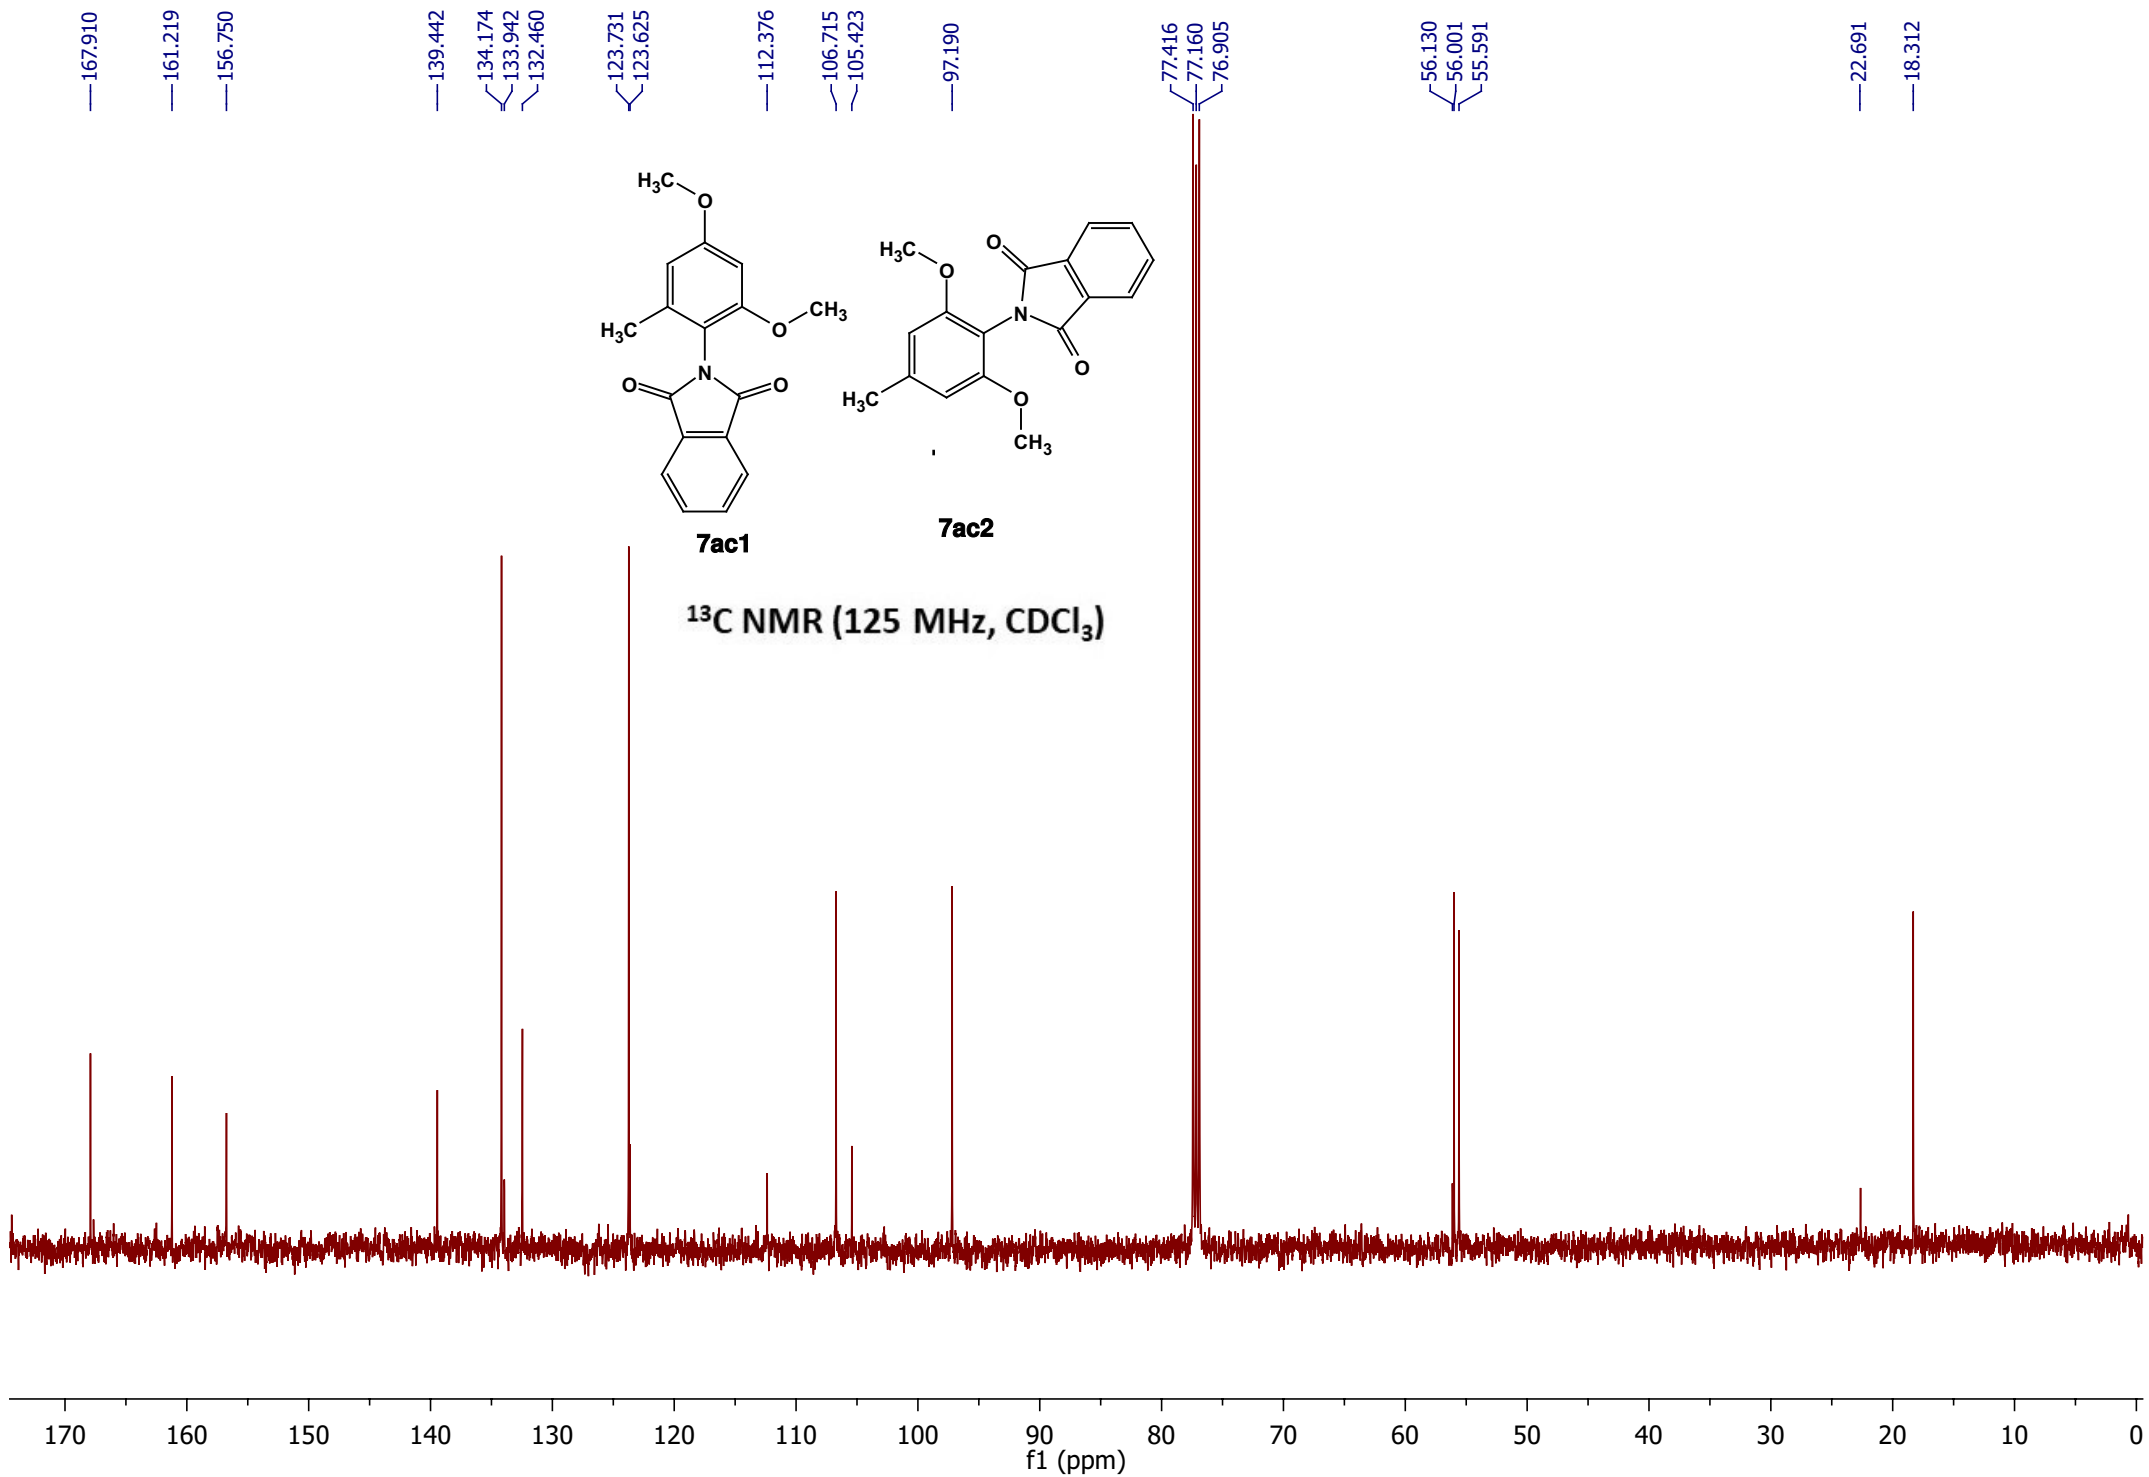



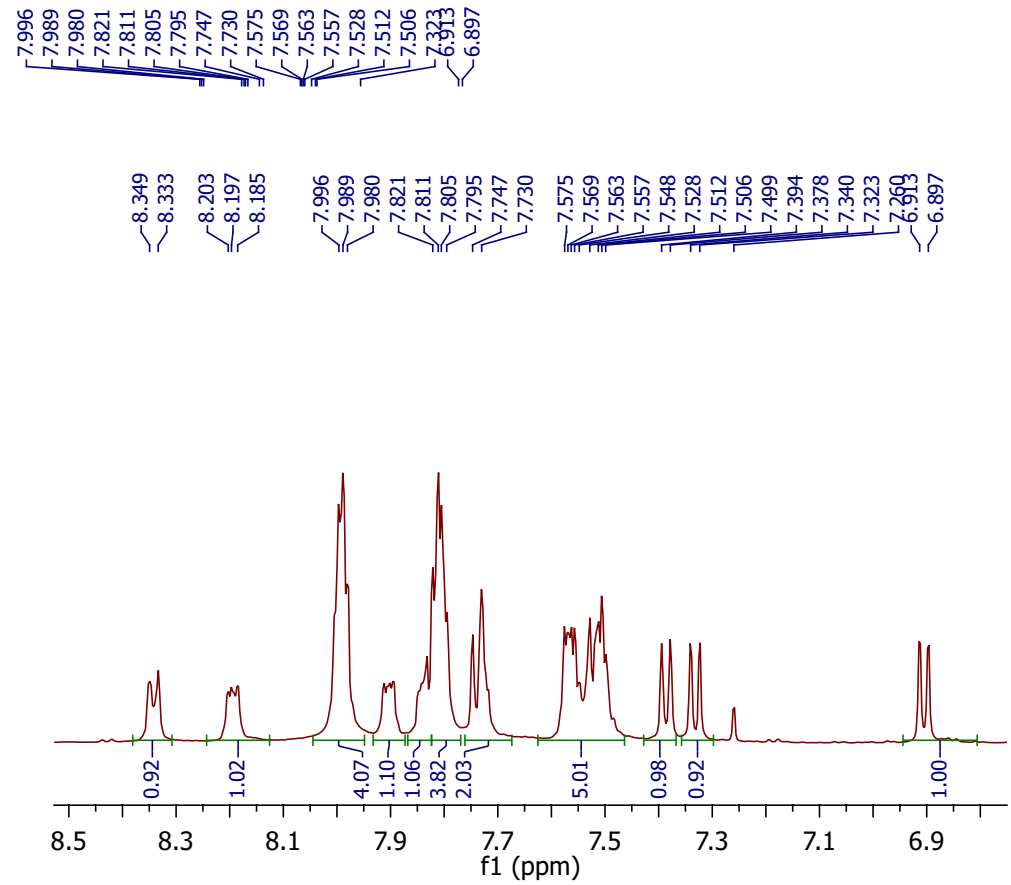

4.043  
3.883

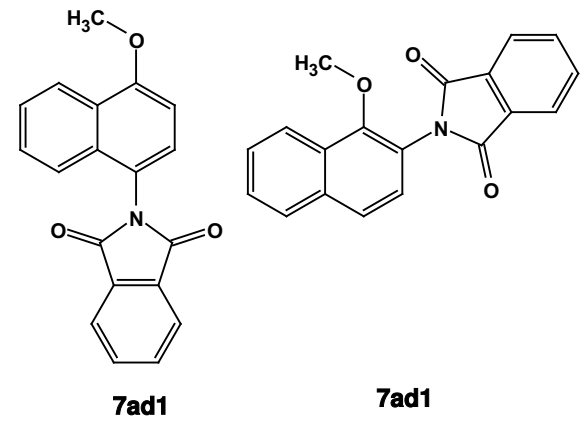

<sup>1</sup>H NMR (500 MHz, CDCl<sub>3</sub>)

**7ad1 : 7ad2 = 1:1**  
**Isomeric distribution was measured by the integration of the -OMe signals**

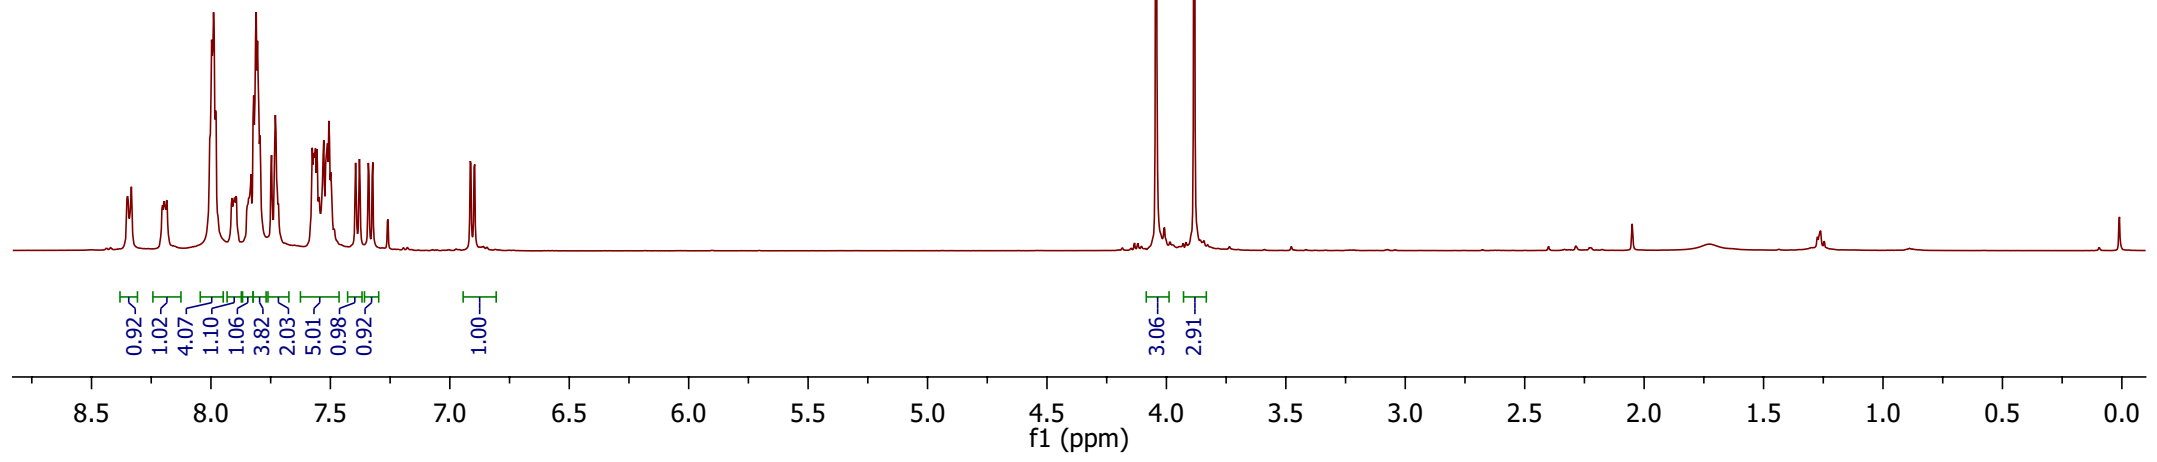

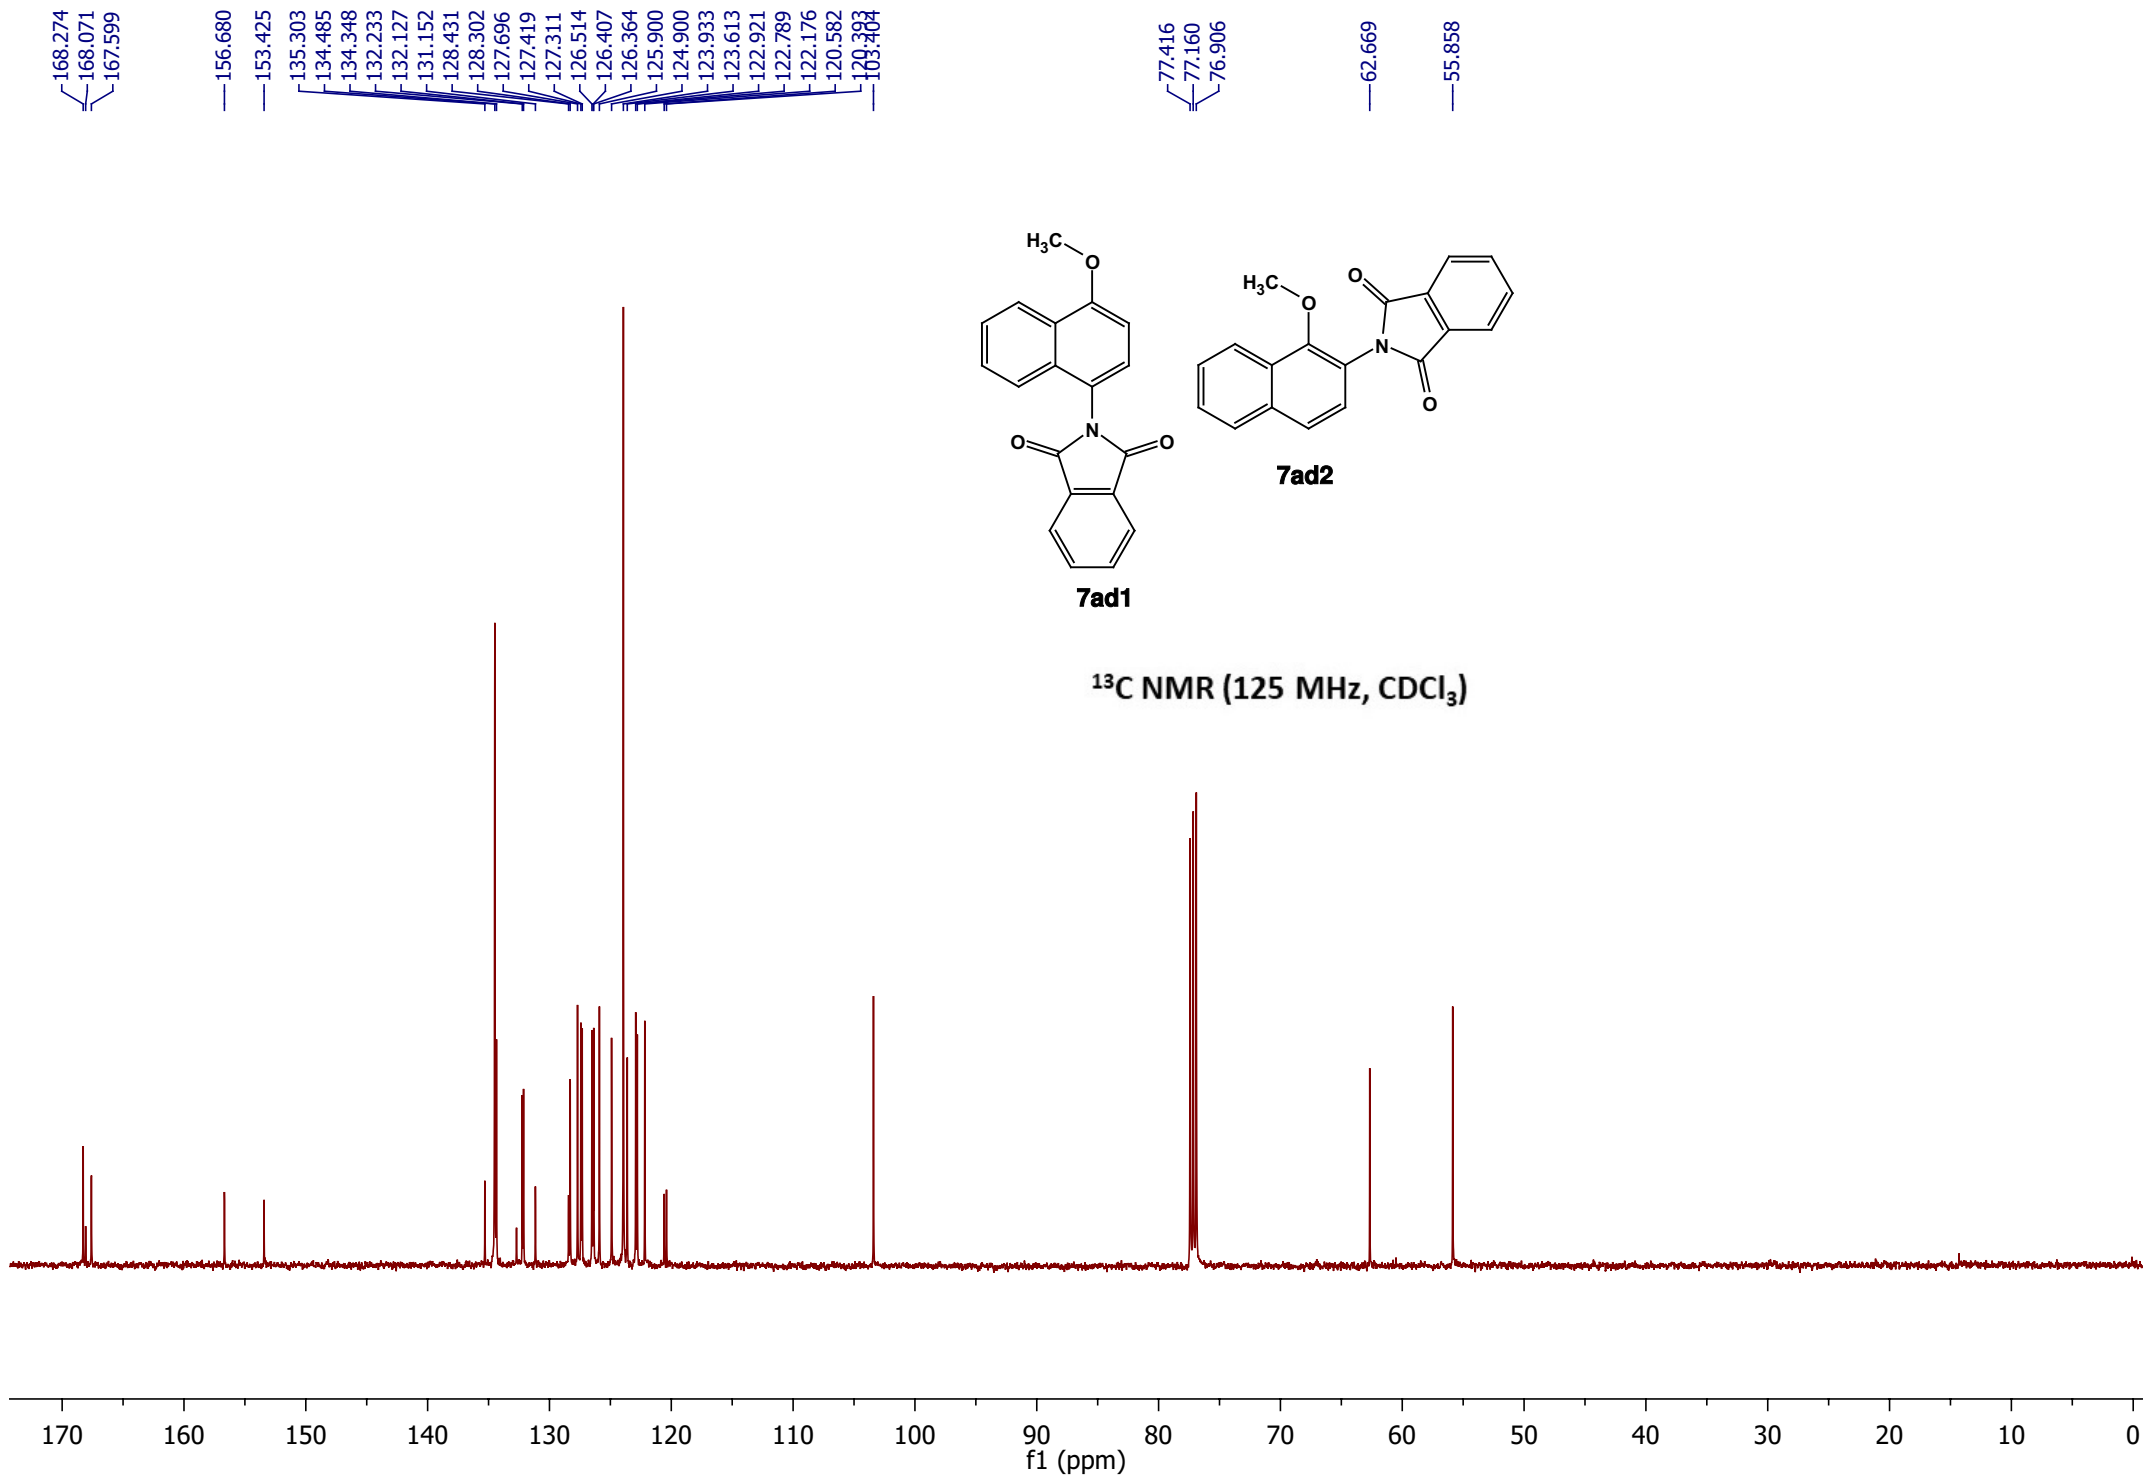

168.274  
168.071  
167.599

156.680

153.425

135.303  
134.485  
134.348  
132.704  
132.233  
132.127  
131.152

128.302  
127.696  
127.419  
127.311  
126.514  
126.364  
125.900  
124.900  
123.933  
123.613  
122.921  
122.789  
120.582  
120.393

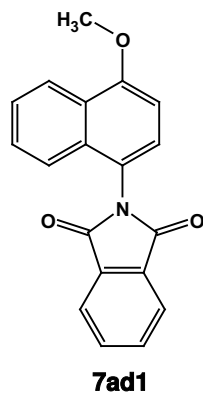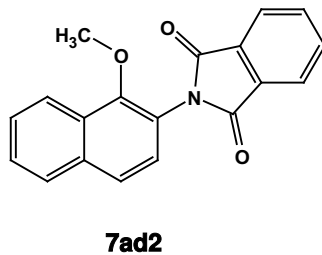

<sup>13</sup>C NMR (125 MHz, CDCl<sub>3</sub>)

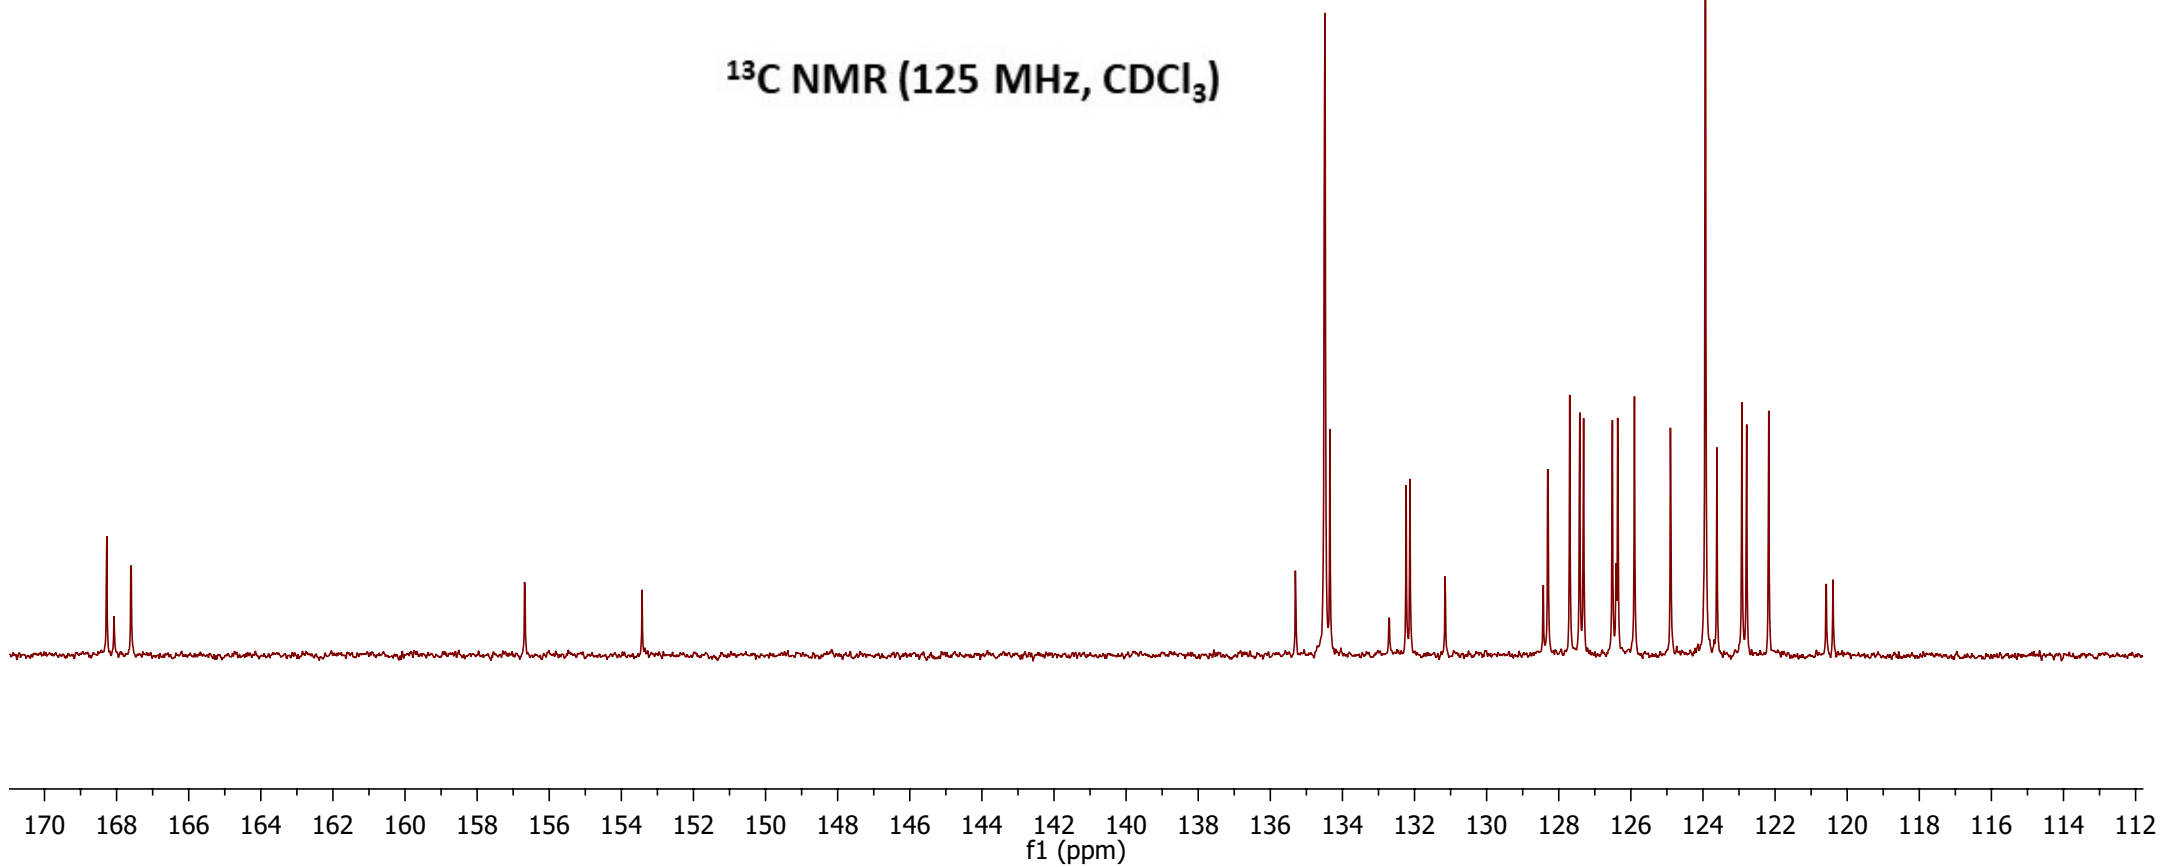

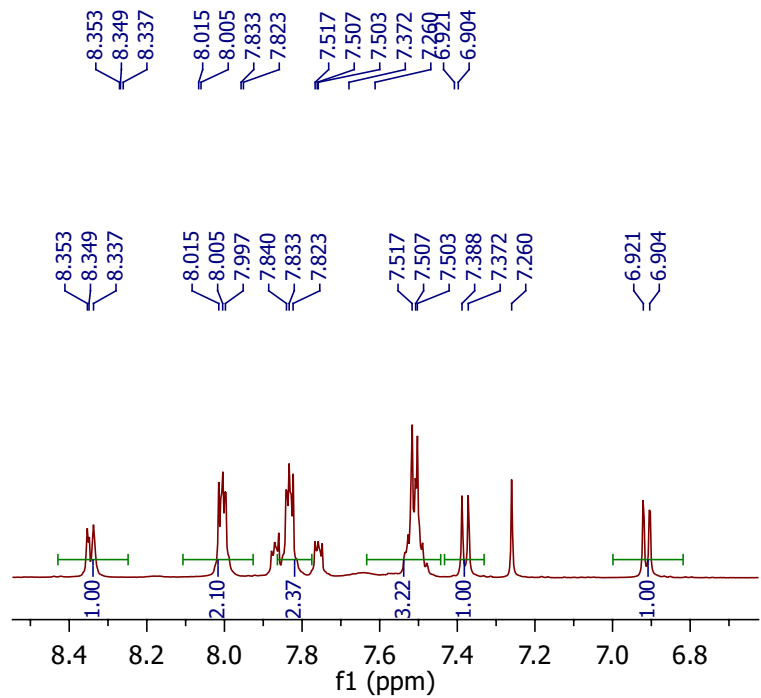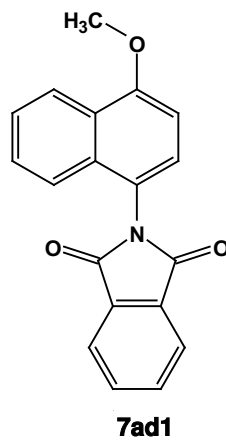

<sup>1</sup>H NMR (500 MHz, CDCl<sub>3</sub>)

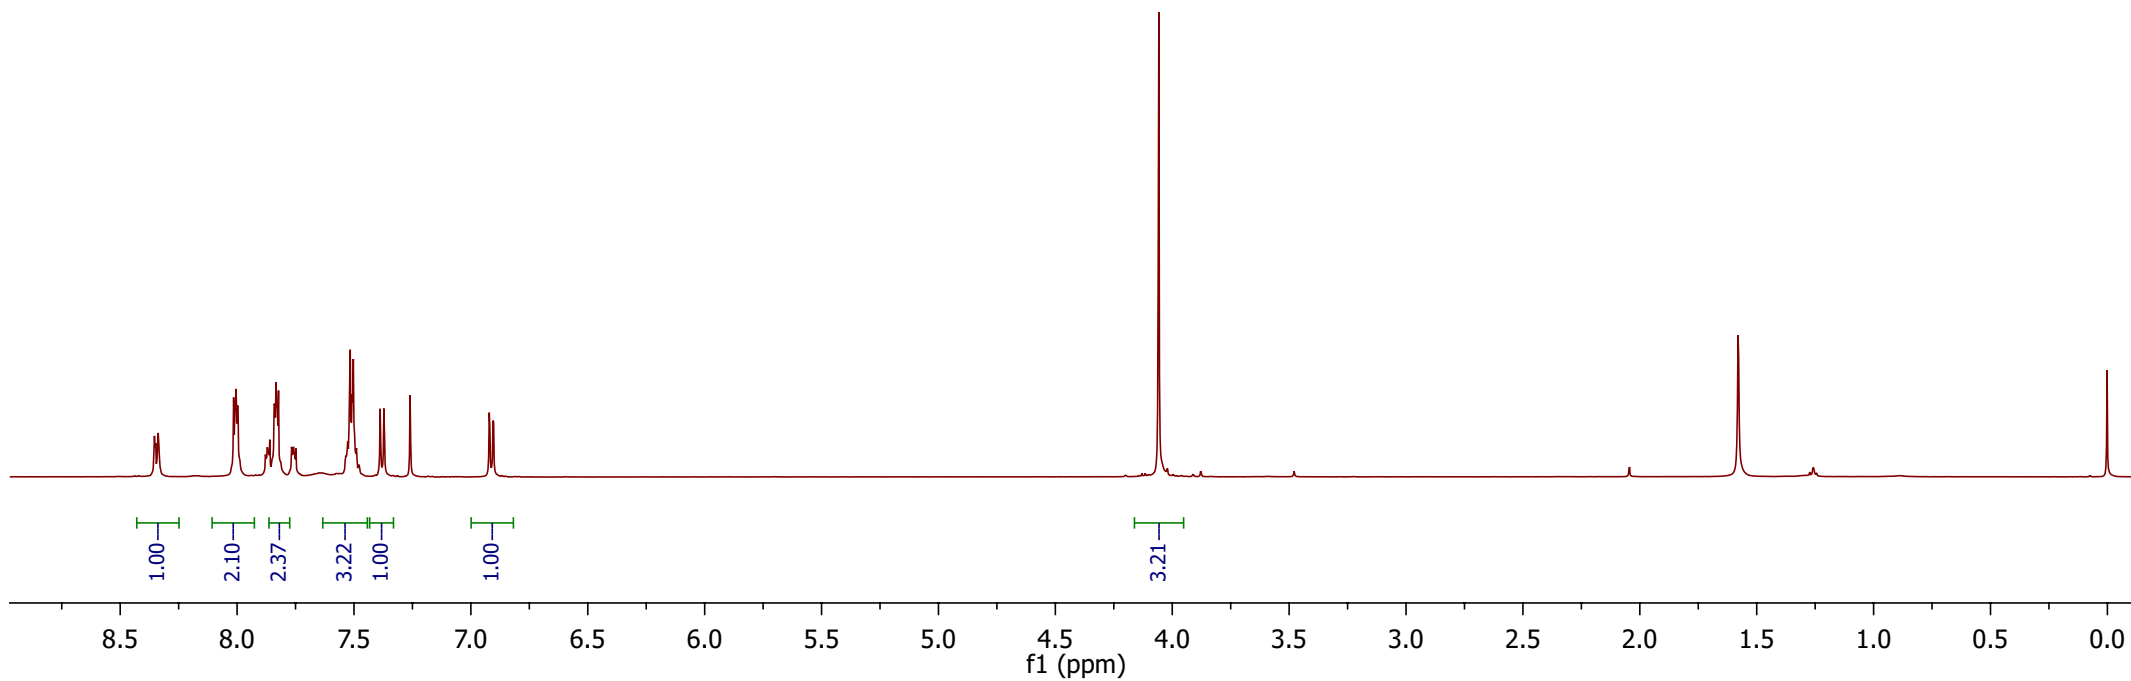

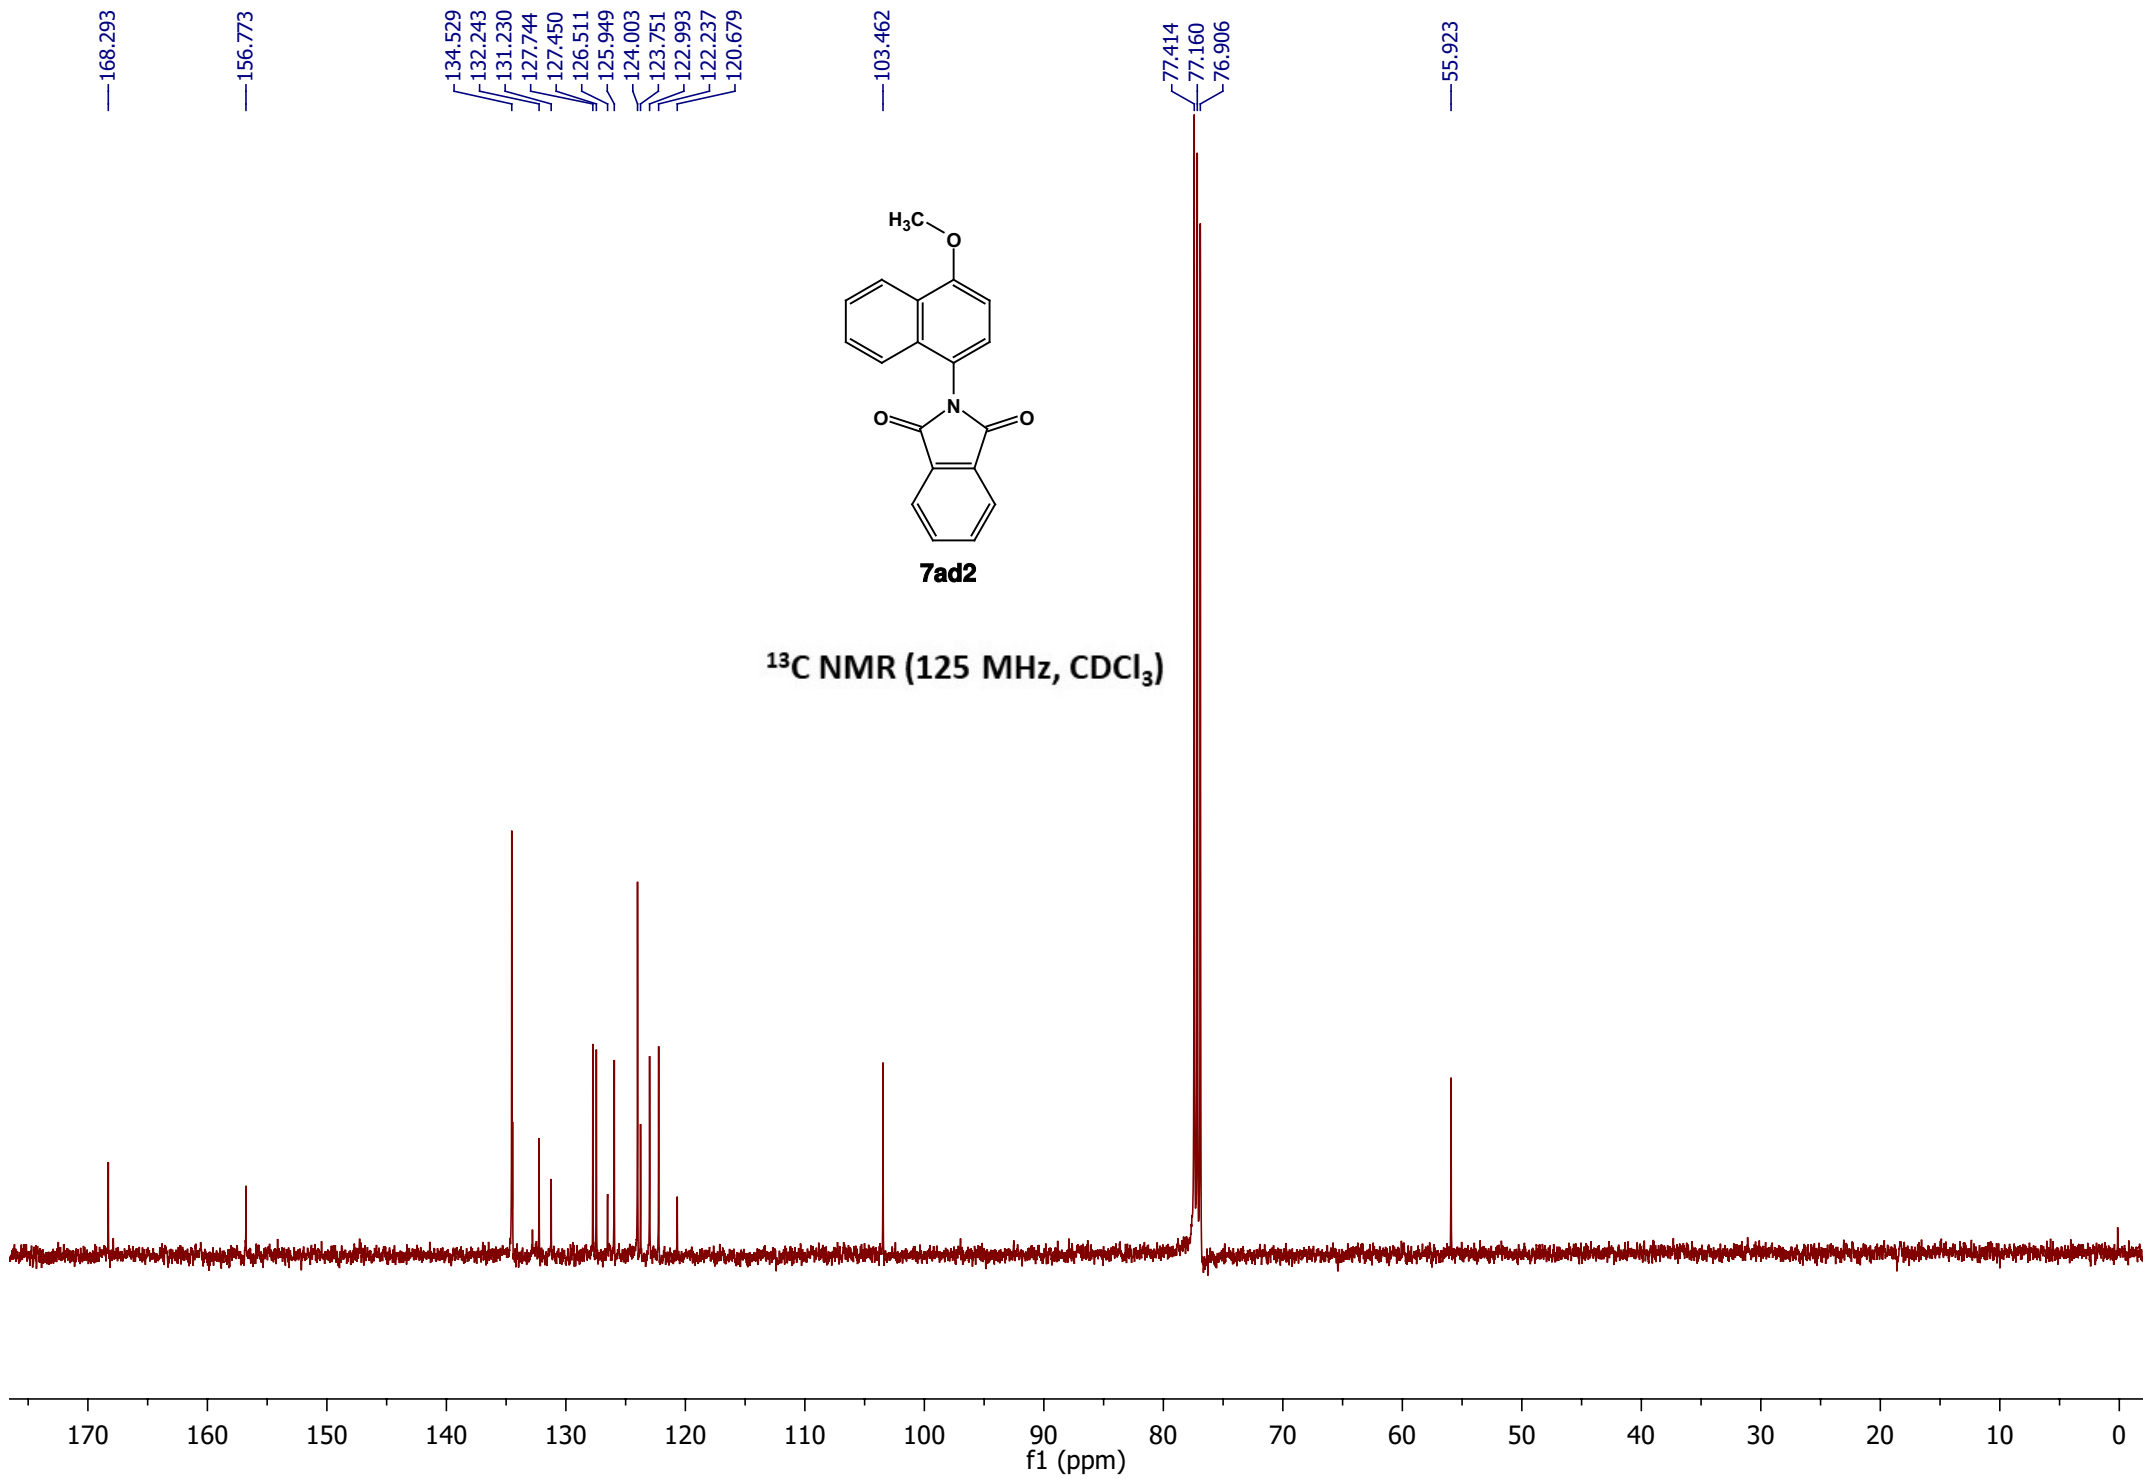

8.255  
8.240  
7.829  
7.824  
7.811  
7.518  
7.505  
7.495  
7.479  
7.466  
7.260  
7.256  
6.725  
6.709  
6.682  
6.666

3.944

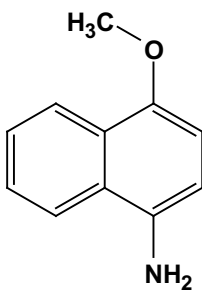

4-methoxynaphthalen-1-amine

<sup>1</sup>H NMR (500 MHz, CDCl<sub>3</sub>)

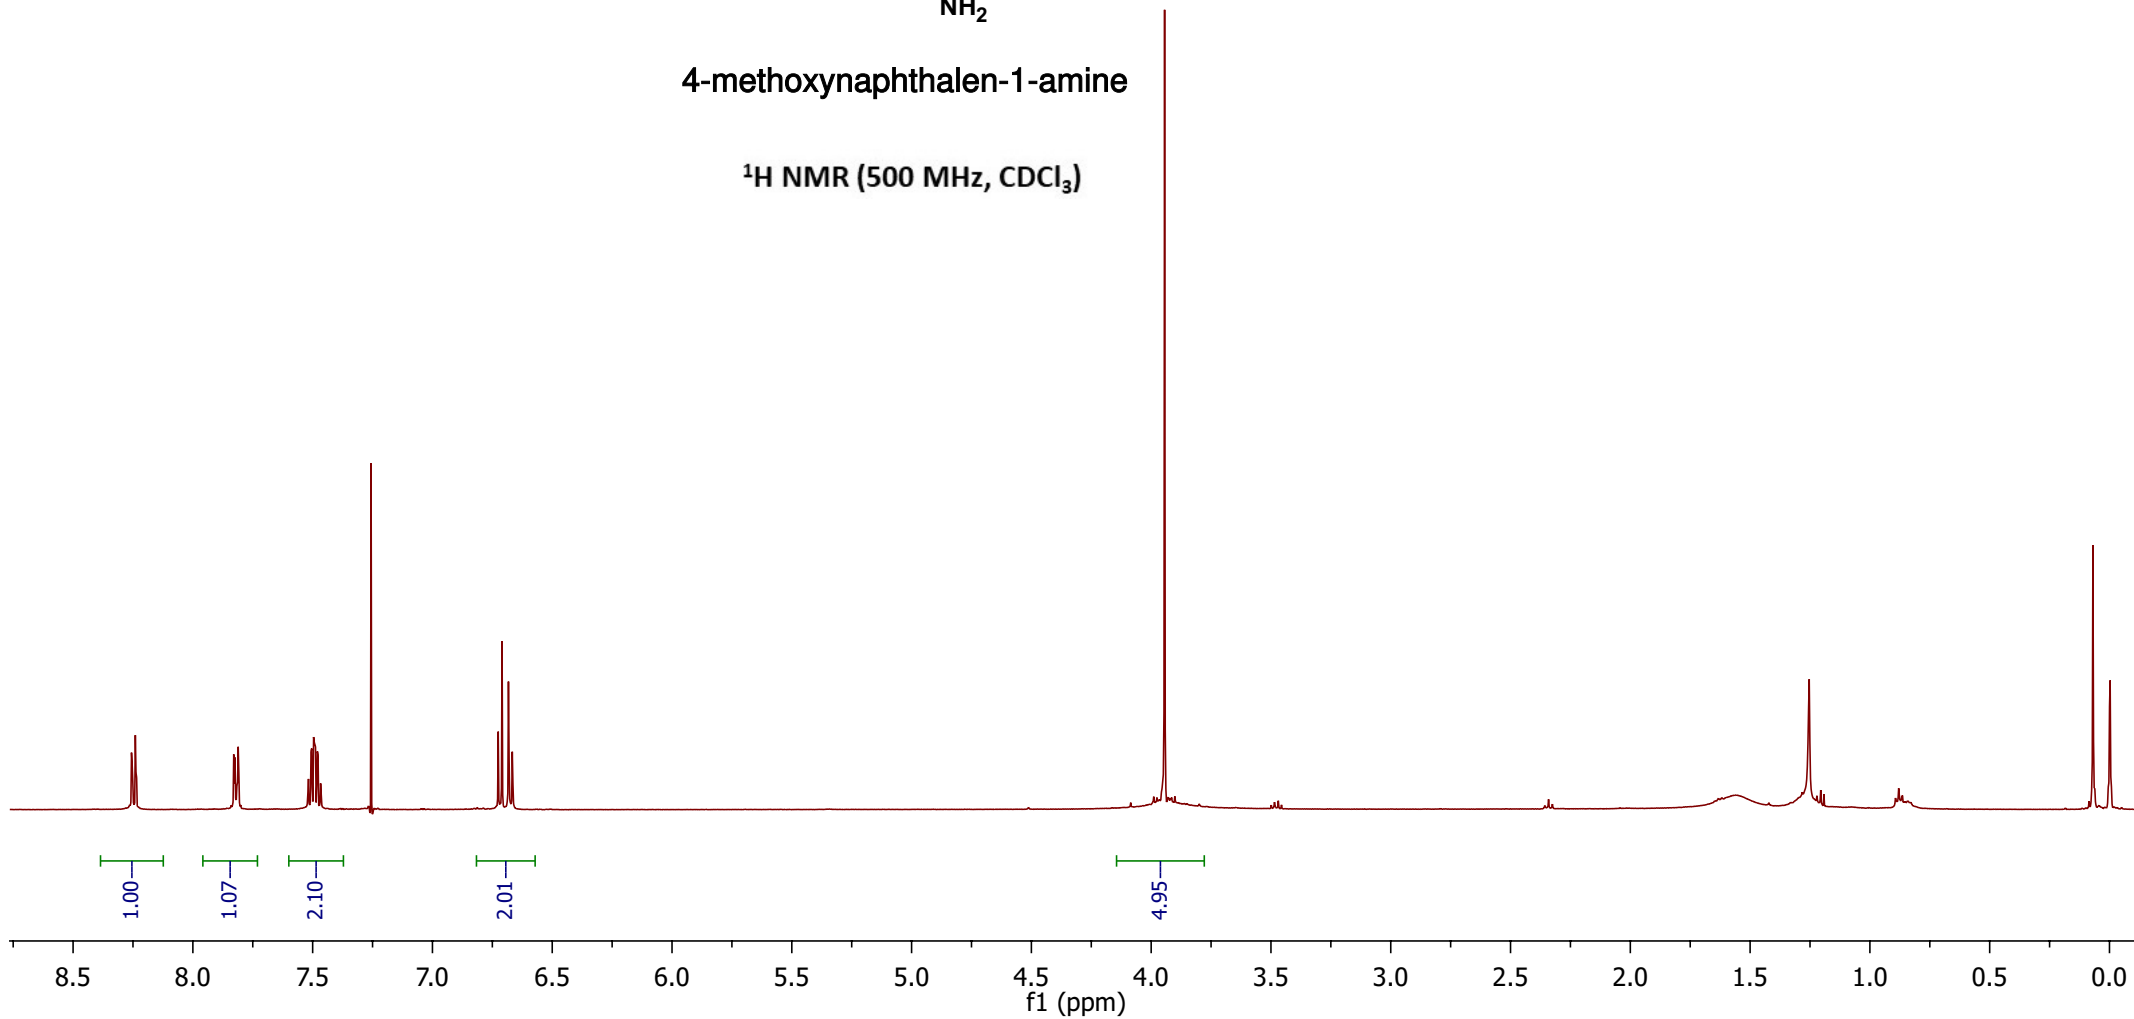

8.201  
8.194  
8.188  
8.183  
8.175  
8.015  
8.007  
8.001  
7.996  
7.991  
7.983  
7.926  
7.919  
7.913  
7.907  
7.901  
7.895  
7.881  
7.825  
7.821  
7.815  
7.749  
7.732  
7.588  
7.580  
7.574  
7.567  
7.562  
7.554  
7.330  
7.313  
7.260

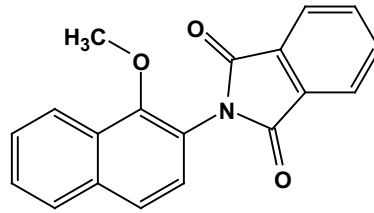

**7ad2**

<sup>1</sup>H NMR (500 MHz, CDCl<sub>3</sub>)

3.876

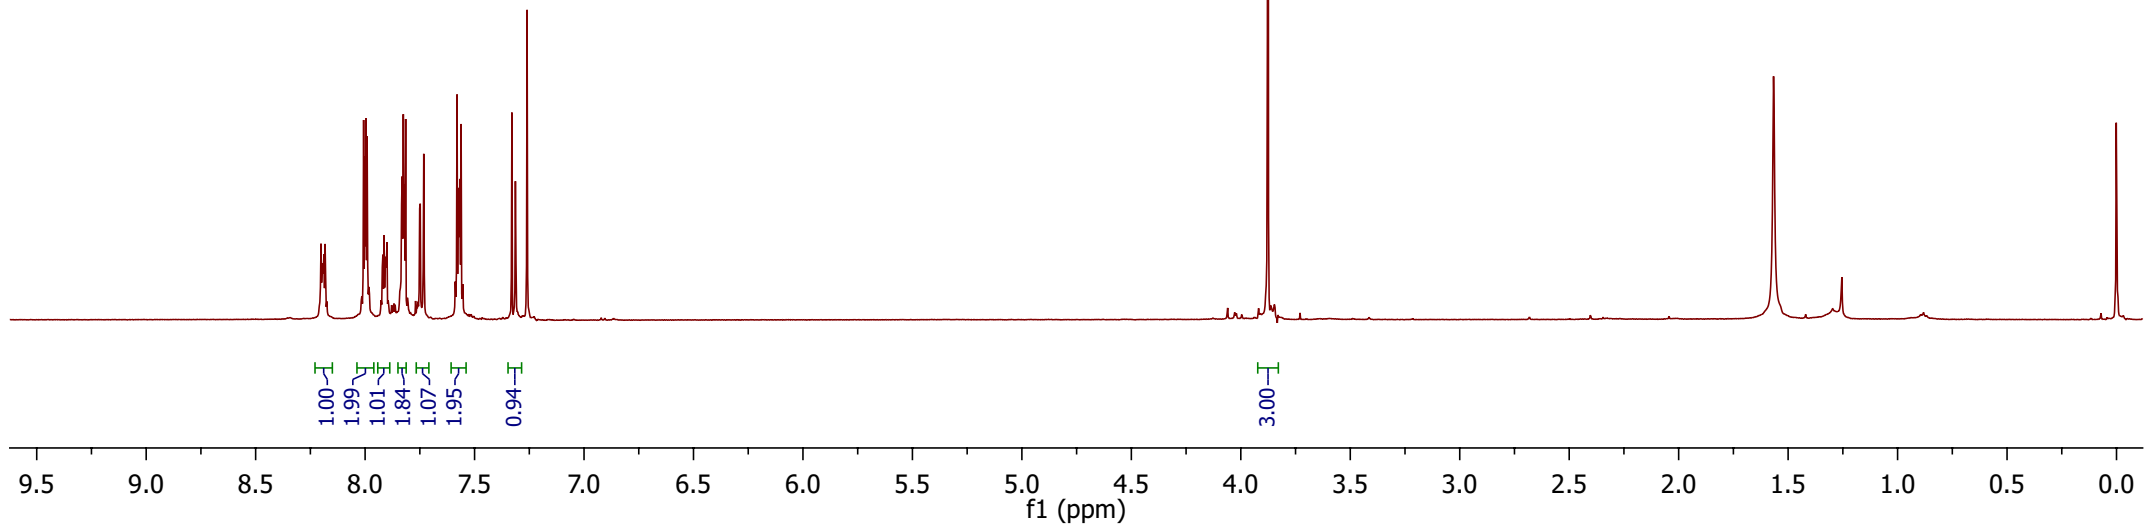

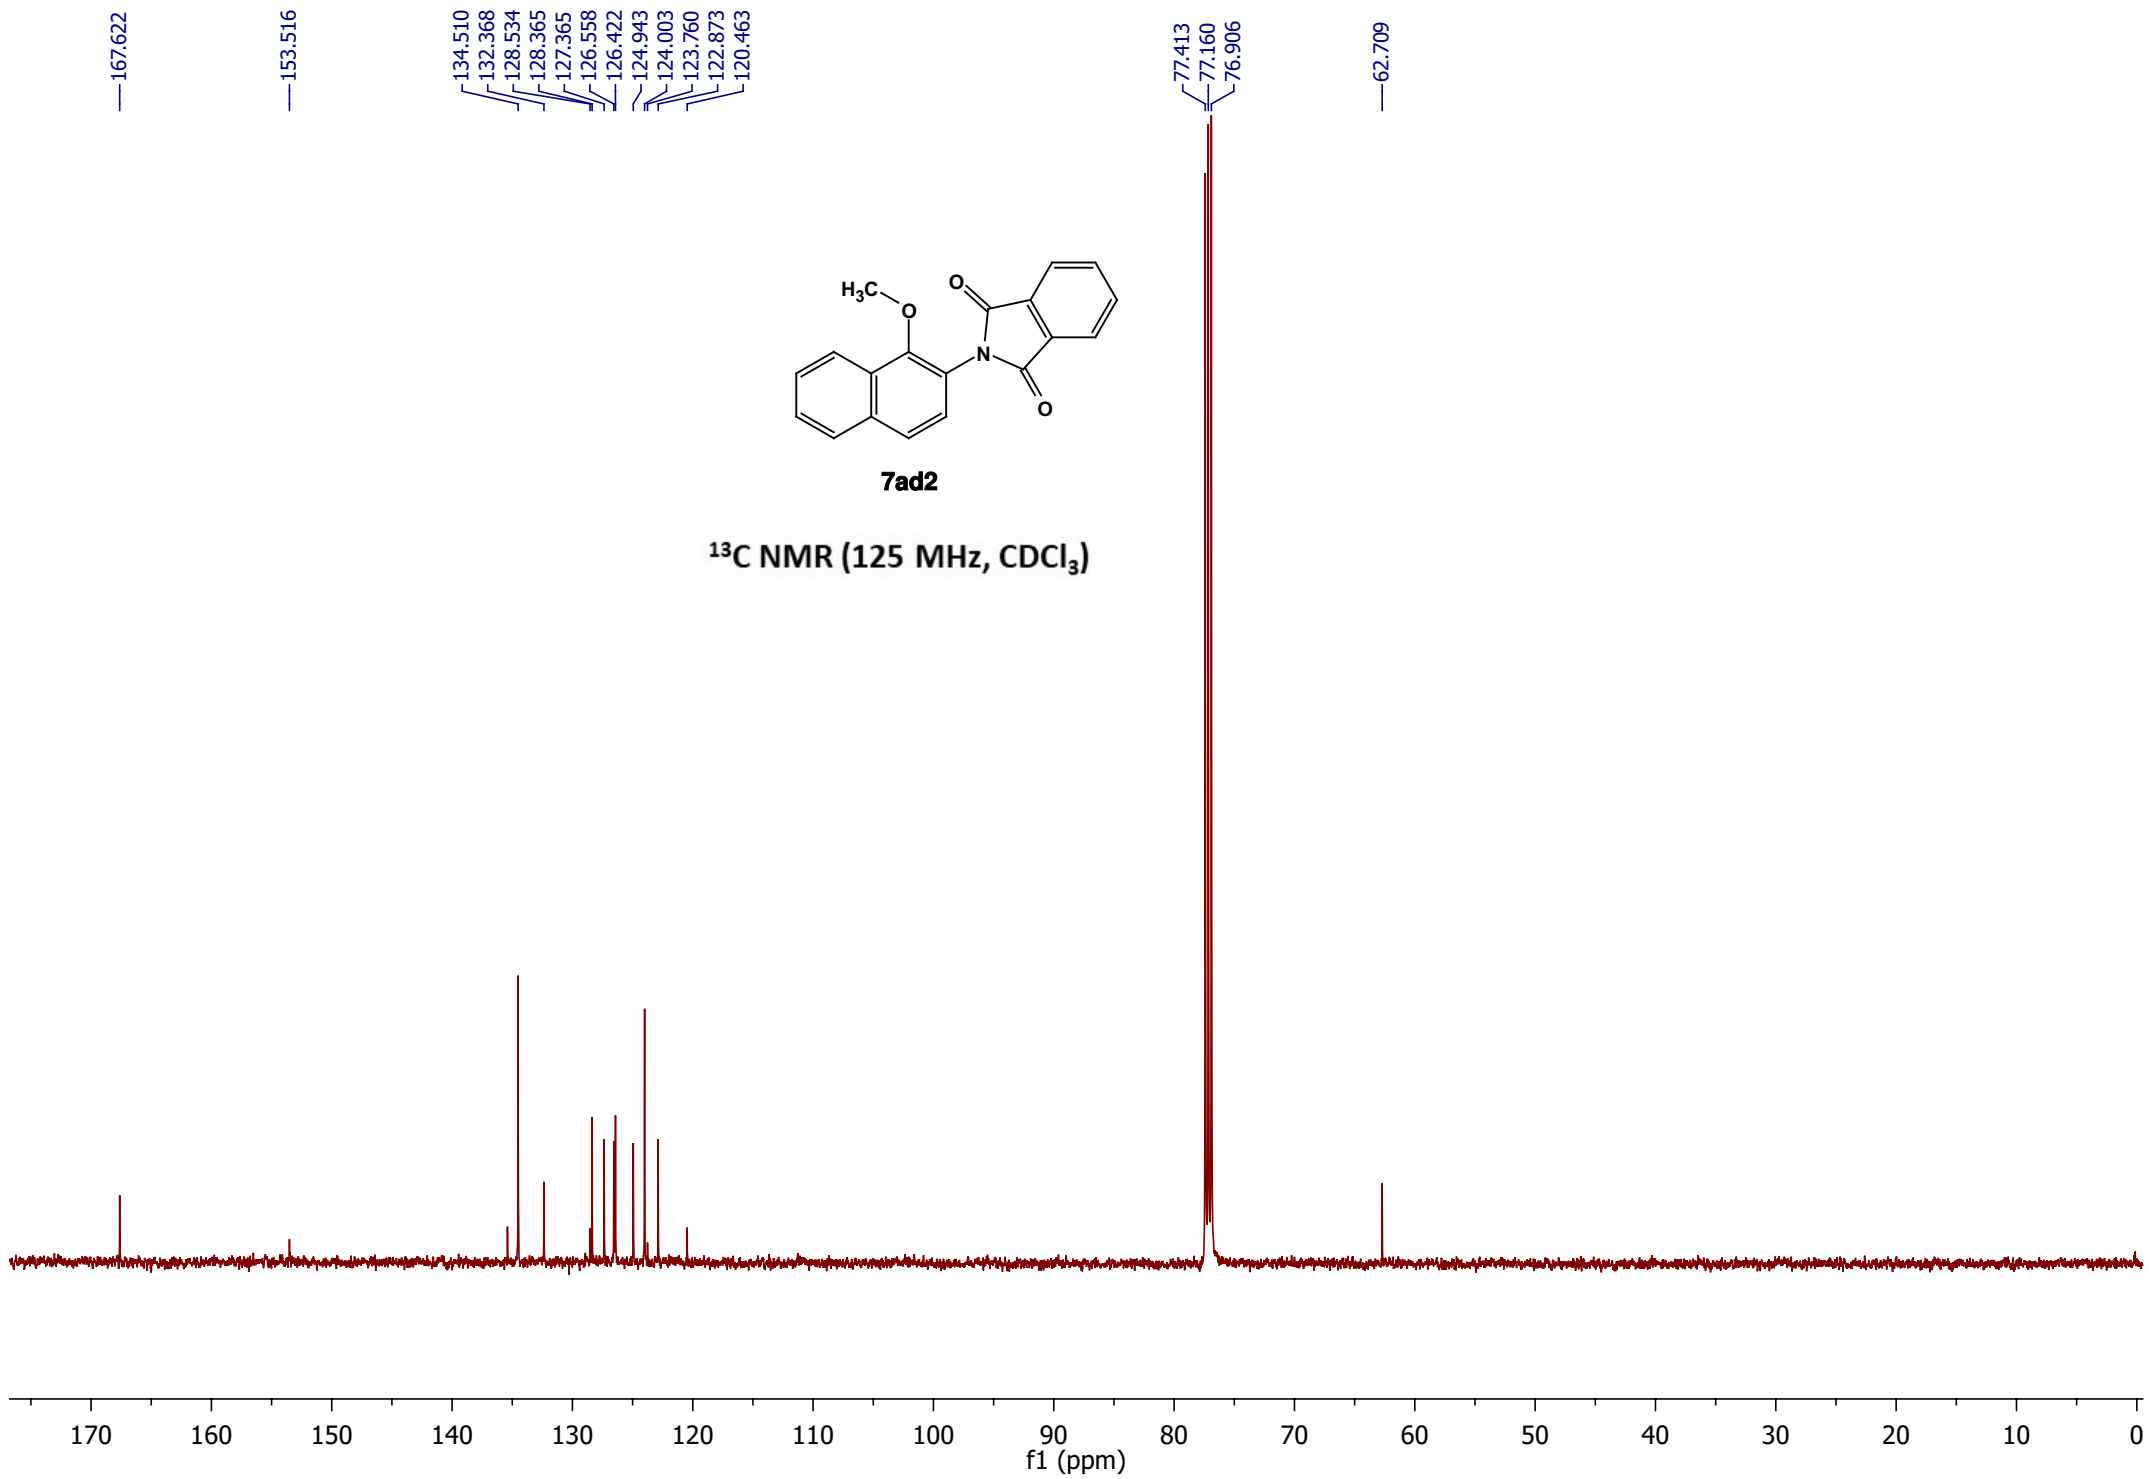



7.949  
7.942  
7.939  
7.932  
7.782  
7.773  
7.765

7.260

6.982

6.833

3.785  
3.750

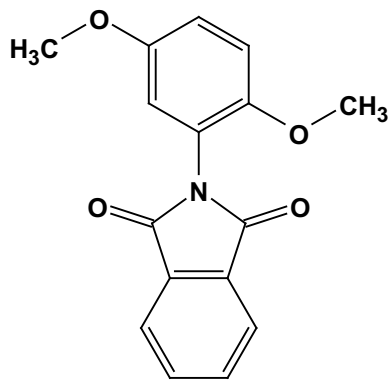

7ae1

<sup>1</sup>H NMR (500 MHz, CDCl<sub>3</sub>)

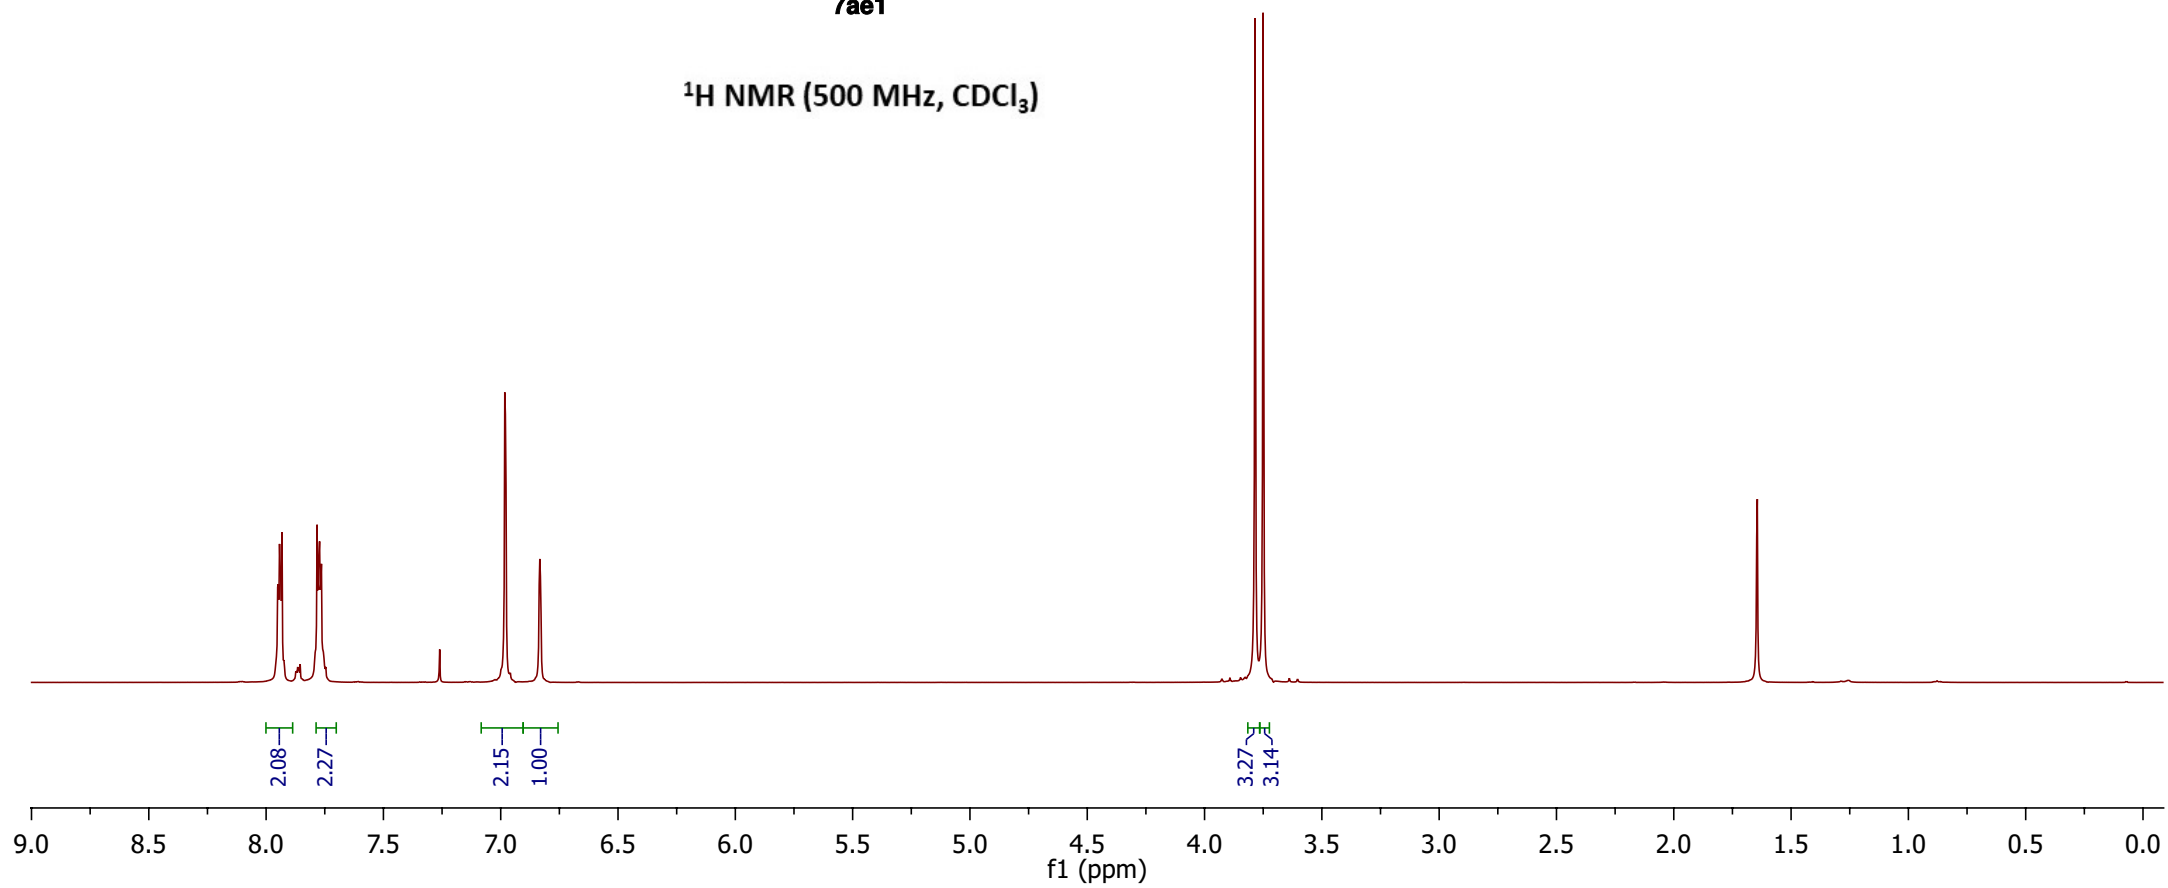

—167.450

—153.695

—149.795

—134.285

—132.342

—123.828

—120.810

—116.020

—115.704

—113.291

—77.414

—77.160

—76.907

—56.533

—55.977

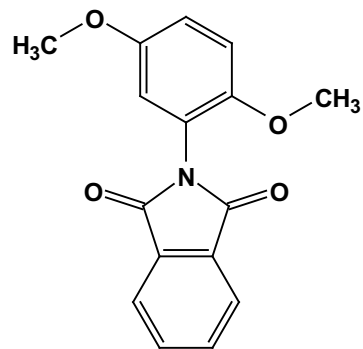

**7ae1**

**<sup>13</sup>C NMR (125 MHz, CDCl<sub>3</sub>)**

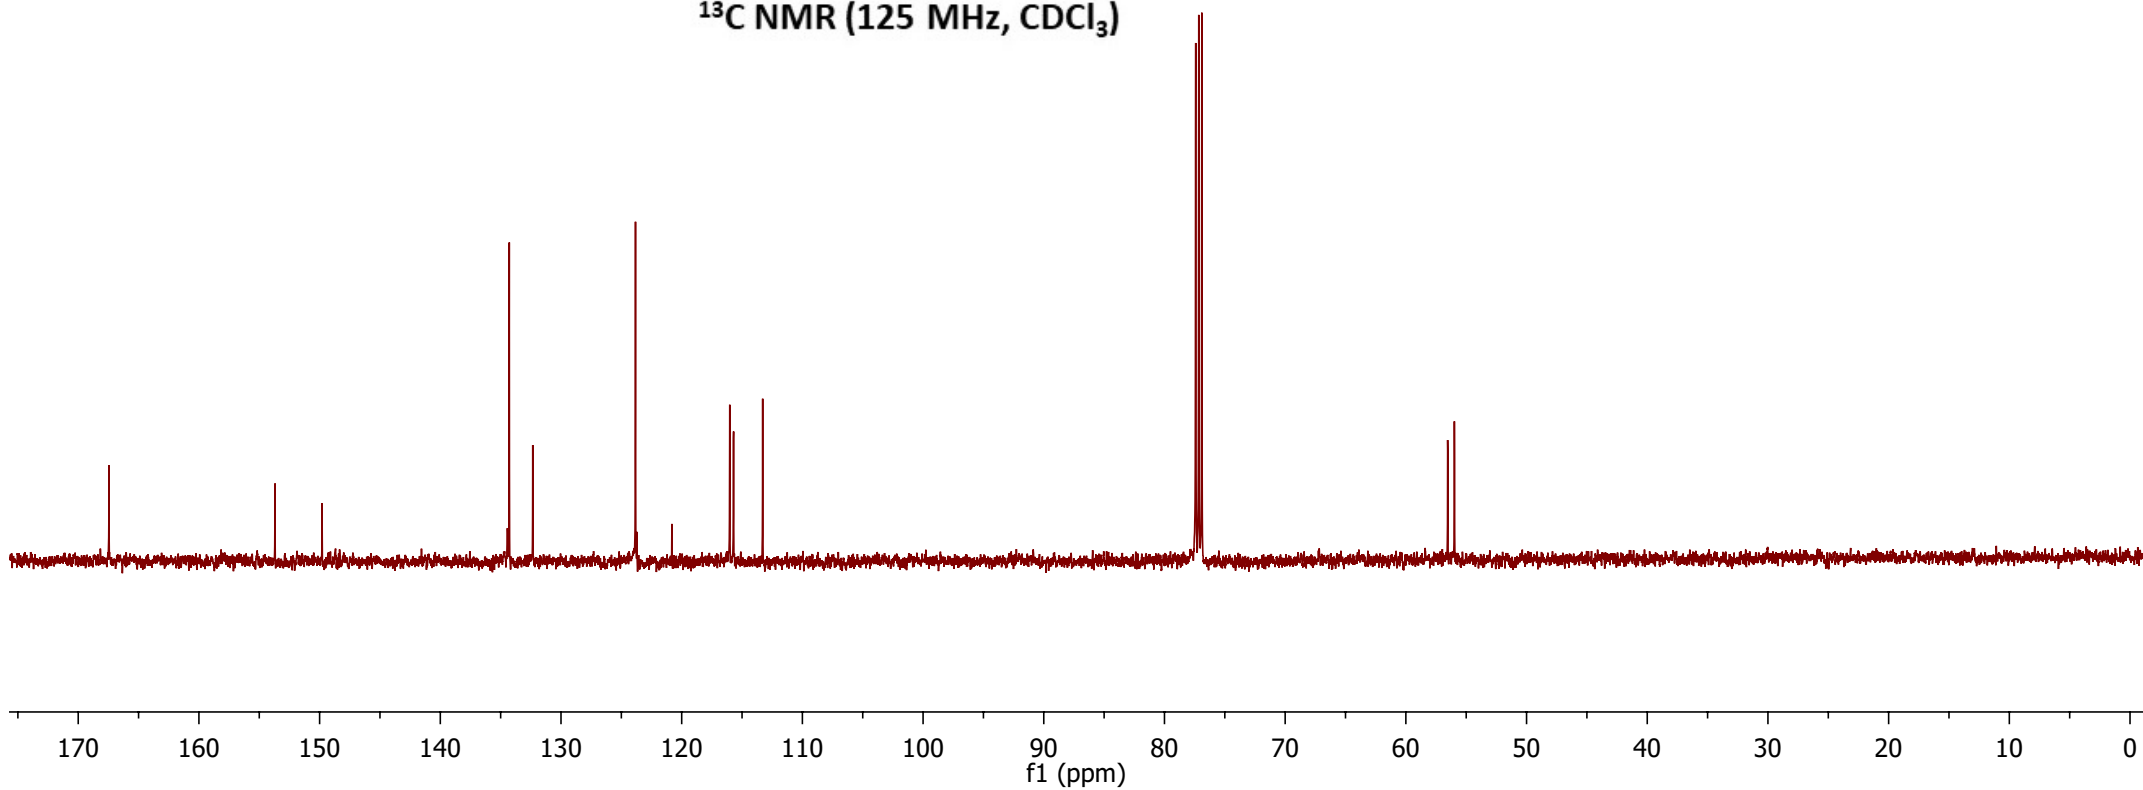

7.951  
7.945  
7.940  
7.935  
7.788  
7.783  
7.778  
7.772  
7.343  
7.327  
7.260  
7.031  
7.012

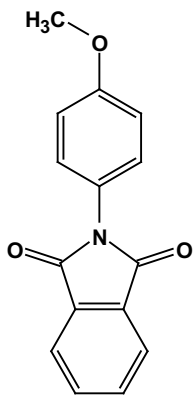

**7ae2**

**<sup>1</sup>H NMR (500 MHz, CDCl<sub>3</sub>)**

3.849

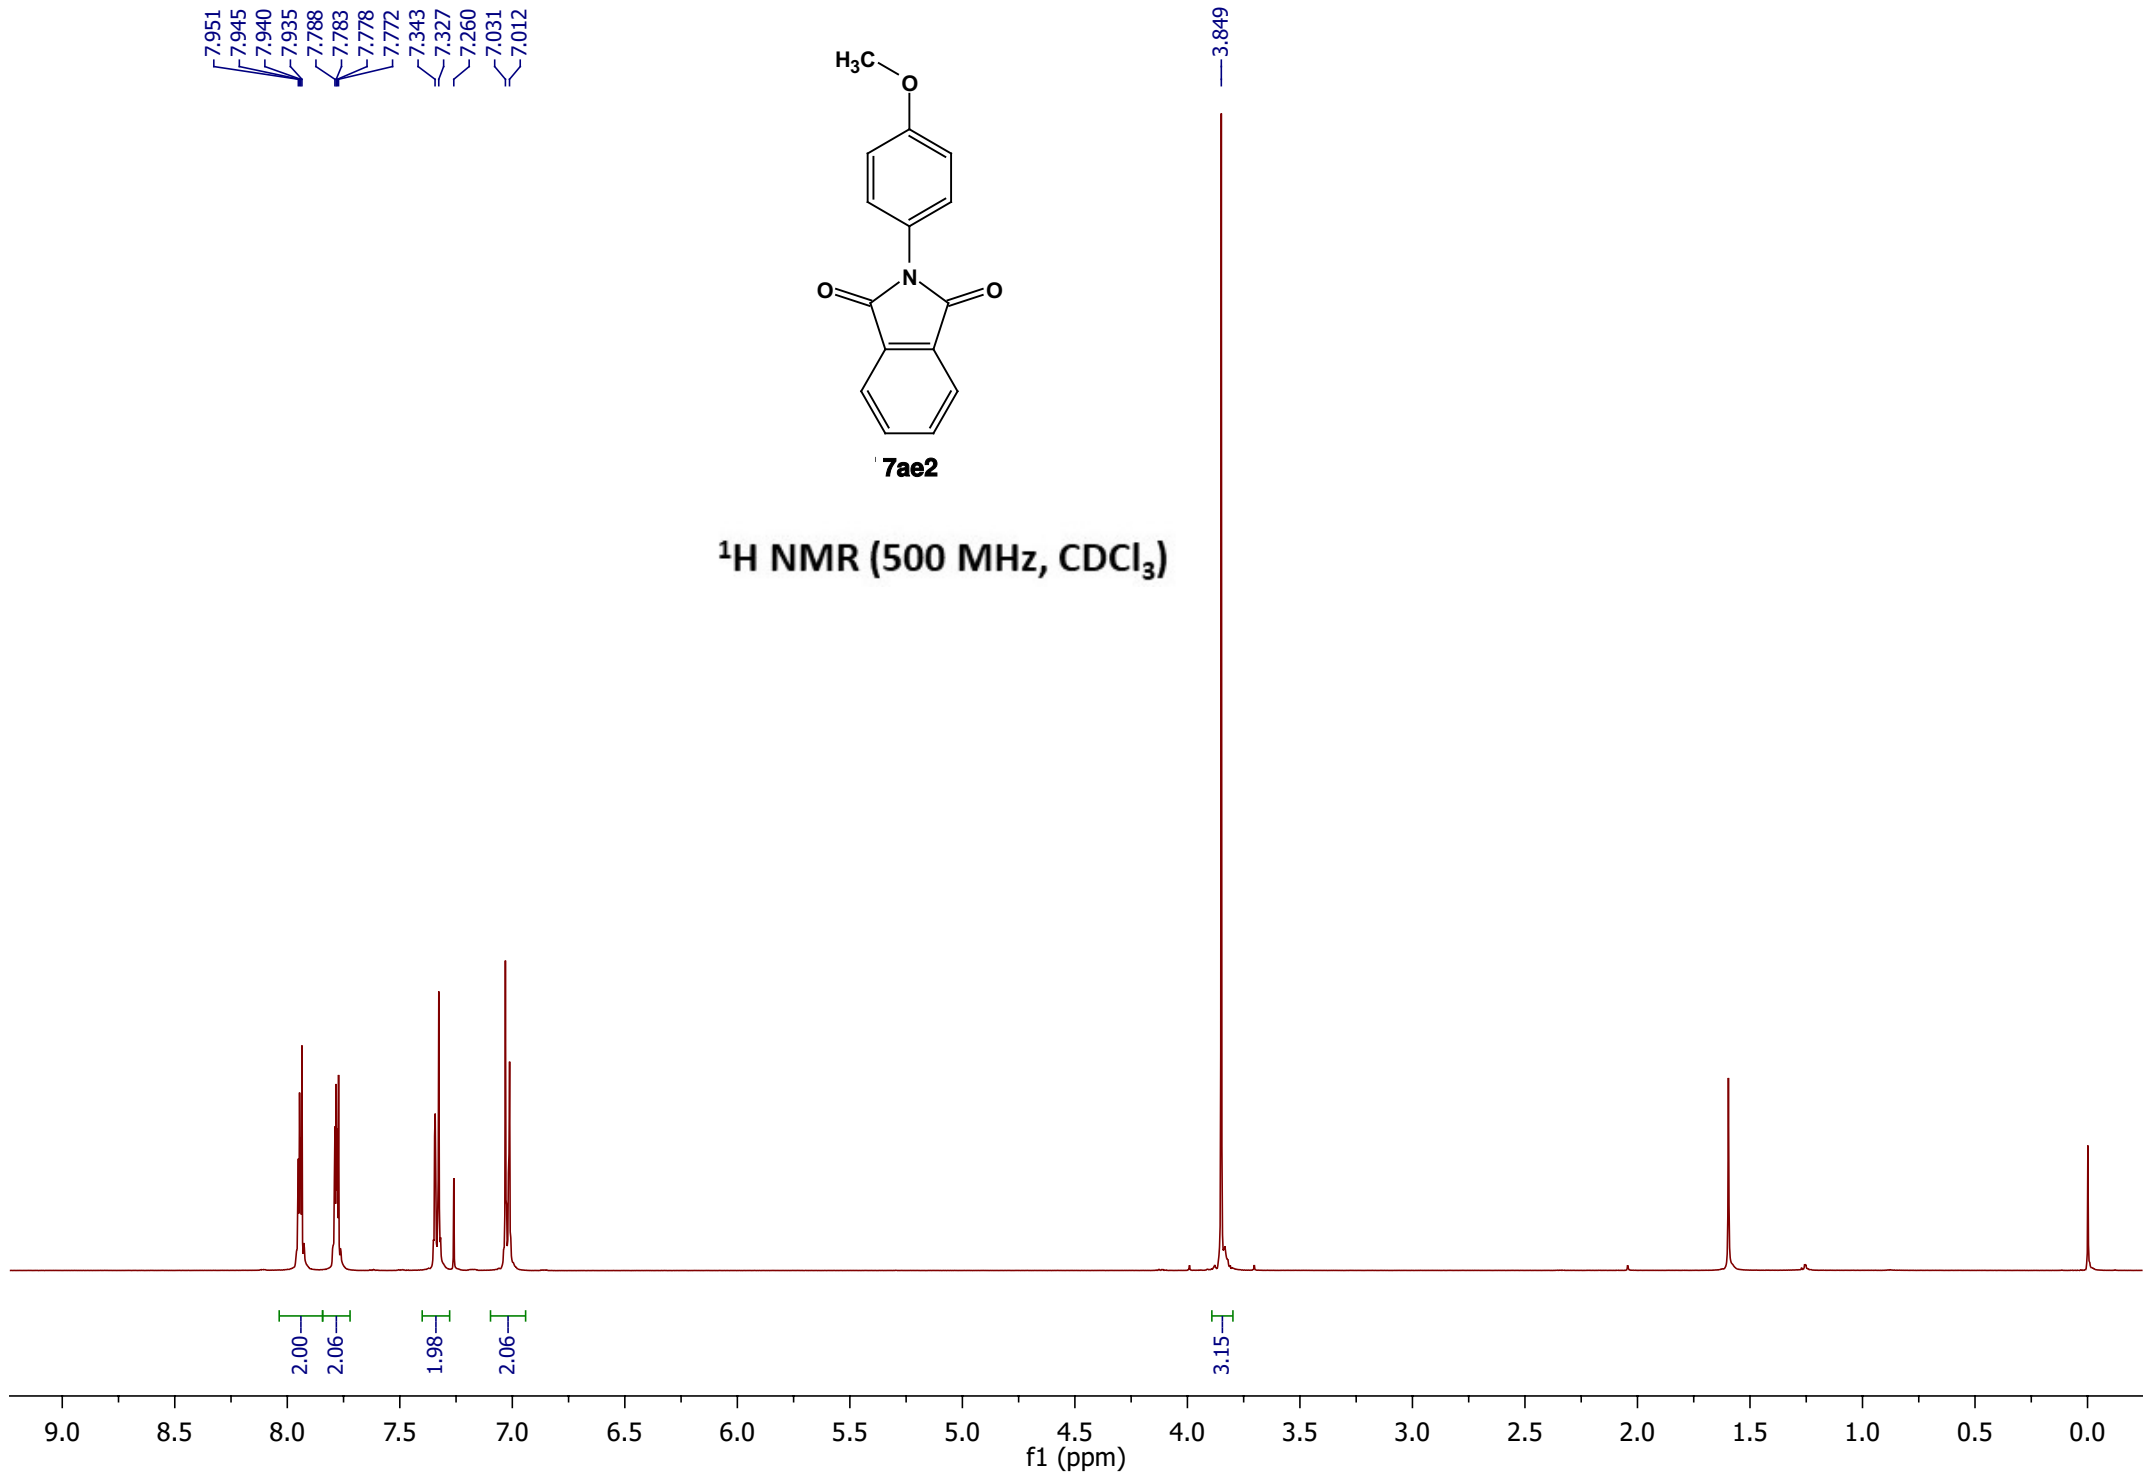

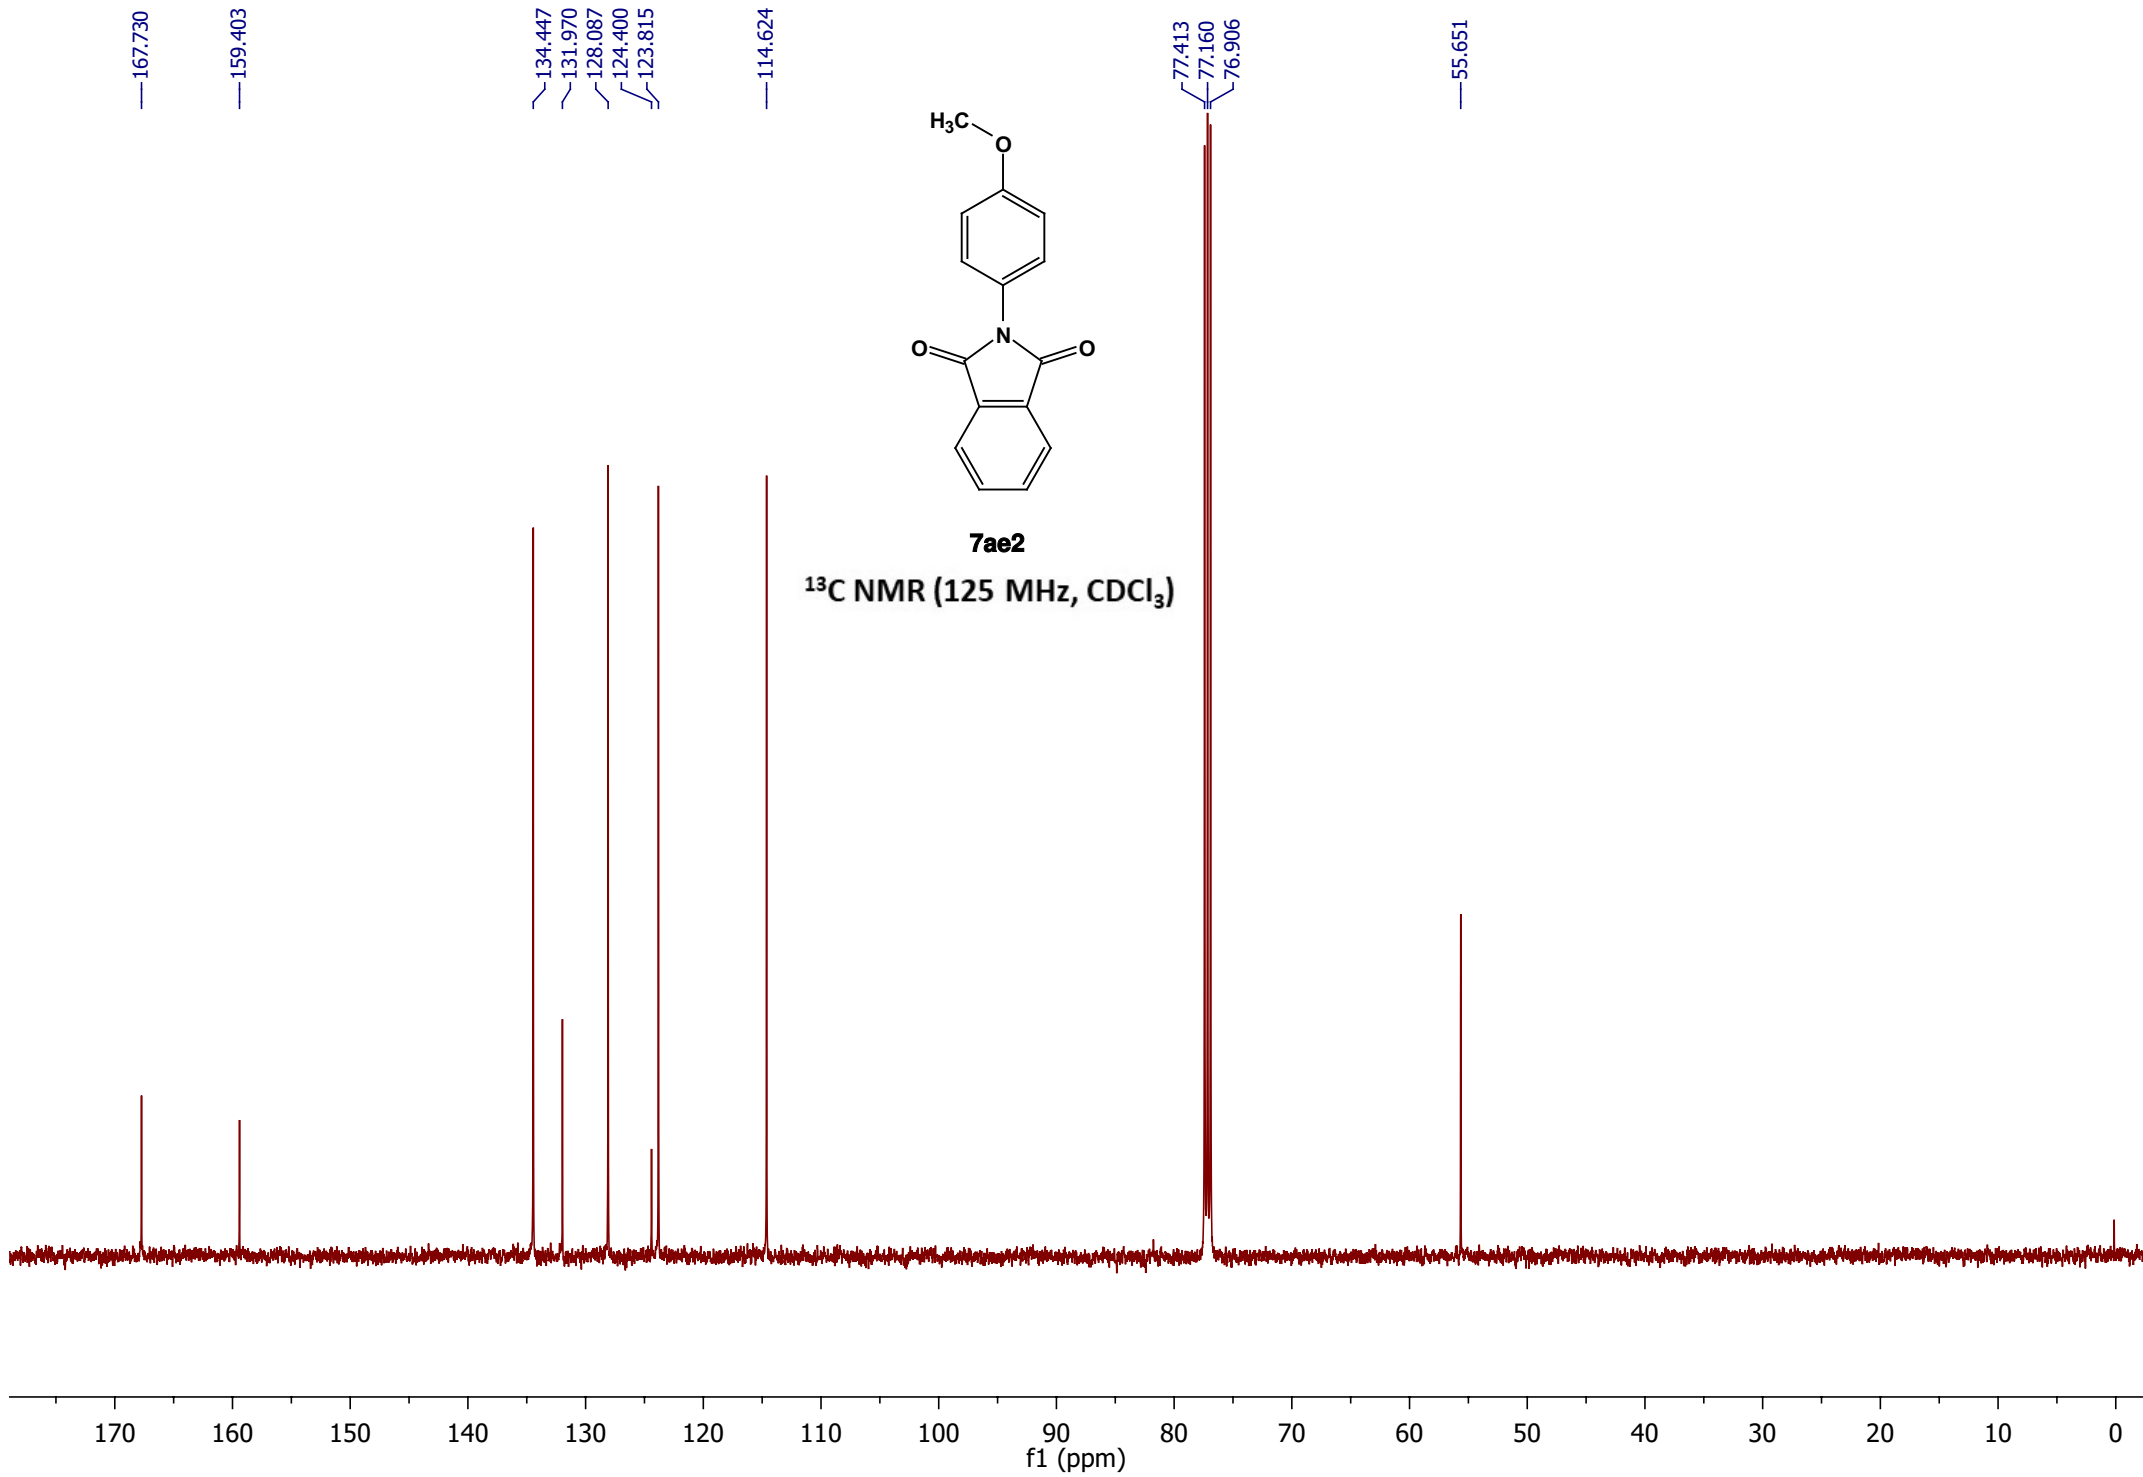

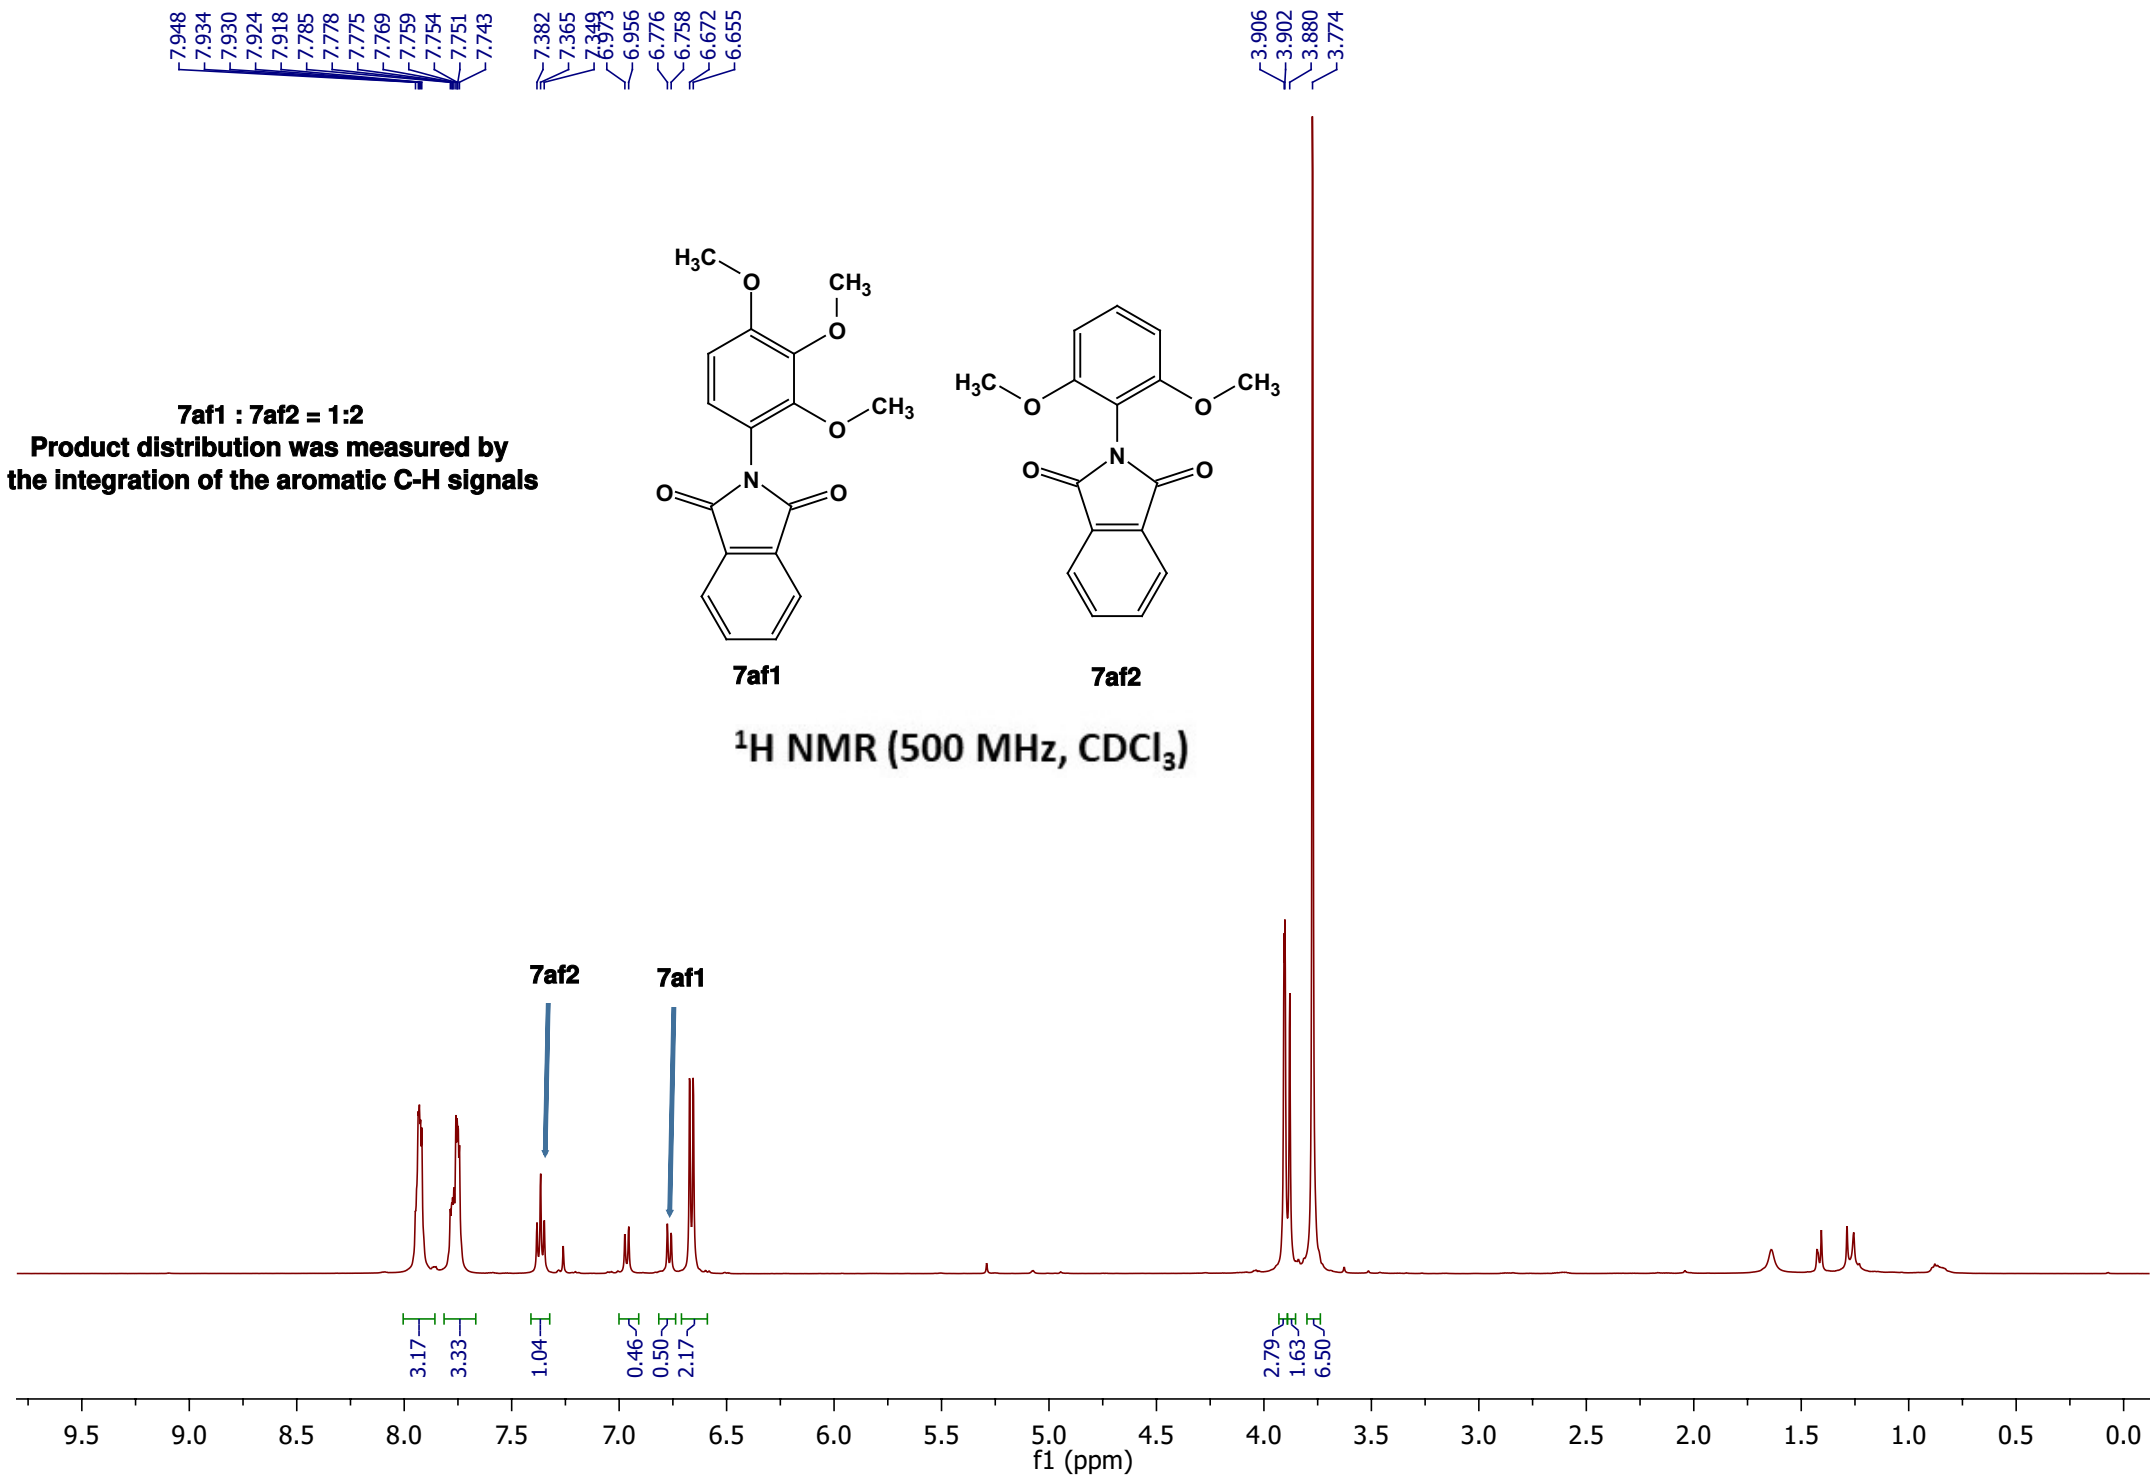

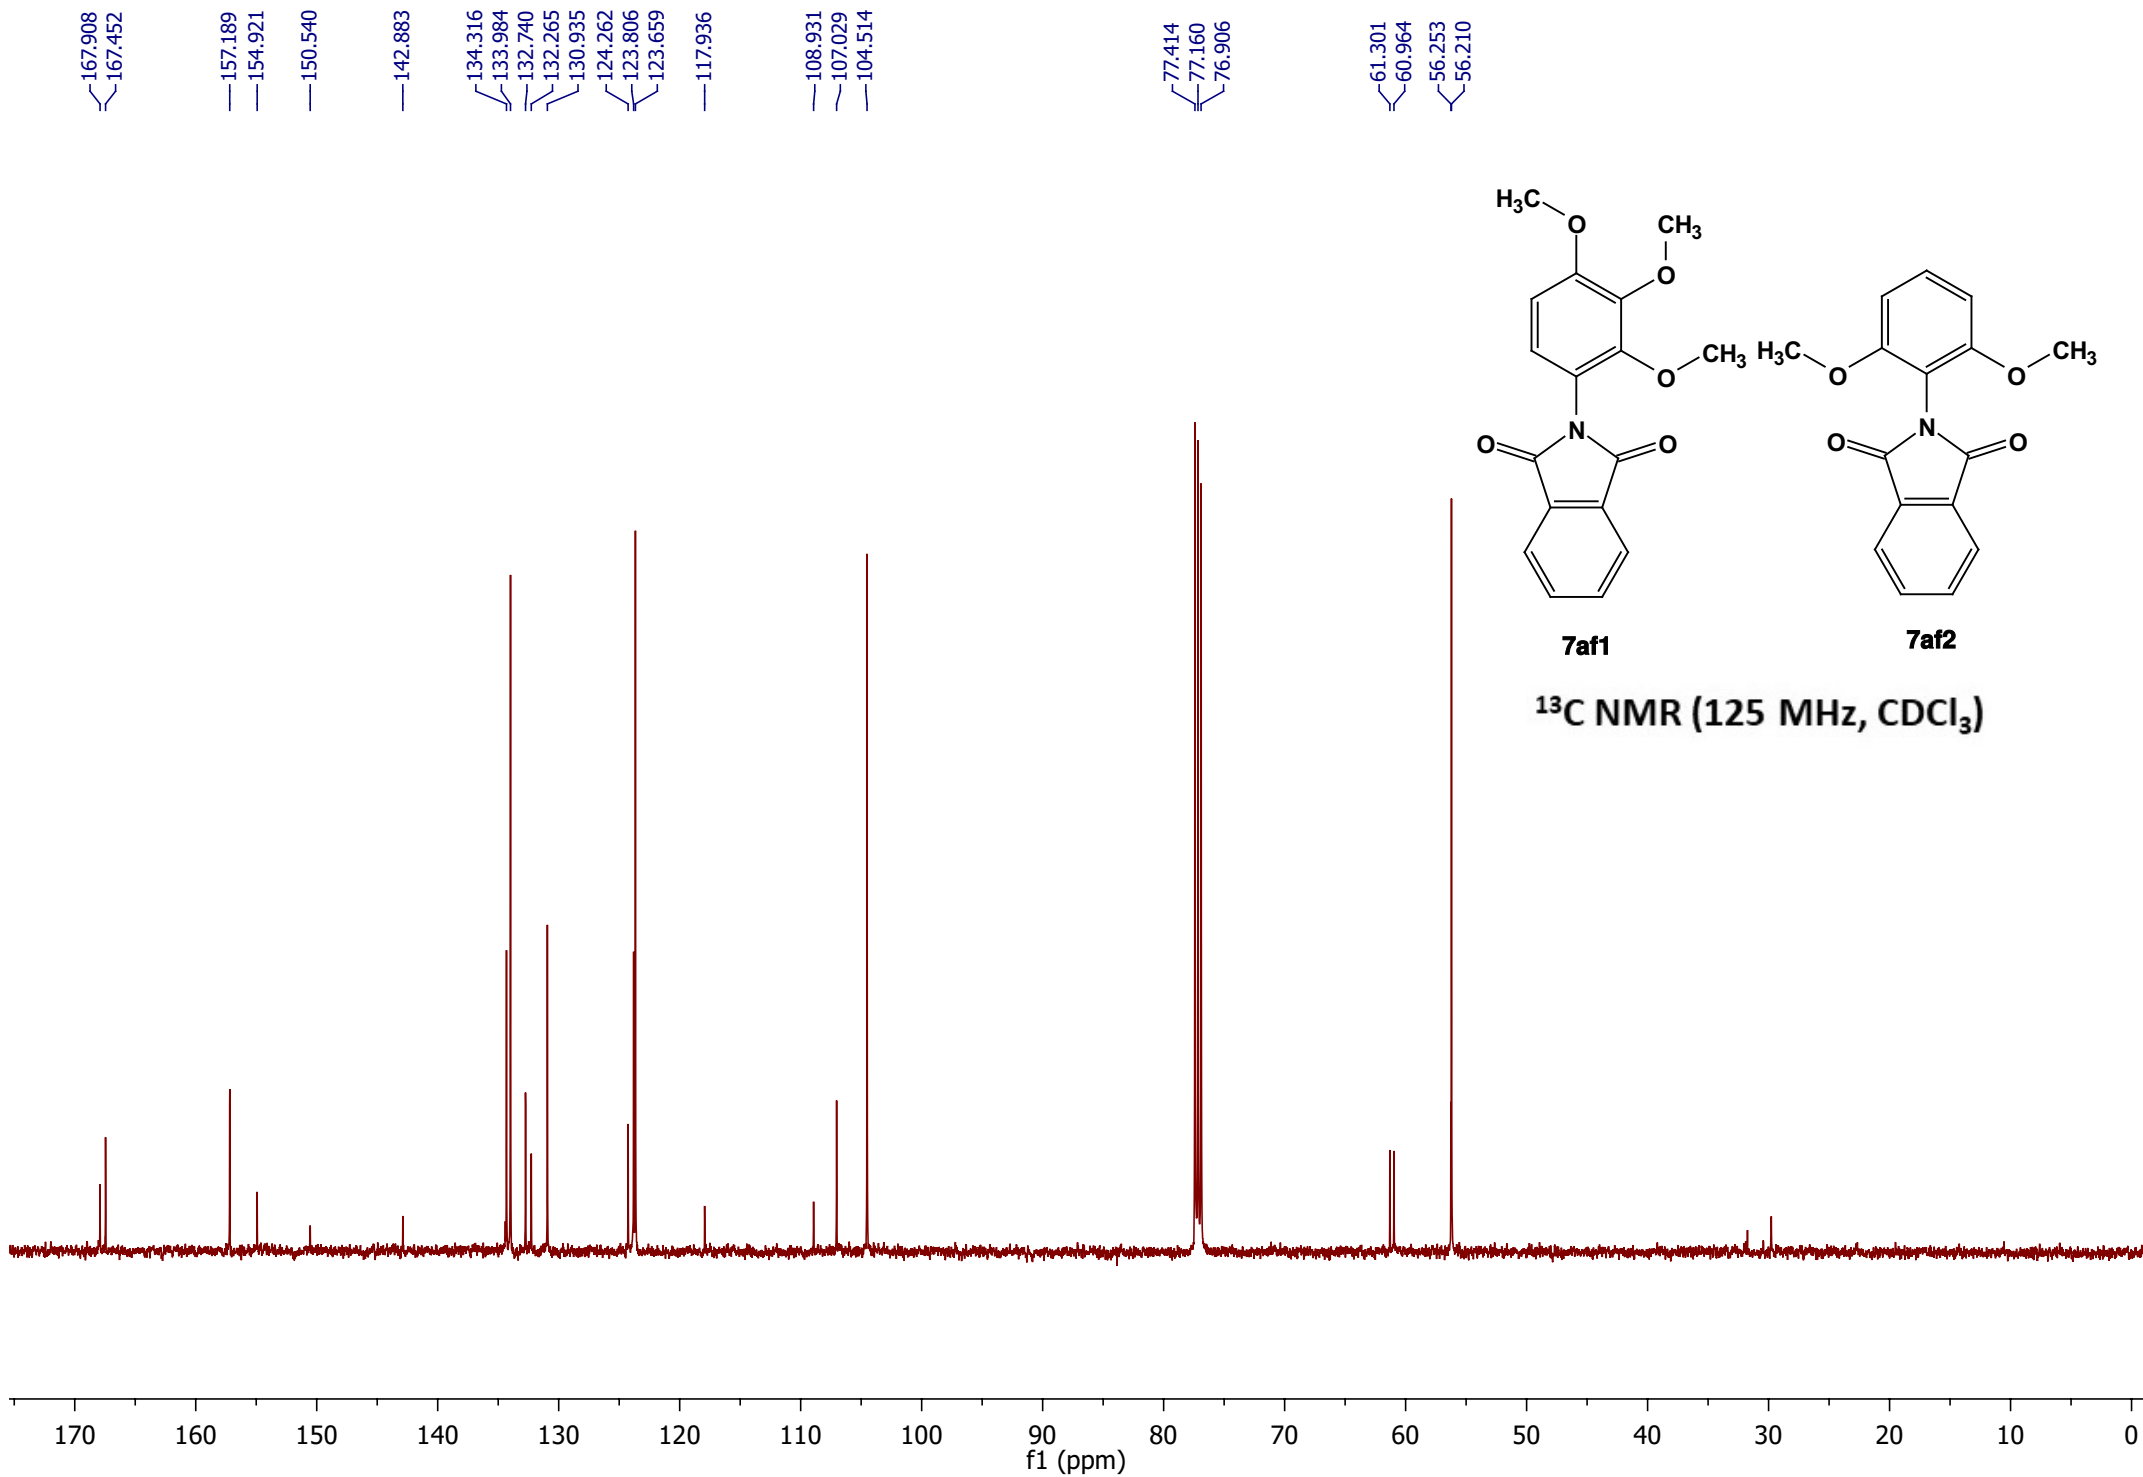

7.924  
7.918  
7.913  
7.908  
7.899  
7.893  
7.761  
7.751  
7.742  
7.735  
7.730  
7.725

6.370  
6.206

3.907  
3.865  
3.830  
3.826  
3.746  
3.740

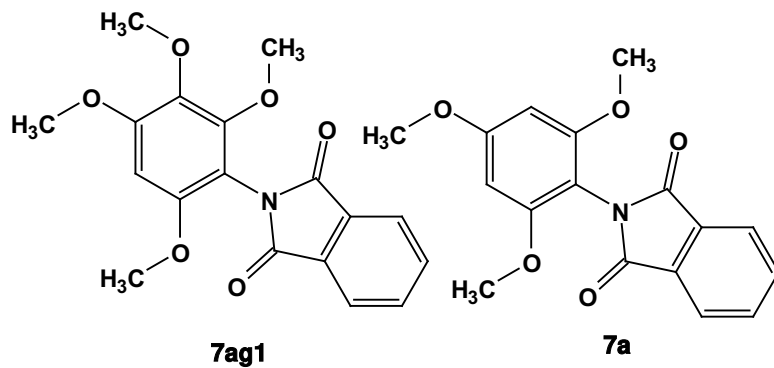

**7ag1 : 7a = 1:1**  
**Product distribution was measured by the integration of the -OMe signals**

**<sup>1</sup>H NMR (500 MHz, CDCl<sub>3</sub>)**

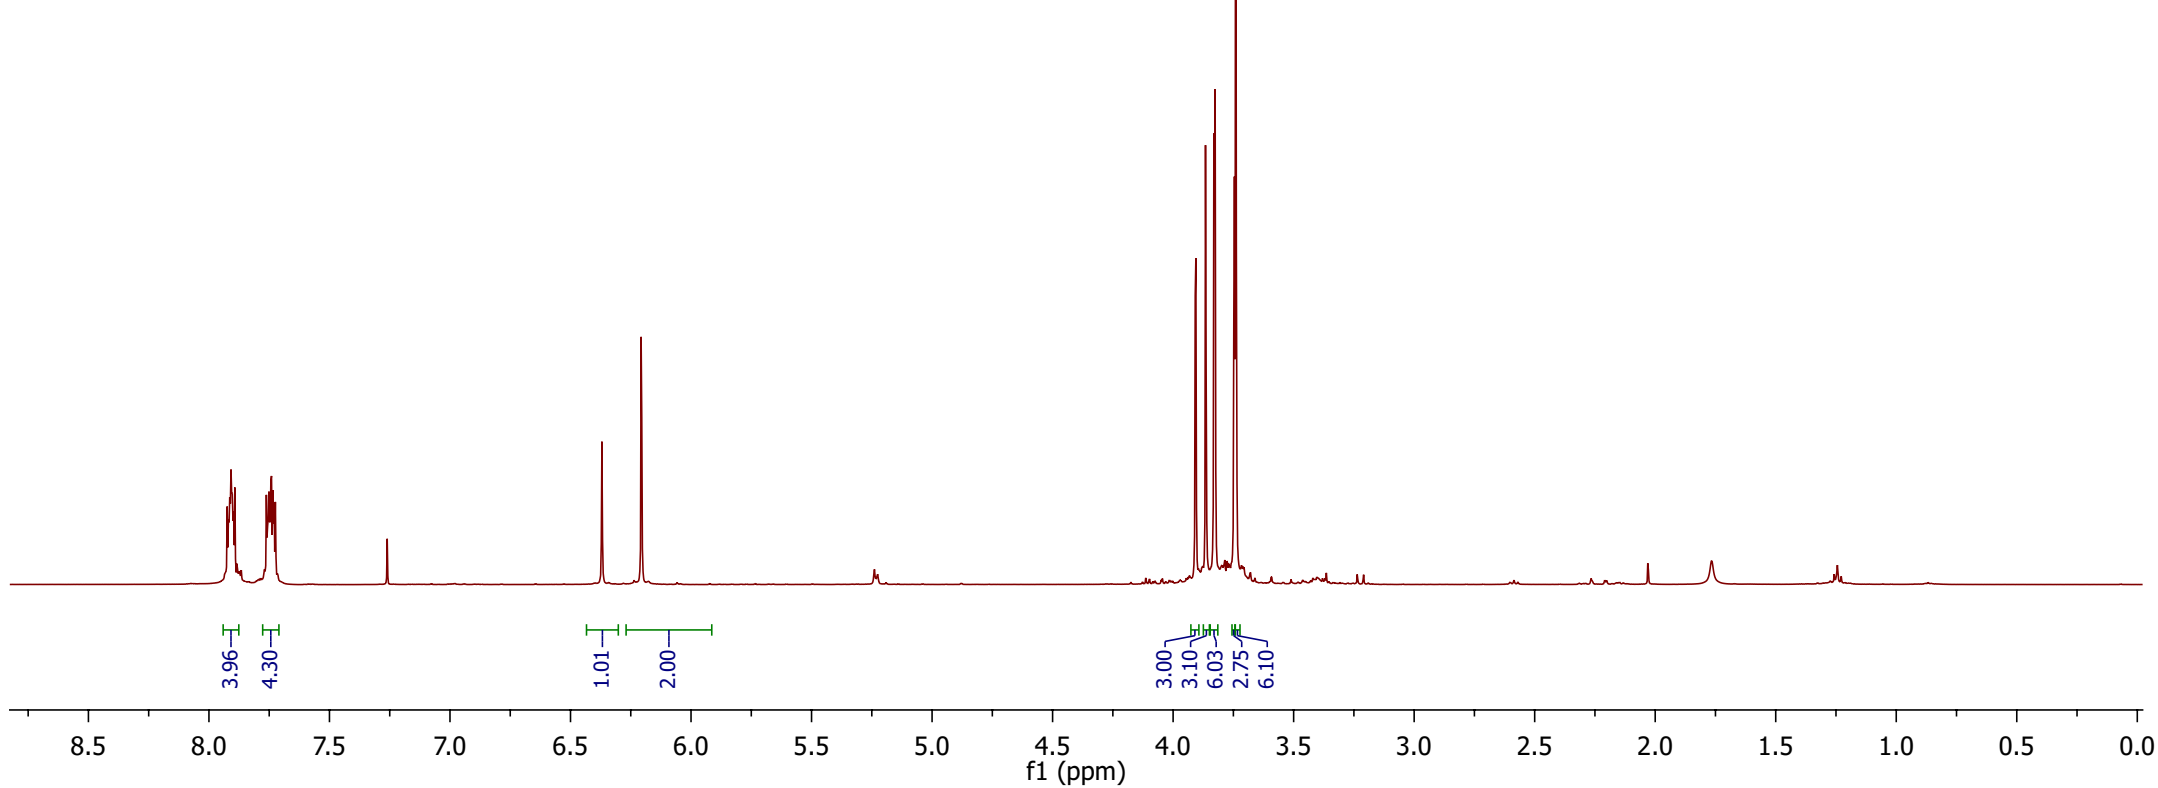

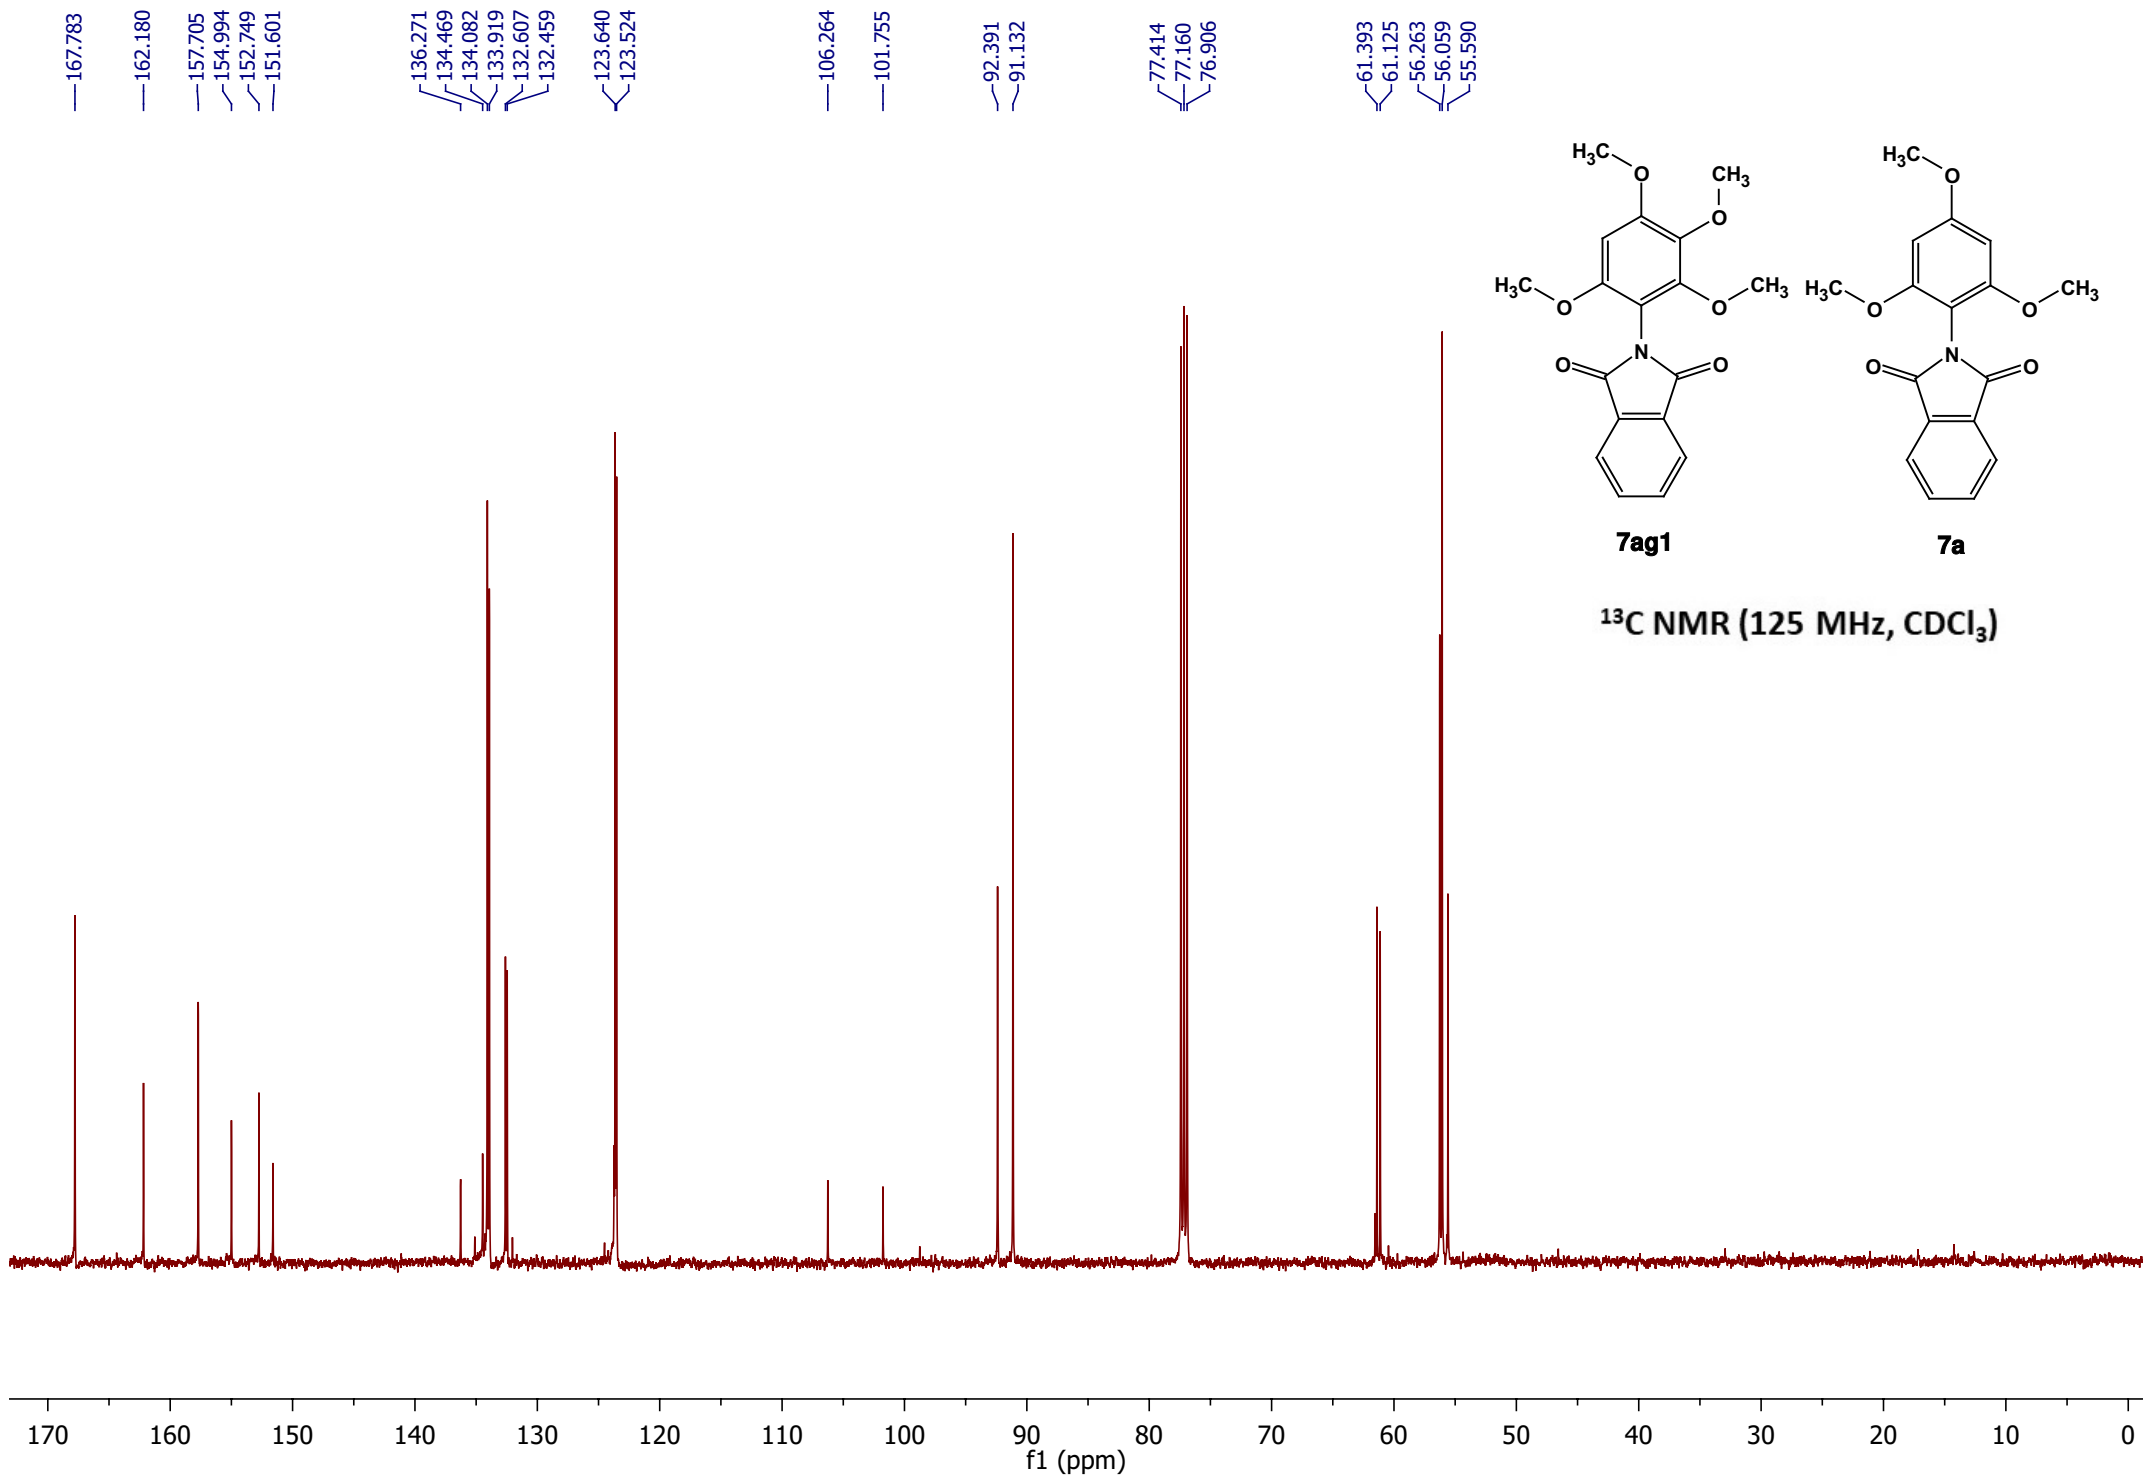



7.960  
7.952  
7.946  
7.941  
7.935  
7.927  
7.798  
7.790  
7.784  
7.779  
7.773  
7.767  
7.337  
7.319  
7.260  
7.043  
7.029  
7.025  
6.968  
6.965  
6.858  
6.085  
6.074  
6.066  
6.061  
6.051  
6.040  
6.032  
5.456  
5.453  
5.422  
5.419  
5.324  
5.307  
5.307  
4.583  
4.578  
4.575  
4.509  
4.498

-0.001

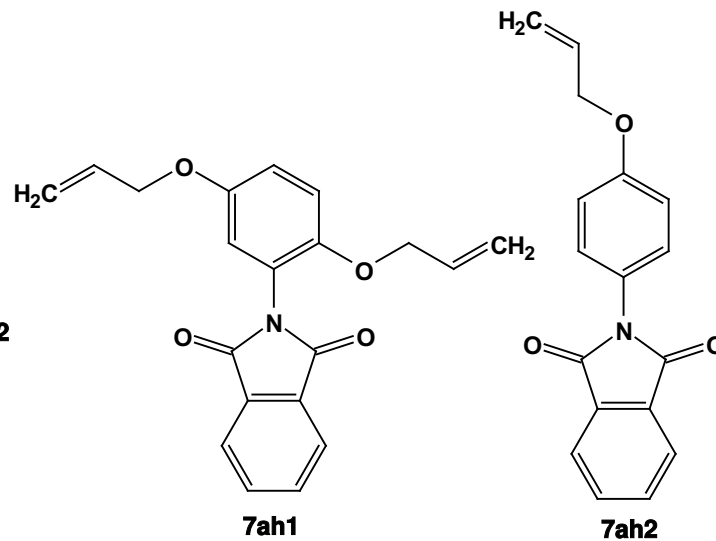

**7ah1 : 7ah2 = 1 : 1.74**  
**Product distribution was measured by the integration of the Aromatic C-H signals of phenyl ring**

**<sup>1</sup>H NMR (500 MHz, CDCl<sub>3</sub>)**

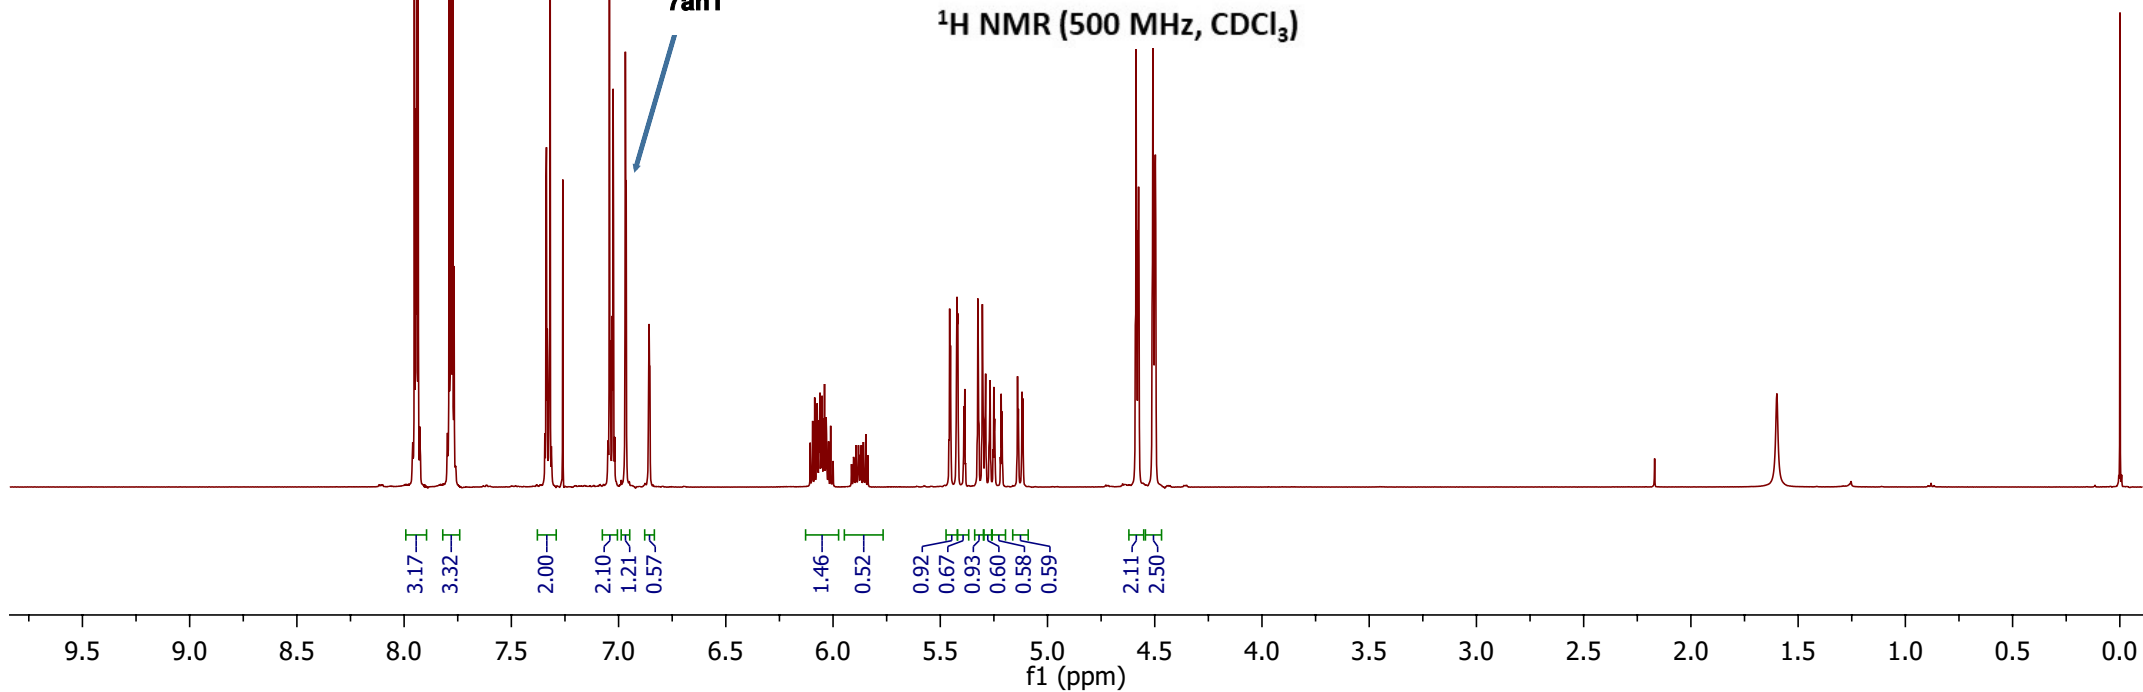

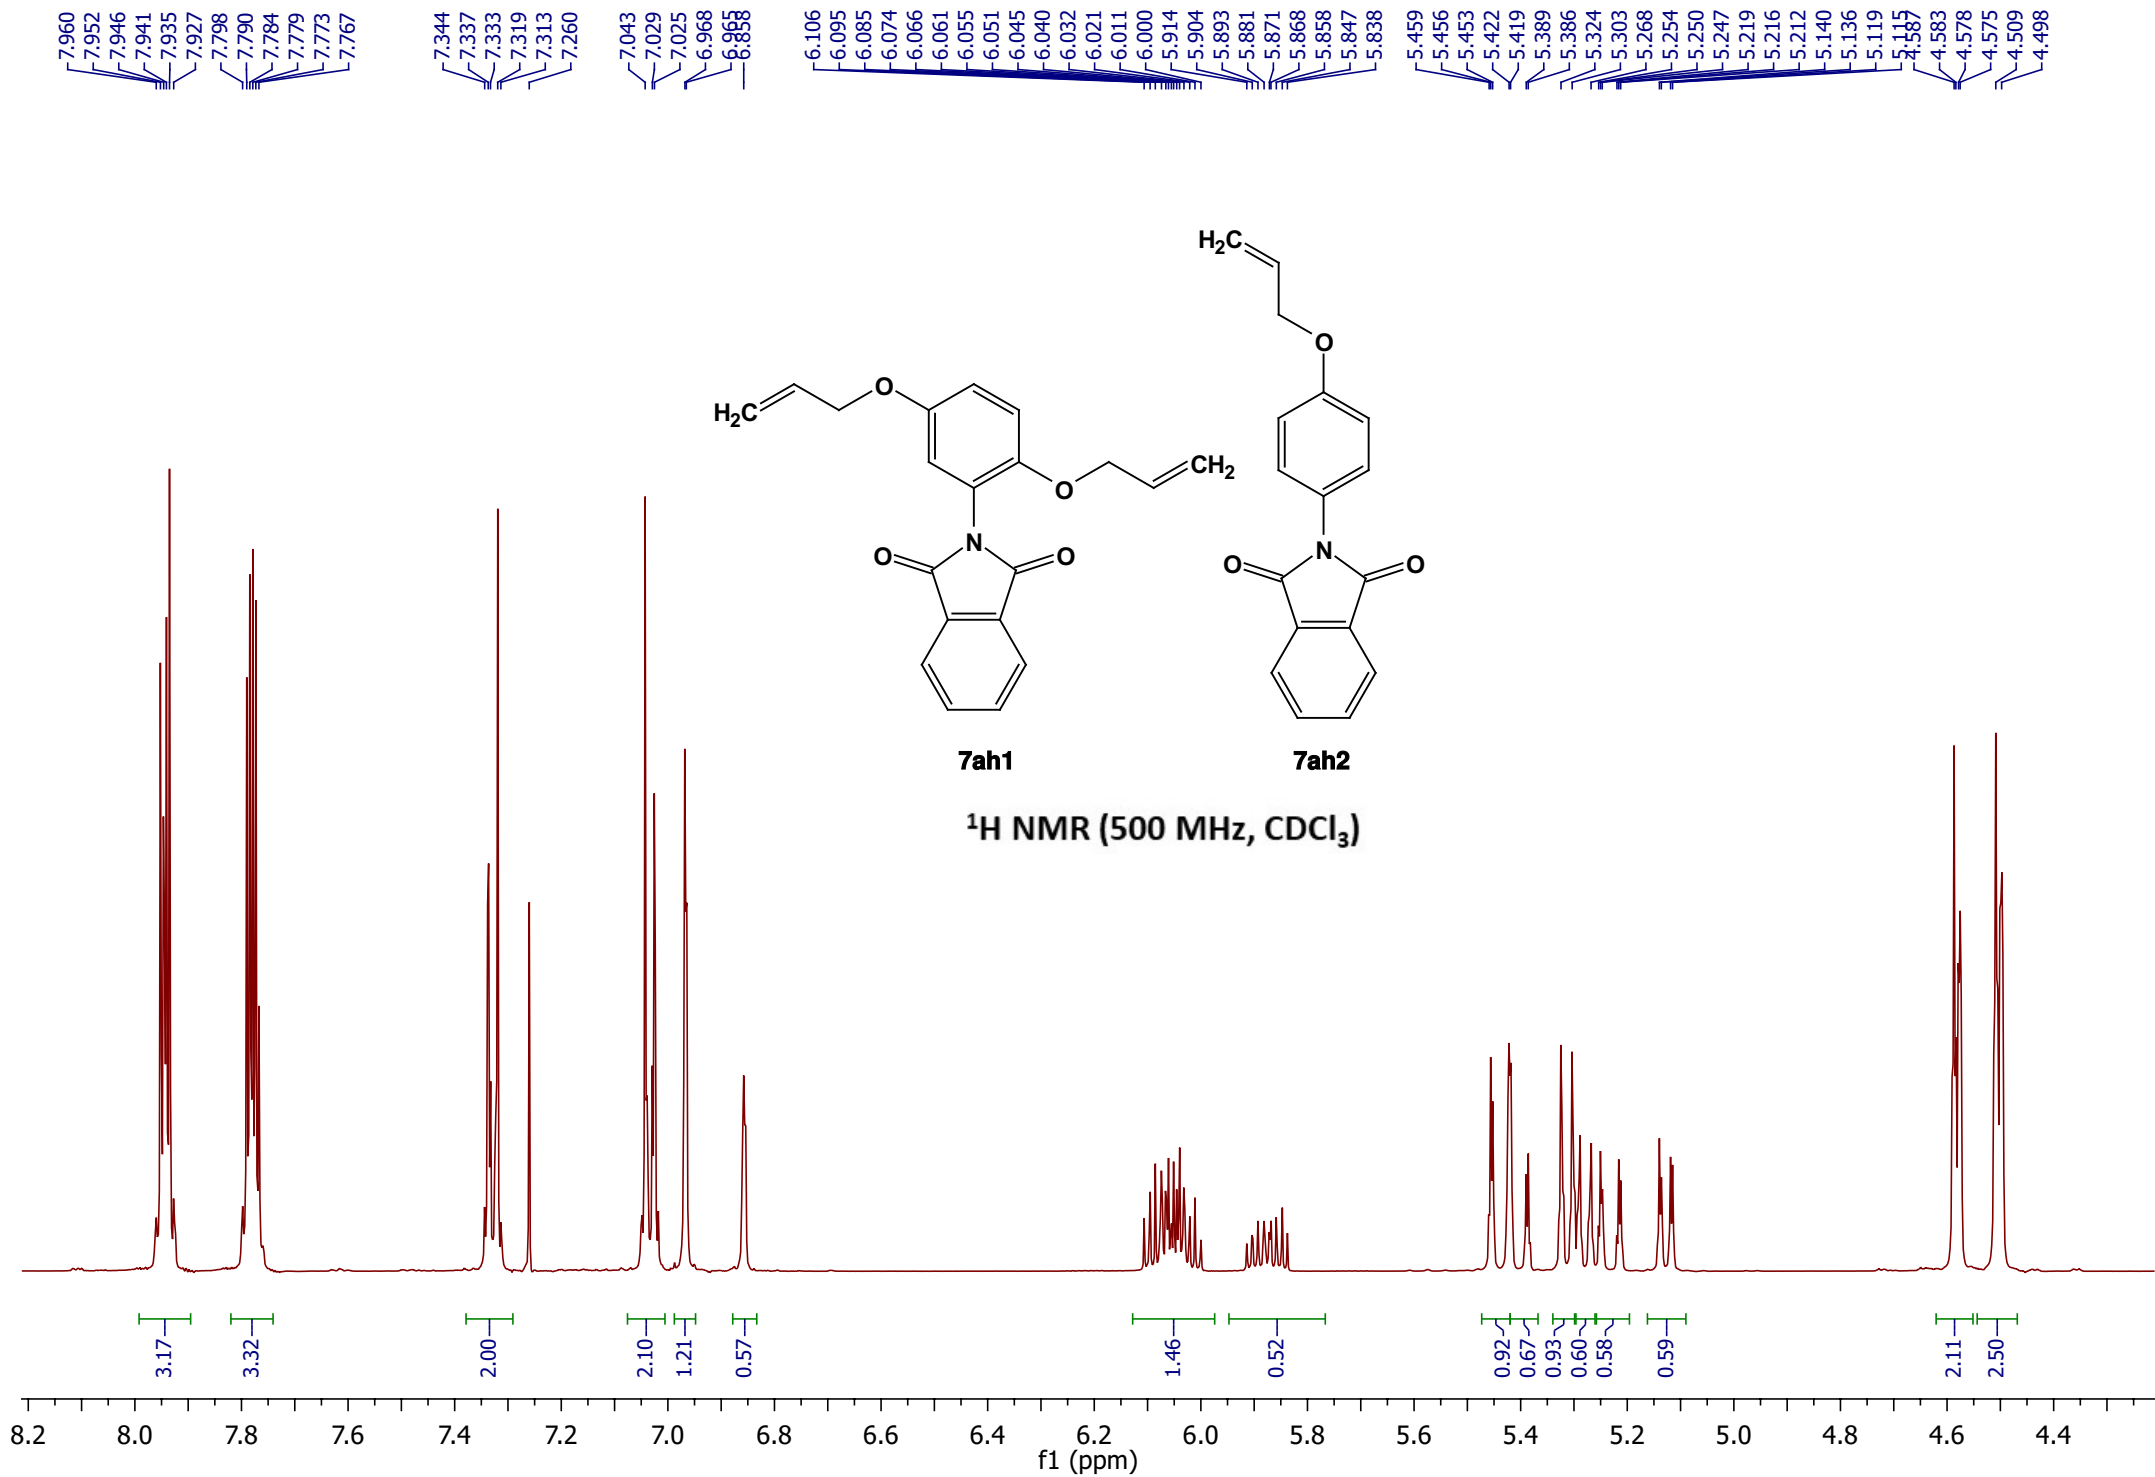

167.705  
167.404

158.407

152.886

148.845

134.450

134.287

133.293

133.170

133.080

132.332

131.946

128.034

124.507

123.810

121.356

118.055

117.898

117.274

116.806

116.581

115.399

114.890

77.414

77.160

76.906

70.073

69.688

69.181

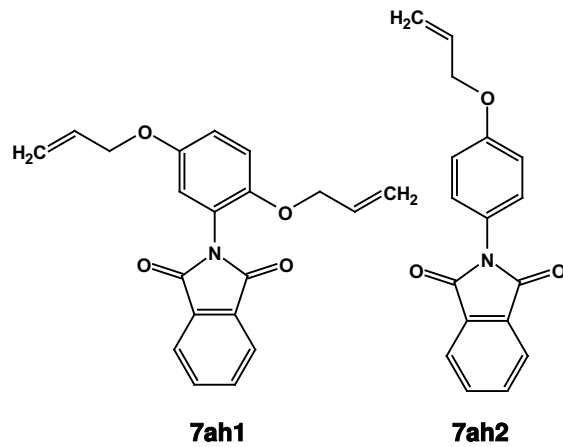

<sup>13</sup>C NMR (125 MHz, CDCl<sub>3</sub>)

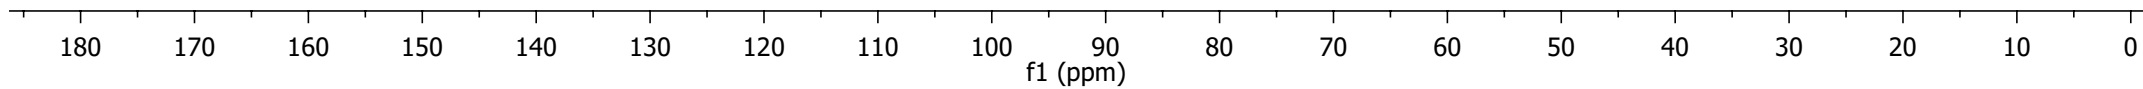

7.942  
7.936  
7.932  
7.926  
7.918  
7.793  
7.785  
7.779  
7.774  
7.769  
7.363  
7.345  
7.260  
7.035  
7.017

4.648  
4.305  
4.291  
4.276  
4.262

1.323  
1.307  
1.294

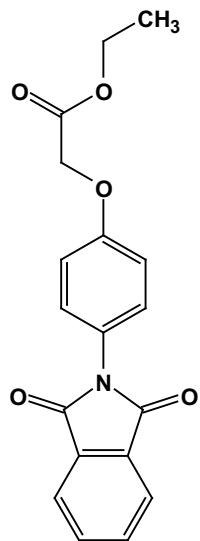

**7ai**

<sup>1</sup>H NMR (500 MHz, CDCl<sub>3</sub>)

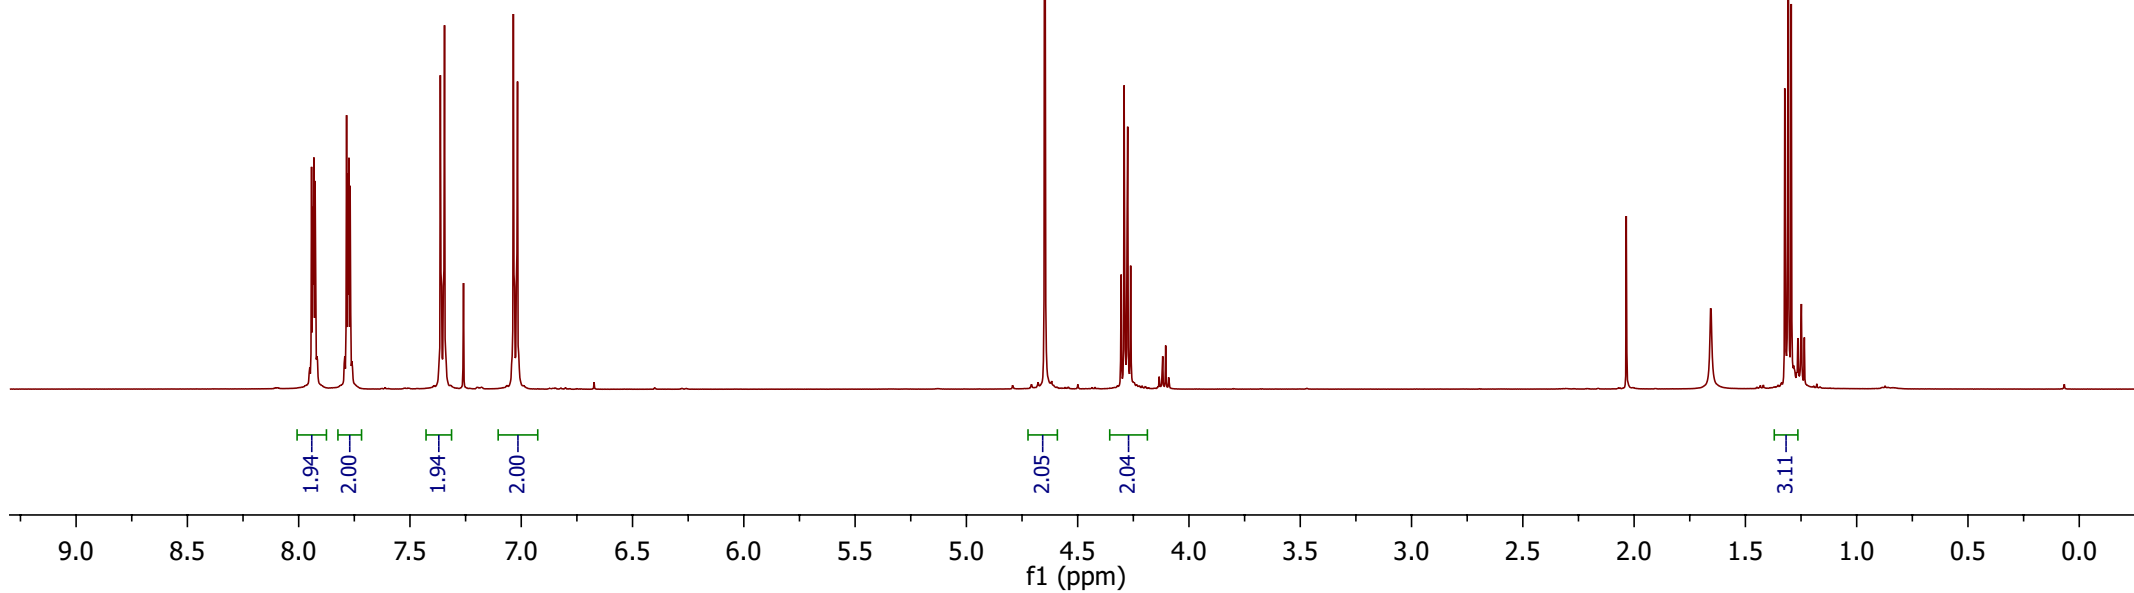

168.730  
167.545

157.550

134.484  
131.890  
128.071  
125.482  
123.817

115.396

77.414  
77.160  
76.907

65.798

61.612

14.286

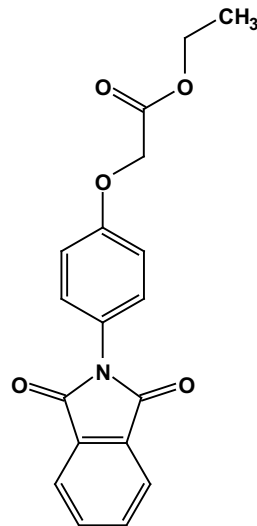

**7ai**

<sup>13</sup>C NMR (125 MHz, CDCl<sub>3</sub>)

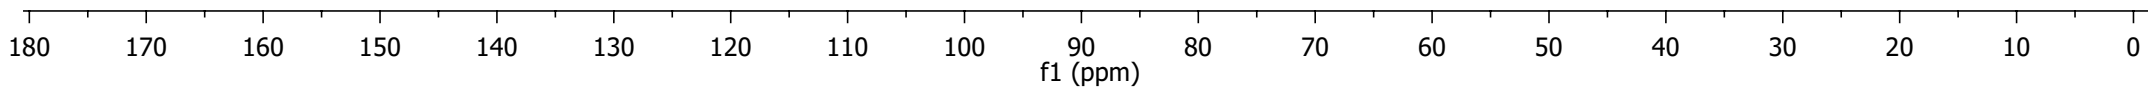

7.832  
7.827  
7.822  
7.816  
7.699  
7.693  
7.688  
7.683

7.269  
7.254  
7.085  
7.069  
6.815  
6.800  
6.786

5.278

3.168

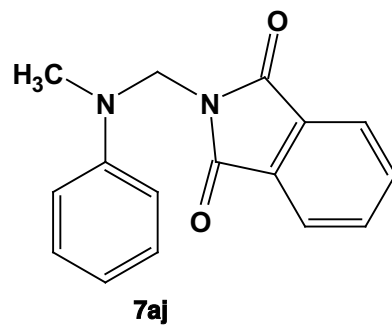

<sup>1</sup>H NMR (500 MHz, CDCl<sub>3</sub>)

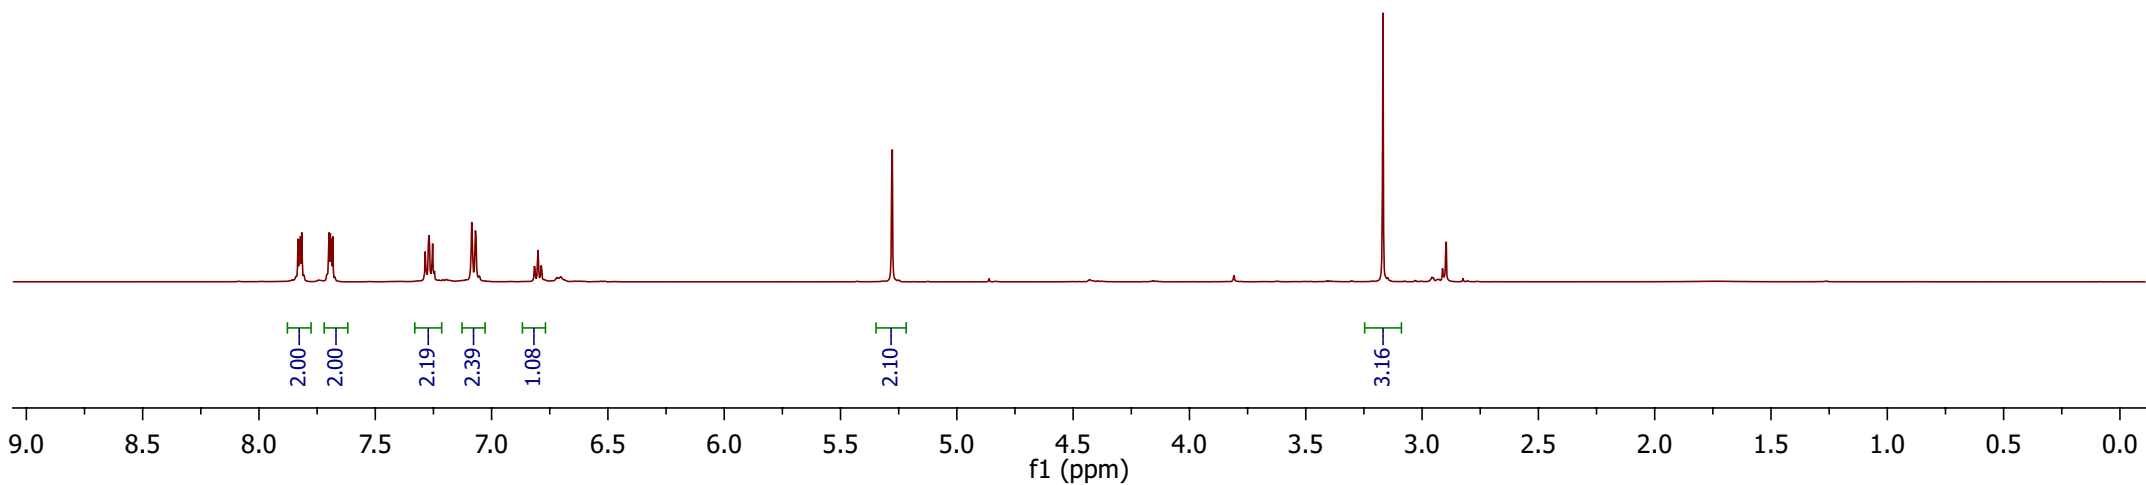

—168.831

—147.415

—134.233

—132.116

—129.231

—123.521

—118.450

—113.689

—77.415

—77.160

—76.906

—56.591

—39.114

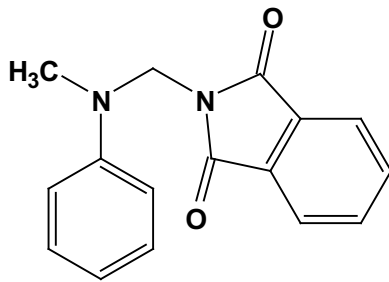

**7aj**

**<sup>13</sup>C NMR (125 MHz, CDCl<sub>3</sub>)**

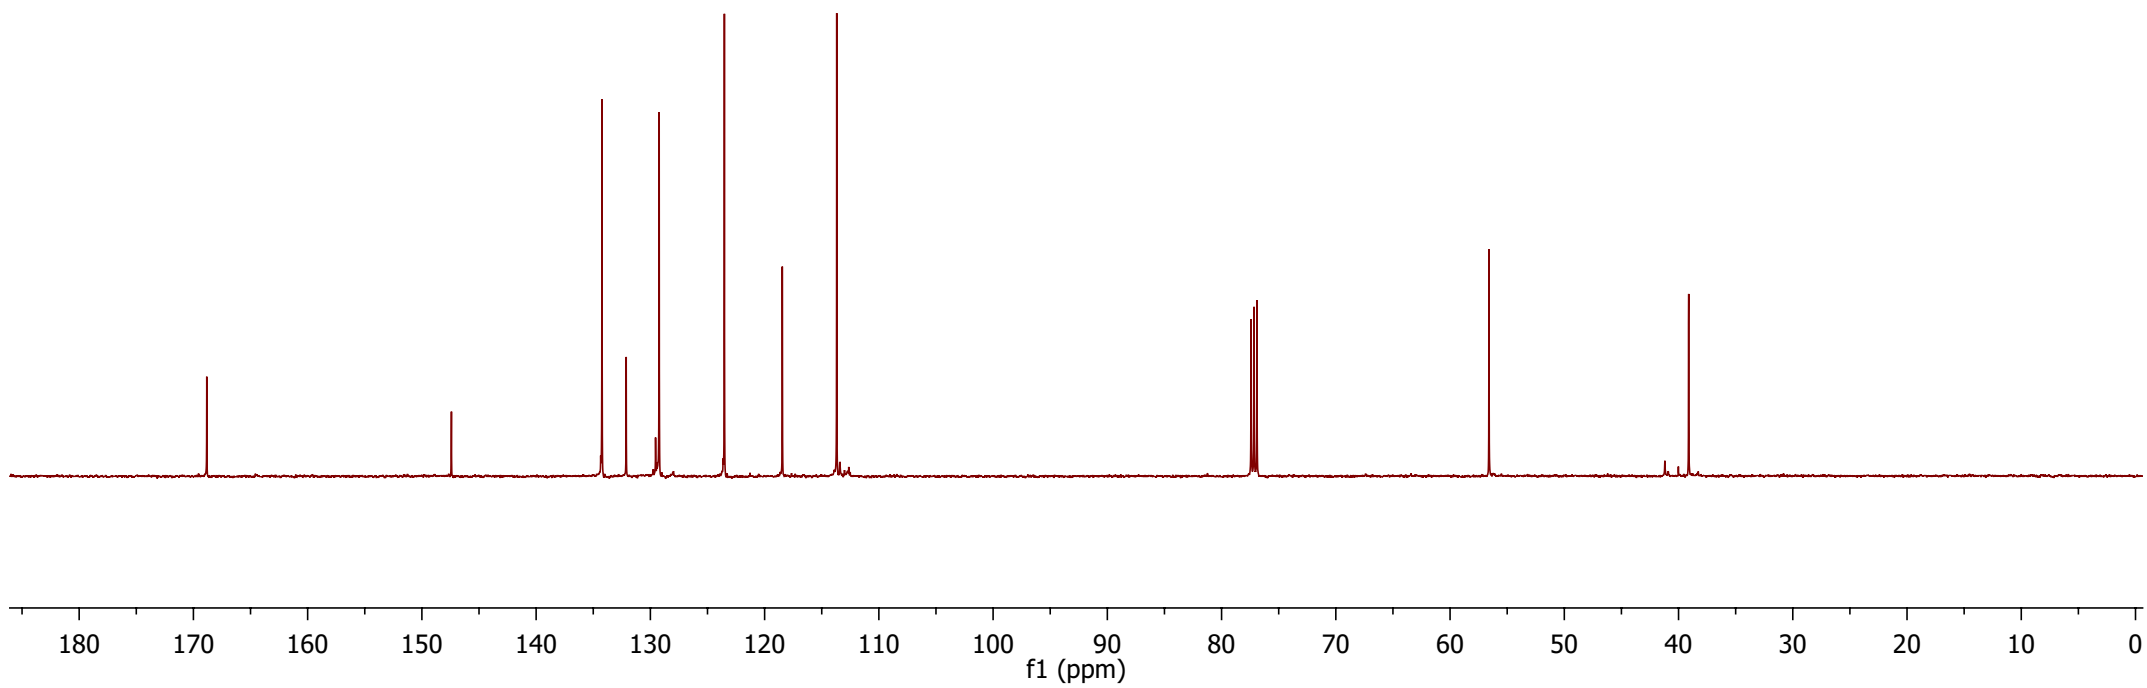

10.375

7.428  
7.414  
7.410  
7.260  
6.876  
6.868  
6.852

3.954  
3.939  
3.924  
3.829  
3.788

2.695  
2.679  
2.663  
2.106  
2.090  
2.075  
2.060  
2.044

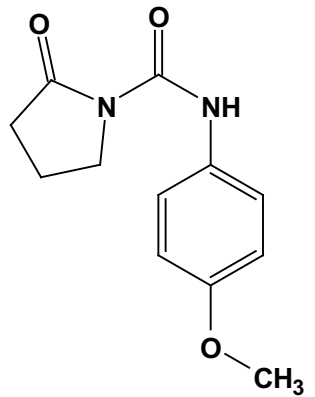

7ak

<sup>1</sup>H NMR (500 MHz, CDCl<sub>3</sub>)

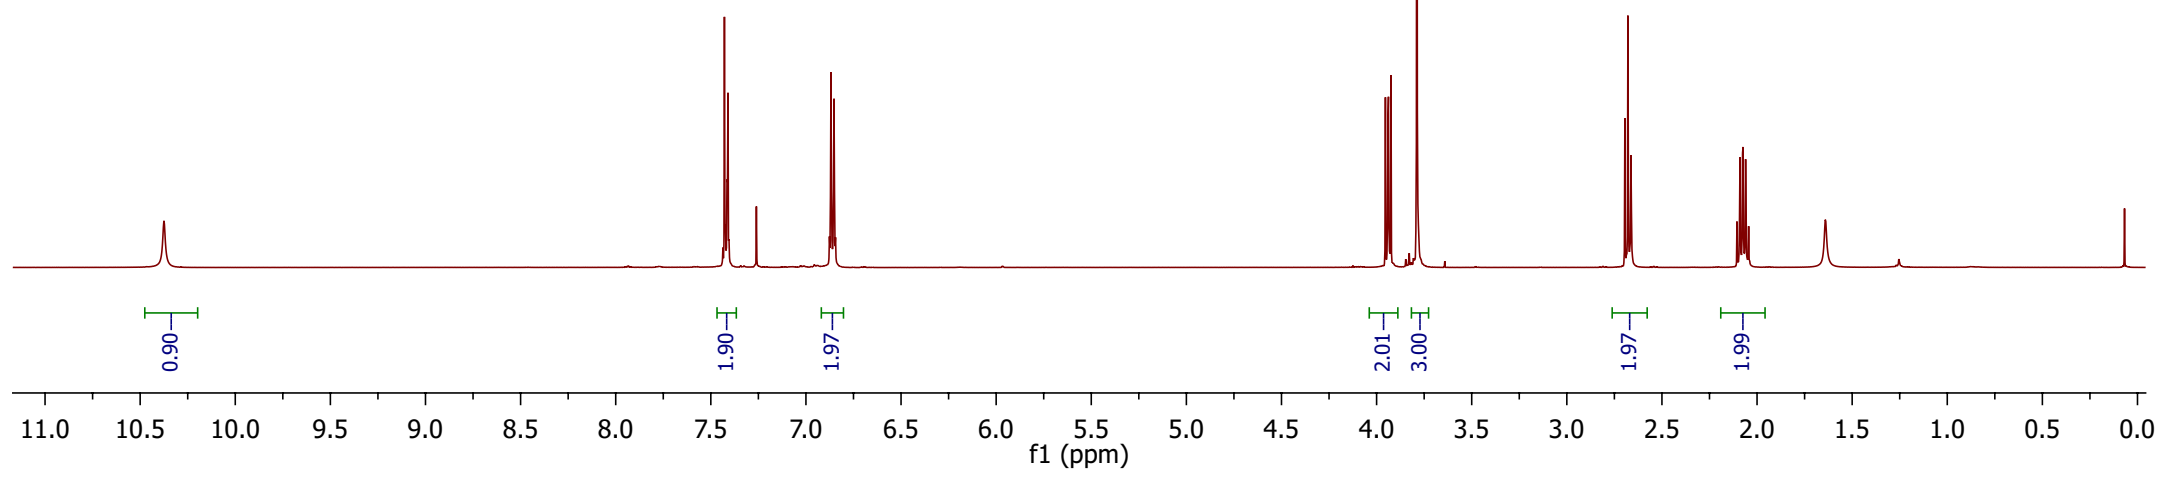



—177.363

—156.436

—150.514

—130.612

—121.937

—114.319

77.414  
77.160  
76.907

—55.607

—45.840

—33.656

—16.949

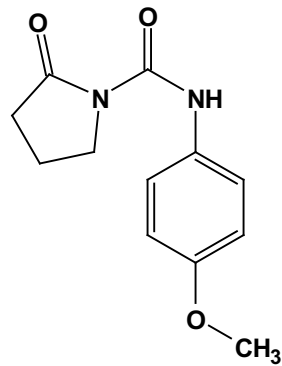

**7ak**

<sup>13</sup>C NMR (125 MHz, CDCl<sub>3</sub>)

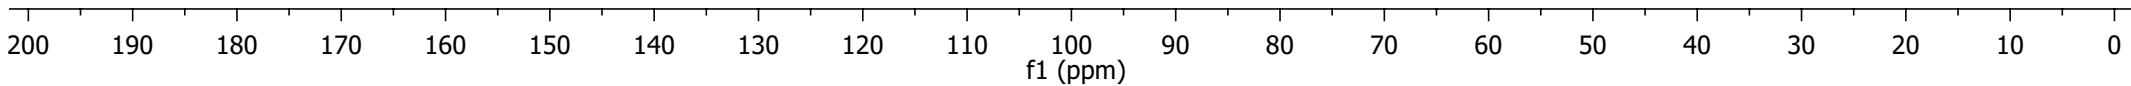

7.953  
7.948  
7.944  
7.939  
7.879  
7.874  
7.870  
7.865  
7.789  
7.783  
7.774  
7.768  
7.763  
7.759  
7.754  
7.446  
7.433  
7.420  
7.342  
7.327  
7.260  
7.253  
7.087  
7.074  
7.058  
7.044  
7.027  
7.012

3.847  
3.797

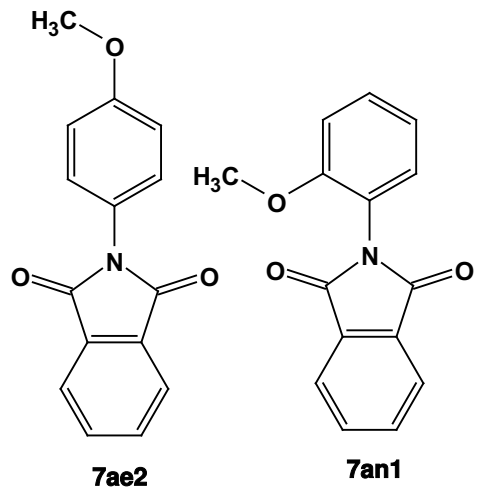

<sup>1</sup>H NMR (600 MHz, CDCl<sub>3</sub>)

**7an1 : 7ae2 = 1.2 : 1**

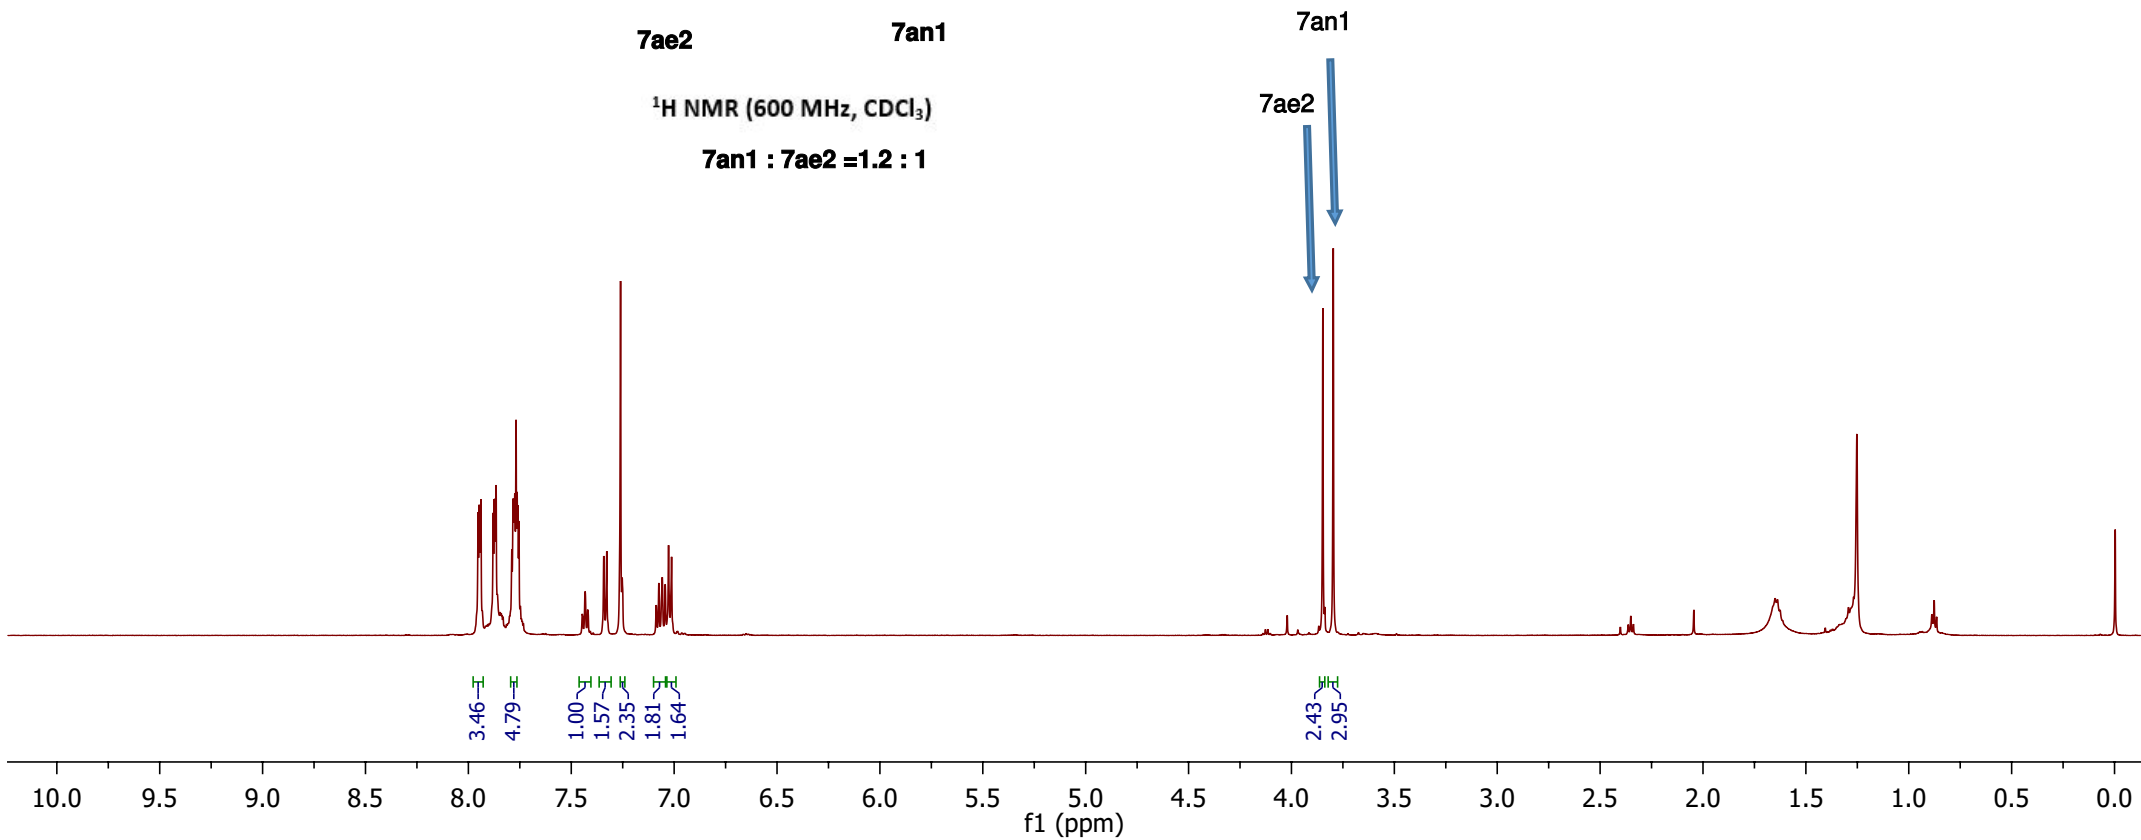

7.950  
7.942  
7.933  
7.925  
7.793  
7.788  
7.783  
7.775  
7.769  
7.764  
7.758  
7.389  
7.372  
7.260  
7.140  
6.867  
6.850  
6.764

3.754  
3.737

2.977  
2.969  
2.959  
2.951

2.516  
2.478  
2.308  
2.164  
2.145  
2.127  
2.053  
2.041

1.611  
1.595  
1.579  
1.572  
1.551  
1.508

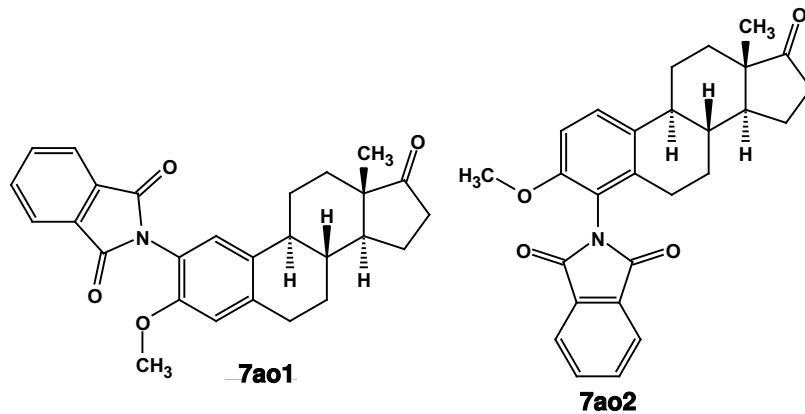

7ao1 : 7ao2 = 1.3 : 1  
Isomeric distribution was measured by  
the integration of the aromatic C-H signals.

<sup>1</sup>H NMR (500 MHz, CDCl<sub>3</sub>)

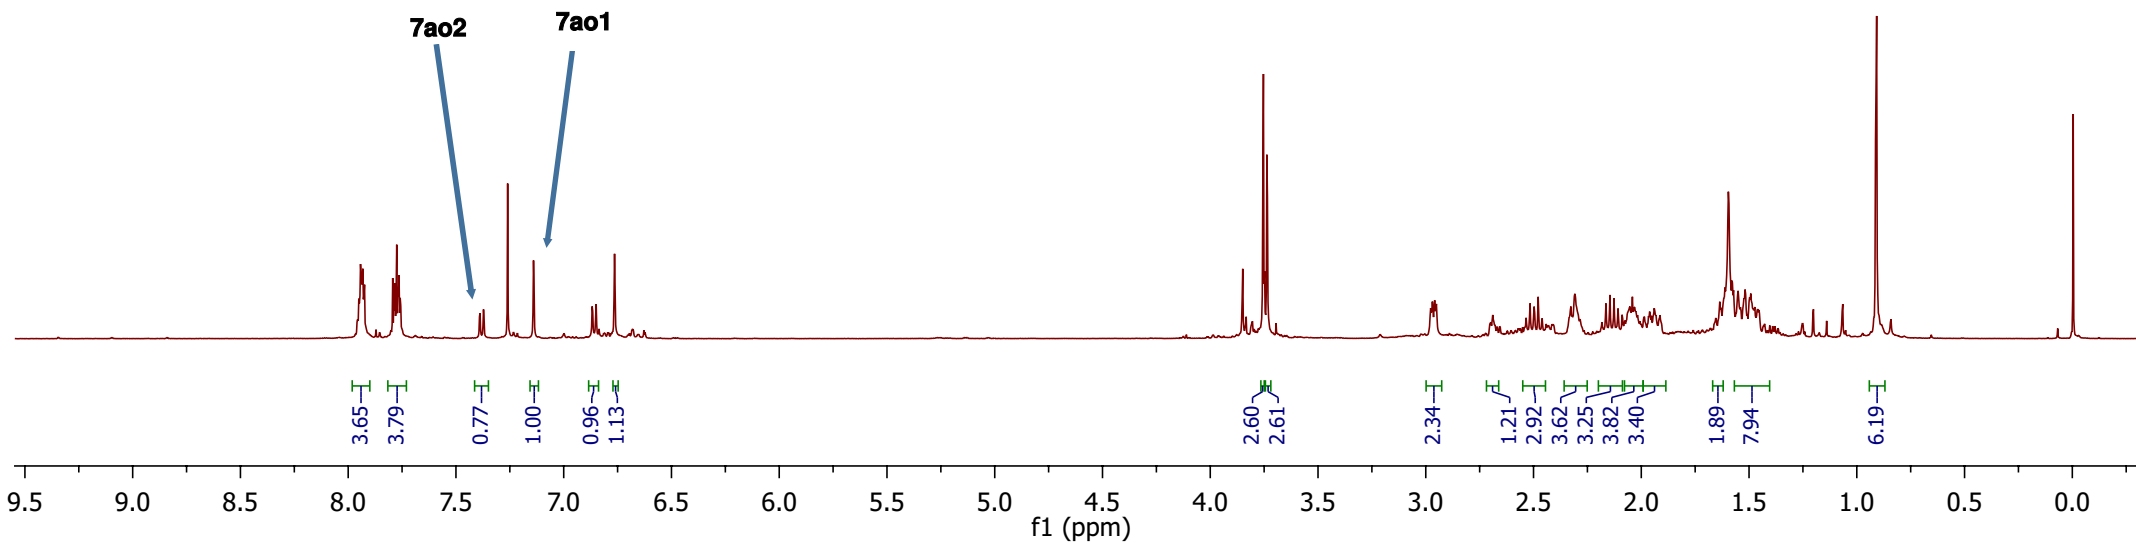

7.956  
7.950  
7.942  
7.933  
7.925

7.793  
7.788  
7.783  
7.775  
7.769  
7.764  
7.758

7.389  
7.372

7.260

7.140

6.867  
6.850

6.764

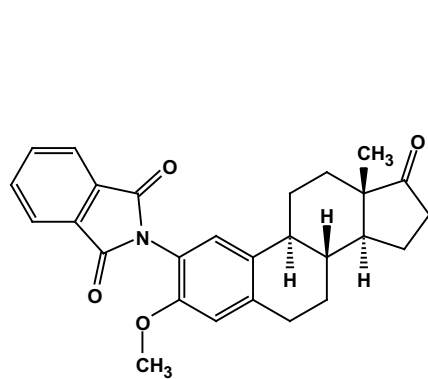

7ao1

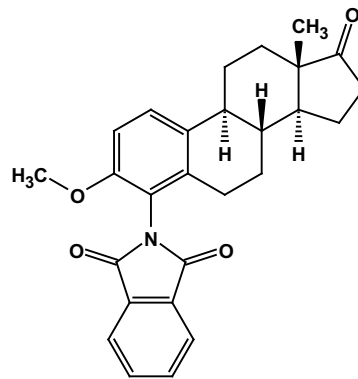

7ao2

Zoom spectra

<sup>1</sup>H NMR (500 MHz, CDCl<sub>3</sub>)

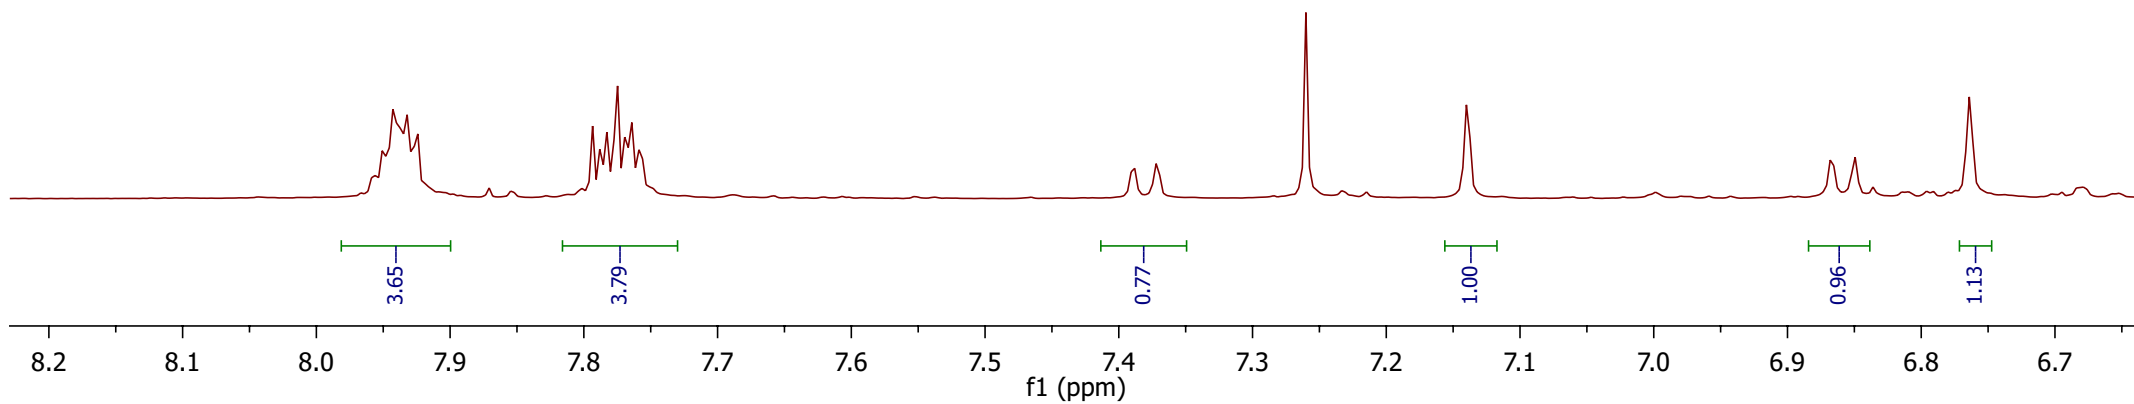

2.977  
2.969  
2.959  
2.951

2.698  
2.689  
2.669  
2.656  
2.622  
2.604

2.534  
2.516  
2.497  
2.478  
2.460  
2.441  
2.327  
2.308  
2.284

2.164  
2.145  
2.127  
2.108  
2.088  
2.053  
2.041  
2.032  
2.018

1.987  
1.966  
1.961  
1.954  
1.939  
1.914  
1.654  
1.636  
1.631  
1.611  
1.595  
1.579  
1.572  
1.551  
1.540  
1.518  
1.509  
1.497  
1.492  
1.474  
1.461  
1.455  
1.428  
1.404

0.909

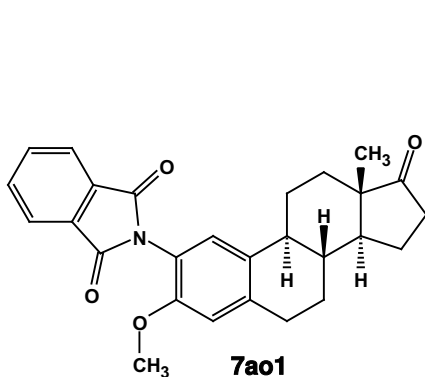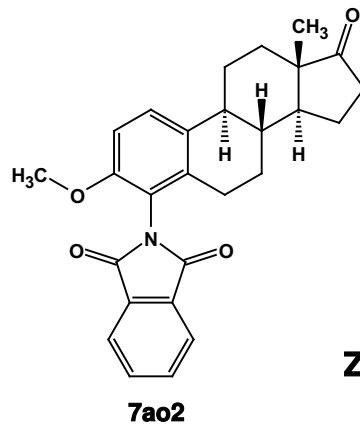

**Zoom Spectra**

<sup>1</sup>H NMR (500 MHz, CDCl<sub>3</sub>)

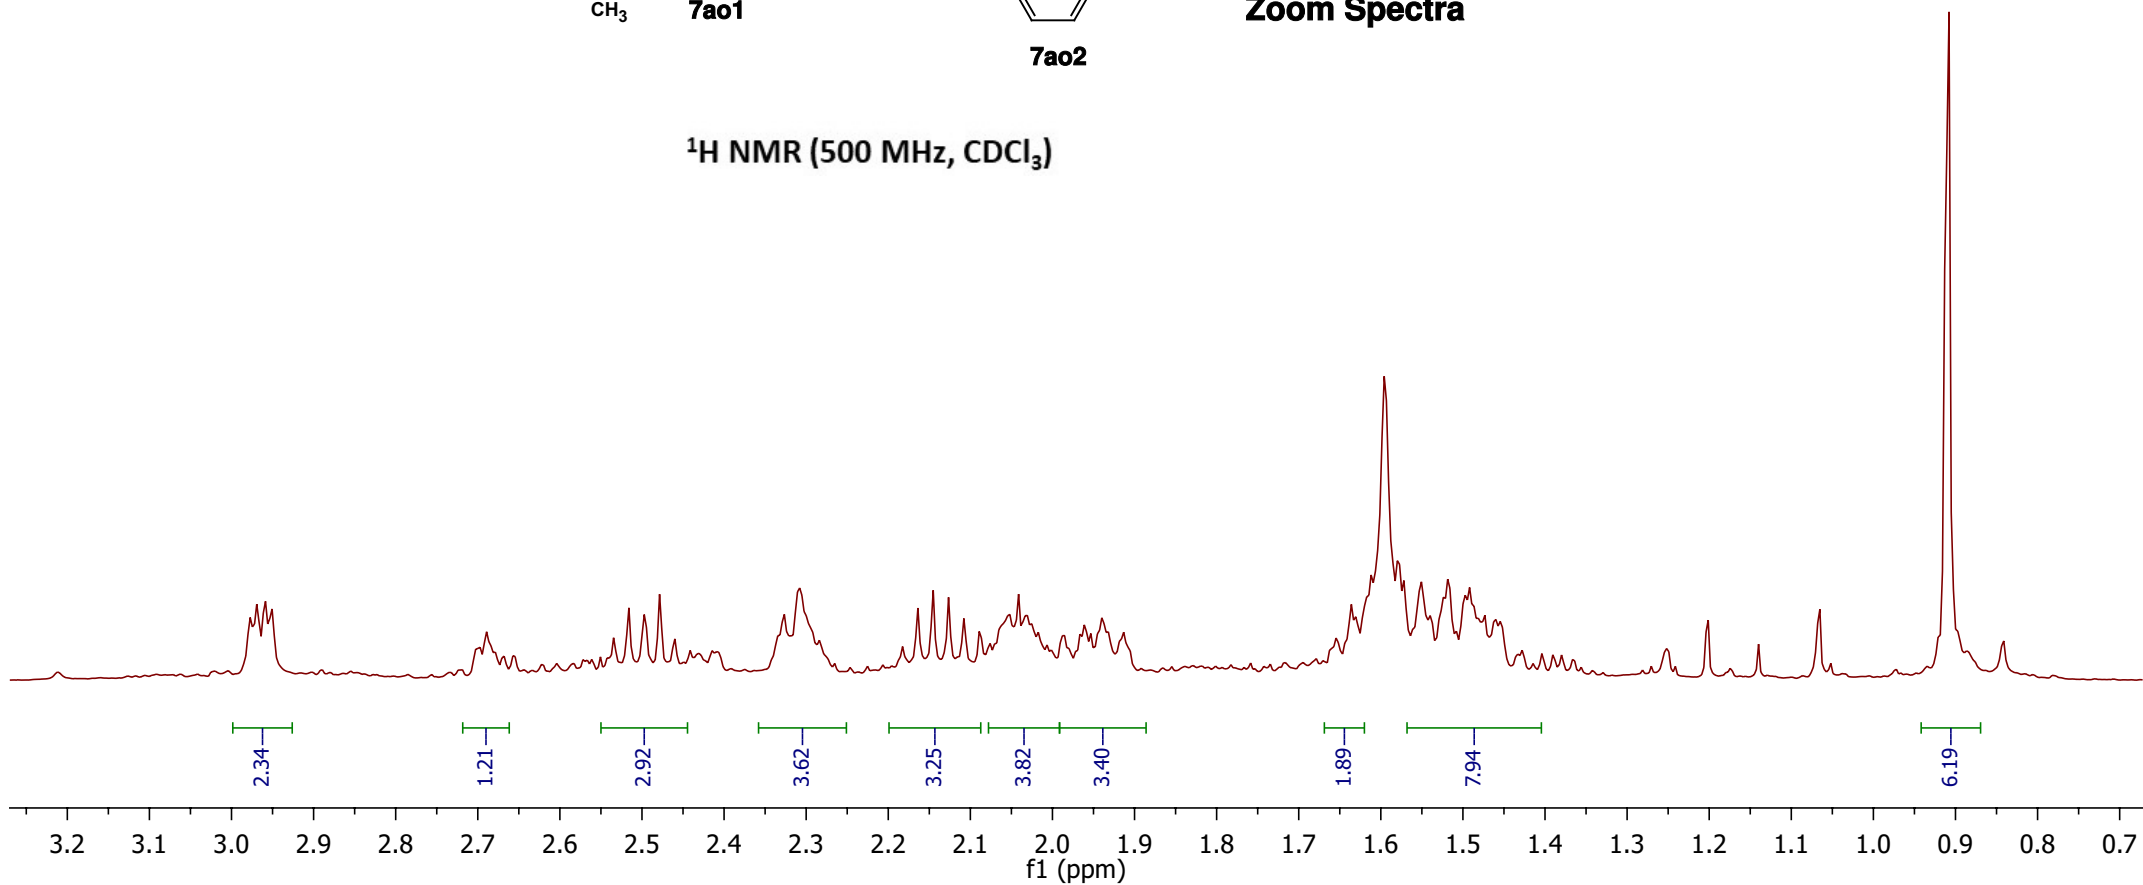

221.003  
220.944

167.869  
167.787

153.829  
153.337  
139.517  
137.028  
134.250  
134.213  
133.170  
132.582  
132.487  
132.436  
127.744  
127.052  
123.805  
123.769  
117.852  
112.593  
109.270

77.414  
77.460  
76.906  
56.023  
55.989  
50.467  
50.425  
48.118  
48.080  
44.060  
43.894  
38.093  
37.666  
36.005  
35.978  
31.653  
31.601  
29.950  
26.586  
26.061  
26.026  
25.929  
25.229  
21.711  
21.674  
13.976

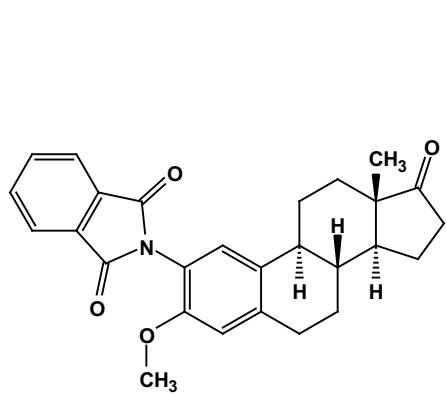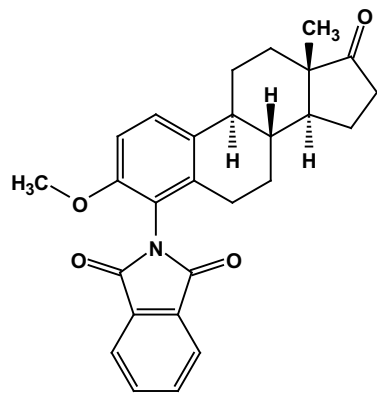

**7ao2**

<sup>13</sup>C NMR (125 MHz, CDCl<sub>3</sub>)

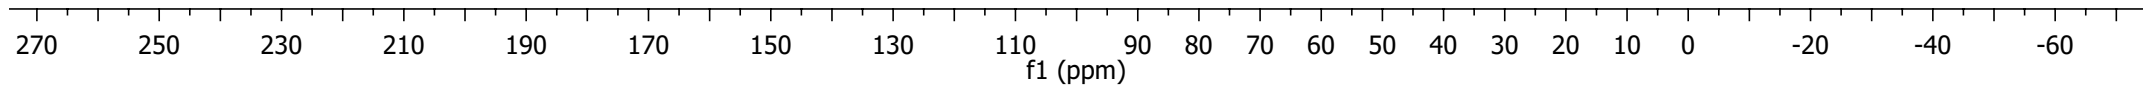

221.003  
220.944

167.869  
167.787

153.829  
153.337

139.517  
137.028  
134.250  
134.213  
133.170  
132.582  
132.487  
132.436

127.744  
127.052  
123.805  
123.769

117.852

112.593

109.270



7ao1



7ao2

### Zoom Spectra

<sup>13</sup>C NMR (125 MHz, CDCl<sub>3</sub>)

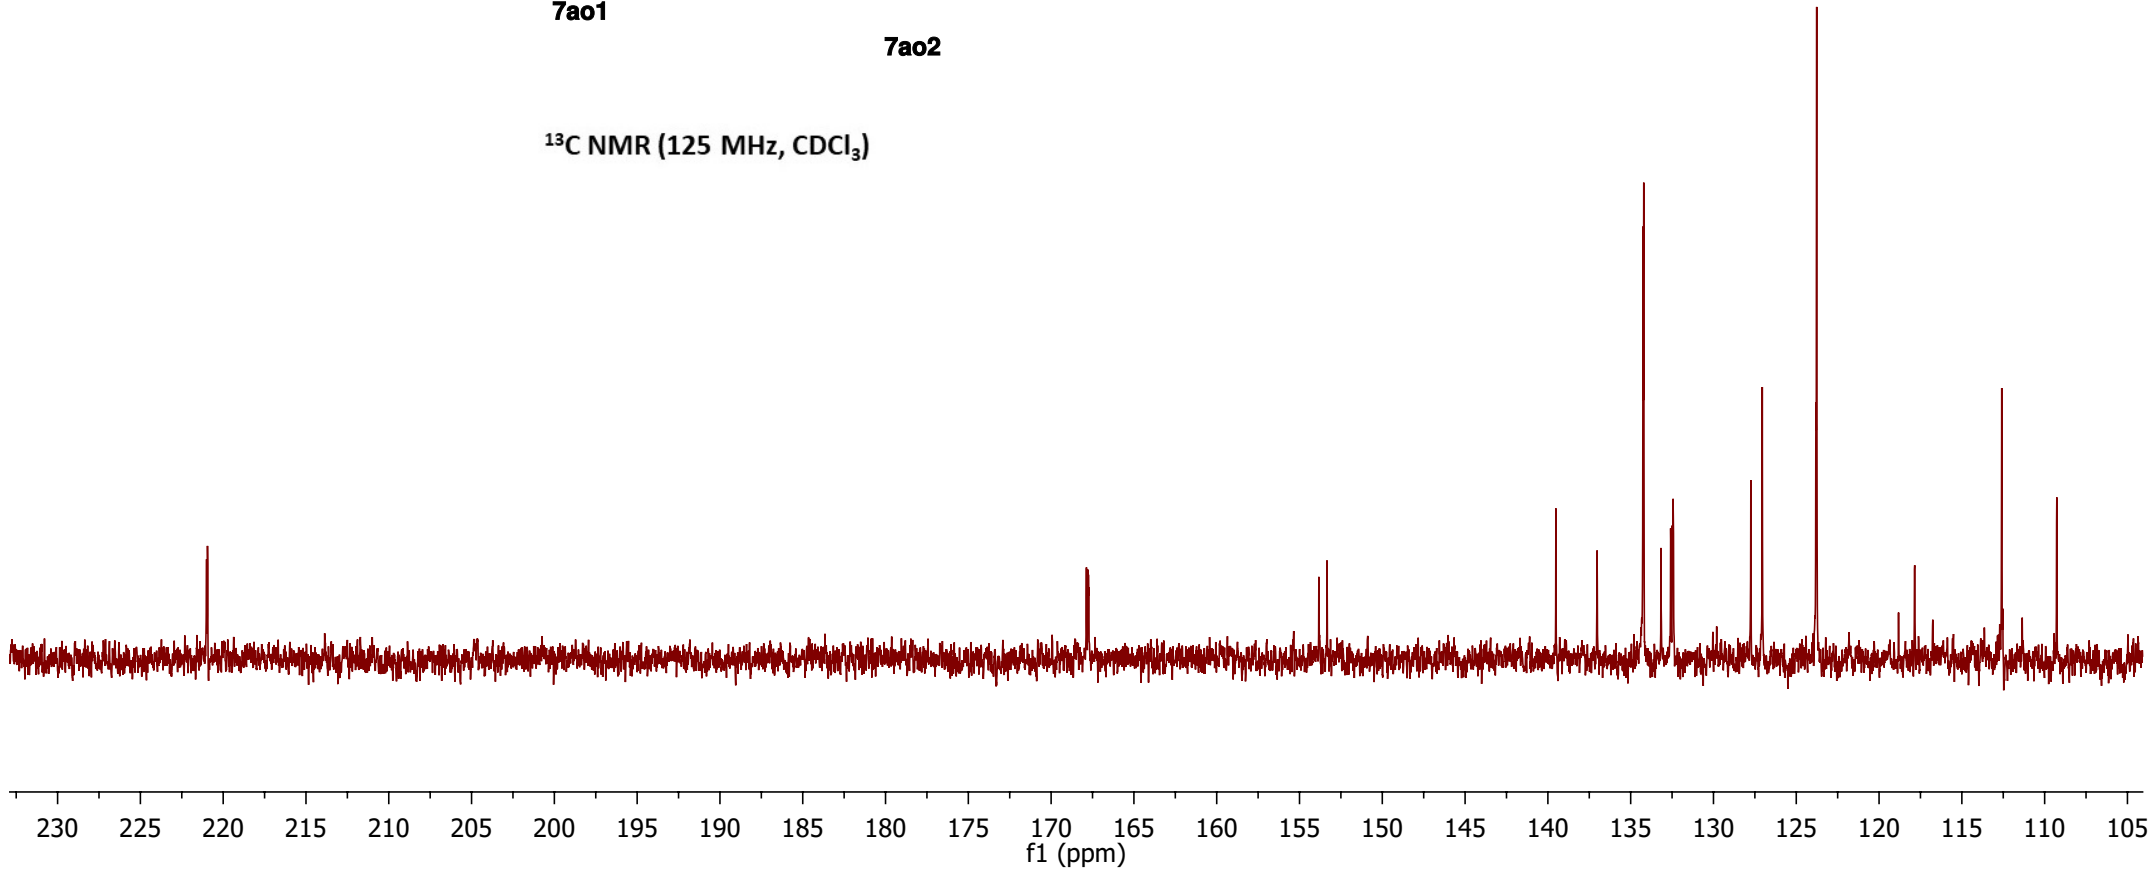

56.023  
55.989

50.467  
50.425

48.118  
48.080

44.060  
43.894

38.093  
37.666

36.005  
35.978

31.653  
31.601

29.950

26.586  
26.061  
26.026  
25.929  
25.229

21.711  
21.674

13.976

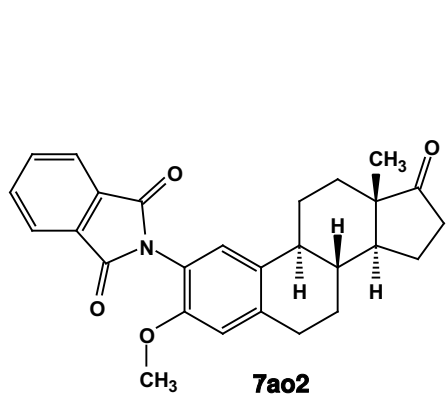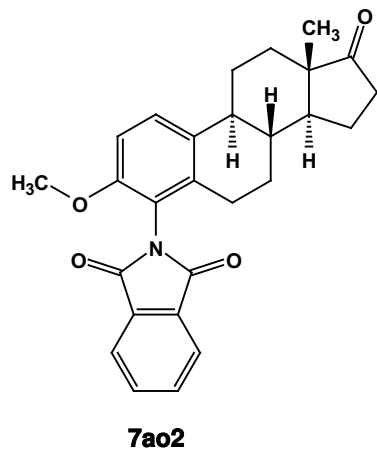

zoom Spectra

<sup>13</sup>C NMR (125 MHz, CDCl<sub>3</sub>)

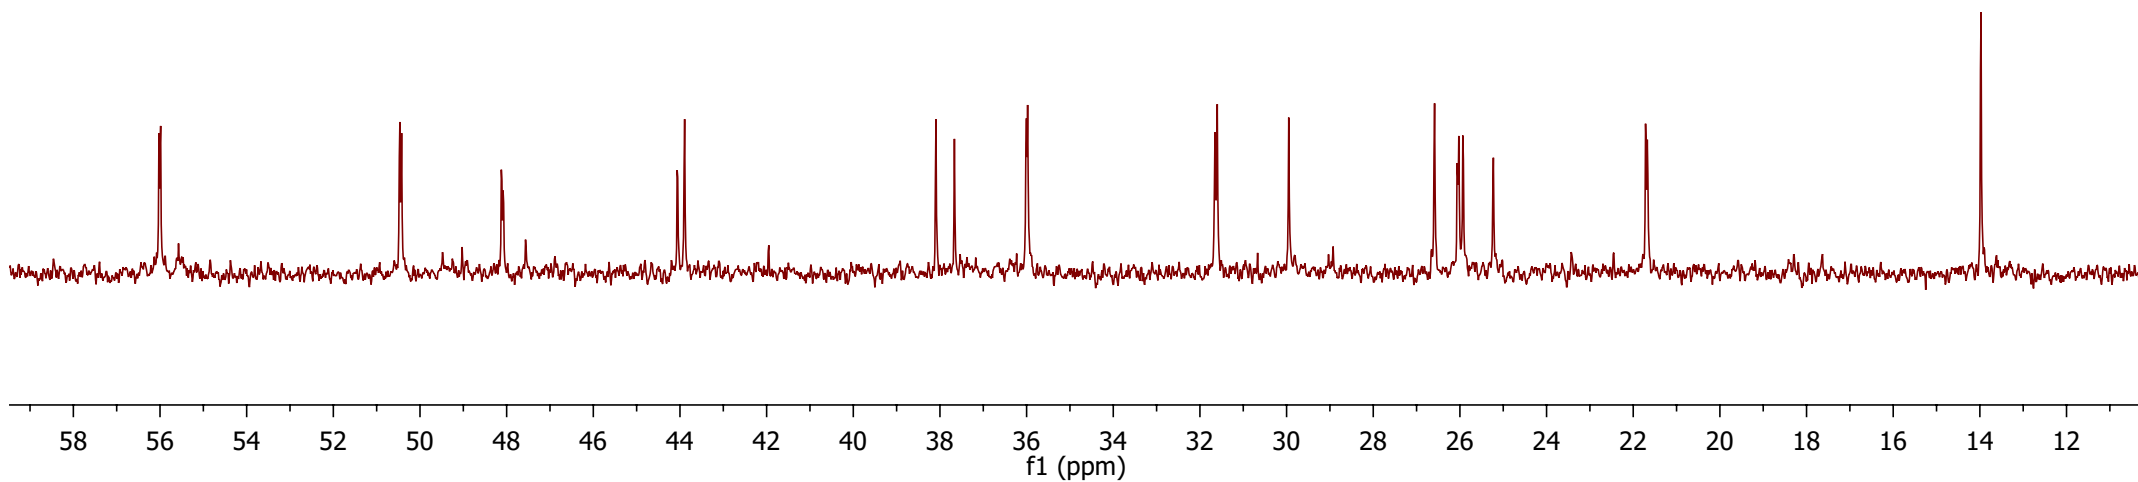



7.951  
7.945  
7.940  
7.935  
7.790  
7.783  
7.778  
7.772

7.260  
6.946  
6.734

3.971  
3.959  
3.948  
3.678  
3.663  
3.650  
3.543

2.294  
2.196  
2.145  
2.137

1.752  
1.748  
1.740  
1.728  
1.722  
1.717  
1.728

0.892

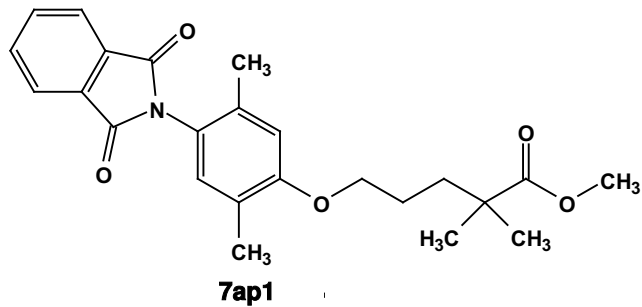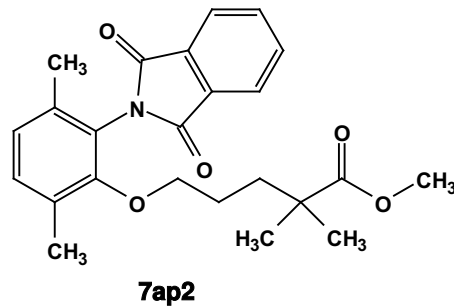

7ap1 : 7ap2 = 4 : 1

Isomeric distribution was measured by the integration of the aromatic C-H signals.

<sup>1</sup>H NMR (500 MHz, CDCl<sub>3</sub>)

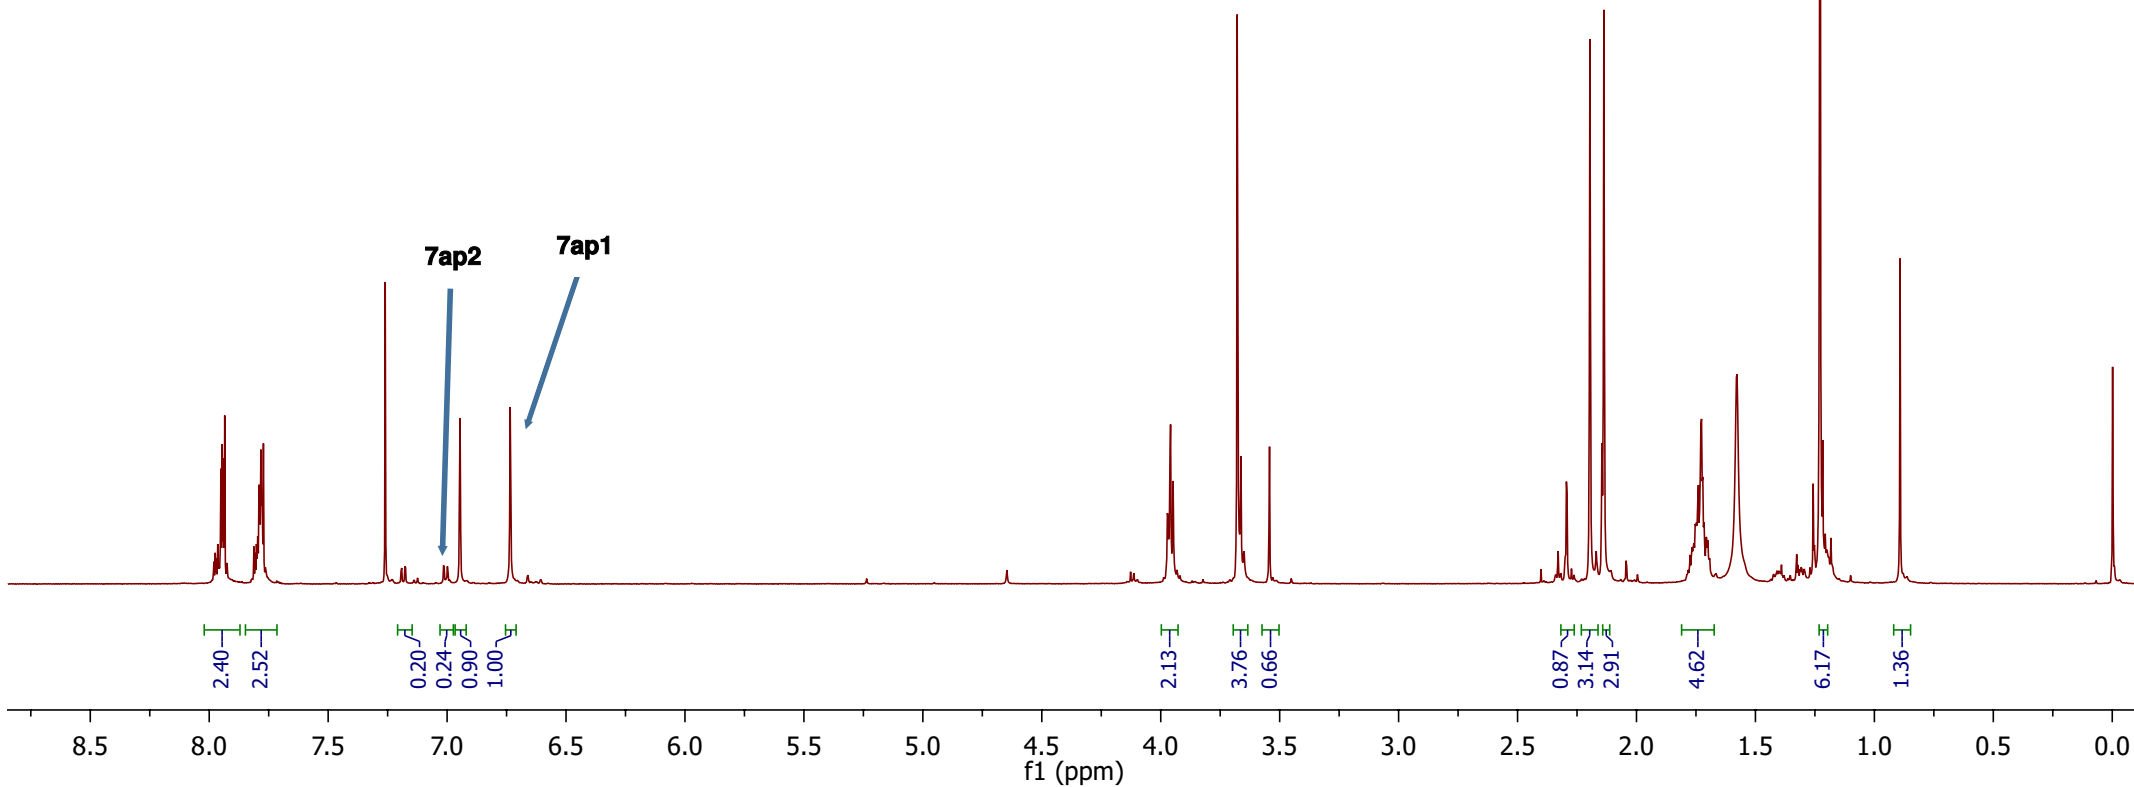

—178.419  
—167.969  
—157.845

134.949  
134.413  
134.348  
132.446  
132.260  
130.525  
125.852  
125.732  
123.893  
123.813  
122.287  
—113.211

77.414  
77.166  
76.907  
73.802  
—68.354

51.901  
51.736

42.264  
41.852  
—37.234  
—32.271

25.355  
25.279  
25.023  
18.963  
17.762  
16.309  
15.885

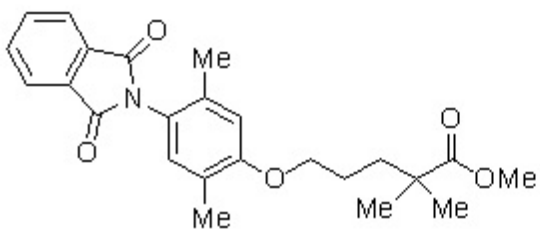

**7ap1**

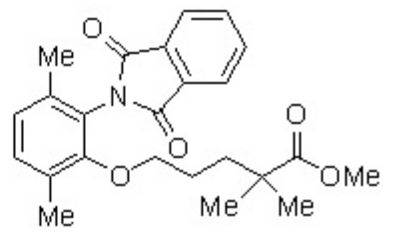

**7ap2**

**<sup>13</sup>C NMR (125 MHz, CDCl<sub>3</sub>)**

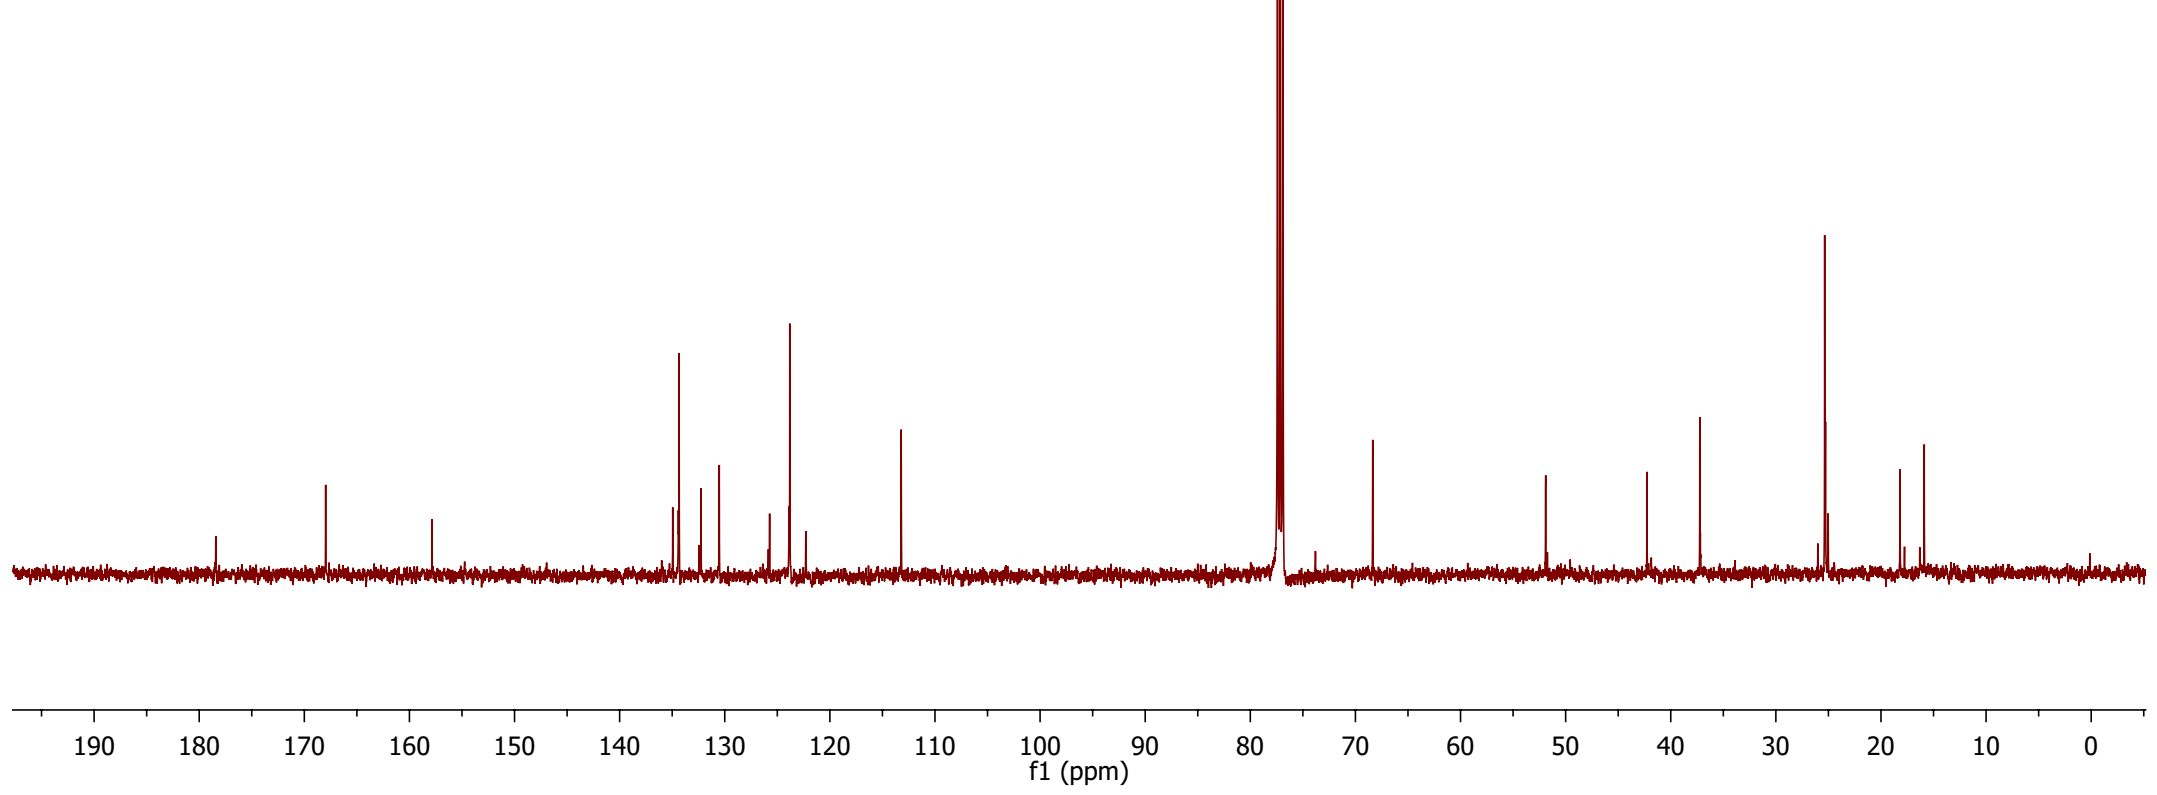

—178.419

—167.969

—157.845

134.949  
134.413  
134.348  
132.446  
132.260  
130.525

125.852  
125.732  
123.893  
123.813  
122.287

—113.211

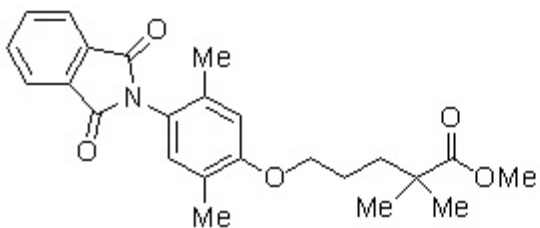

**7ap1**

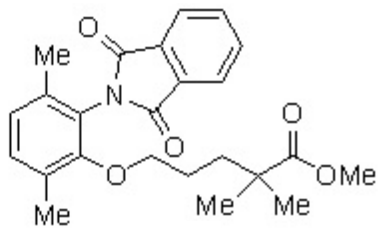

**7ap2**

<sup>13</sup>C NMR (125 MHz, CDCl<sub>3</sub>)

**Zoom Spectra**

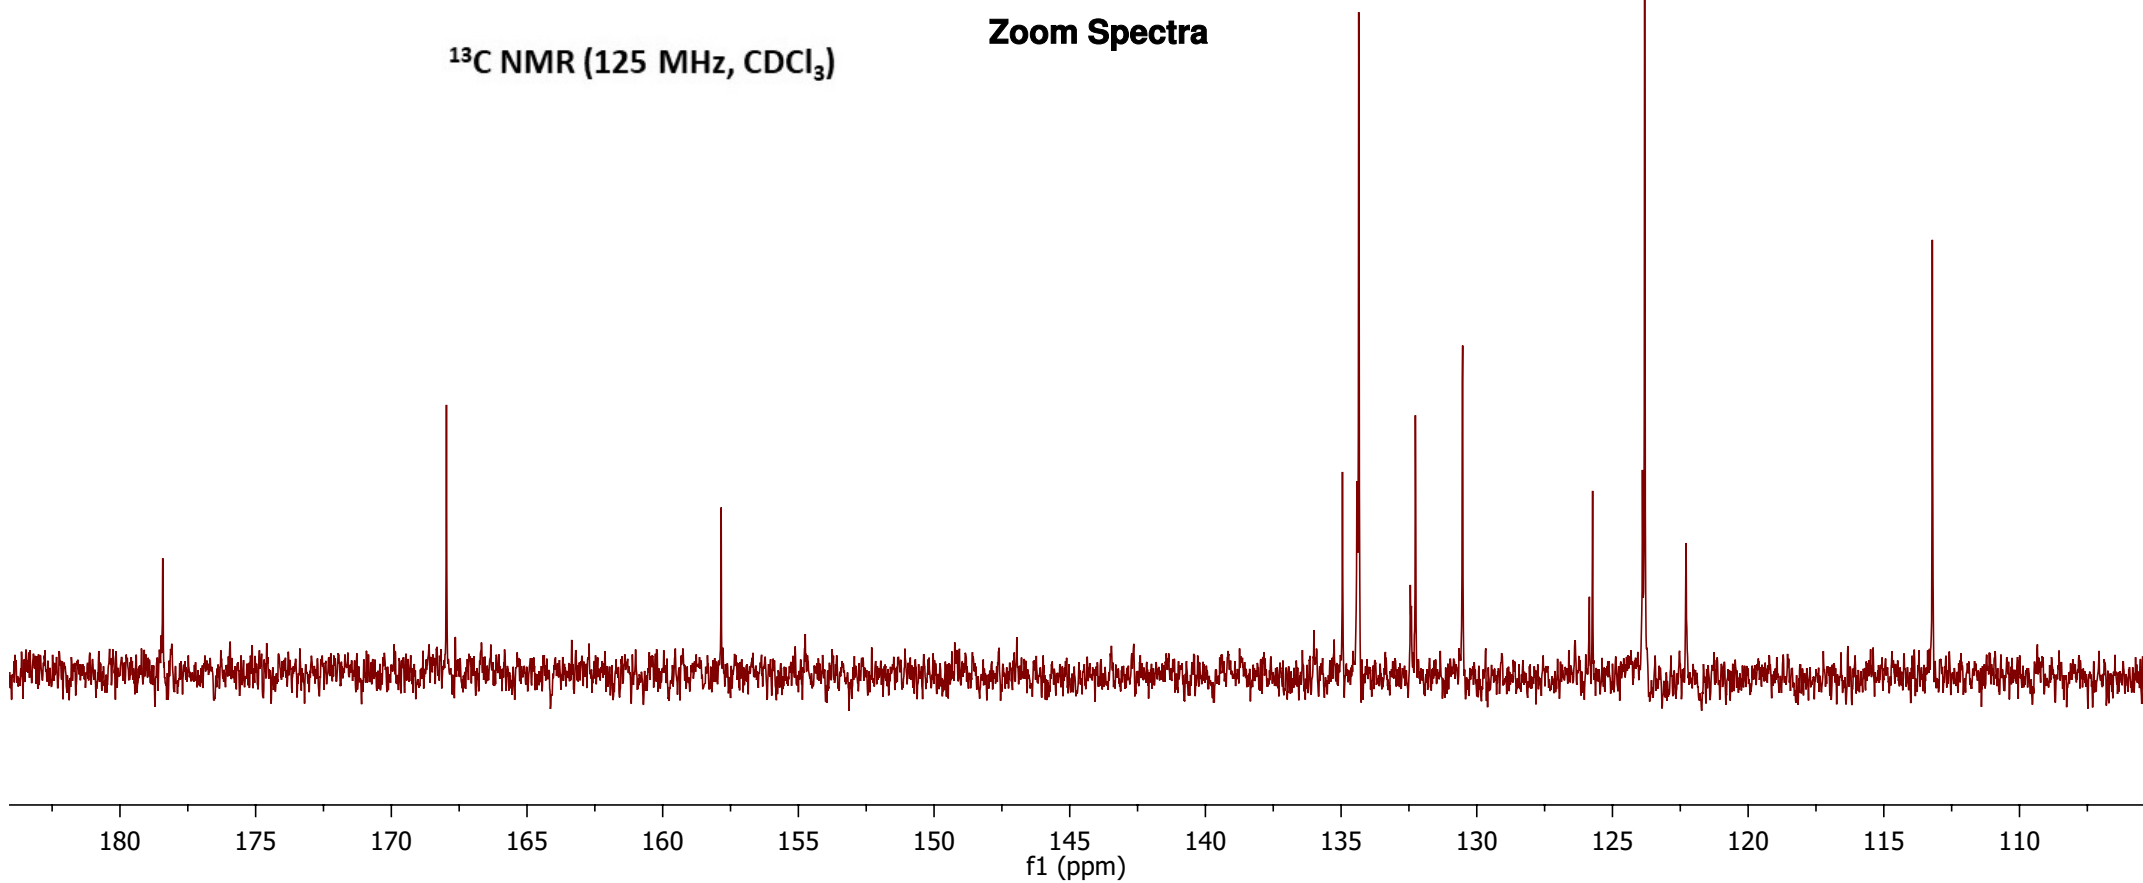

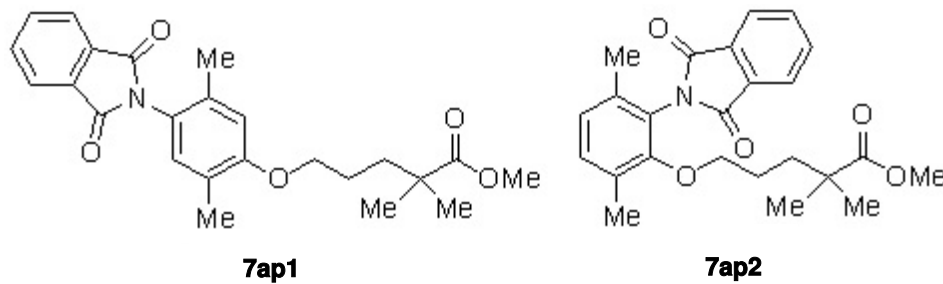

<sup>13</sup>C NMR (125 MHz, CDCl<sub>3</sub>)

**Zoom Spectra**

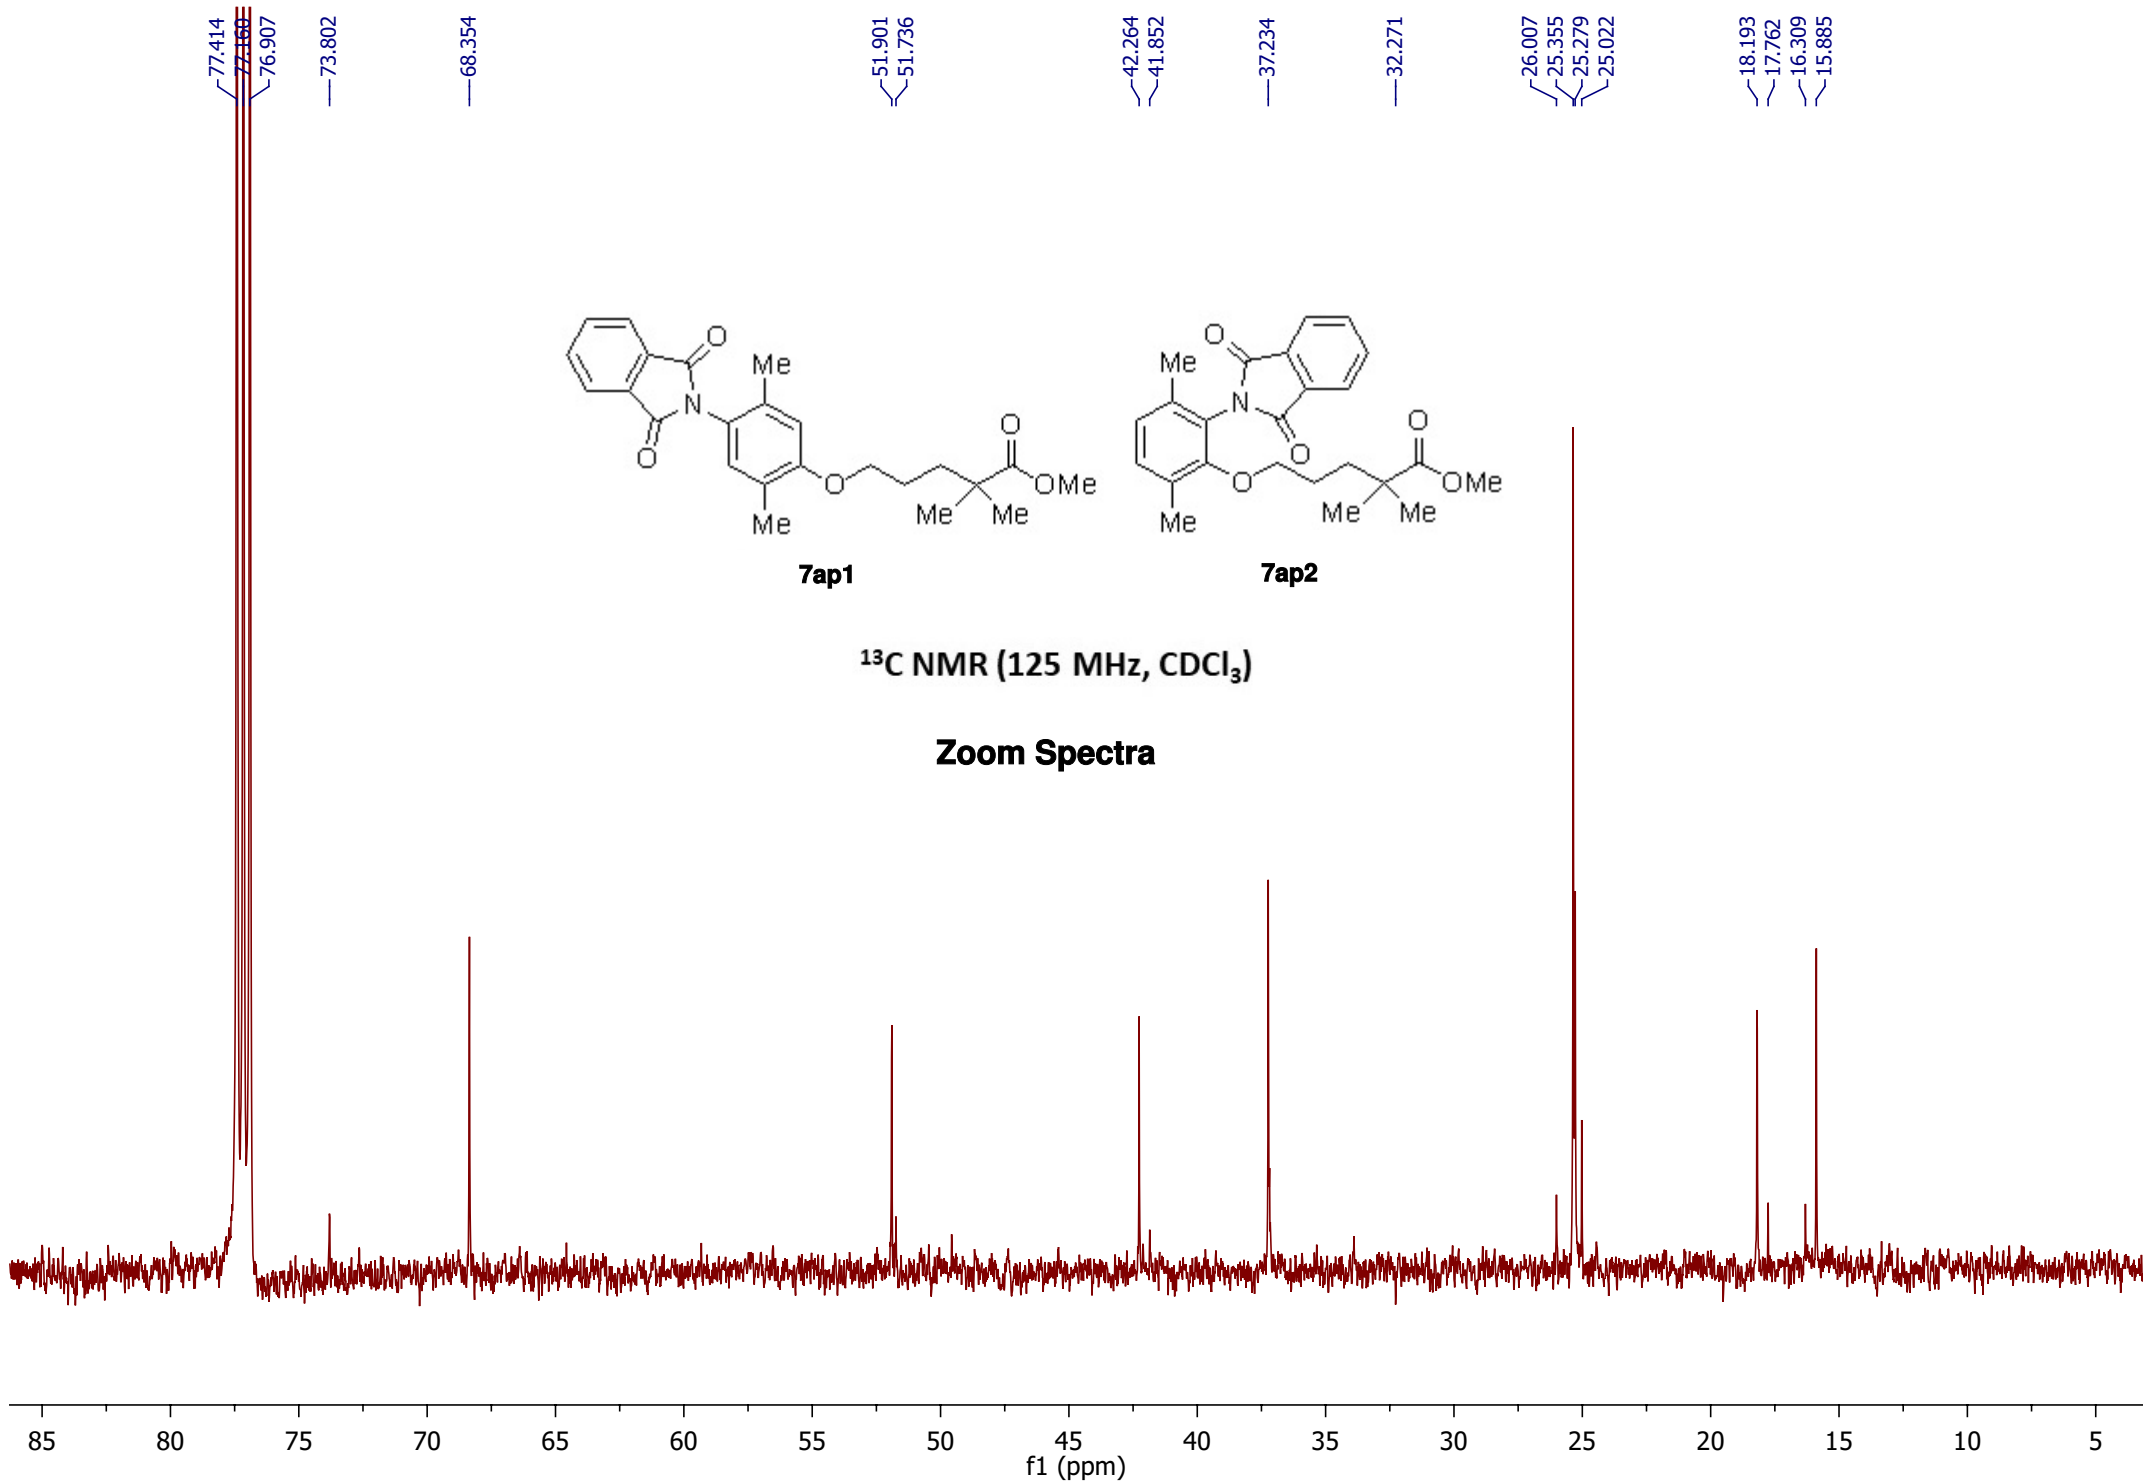

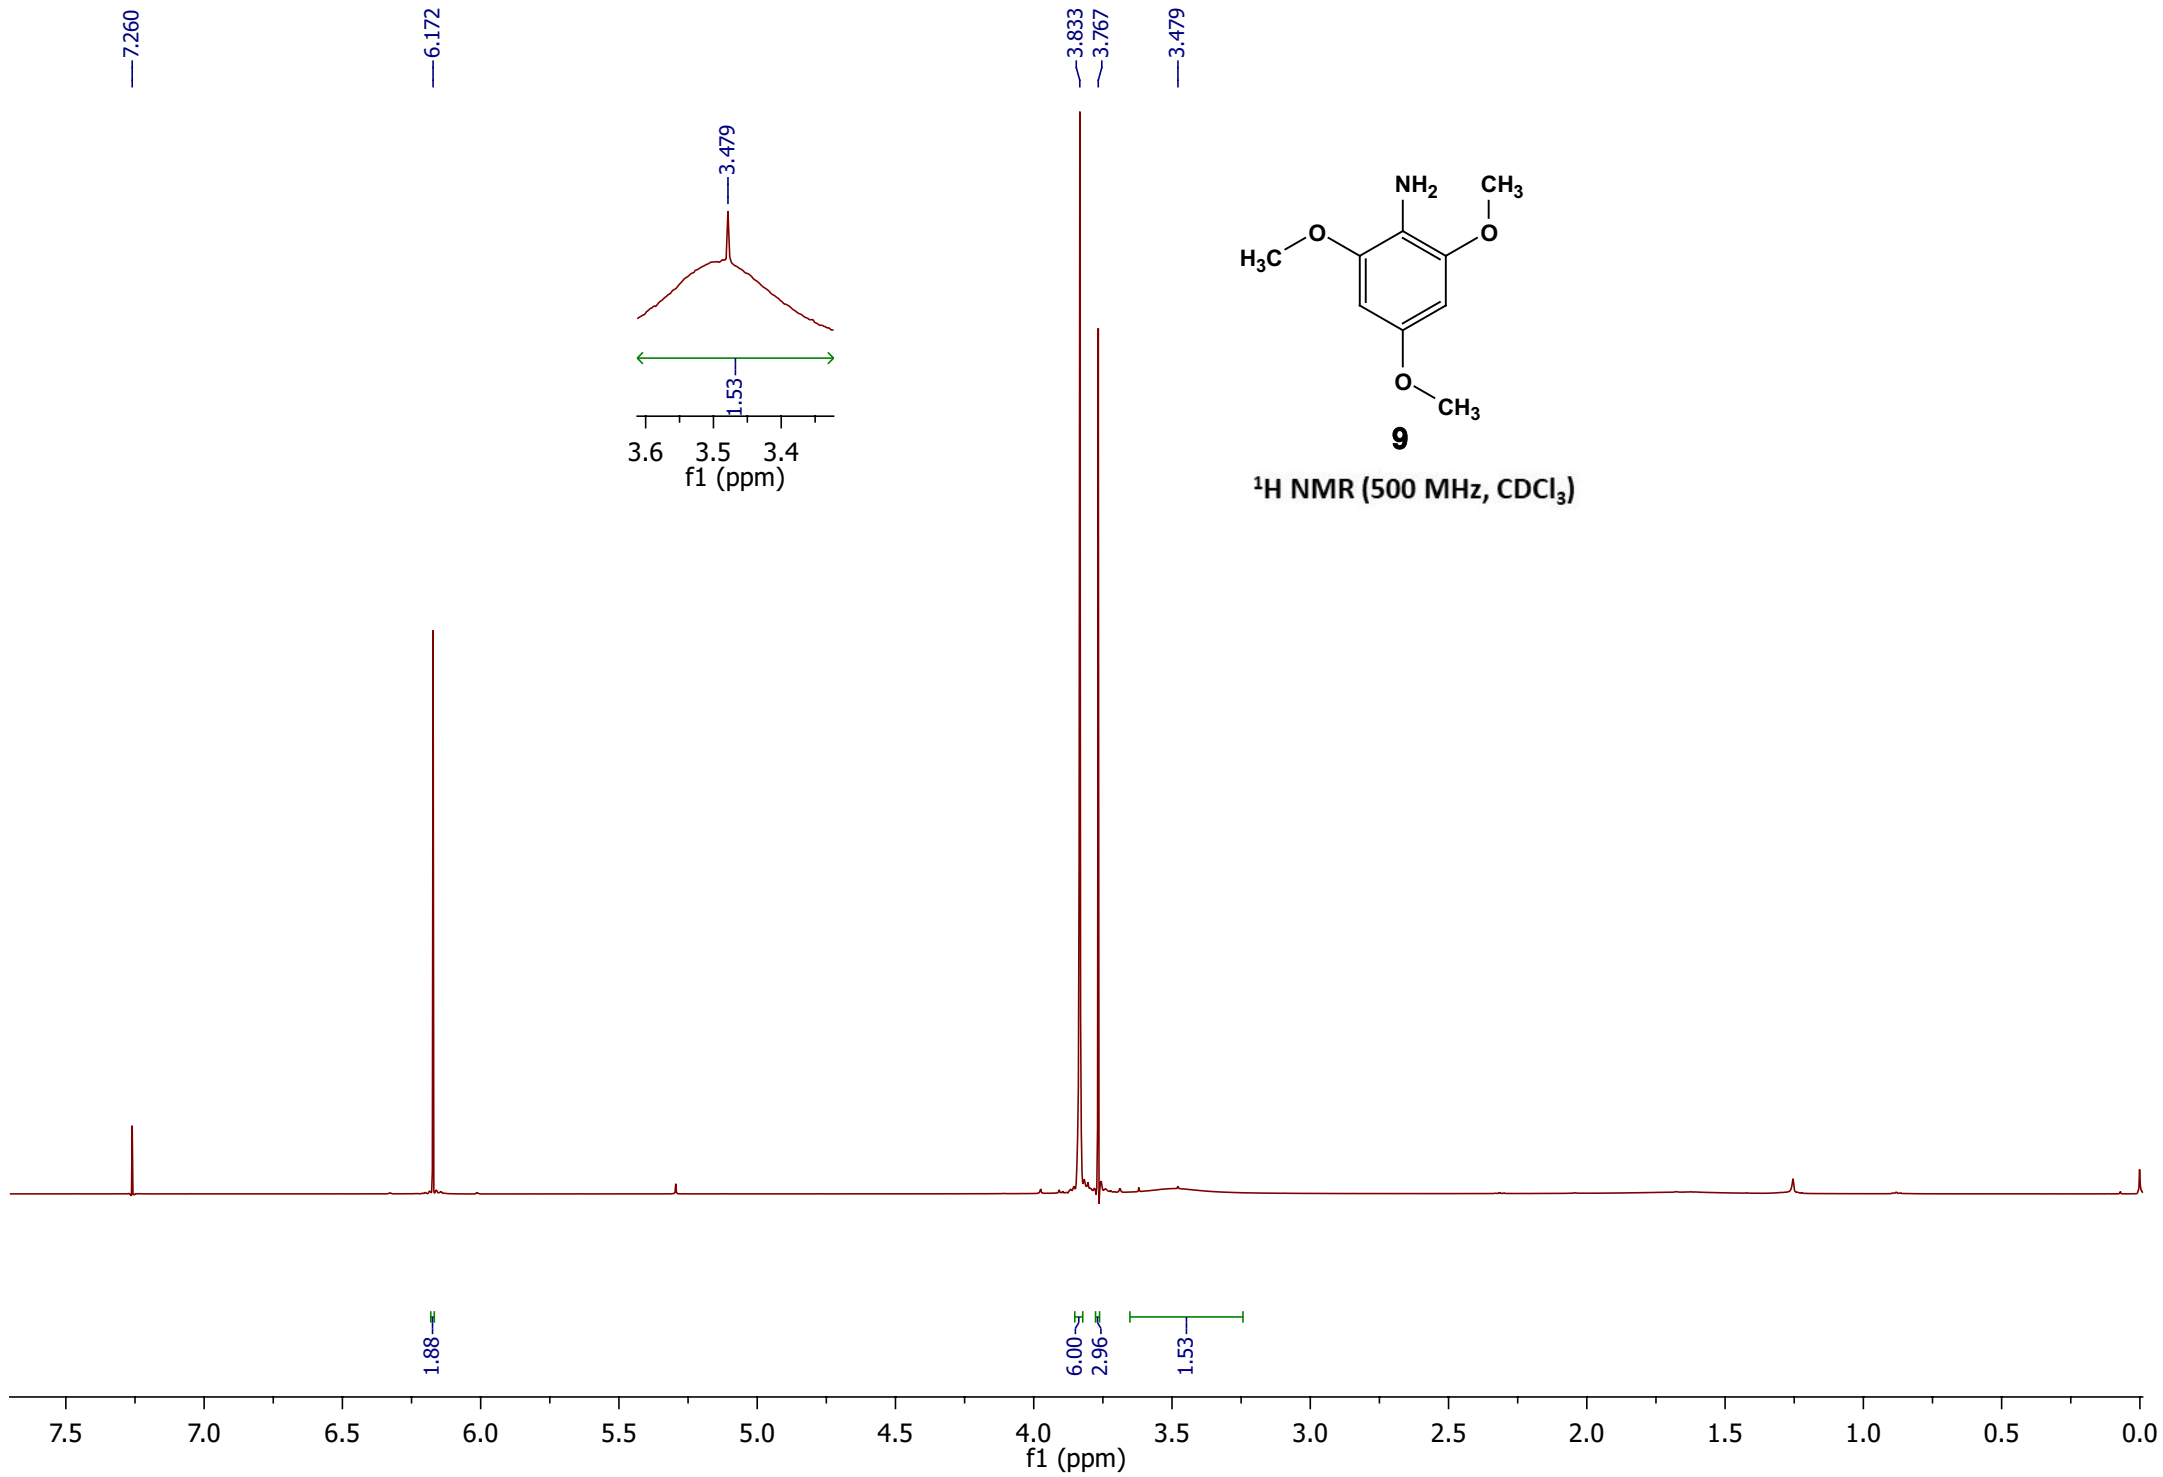

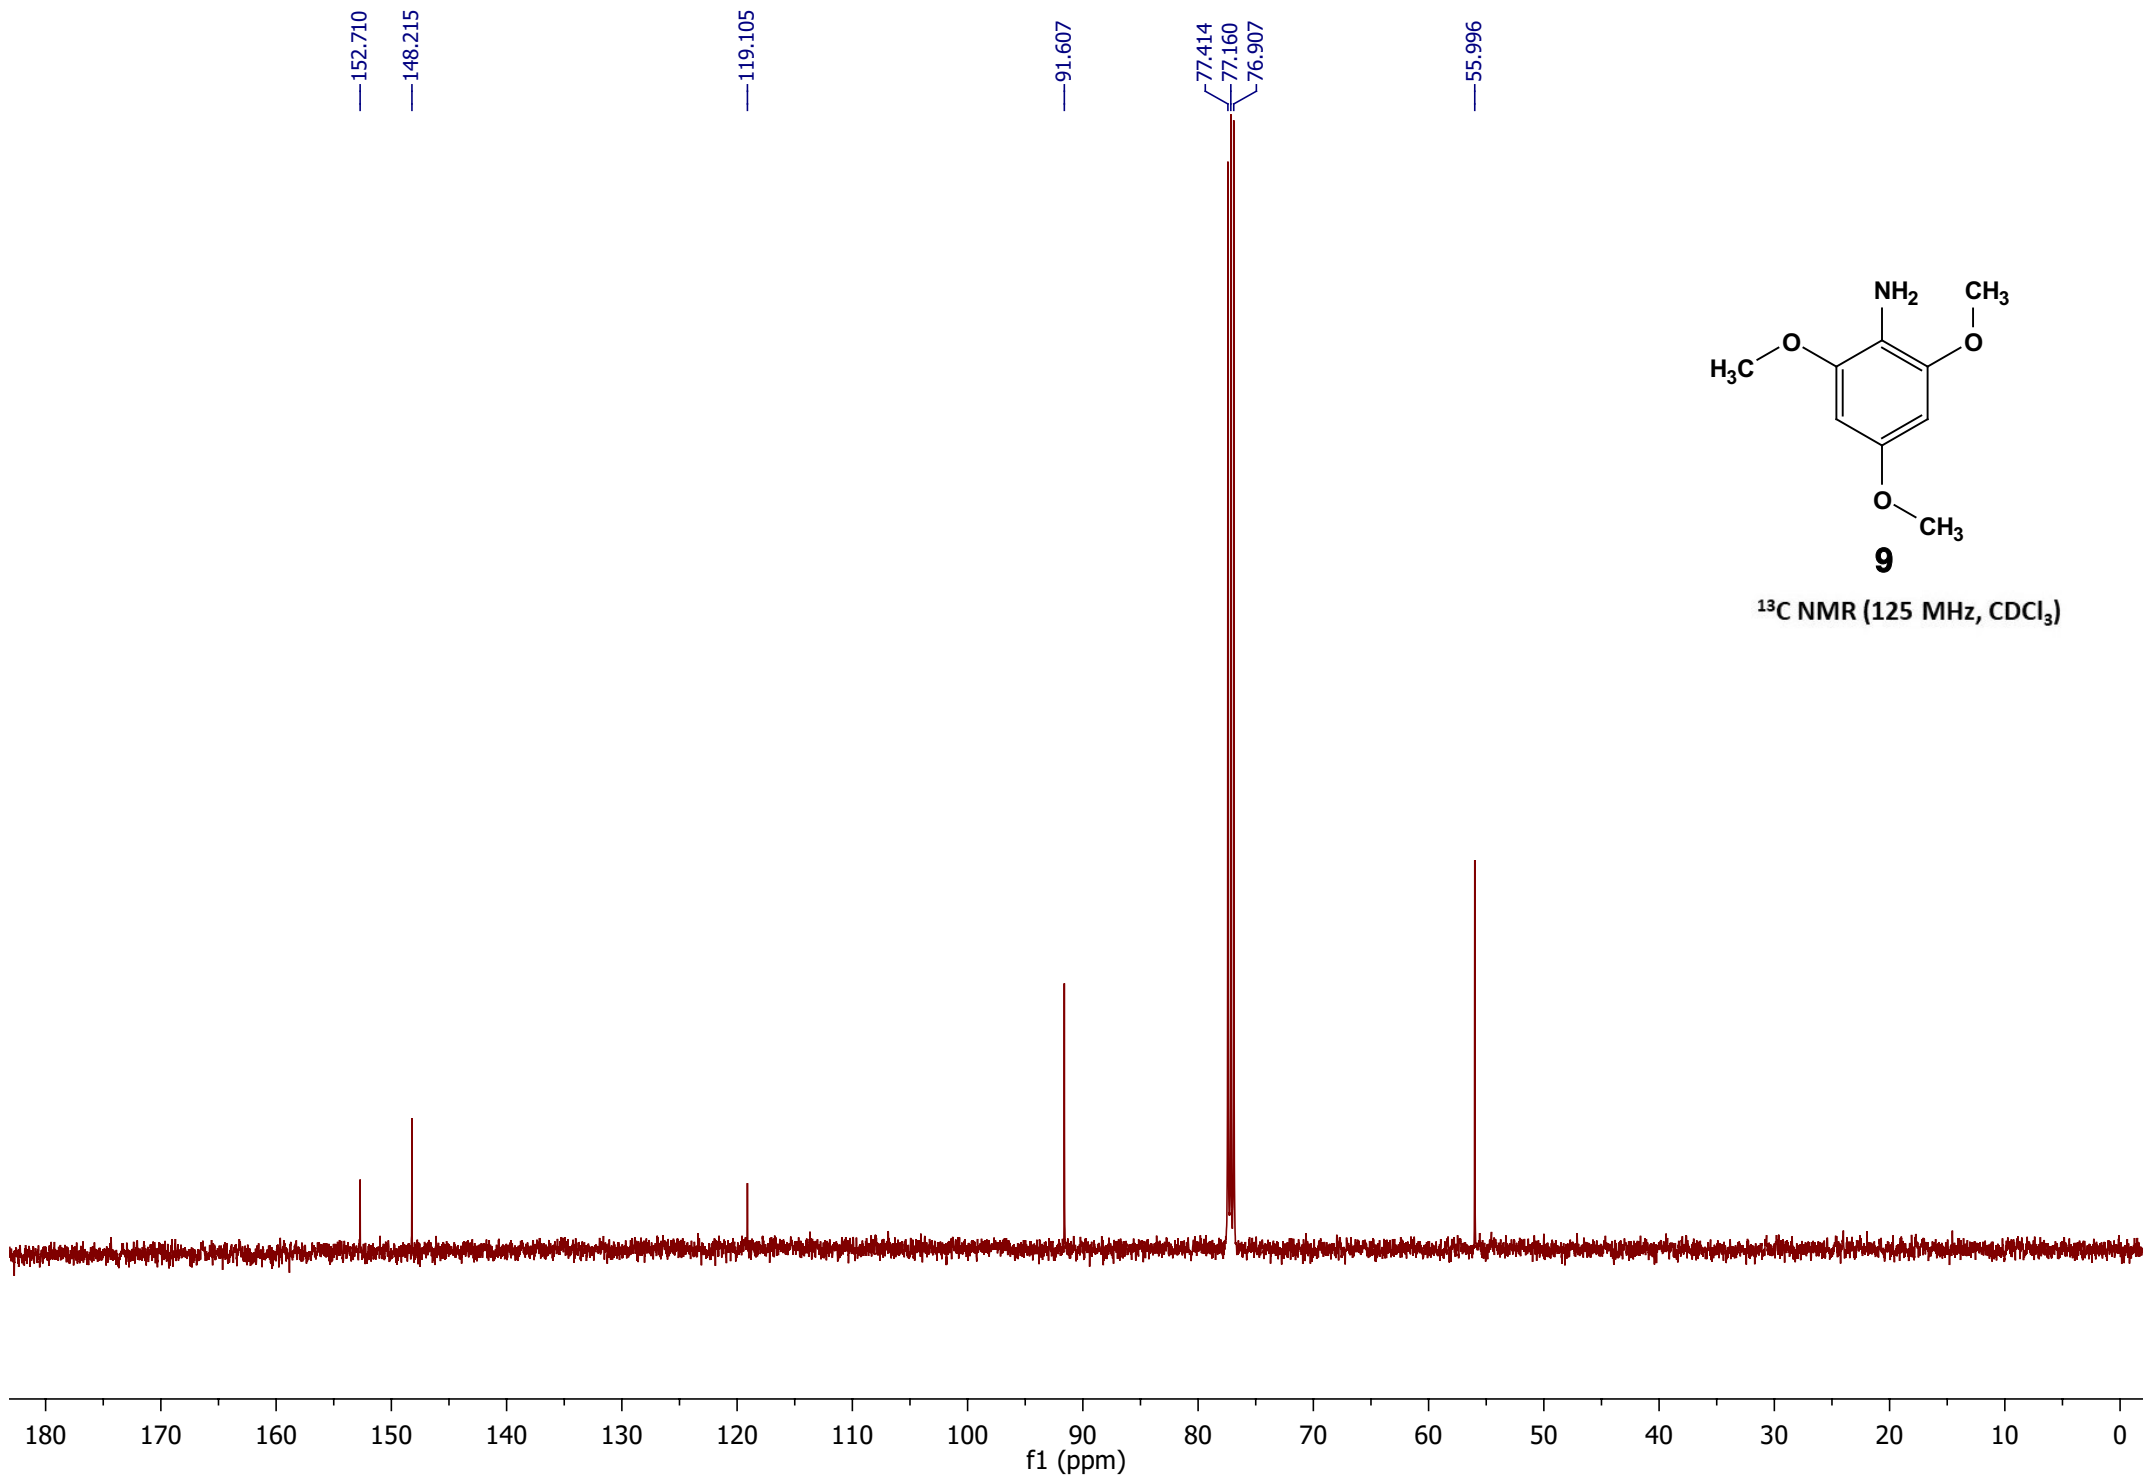

7.914  
7.882

7.441  
7.425  
7.260

6.505  
6.500  
6.484  
6.447  
6.442  
6.413  
6.409

4.263  
4.249  
4.236  
4.220  
3.863  
3.831

1.337  
1.324  
1.308

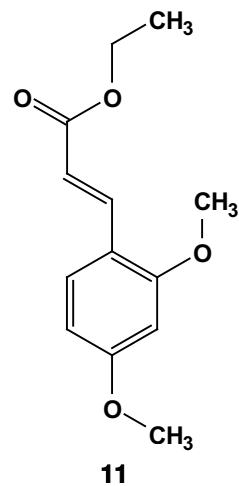

<sup>1</sup>H NMR (500 MHz, CDCl<sub>3</sub>)

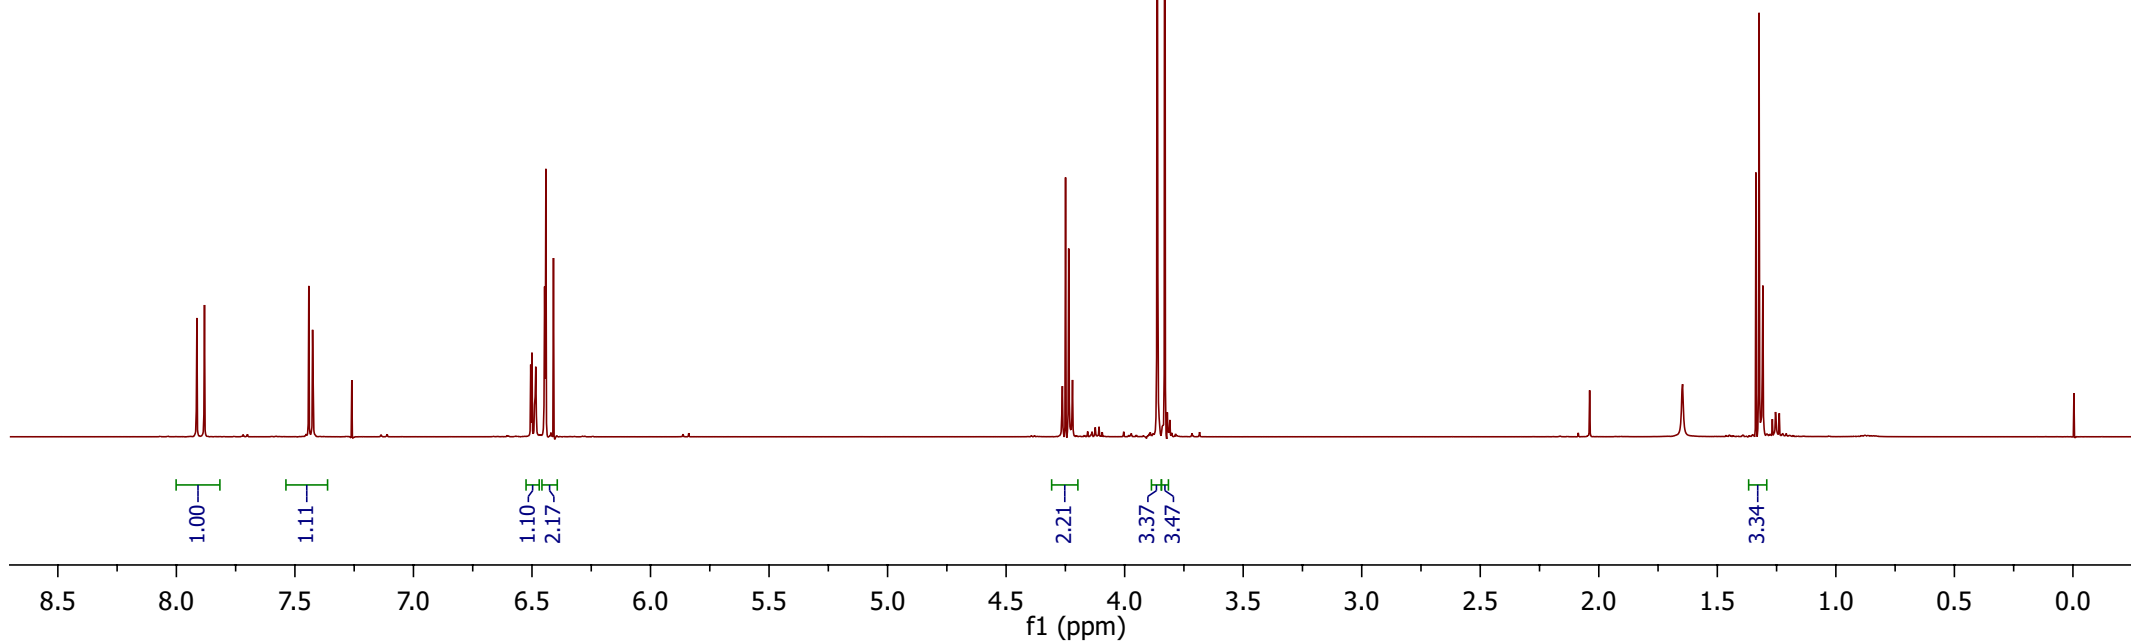

7.260  
7.049  
7.033

6.436  
6.431  
6.409  
6.405  
6.393  
6.388

4.137  
4.124  
4.108  
4.095  
3.796  
3.785

2.878  
2.862  
2.847  
2.573  
2.557  
2.543

1.251  
1.236  
1.223

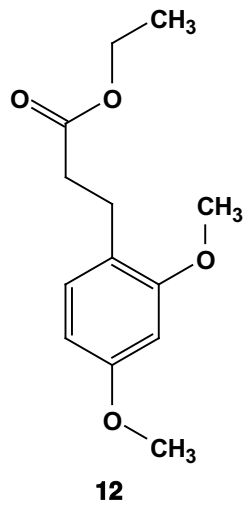

<sup>1</sup>H NMR (500 MHz, CDCl<sub>3</sub>)

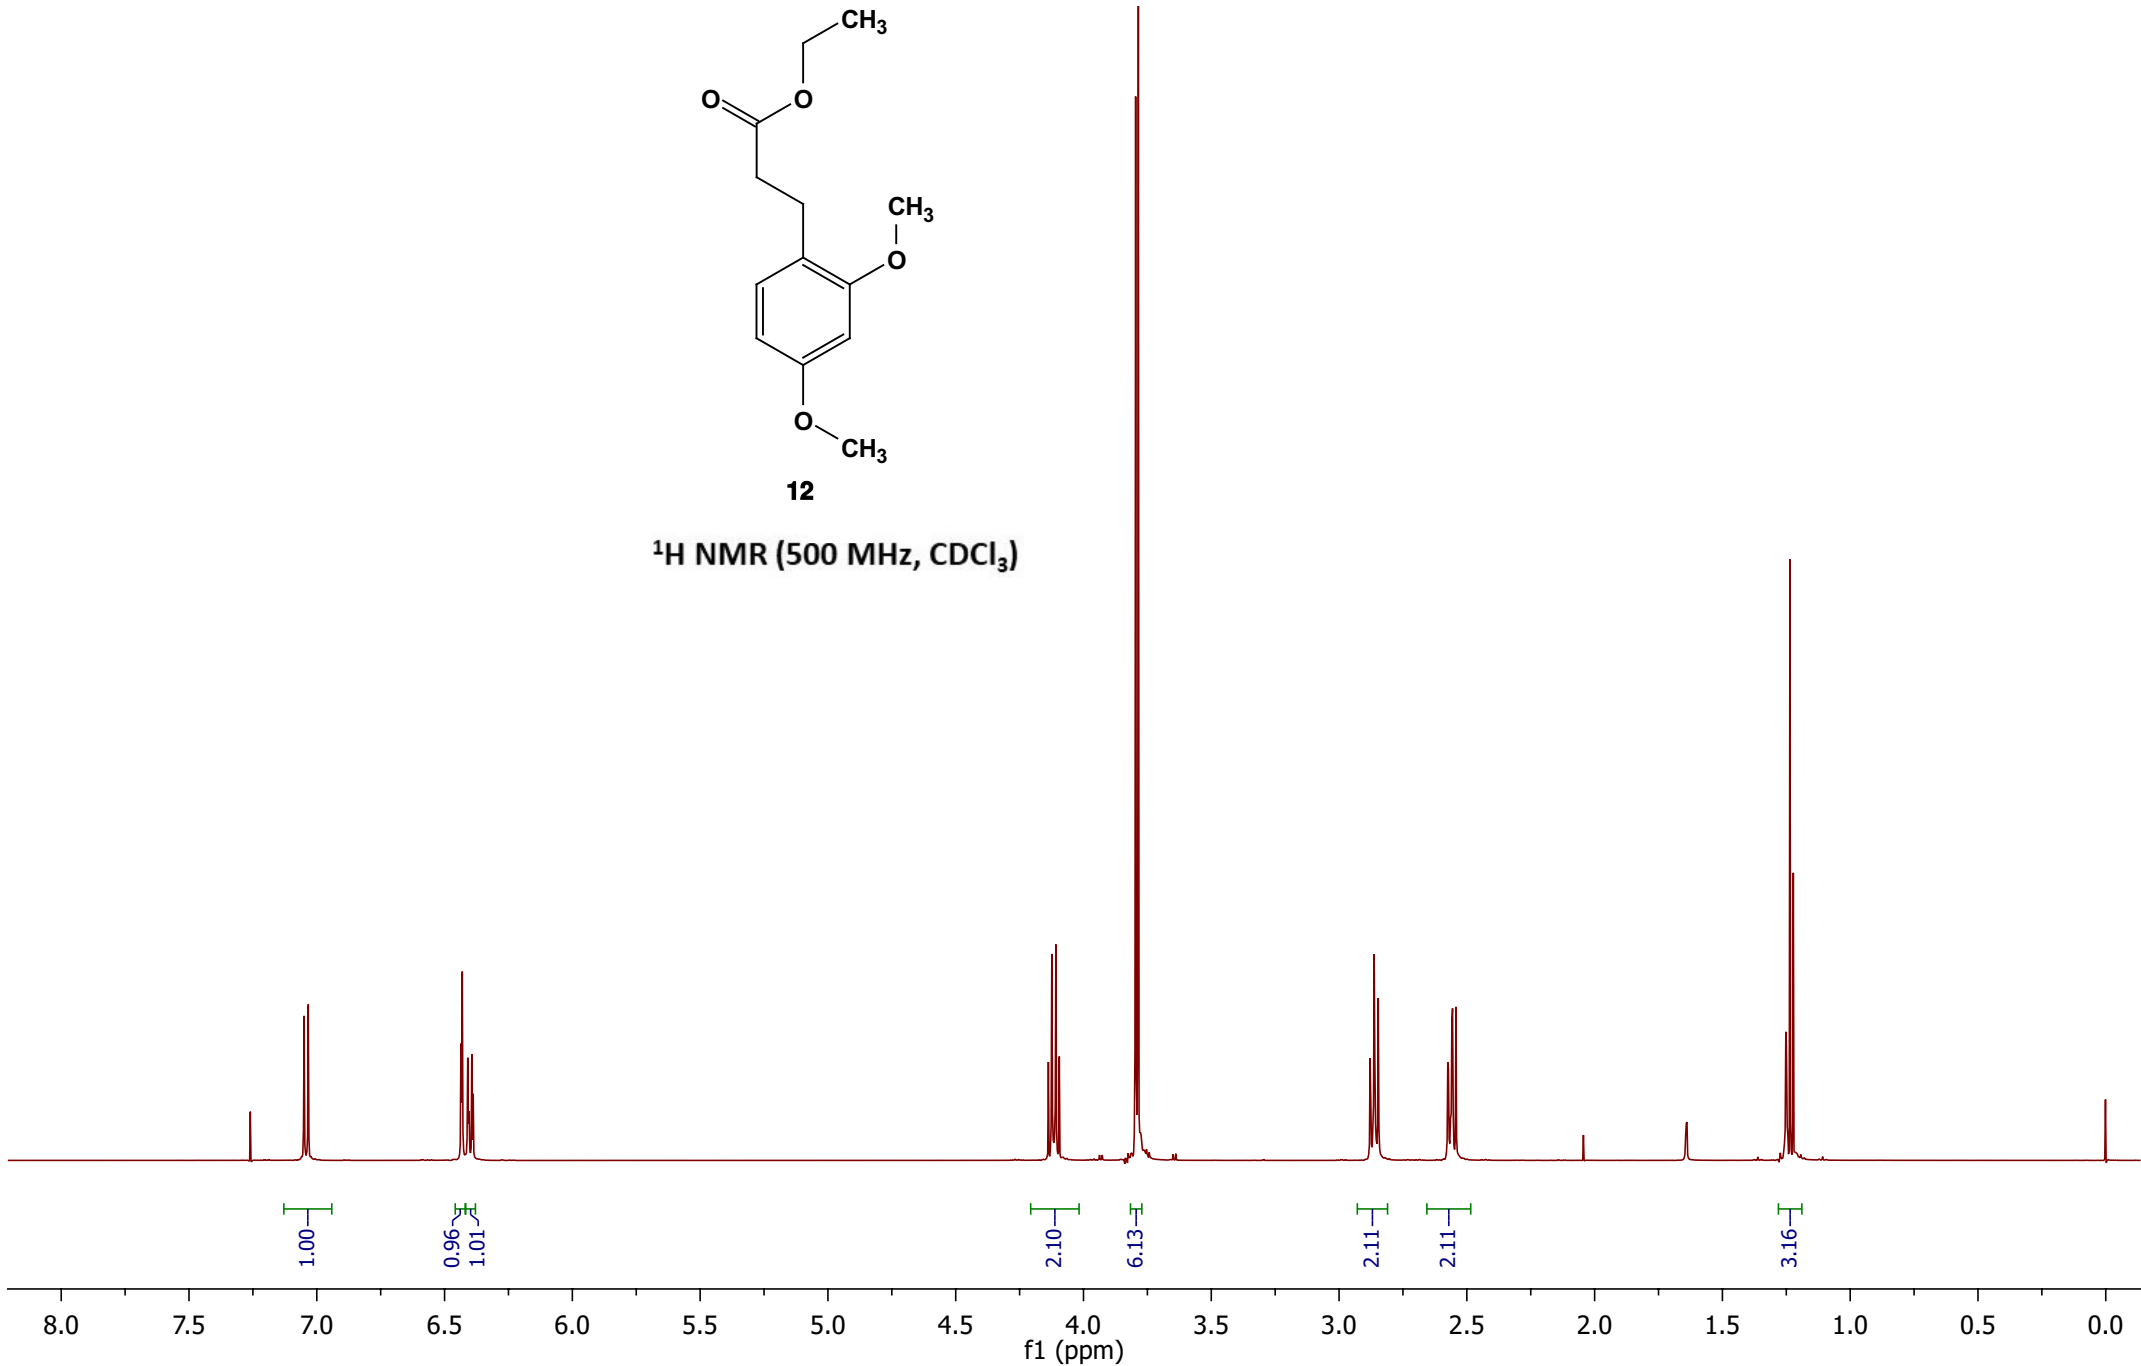



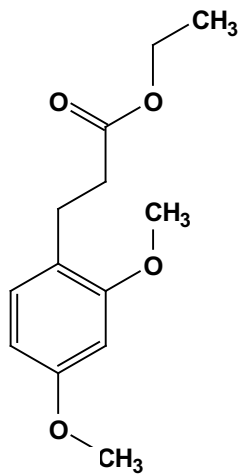

12

$^{13}\text{C}$  NMR (125 MHz,  $\text{CDCl}_3$ )

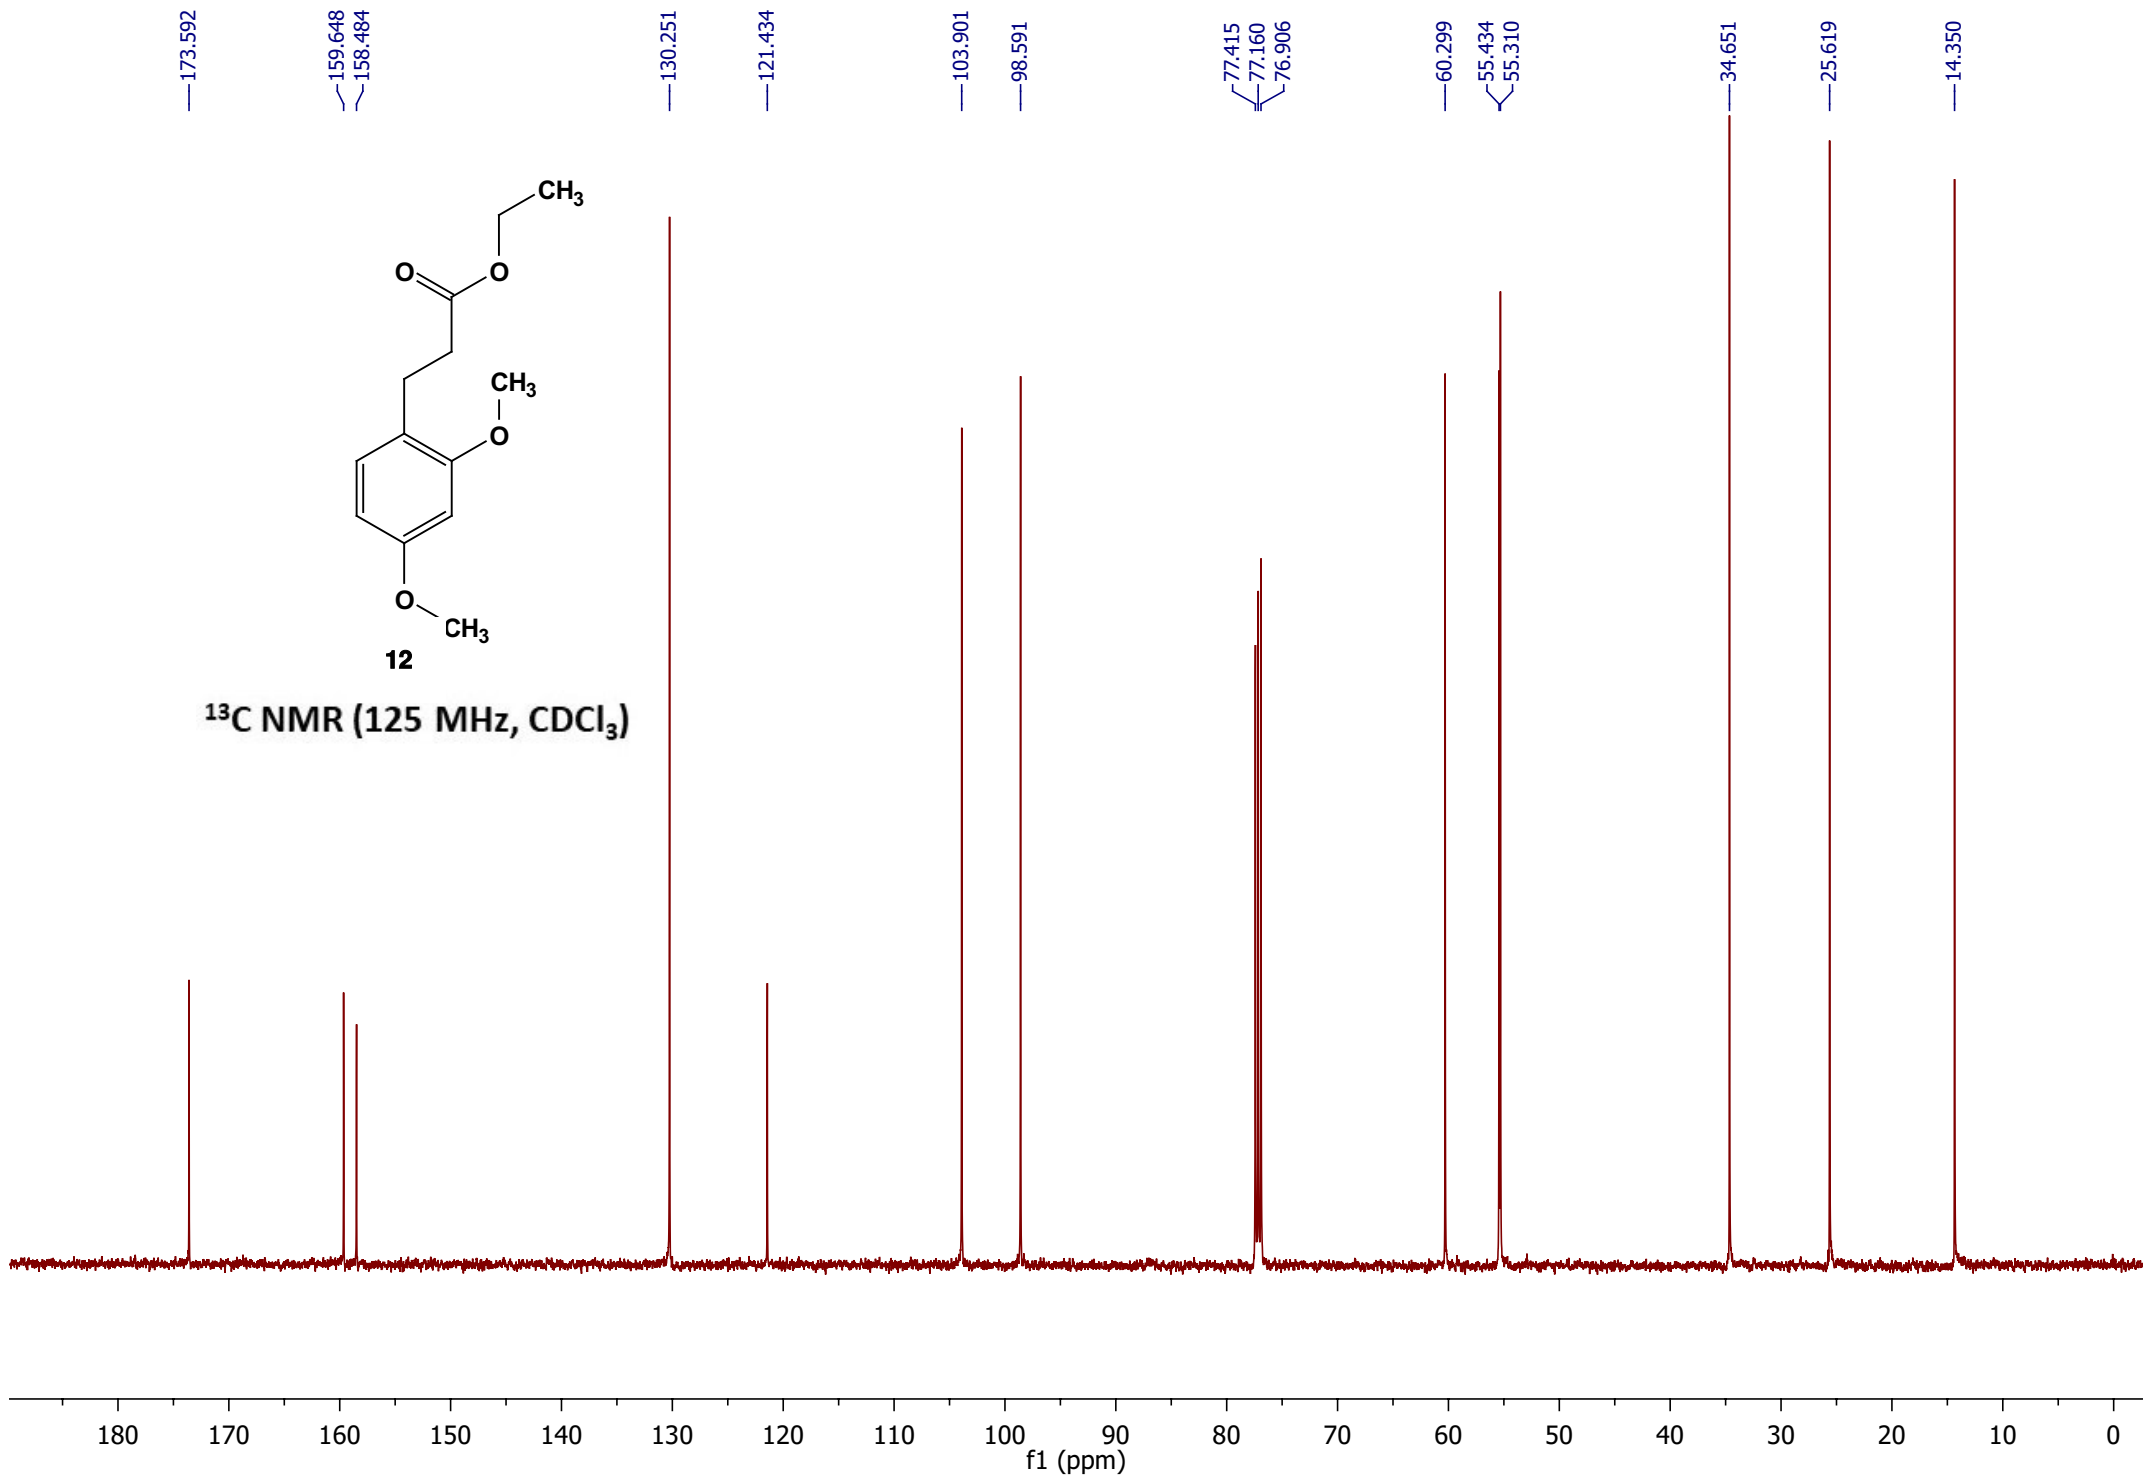

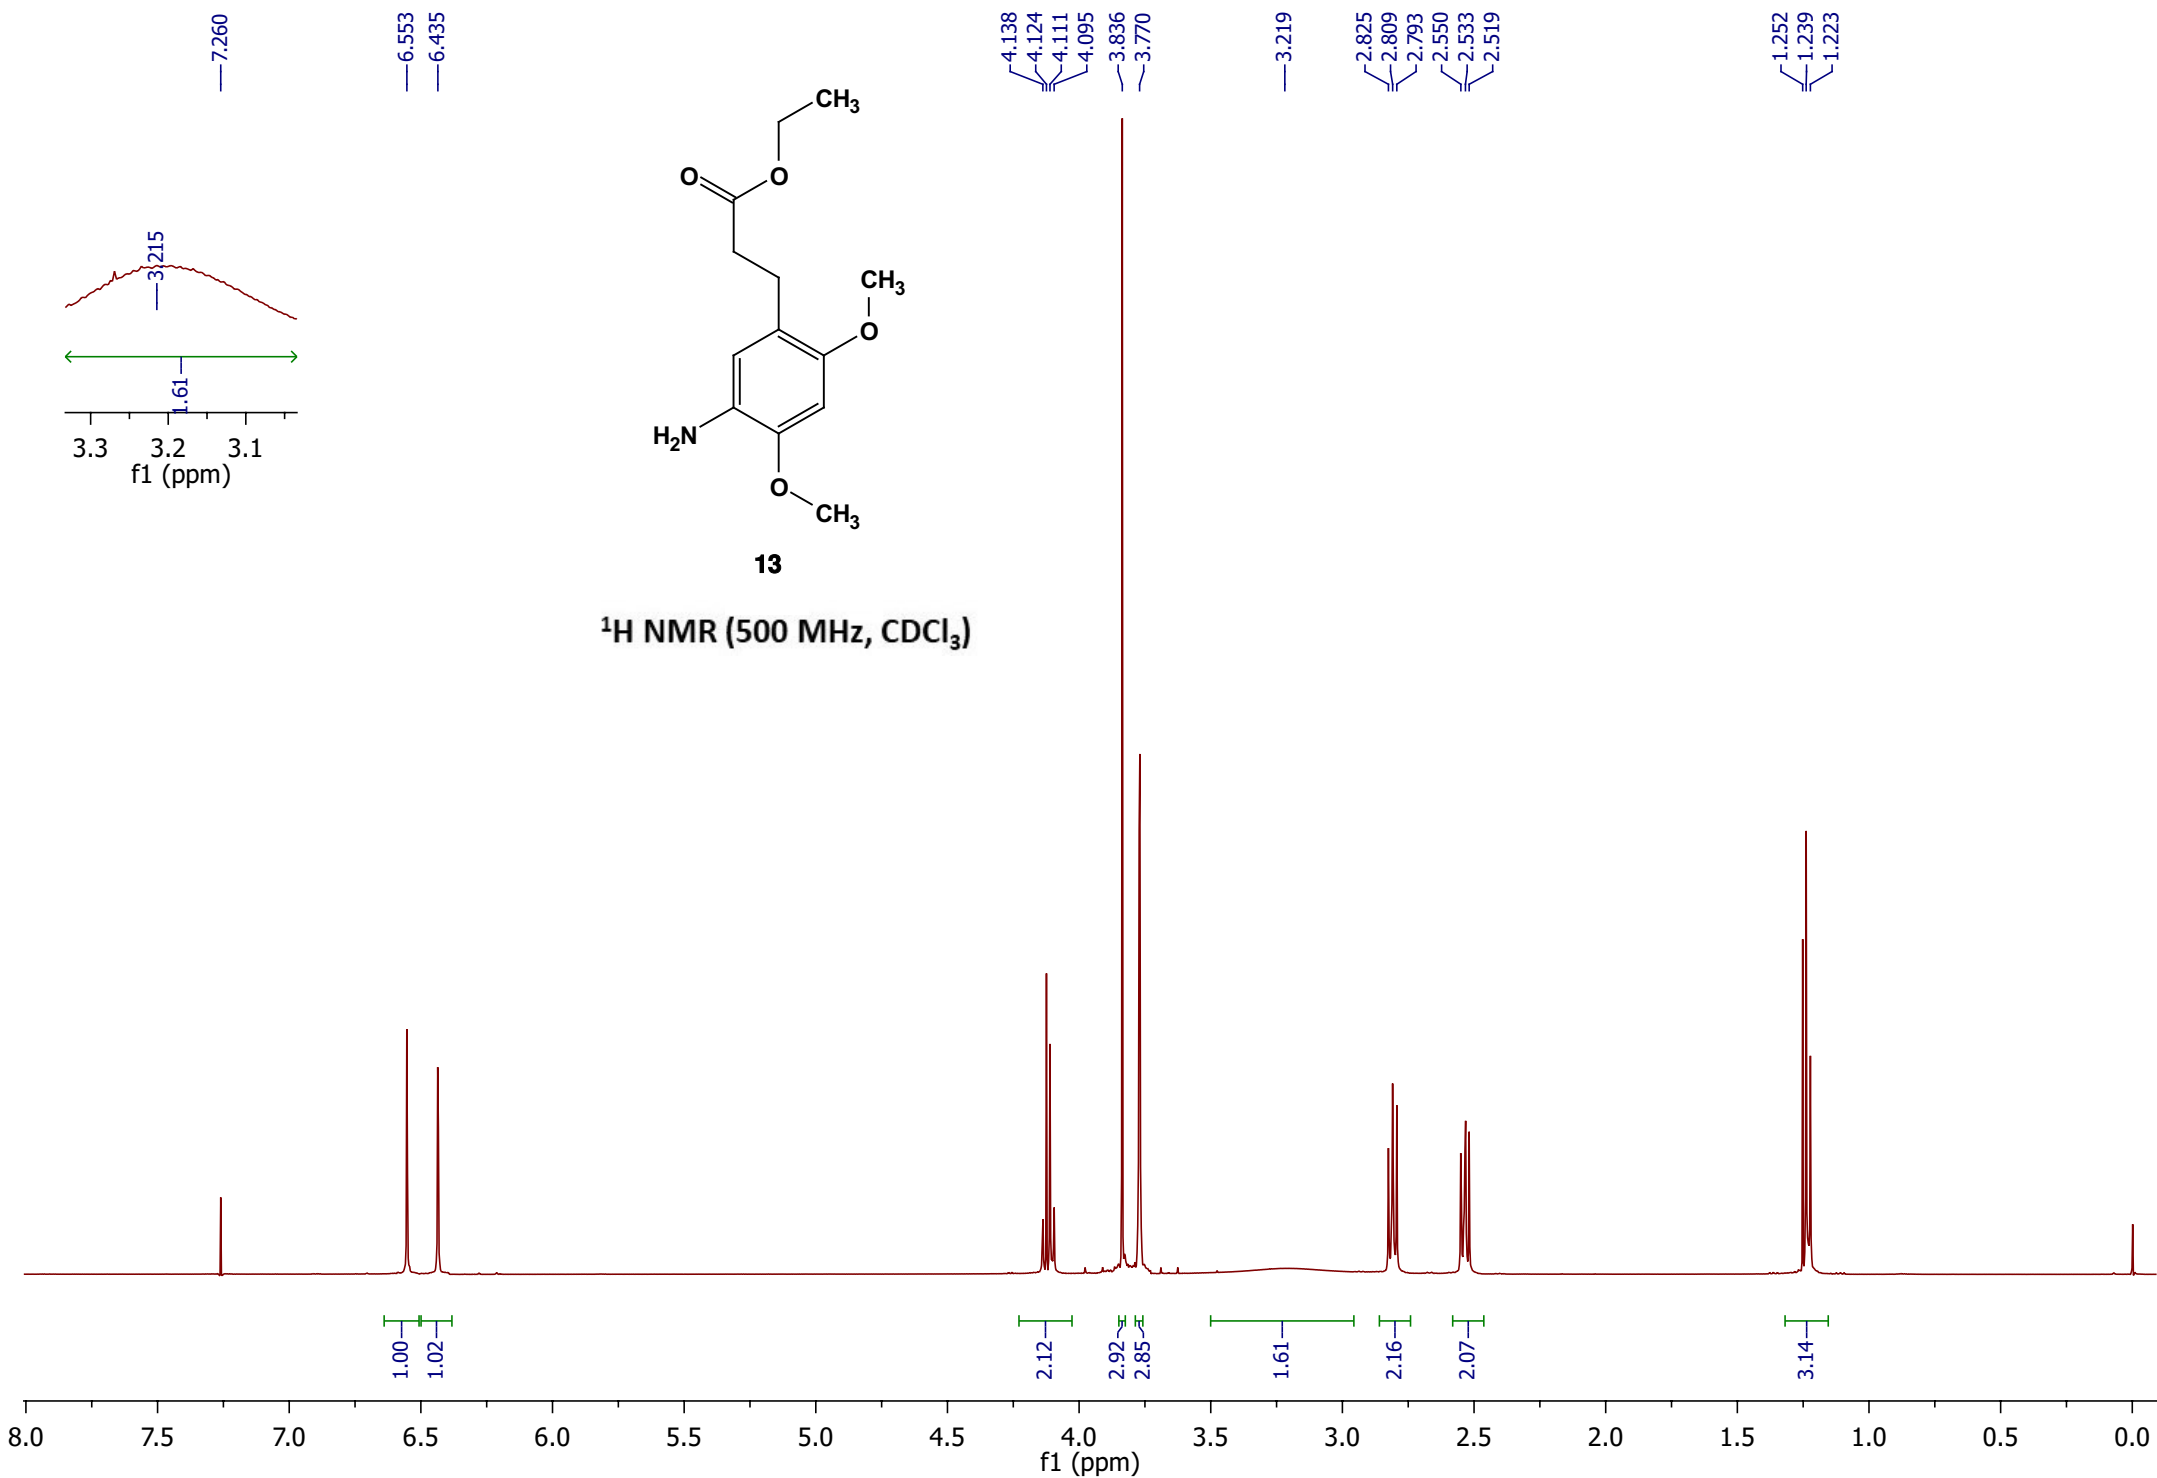

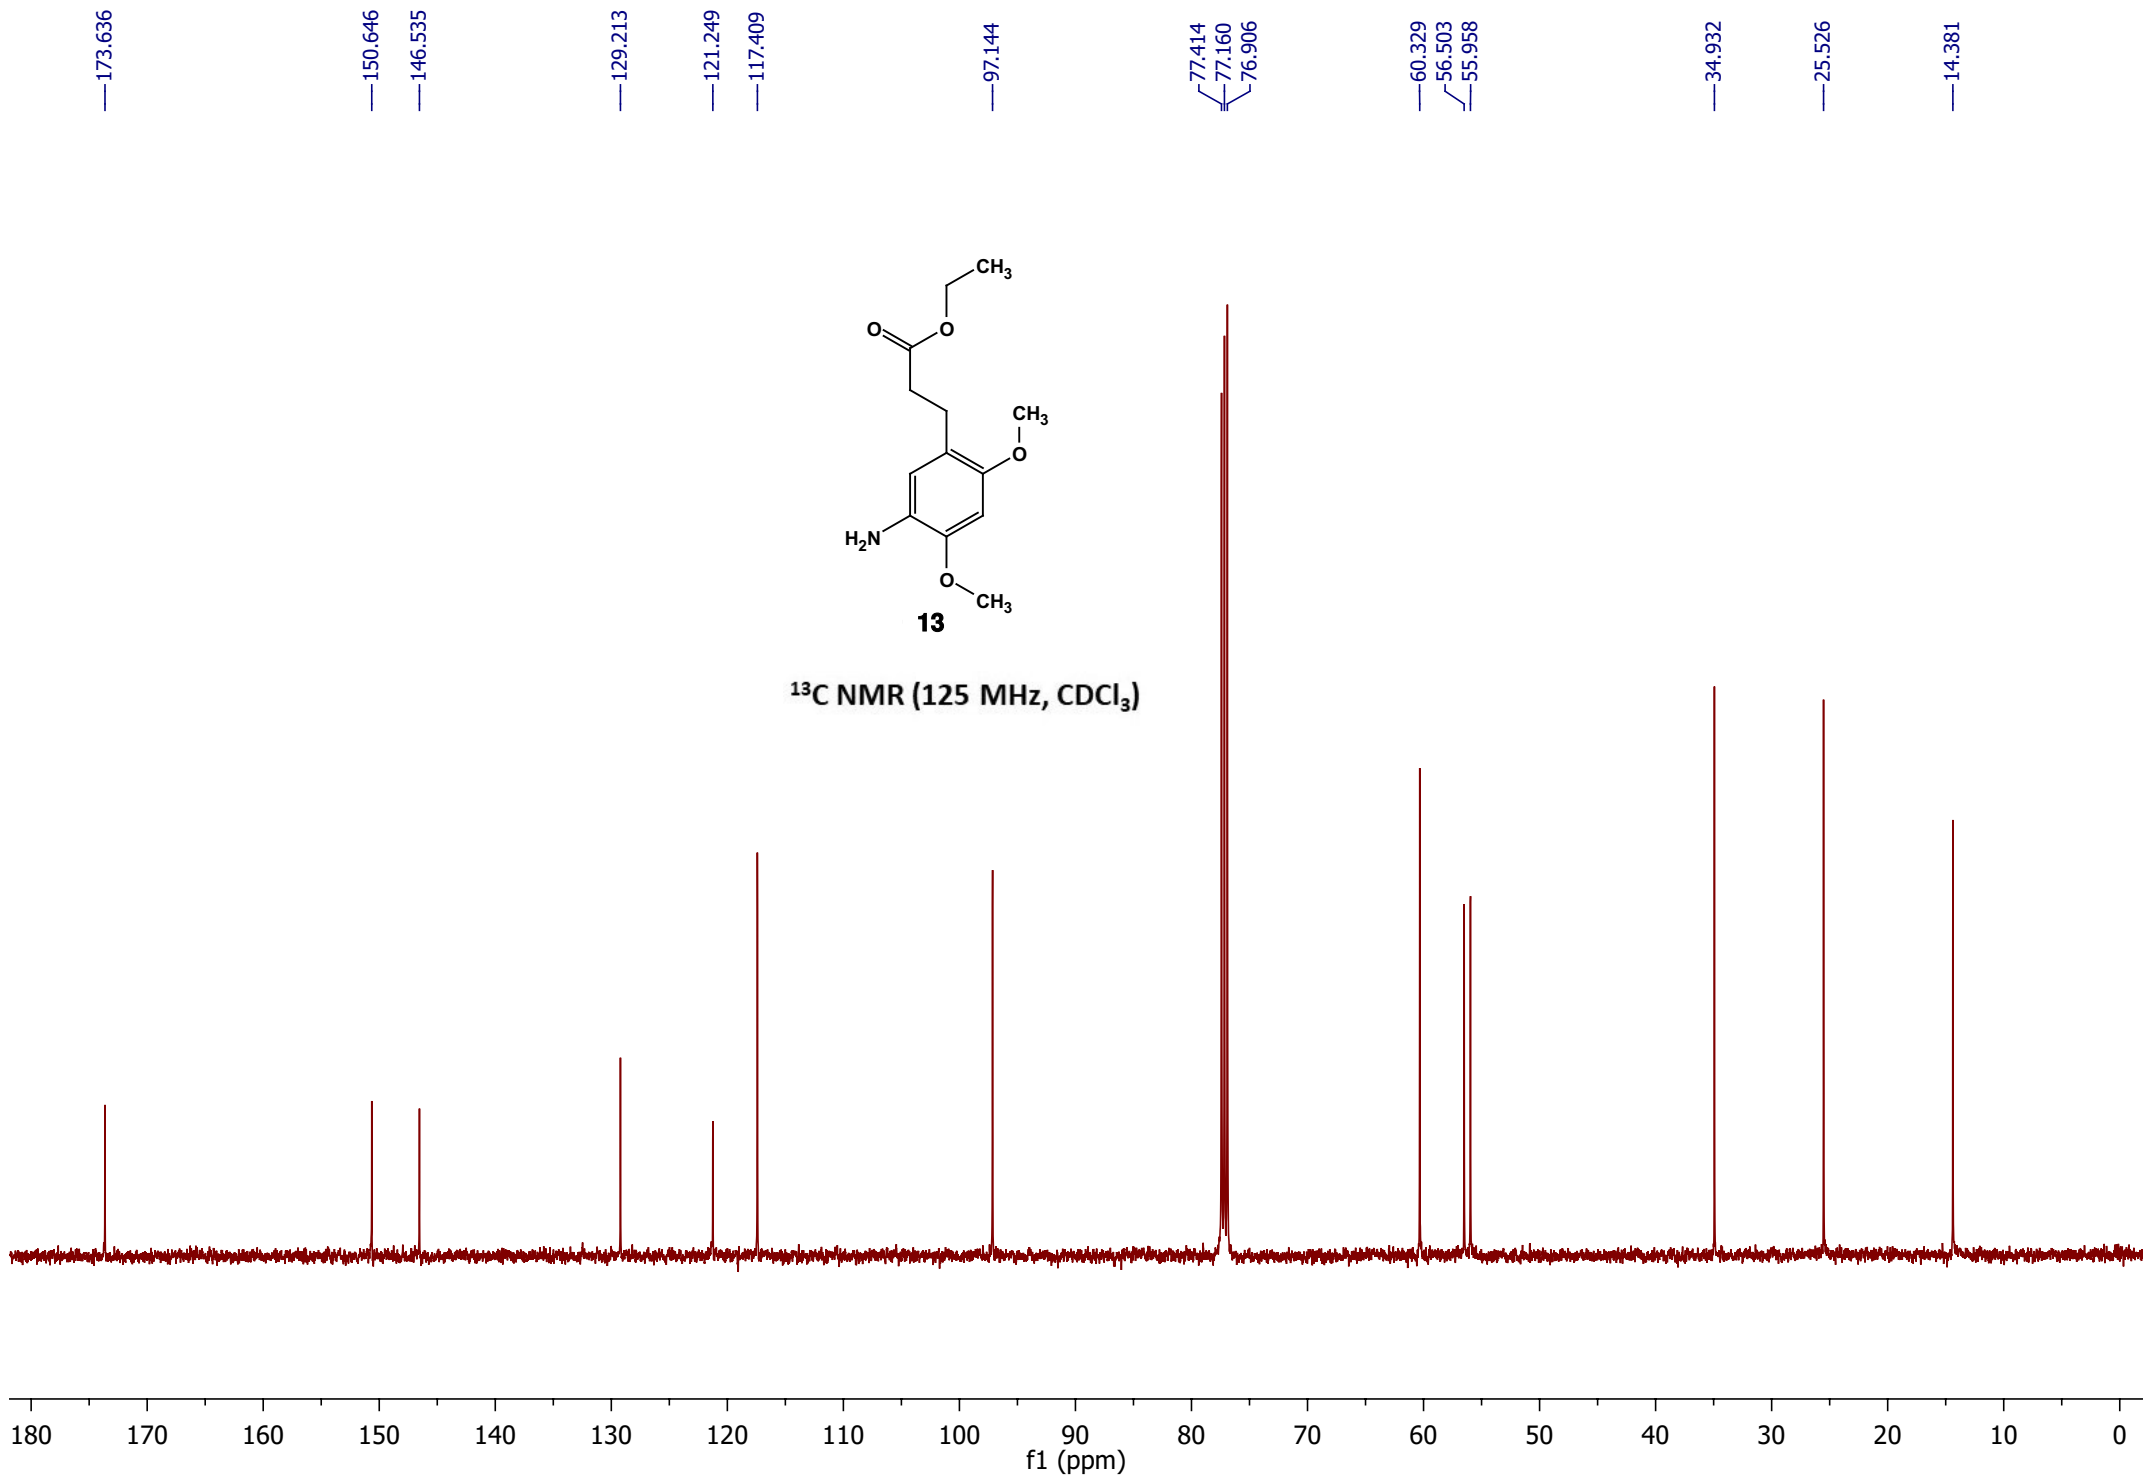

7.775  
7.766  
7.693  
7.686  
7.678  
7.414  
7.339  
7.274  
7.260  
7.251  
7.238  
7.229  
6.614

1.569

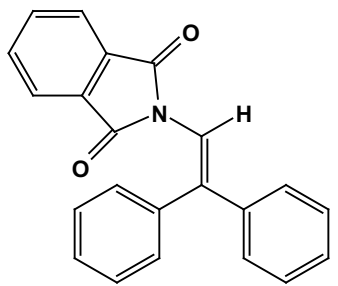

18

<sup>1</sup>H NMR (500 MHz, CDCl<sub>3</sub>)

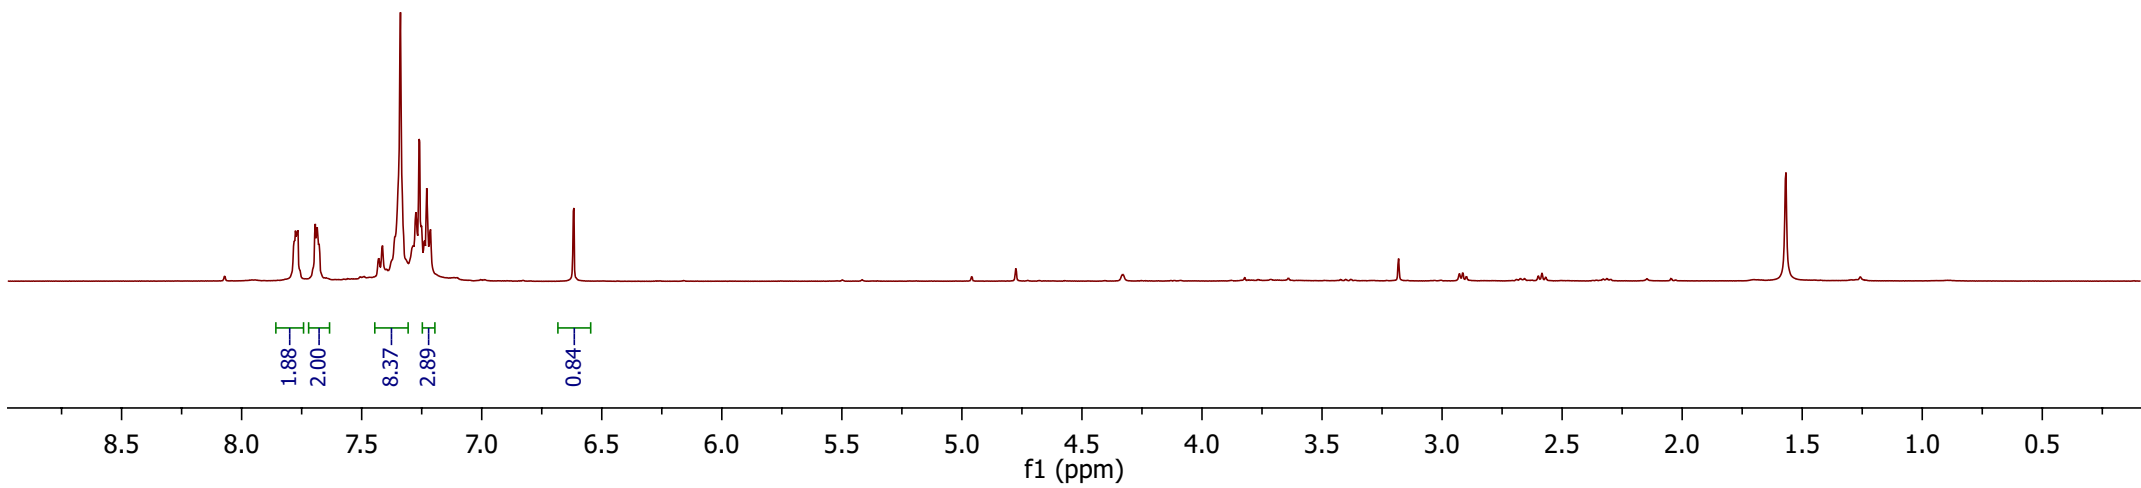

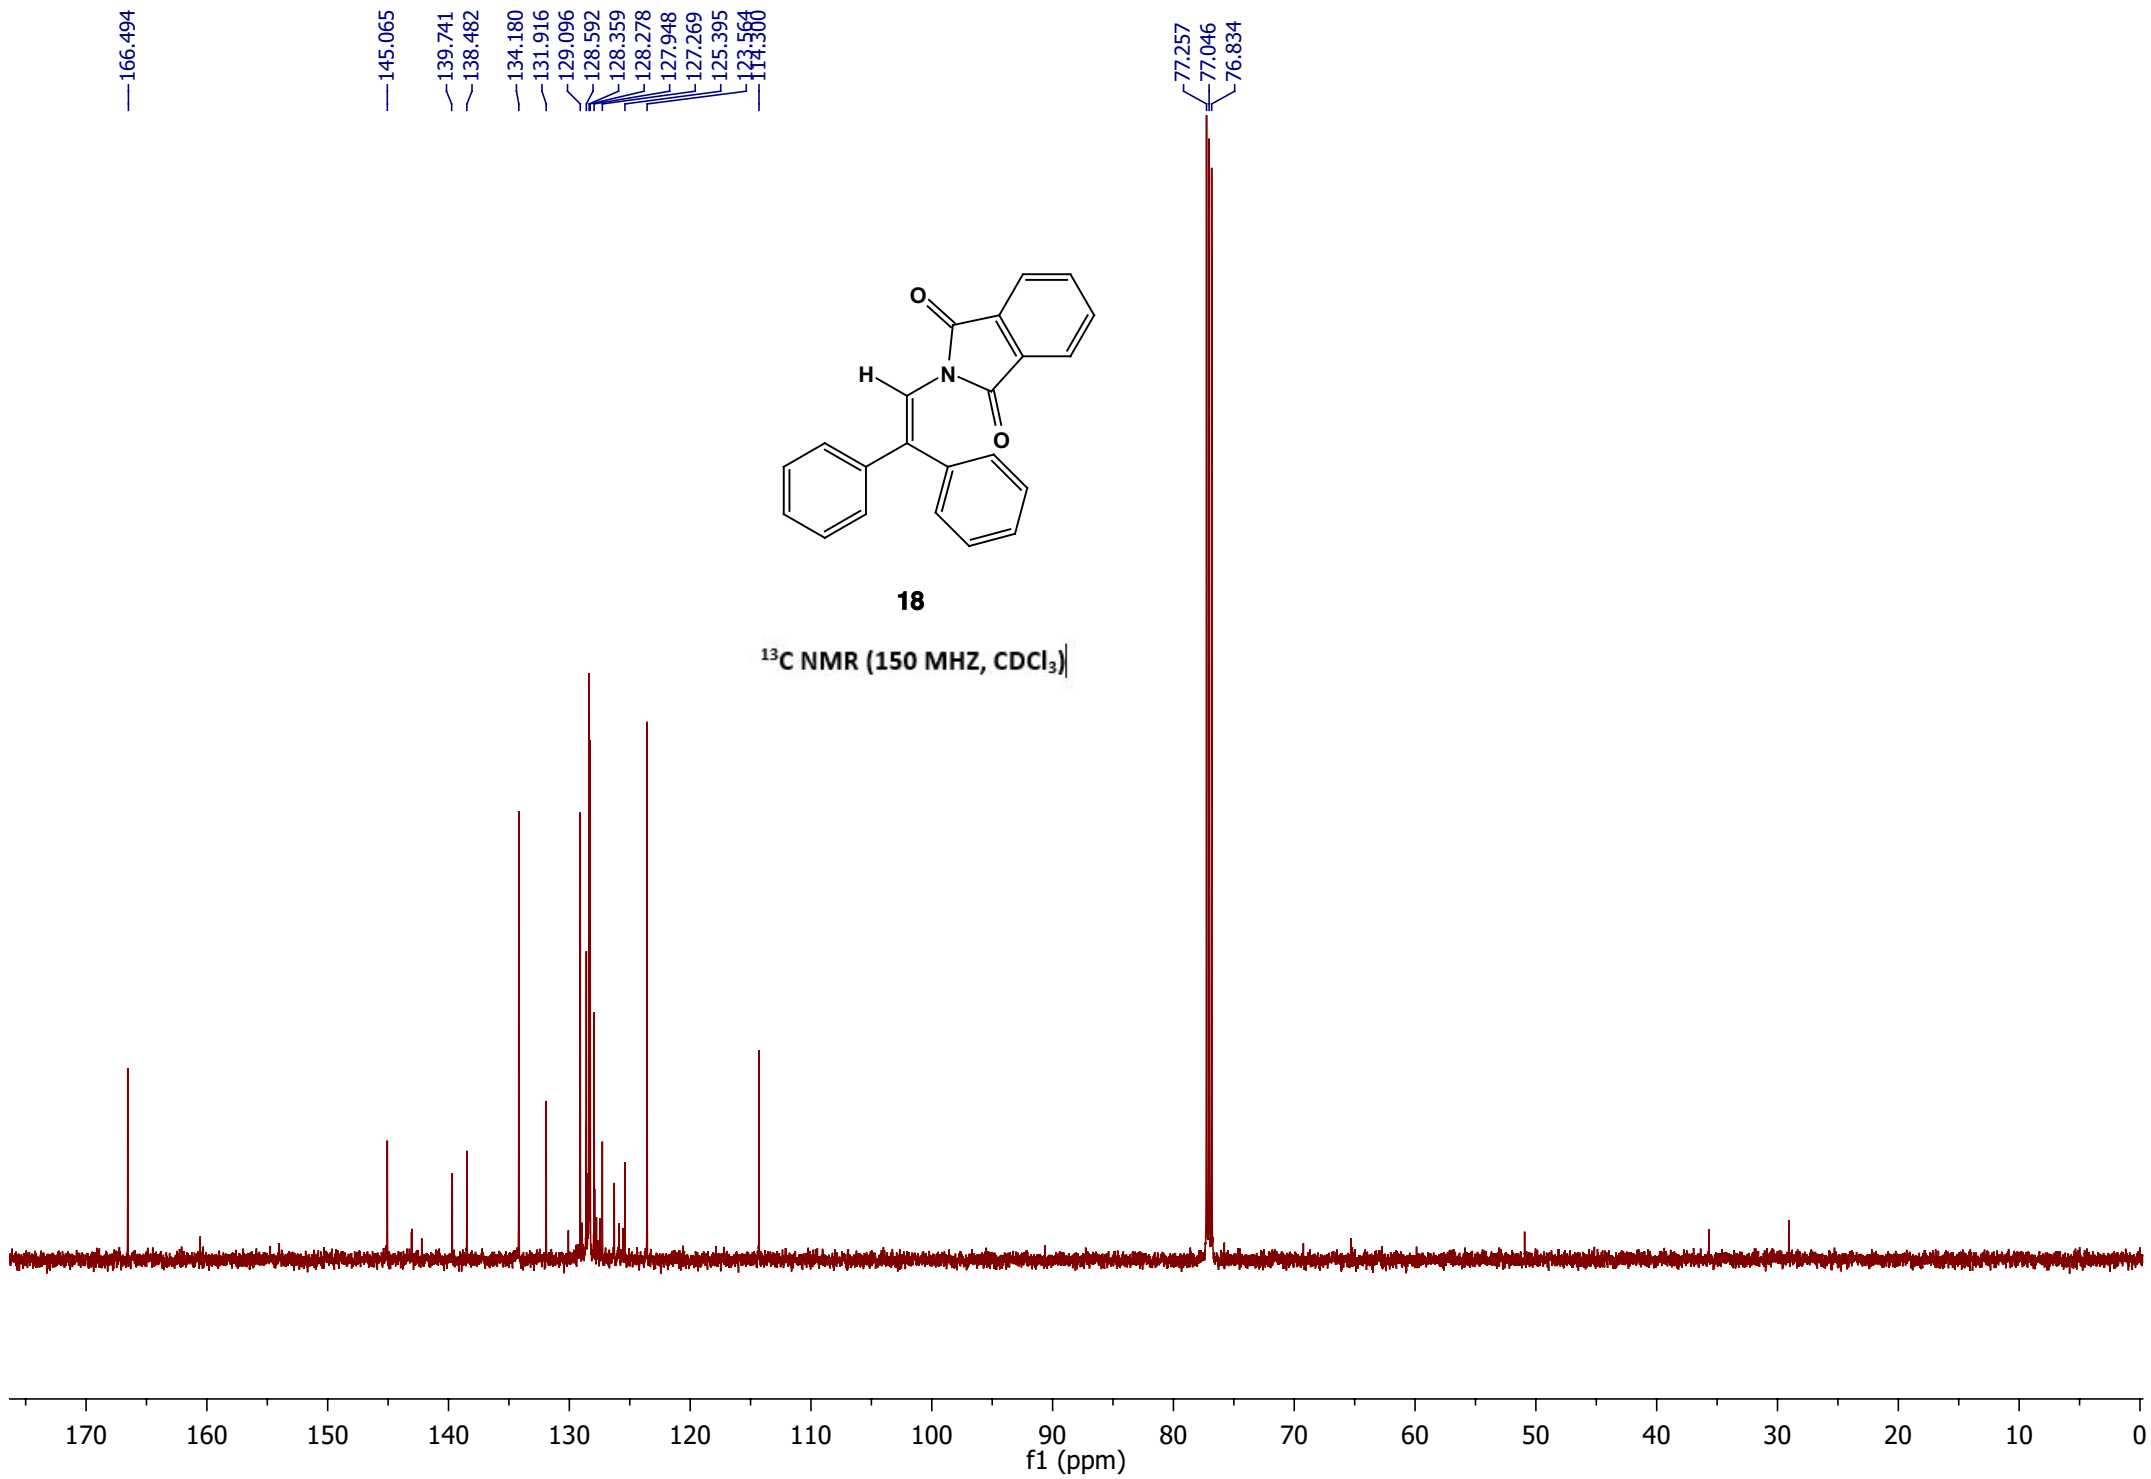

Supplement: d2ob02040h1.pdf [file d2ob02040h1.pdf]
